# Supplementary material for: Psychological interventions for chronic, non-specific low back pain: systematic review with network meta-analysis
Source: HighWire-hosted journal article supplement (doi:10.1136/bmj-2021-067718), 2022-03-30
Supplement: hoem067718.ww.pdf [file hoem067718.ww.pdf]

## Supplementary Material

### Items

**Supplementary A.** Search strategies

**Supplementary B.** Treatment node classification

**Supplementary Table 1.1** Initial treatment node classification

**Supplementary Table 1.2** Revised treatment node classification

**Supplementary C.** Studies excluded at full text-level

**Supplementary D.** Individual study characteristics of included studies

**Supplementary Table 2.** Individual study characteristics of included studies for physical function and pain intensity

**Supplementary Table 3.** Individual study characteristics of included studies for fear avoidance, health-related quality of life, intervention compliance and safety

**Supplementary E.** Individual participant characteristics of included studies

**Supplementary Table 4.** Individual patient characteristics of studies included in the network meta-analysis for physical function and pain intensity

**Supplementary Table 5.** Individual patient characteristics of studies included in the network meta-analysis for fear avoidance

**Supplementary F.** Summary of physiotherapy care treatment node

**Supplementary Table 6.** Summary of individual studies involving physiotherapy care as a co-intervention or comparison intervention

**Supplementary G.** Studies not included in the network meta-analysis

**Supplementary Table 7.** Effect estimates for studies excluded from the network meta-analysis for physical function and pain intensity

**Supplementary Table 8.** Effect estimates for studies excluded from the network meta-analysis for fear avoidance

**Supplementary H.** Assessment of transitivity

**Supplementary Table 9.1** Assessment of transitivity: network of interventions for improving physical function

**Supplementary Table 9.2** Assessment of transitivity: network of interventions for reducing pain intensity

**Supplementary Table 9.3** Assessment of transitivity: network of interventions for reducing fear avoidance

**Supplementary Table 9.4** Assessment of transitivity: network of interventions for improving intervention compliance

**Supplementary I.** Results from direct and network evidence for physical function and pain intensity

**Supplementary Table 10.1** Physical function at post-intervention

**Supplementary Table 10.2** Physical function at short-term treatment sustainability

**Supplementary Figure 1.** Forest plots of network results for physical function at short-term treatment sustainability

**Supplementary Table 10.3** Physical function at mid-term treatment sustainability

**Supplementary Figure 2.** Forest plots of network results for physical function at mid-term treatment sustainability

**Supplementary Table 10.4** Physical function at long-term treatment sustainability

**Supplementary Figure 3.** Forest plots of network results for physical function at long-term treatment sustainability

**Supplementary Table 10.5** Pain intensity at post-intervention

**Supplementary Table 10.6** Pain intensity at short-term treatment sustainability

**Supplementary Figure 4.** Forest plots of network results for pain intensity at short-term treatment sustainability

**Supplementary Table 10.7** Pain intensity at mid-term treatment sustainability

**Supplementary Figure 5.** Forest plots of network results for pain intensity at mid-term

---

treatment sustainability

**Supplementary Table 10.8** Pain intensity at long-term treatment sustainability

**Supplementary Figure 6.** Forest plots of network results for pain intensity at long-term treatment sustainability

**Supplementary J.** Risk of bias judgments

**Supplementary Table 11.1** Risk of bias judgments for studies assessing physical function

**Supplementary Table 11.2** Risk of bias judgments for studies assessing pain intensity

**Supplementary Table 11.3** Risk of bias judgments for studies assessing fear avoidance

**Supplementary K.** CINeMA results for physical function and pain intensity

**Supplementary Table 12.1** Physical function at post-intervention

**Supplementary Table 12.2** Physical function at short-term treatment sustainability

**Supplementary Table 12.3** Physical function at mid-term treatment sustainability

**Supplementary Table 12.4** Physical function at long-term treatment sustainability

**Supplementary Table 12.5** Pain intensity at post-intervention

**Supplementary Table 12.6** Pain intensity at short-term treatment sustainability

**Supplementary Table 12.7** Pain intensity at mid-term treatment sustainability

**Supplementary Table 12.8** Pain intensity at long-term treatment sustainability

**Supplementary L.** Rank results for physical function and pain intensity

**Supplementary Table 13.1** Physical function at post-intervention

**Supplementary Table 13.2a** Physical function at short-term treatment sustainability

**Supplementary Table 13.2b** Physical function at short-term treatment sustainability, after resolving for inconsistency.

**Supplementary Table 13.3a** Physical function at mid-term treatment sustainability

**Supplementary Table 13.3b** Physical function at mid-term treatment sustainability, after resolving for inconsistency.

**Supplementary Table 13.4** Physical function at long-term treatment sustainability

**Supplementary Table 13.5** Pain intensity at post-intervention

**Supplementary Table 13.6a** Pain intensity at short-term treatment sustainability

**Supplementary Table 13.6b** Pain intensity at short-term treatment sustainability, after removing inconsistency

**Supplementary Table 13.7** Pain intensity at mid-term treatment sustainability

**Supplementary Table 13.8** Pain intensity at long-term treatment sustainability

**Supplementary M.** Comparison-adjusted funnel plots for physical function and pain intensity

**Supplementary Figure 7.** Physical function at post-intervention

**Supplementary Figure 8.** Physical function at short-term treatment sustainability

**Supplementary Figure 9.** Physical function at mid-term treatment sustainability

**Supplementary Figure 10.** Physical function at long-term treatment sustainability

**Supplementary Figure 11.** Pain intensity at post-intervention

**Supplementary Figure 12.** Pain intensity at short-term treatment sustainability

**Supplementary Figure 13.** Pain intensity at mid-term treatment sustainability

**Supplementary Figure 14.** Pain intensity at long-term treatment sustainability

**Supplementary N.** Sensitivity analyses for physical function and pain intensity

**Supplementary Table 14.1** Physical function at post-intervention, excluding studies with high risk of bias

**Supplementary Table 14.2** Physical function at post-intervention, only including studies using intention-to-treatment analysis

**Supplementary Table 14.3** Physical function at post-intervention, excluding studies published prior to year 1995

**Supplementary Table 14.4** Physical function at post-intervention, excluding studies published prior to year 2000

**Supplementary Table 14.5** Physical function at post-intervention, excluding studies published prior to year 2005

---

- 
- Supplementary Table 14.6** Physical function at post-intervention, excluding studies of patients with leg pain
- Supplementary Table 14.7** Physical function at mid-term treatment sustainability, excluding studies involving data imputed from median and interquartile ranges
- Supplementary Table 14.8** Physical function at short-term treatment sustainability, removing portions of the evidence in the network to address inconsistency
- Supplementary Table 14.9** Physical function at mid-term treatment sustainability, removing portions of the evidence in the network to address inconsistency
- Supplementary Table 14.10** Pain intensity at post-intervention, excluding studies with high risk of bias
- Supplementary Table 14.11** Pain intensity at post-intervention, only including studies using intention-to-treatment analysis
- Supplementary Table 14.12** Pain intensity at post-intervention, excluding studies published prior to year 1995
- Supplementary Table 14.13** Pain intensity at post-intervention, excluding studies published prior to year 2000
- Supplementary Table 14.14** Pain intensity at post-intervention, excluding studies published prior to year 2005
- Supplementary Table 14.15** Pain intensity at post-intervention, excluding studies of patients with leg pain
- Supplementary Table 14.16** Pain intensity at post-intervention, excluding studies involving data imputed from median and interquartile ranges
- Supplementary Table 14.17** Pain intensity at short-term treatment sustainability, excluding studies involving data imputed from median and interquartile ranges
- Supplementary Table 14.18** Pain intensity at mid-term treatment sustainability, excluding studies involving data imputed from median and interquartile ranges
- Supplementary Table 14.19** Pain intensity at short-term treatment sustainability, removing portions of the evidence in the network to address inconsistency
- Supplementary O.** Assessment of global inconsistency
- Supplementary Table 15.** Results of global inconsistency tests for the primary analyses
- Supplementary Table 16.** Results of global inconsistency tests for the sensitivity analyses conducted to address inconsistency
- Supplementary P.** Results of side-splitting method for physical function and pain intensity
- Supplementary Table 17.1** Physical function at post-intervention
- Supplementary Table 17.2** Physical function at short-term treatment sustainability
- Supplementary Table 17.3** Physical function at mid-term treatment sustainability
- Supplementary Table 17.4** Physical function at long-term treatment sustainability
- Supplementary Table 17.5** Pain intensity at post-intervention
- Supplementary Table 17.6** Pain intensity at short-term treatment sustainability
- Supplementary Table 17.7** Pain intensity at mid-term treatment sustainability
- Supplementary Table 17.8** Pain intensity at long-term treatment sustainability
- Supplementary Q.** Results from direct and network evidence for fear avoidance and intervention compliance
- Supplementary Figure 15.** Network plots of fear avoidance at post-intervention, and short, mid, and long-term follow-up.
- Supplementary Table 18.1** Fear avoidance at post-intervention
- Supplementary Figure 16.** Forest plots of network results for fear avoidance at post-intervention
- Supplementary Table 18.2** Fear avoidance at short-term treatment sustainability
- Supplementary Figure 17.** Forest plots of network results for fear avoidance at short-term treatment sustainability
- Supplementary Table 18.3** Fear avoidance at mid-term treatment sustainability
-

---

**Supplementary Figure 18.** Forest plots of network results for fear avoidance at mid-term treatment sustainability

**Comment.** Fear avoidance at long-term treatment sustainability

**Supplementary Figure 19.** Network plot for intervention compliance at post-intervention

**Supplementary Table 18.4** Intervention compliance at post-intervention

**Supplementary Figure 20.** Forest plot of network results for intervention compliance at post-intervention

**Supplementary R.** CINeMA results for fear avoidance

**Supplementary Table 19.1** Fear avoidance at post-intervention

**Supplementary Table 19.2** Fear avoidance at short-term treatment sustainability

**Supplementary Table 19.3** Fear avoidance at mid-term treatment sustainability

**Comment.** Fear avoidance at long-term treatment sustainability

**Supplementary S.** Rank results for fear avoidance and intervention compliance

**Supplementary Table 20.1** Fear avoidance at post-intervention

**Supplementary Table 20.2** Fear avoidance at short-term treatment sustainability

**Supplementary Table 20.3** Fear avoidance at mid-term treatment sustainability

**Comment.** Fear avoidance at long-term treatment sustainability

**Supplementary Table 20.4** Intervention compliance at post-intervention

**Supplementary T.** Comparison-adjusted funnel plots for fear avoidance and intervention compliance

**Supplementary Figure 21.** Fear avoidance at post-intervention

**Supplementary Figure 22.** Fear avoidance at short-term treatment sustainability

**Supplementary Figure 23.** Fear avoidance at mid-term treatment sustainability

**Supplementary Figure 24.** Fear avoidance at long-term treatment sustainability

**Supplementary Figure 25.** Intervention compliance at post-intervention

**Supplementary U.** Summary of health-related quality of life

**Supplementary Table 21.** Effect sizes for health-related quality of life

**Supplementary V.** Sensitivity analyses for fear avoidance and intervention compliance

**Supplementary Table 22.1** Fear avoidance at post-intervention, excluding studies with high risk of bias

**Supplementary Table 22.2** Fear avoidance at post-intervention, only including studies using intention-to-treatment analysis

**Comment.** Fear avoidance at post-intervention, excluding studies published prior to year 2000.

**Supplementary Table 22.3** Fear avoidance at post-intervention, excluding studies of patients with leg pain.

**Supplementary Table 22.4** Intervention compliance at post-intervention, excluding studies with high risk of bias.

**Supplementary Table 22.5** Intervention compliance at post-intervention, only including studies using intention-to-treatment analysis

**Supplementary Table 22.6** Intervention compliance at post-intervention, excluding studies published prior to year 2000

**Supplementary Table 22.7** Intervention compliance at post-intervention, excluding studies of patients with leg pain

**Supplementary W.** Assessment of global inconsistency for fear avoidance and intervention compliance

**Supplementary Table 23.** Results of global inconsistency tests for fear avoidance and intervention compliance

**Supplementary X.** Results of side-splitting method for fear avoidance and intervention compliance

**Supplementary Table 24.1** Fear avoidance at post-intervention

**Supplementary Table 24.2** Fear avoidance at short-term treatment sustainability

---

---

**Supplementary Table 24.3** Fear avoidance at mid-term treatment sustainability

**Comment.** Fear avoidance at long-term treatment sustainability

**Supplementary Table 24.4** Intervention compliance at post-intervention

**Supplementary Y.** Results of meta-regression for primary and secondary outcomes

**Supplementary Table 25.** Results of meta-regression for physical function

**Supplementary Table 26.** Results of meta-regression for pain intensity

**Supplementary Table 27.** Results of meta-regression for fear avoidance

**Supplementary Table 28.** Results of meta-regression for intervention compliance

**References**

---

## Supplementary A. Search strategies

### Database: Ovid MEDLINE

1. exp Back Pain/ or exp Low Back Pain/ or exp Backache/
2. (back pain or low back pain or lumbar pain or lumbago or dorsalgia or spinal pain or vertebral pain or backache or lumbar spine).ti,ab.
3. 1 or 2
4. exp Behavior Therapy/ or exp Cognitive Therapy/ or \*Conditioning, Operant/ or exp Reinforcement, Psychology/
5. (operant conditioning or reinforcement or psychological intervention or psychological therapy).ab,ti.
6. (cognitiv\* adj1 (treatment\* or therap\* or intervention\*)).ab,ti.
7. (behavio?r\* adj1 (treatment\* or therap\* or intervention\* or techniqu\* or modif\* or change\*)).ab,ti.
8. (graded exposure or desensiti\* or imagery or goal setting).ab,ti.
9. (acceptance and commitment therapy or CBT).ab,ti.
10. 4 or 5 or 6 or 7 or 8 or 9
11. exp Mindfulness/ or \*Mind-Body Therapies/ or exp Meditation/ or exp Relaxation/ or exp Relaxation Therapy/
12. (mindfulness based stress reduction\*).ab,ti.
13. (mindfulness or mind-body therapies or meditation or relaxation or relaxation therap\*).ab,ti.
14. (mbsr\* or mbct\*).ab,ti.
15. 11 or 12 or 13 or 14
16. (cognitive functional therapy or CFT).ab,ti.
17. exp Health Education/ or exp Health Promotion/ or exp Motivation/
18. (health education or health promotion or motivation).ab,ti.
19. ((health or wellness or life-style or behav\*) adj1 coach\*).ab,ti.
20. ((wellness or behav\*) adj1 intervention\*).ab,ti.
21. or/ 17 or 18 or 19 or 20
22. exp Biofeedback, Psychology/ or exp Feedback, Psychological/
23. (electromyograph\* or electromyogram\* or EMG\*).ab,ti.
24. (bio-feedback or feedback).ab,ti.
25. 22 or 23 or 24
26. (pain neuroscience education or pain education or neuroscience education or pain physiology education or neuro-physiology education or therapeutic education).ab,ti.
27. exp Counseling/
28. (counseling or supportive psychotherap\*).ab,ti.
29. 27 or 28
30. 10 or 15 or 16 or 21 or 25 or 26 or 29
31. 3 and 30
32. exp Randomized controlled trial/ or \*Clinical Trial/ or \*Random allocation/ or exp Controlled clinical trial/
33. randomized controlled trial.pt.
34. (random\* adj3 trial).ab,ti.
35. (randomi?ed controlled trial or clinical trial or random allocation or controlled clinical trial).ab,ti.
36. 32 or 33 or 34 or 35

37. 31 and 36
38. limit 37 to humans

**Database: Ovid EMBASE**

1. exp Back Pain/ or exp Low Back Pain/ or exp Backache
2. (back pain or low back pain or backache or lumbar pain or lumbago or dorsalgia or spinal pain or vertebral pain or backache or lumbar spine).ti,ab.
3. 1 or 2
4. Exp Cognitive behavioral therapy/ or exp Cognitive behavioral stress management/ or exp Behavior Therapy/ or exp Cognitive Therapy or \*Reinforcement/
5. (cognitiv\$ adj1 (treatment\$ or therap\$ or intervention\$)).ab,ti.
6. (behav\$ adj1 (treatment\$ or therap\$ or intervention\$ or technique\$ or modif\$ or change\$)).ab,ti.
7. (cognitive behavio?ral therapy or cognitive behavio?ral stress management or reinforcement or graded exposure or desensiti\$ or imagery or goal setting).ab,ti.
8. (acceptance and commitment therapy or CBT).ab,ti.
9. 4 or 5 or 6 or 7 or 8
10. Exp Mindfulness/ or exp Meditation/
11. (mindfulness or meditation or mindfulness based stress reduction\$ or mbsr or mcbt or relaxation technique\$ or relaxation therap\$).ab,ti.
12. 10 or 11
13. (cognitive functional therapy or CFT).ab,ti.
14. Exp Health education/ or exp Health promotion/ or exp Psychoeducation/ or exp Motivation
15. (health education or health promotion or psychoeducation or motivation).ab,ti.
16. ((health or wellness or life-style or behav\$) adj1 coach\$).ab,ti.
17. ((wellness or behav\$) adj1 intervention\$).ab,ti.
18. 14 or 15 or 16 or 17
19. \*Biofeedback/ or \*Feedback System/ or \*Electromyography/
20. (bio-feedback or feedback system or electromyography or electromyogram\$ or EMG\$).ab,ti.
21. 19 or 20
22. (pain neuroscience education or pain education or neuroscience education or pain physiology education or neuro-physiology education).ab,ti.
23. Exp Counseling/ or exp Directive counseling/ or exp Patient counseling/
24. (counseling or directive counseling or patient counseling or supportive psychotherap\$).ab,ti.
25. 23 or 24
26. 9 or 12 or 13 or 18 or 21 or 22 or 25
27. exp Randomized controlled trial/ or exp Random allocation/ or exp Controlled clinical trial/ or exp Controlled study/
28. (random\$ adj3 trial).ab,ti.
29. (random allocation or controlled clinical trial or controlled study).ab,ti.
30. 27 or 28 or 29
31. 3 and 26 and 30
32. limit 31 to human

### Database: Web of Science

1. TS="Back Pain" or TS="Low Back Pain" or TS="Backache"
2. TS=("lumbar pain" or lumbago or dorsalgia or "spinal pain" or "vertebral pain" or "lumbar spine")
3. #2 OR #1
4. TS=("Behav\* Therapy" or "Cognitive Therapy" or "Operant conditioning" or Reinforcement)
5. TS=("psychological intervention" or "psychological therapy")
6. TS=("cognitiv\* treatment\*" or "cognitiv\* intervention\*")
7. TS=("behav\* treatment\*" or "behav\* intervention\*" or "behav\* techniqu\*" or "behav\* modif\*" or "behav\* change\*")
8. TS=("graded exposure" or desensiti\* or imagery or "goal setting")
9. TS=("acceptance and commitment therapy" or CBT)
10. #9 OR #8 OR #7 OR #6 OR #5 OR #4
11. TS=(Mindfulness or "Mind-Body Therapies" or Meditation or Relaxation or "Relaxation Therapy")
12. TS="mindfulness based stress reduction"
13. TS=(mbsr\* or mbct\*)
14. #13 OR #12 OR #11
15. TS=("cognitive functional therapy" or CFT)
16. TS=("Health Education" or "Health Promotion" or Motivation)
17. TS=(coach NEAR (health or wellness or life-style or behav\*))
18. TS=(intervention\* NEAR (wellness or behav\*))
19. #18 OR #17 OR #16
20. TS=(Biofeedback or Feedback)
21. TS=(electromyograph\* or electromyogram\* or EMG\*)
22. #21 OR #20
23. TS=("pain neuroscience education" or "pain education" or "neuroscience education" or "pain physiology education" or "neuro-physiology education" or "therapeutic education")
24. TS=(counseling or "supportive psychotherap\*")
25. #24 OR #23 OR #22 OR #19 OR #15 OR #14 OR #10
26. #25 AND #3
27. TS=("random\* controlled trial" or "clinical trial" or "random allocation" or "controlled clinical trial")
28. TS=(random\* near trial)
29. #28 OR #27
30. #29 AND #26

### Database: SCOPUS

( TITLE-ABS-KEY ( "back pain" OR "low back pain" OR "back ache" OR "lumbar pain" OR lumbago OR dorsalgia OR "spinal pain" OR "vertebral pain" OR "lumbar spine" ) ) AND ( ( TITLE-ABS-KEY ( "Behav\* Therapy" OR "Cognitive Therapy" OR "Operant Conditioning" OR "Reinforcement" OR "psychological intervention" OR "psychological therapy" OR "cognitiv\* treatment\*" OR "cognitiv\* intervention\*" OR "behav\* treatment\*" OR "behav\* intervention\*" OR "behav\* techniqu\*" OR "behav\* modif\*" OR "behav\* change\*" OR "graded exposure" OR desensiti\* OR imagery OR "goal setting" OR "acceptance and commitment therapy" OR cbt ) ) OR ( TITLE-ABS-KEY ( mindfulness OR "Mind-Body Therapies" OR meditation OR relaxation OR "Relaxation Therapy" OR "mindfulness based stress reduction\*" OR mbsr OR mbct ) ) ) OR ( TITLE-ABS-KEY



("cognitive functional therapy" OR cft)) OR ( TITLE-ABS-KEY ("Health Education" OR "Health Promotion" OR motivation OR "health coach\*" OR "wellness coach\*" OR "lifestyle coach\*" OR "behav\* coach\*" OR "wellness intervention\*" OR "behav\* intervention\*" ) ) OR ( TITLE-ABS-KEY ("pain neuroscience education" OR "pain education" OR "neuroscience education" OR "pain physiology education" OR "neurophysiology education" OR "therapeutic education" ) ) OR ( TITLE-ABS-KEY ( counseling OR "supportive psychotherap\*" ) ) ) AND ( TITLE-ABS-KEY ( "Random\* controlled trial" OR "Clinical Trial" OR "Random allocation" OR "Controlled clinical trial" OR "random\* trial" ) ) )

**Database: Ovid PsycINFO**

1. exp Back Pain/
2. (back pain or low back pain or lumbar pain or lumbago or dorsalgia or spinal pain or vertebral pain or backache or lumbar spine).ti,ab.
3. 1 or 2
4. exp Cognitive Behavior Therapy/ or exp Cognitive Therapy/ or exp operant conditioning/ or exp negative reinforcement/ or exp positive reinforcement/ or behaviour change/
5. (cognitive behavior?ral therapy or cognitive therap\* or operant conditioning or negative reinforcement or positive reinforcement or psychological intervention or psychological therap\*).ab,ti.
6. (cognitiv\* adj1 (treatment\* or intervention\*)).ab,ti.
7. (behavior?r\* adj1 (treatment\* or therap\* or intervention\* or techniqu\* or modif\* or change\*)).ab,ti.
8. (graded exposure or desensiti\* or imagery or goal setting).ab,ti.
9. ((acceptance and commitment therapy) or CBT).ab,ti.
10. 4 or 5 or 6 or 7 or 8 or 9
11. exp Mindfulness/ or exp Meditation/ or exp Relaxation/ or exp Relaxation Therapy
12. (mindfulness based stress reduction\*).ab,ti.
13. (mindfulness or meditation or relaxation or relaxation therap\* or mbsr\* or mbct\*).ab,ti.
14. 11 or 12 or 13
15. (cognitive functional therapy or CFT).ab,ti.
16. exp Health Education/ or exp Health Promotion/ or exp Life Coaching/ or exp Coaching Psychology/ or exp Motivation Training/
17. (health education or health promotion or life coaching or coaching psychology or motivation training wellness intervention\*).ab,ti.
18. ((health or wellness or behav\*) adj1 coach\*).ab,ti.
19. 16 or 17 or 18
20. exp Biofeedback, Psychology/ or exp Feedback, Psychological/
21. (bio-feedback training or biofeedback or electromyograph\* or electromyogram\* or EMG).ab,ti.
22. 20 or 21
23. (pain neuroscience education or pain education or neuroscience education or pain physiology education or neuro-physiology education or therapeutic education).ab,ti.
24. exp Counseling/ or exp Counseling Psychology/ or exp Group Counseling/ or exp Rehabilitation Counseling/ or exp Psychotherapeutic Counseling/

25. (counseling or counseling psychology or group counseling or rehabilitation counseling or psychotherapeutic counseling or supportive psychotherap\*).ab,ti.
26. 24 or 25
27. 10 or 14 or 15 or 19 or 22 or 23 or 26
28. 3 and 27
29. exp Randomized Controlled Trials/ or exp Clinical Trials/
30. (random\* adj3 trial\*).ab,ti.
31. (clinical trial or random allocation or controlled clinical trial).ab,ti.
32. 29 or 30 or 31
33. 28 and 32
34. limit 33 to humans

**Database: Cochrane Central Register of Controlled Trials**

1. exp Back Pain/ or exp Low Back Pain/
2. (back pain or low back pain or lumbar pain or lumbago or dorsalgia or spinal pain or vertebral pain or backache or lumbar spine).ti,ab.
3. 1 or 2
4. exp Behavior Therapy/ or exp Cognitive Therapy/ or \*Conditioning, Operant/ or exp "reinforcement (psychology)"/
5. (operant conditioning or reinforcement or psychological intervention or psychological therapy).ab,ti.
6. (cognitiv\* adj1 (treatment\* or therap\* or intervention\*)).ab,ti.
7. (behavio?r\* adj1 (treatment\* or therap\* or intervention\* or techniqu\* or modif\* or change\*)).ab,ti.
8. (graded exposure or desensiti\* or imagery or goal setting).ab,ti.
9. ((acceptance and commitment therapy) or CBT).ab,ti.
10. 4 or 5 or 6 or 7 or 8 or 9
11. exp Mindfulness/ or exp Meditation/ or exp Relaxation/ or exp Relaxation Therapy/
12. (mindfulness based stress reduction\* or mindfulness or meditation or relaxation or relaxation therap\* or mbsr\* or mbct\*).ab,ti.
13. 11 or 12
14. (cognitive functional therapy or CFT).ab,ti.
15. exp Health Education/ or exp Health Promotion/ or exp Motivation/
16. (health education or health promotion or motivation).ab,ti.
17. ((health or wellness or life-style or behav\*) adj1 coach\*).ab,ti.
18. ((wellness or behav\*) adj1 intervention\*).ab,ti.
19. 15 or 16 or 17 or 18
20. exp Biofeedback, Psychology/ or exp Feedback, Psychological/
21. (electromyograph\* or electromyogram\* or EMG\* or bio-feedback or feedback).ab,ti.
22. 20 or 21
23. (pain neuroscience education or pain education or neuroscience education or pain physiology education or neuro-physiology education or therapeutic education).ab,ti.
24. exp Counseling/ or exp Directive counseling/
25. (counseling or directive counseling or supportive psychotherap\*).ab,ti.
26. 24 or 25
27. 10 or 13 or 14 or 19 or 22 or 23 or 26
28. 3 and 27

29. exp Randomized controlled trial/ or \*Clinical Trial/ or \*Random allocation/ or exp Controlled clinical trial/
30. randomized controlled trial.pt.
31. (random\* adj3 trial).ab,ti.
32. (clinical trial or random allocation or controlled clinical trial).ab,ti.
33. 29 or 30 or 31 or 32
34. 28 and 33

**Database: CINAHL**

1. (MH "Low Back Pain") OR (MH "Back Pain+")
2. AB ("back pain" or "low back pain" or "lumbar pain" or lumbago or dorsalgia or "spinal pain" or "vertebral pain" or backache or "lumbar spine") OR TI ("back pain" or "low back pain" or "lumbar pain" or lumbago or dorsalgia or "spinal pain" or "vertebral pain" or backache or "lumbar spine")
3. S1 OR S2
4. (MH "Behavior Therapy") OR (MH "Cognitive Therapy") OR (MH "Reinforcement (Psychology)")
5. AB ("Reinforcement (Psychology)" OR "operant conditioning" OR "psychological intervention" OR "psychological therapy") OR TI ("Reinforcement (Psychology)" OR "operant conditioning" OR "psychological intervention" OR "psychological therapy")
6. AB (cognitiv\* N1 (treatment\* or therap\* or intervention\*)) OR TI (cognitiv\* N1 (treatment\* or therap\* or intervention\*))
7. AB (behavio?r\* N1 (treatment\* or therap\* or intervention\* or techniqu\* or modif\* or change\*)) OR TI (behavio?r\* N1 (treatment\* or therap\* or intervention\* or techniqu\* or modif\* or change\*))
8. AB ("graded exposure" or desensiti\* or imagery or "goal setting") OR TI ("graded exposure" or desensiti\* or imagery or "goal setting")
9. AB ("acceptance and commitment therapy" or CBT) OR TI ("acceptance and commitment therapy" or CBT)
10. S4 OR S5 OR S6 OR S7 OR S8 OR S9
11. (MH "Mindfulness") OR (MH "Mind Body Techniques") OR (MH "Relaxation") OR (MH "Relaxation Techniques")
12. AB ("mindfulness based stress reduction\*" or mindfulness or "mind body techniques" or relaxation or "relaxation therap\*" or "relaxation techniques" or mbsr\* or mbct\*) OR TI ("mindfulness based stress reduction\*" or mindfulness or "mind body techniques" or relaxation or "relaxation therap\*" or "relaxation techniques" or mbsr\* or mbct\*)
13. S11 OR S12
14. AB ("cognitive functional therapy" or CFT) or TI ("cognitive functional therapy" or CFT)
15. (MH "Health Education") OR (MH "Health Promotion") OR (MH "Motivation") OR (MH "Motivational Interviewing")
16. AB ("health education" or "health promotion" or motivation\* or "motivational interviewing") or TI ("health education" or "health promotion" or motivation\* or "motivational interviewing")
17. AB (coach\* N1 (health or wellness or life-style or behav\*)) OR TI (coach\* N1 (health or wellness or life-style or behav\*))
18. AB (intervention\* N1 (wellness or behav\*)) OR TI (intervention\* N1 (wellness or behav\*))

19. S15 OR S16 OR S17 OR S18
20. (MH "Biofeedback") OR (MH "Feedback")
21. AB (biofeedback or feedback or electromyograph\* or electromyogram\* or EMG\*) OR TI (biofeedback or feedback or electromyograph\* or electromyogram\* or EMG\*)
22. S20 OR S21
23. AB ("pain neuroscience education" or "pain education" or "neuroscience education" or "pain physiology education" or "neuro-physiology education" or "therapeutic education") OR TI ("pain neuroscience education" or "pain education" or "neuroscience education" or "pain physiology education" or "neuro-physiology education" or "therapeutic education")
24. (MH "Counseling+")
25. AB (counseling or "supportive psychotherap\*") OR TI (counseling or "supportive psychotherap\*")
26. S24 OR S25
27. S10 OR S13 OR S14 OR S19 OR S22 OR S23 OR S26
28. S3 AND S27
29. (MH "Randomized Controlled Trials+") OR (MH "Clinical Trials+") OR (MH "Random Assignment")
30. AB (random\* N3 trial) OR TI (random\* N3 trial)
31. AB ("clinical trial\*" or "random assignment" or "random allocation" or "controlled clinical trial") OR TI ("clinical trial\*" or "random assignment" or "random allocation" or "controlled clinical trial")
32. S29 OR S30 OR S31
33. S28 AND S32
34. S28 AND S32 (Limiters – Human)

## Supplementary B. Treatment node classification

The process for classifying the study interventions into treatment nodes occurred in 4 stages:

1. Initial treatment nodes classification
2. Adjustments to pre-specified treatment nodes
3. Re-coding of treatment nodes
4. Confirmation of final treatment node classification

### 1. Initial treatment nodes classification

Firstly, psychological, non-psychological co-interventions, and comparison interventions were classified into the pre-specified treatment nodes (Supplementary Table 1.1). The rationale and methodology for classifying the interventions into the pre-specified treatment nodes have been described in detail in the published protocol paper.[1] Examples of interventions or approaches which were classified into the respective treatment nodes have been described in the published protocol paper.[1] This process was conducted by EK-YH, with input from clinical experts from the review team (psychologists: CEA-J, physiotherapists: PHF).

**Supplementary Table 1.1** Initial treatment node classification

|                   |                                                |            |             |              |             |                 |                    |
|-------------------|------------------------------------------------|------------|-------------|--------------|-------------|-----------------|--------------------|
| Decision set      | Psychological intervention +/- co-intervention | BT         | CBT         | Mind         | Csl         | PE              | Comb psych         |
|                   |                                                | BT+Exs     | CBT+Exs     | Mind+Exs     | Csl+Exs     | PE+Exs          | Comb psych+Exs     |
|                   |                                                | BT+Passive | CBT+Passive | Mind+Passive | Csl+Passive | PE+Passive      | Comb psych+Passive |
|                   |                                                | BT+Physio  | CBT+Physio  | Mind+Physio  | Csl+Physio  | PE+Physio       | Comb psych+Physio  |
| Supplementary set | Comparison intervention                        | Physio     |             |              |             |                 |                    |
|                   |                                                | Exs        | Passive     | GP care      | Advice      | No intervention |                    |

Decision set - BT: behavioural therapy, BT+Exs: behavioural therapy delivered with exercise, BT+Passive: behavioural therapy delivered with passive treatment, BT+Physio: behavioural therapy delivered with physiotherapy, CBT: cognitive behavioural therapy, CBT+Exs: cognitive behavioural therapy delivered with exercise, CBT+Passive: cognitive behavioural therapy delivered with passive treatment, CBT+Physio: cognitive behavioural therapy delivered with physiotherapy, Comb psych: combined psychological approaches, Comb psych+Exs: combined psychological approaches delivered with exercise, Comb Psych+Passive: combined psychological approaches delivered with passive treatment, Comb Psych+Physio: combined psychological approaches delivered with physiotherapy, Csl: counselling, Csl+Exs: counselling delivered with exercise, Csl+Passive: counselling delivered with passive treatment, Csl+Physio: counselling delivered with physiotherapy, Mind: mindfulness, Mind+Exs: mindfulness delivered with exercise, Mind+Passive: mindfulness delivered with passive treatment, Mind+Physio: mindfulness delivered with physiotherapy, PE: pain education, PE+Exs: pain education delivered with exercise, PE+Passive: pain education delivered with passive treatment, PE+Physio: pain education delivered with physiotherapy, Physio: physiotherapy.

Supplementary set - Exs: exercise, GP care: general practitioner care, Passive: passive treatment.

## 2. Adjustments to pre-specified treatment nodes

After initial intervention coding was completed by EK-YH, clinical experts from the review team (psychologists: CEA-J, physiotherapists: PHF, MLF) were consulted to establish the appropriateness of lumping treatment nodes. For pragmatic reasons (i.e., provide a simpler framework from which study findings can be translated more easily into clinical practice), three comparison interventions (exercise, passive treatment, physiotherapy) were merged to form a single comparison node, *physiotherapy care*. For consistency, we also merged the three co-interventions (exercise, passive treatment, physiotherapy) into a singular co-intervention node, *physiotherapy care*. Finally, we added a supplementary comparison node, *usual care*, to classify usual care interventions which could not be accurately classified into the available comparison treatment nodes.

## 3. Re-coding of treatment nodes

EK-YH re-coded the treatment nodes according to the final framework presented below (see Supplementary Table 1.2). Descriptions of each treatment node have been summarised in Table 1 of the main paper, and in the published protocol paper.[1]

**Supplementary Table 1.2** Revised treatment node classification

|                   |                                                |         |        |                 |            |       |               |
|-------------------|------------------------------------------------|---------|--------|-----------------|------------|-------|---------------|
| Decision set      | Psychological intervention +/- co-intervention | BT      | CBT    | Mind            | Csl        | PE    | Comb psych    |
|                   |                                                | BT+PC   | CBT+PC | Mind+PC         | Csl+PC     | PE+PC | Comb psych+PC |
|                   | Comparison intervention                        | PC      |        |                 |            |       |               |
| Supplementary set | Comparison intervention                        | GP care | Advice | No intervention | Usual care |       |               |

Decision set - BT: behavioural therapy, BT+PC: behavioural therapy delivered with physiotherapy care, CBT: cognitive behavioural therapy, CBT+PC: cognitive behavioural therapy delivered with physiotherapy care, Comb psych: combined psychological approaches, Comb psych+PC: combined psychological approaches delivered with physiotherapy care, Csl: counselling, Csl+PC: counselling delivered with physiotherapy care, Mind: mindfulness, Mind+PC: mindfulness delivered with physiotherapy care, PE: pain education, PE+PC: pain education delivered with physiotherapy care, PC: physiotherapy care.

Supplementary set - GP care: general practitioner care.

## 4. Confirmation of final treatment node classification

Finally, CEA-J (clinical psychologist) confirmed the accuracy of classifying the psychological components of interventions, and JC, DXMW and PHF (physiotherapists) confirmed the accuracy of classifying non-psychological components of interventions prior to conducting statistical analyses.

### Supplementary C. Studies excluded at full text-level

- Aasa B, Berglund L, Michaelson P, Aasa U. Individualized low-load motor control exercises and education versus a high-load lifting exercise and education to improve activity, pain intensity, and physical performance in patients with low back pain: a randomized controlled trial. *J Orthop Sports Phys Ther.* 2015;45(2):77-85, b71-74.
- Aleksiev A, Kraev T. Postisometric Relaxation Versus High Velocity Low Amplitude Techniques in Low Back Pain. *J Orthop Med.* 2007;29(3):105-108.
- Alonso-Cardaño A, Hernaez-Martínez M, Marti-Auge P. Multimodal treatment of chronic low back pain: A music therapy program. *Rev Soc Esp Dolor.* 2008;15:228-233.
- Amaral DDV, Miyamoto GC, Franco KFM, et al. Examination of a Subgroup of Patients With Chronic Low Back Pain Likely to Benefit More From Pilates-Based Exercises Compared to an Educational Booklet. *J Orthop Sports Phys Ther.* 2020;50(4):189-197.
- Amirdelfan KHM, Tay B, Reddy S, et al. High-Frequency Impulse Therapy for Treatment of Chronic Back Pain: A Multicenter Randomized Controlled Pilot Study. *J Pain Res.* 2021;14:2991-2999.
- Amorim AB, Pappas E, Simic M, et al. Integrating Mobile-health, health coaching, and physical activity to reduce the burden of chronic low back pain trial (IMPACT): a pilot randomised controlled trial. *BMC Musculoskelet Disord.* 2019;20(1):71.
- Ardito RB, Pirro PS, Re TS, et al. Mindfulness-Based Stress Reduction Program on Chronic Low-Back Pain: A Study Investigating the Impact on Endocrine, Physical, and Psychologic Functioning. *J Altern Complement Med.* 2017;23(8):615-623.
- Ayanniyi O, Ige OG. Back care education on peasant farmers suffering from chronic mechanical low back pain. *J Exp Integr Med.* 5(4):215-221.
- Bailey J, Agarwal V, Zheng P, et al. Digital Care for Chronic Musculoskeletal Pain: 10,000 Participant Longitudinal Cohort Study. *J Med Internet Res.* 2020;22(5).
- Bair MJ, Outcalt SD, Slaven JE, et al. Care management for the effective use of opioids (CAMEO): A randomized trial. *Psychosom Med.* 2019;81(4):A149.
- Bandemer-Greulich U, Bosse B, Fikentscher E, Konzag TA, Bahrke U. Efficacy of psychological interventions on pain coping strategies in orthopedic rehabilitation of chronic low back pain. *Psychother Psychosom Med Psychol.* 2008;58(1):32-37.
- Banth S, Ardebil MD. Effectiveness of mindfulness meditation on pain and quality of life of patients with chronic low back pain. *Int J Yoga.* 2015;8(2):128-133.
- Basler HD, Jäkle C, Kröner-Herwig B. Incorporation of cognitive-behavioral treatment into the medical care of chronic low back patients: a controlled randomized study in German pain treatment centers. *Patient Educ Couns.* 1997;31(2):113-124.
- Basler HD, Bertalanffy H, Quint S, Wilke A, Wolf U. TTM-based counselling in physiotherapy does not contribute to an increase of adherence to activity recommendations in older adults with chronic low back pain--a randomised controlled trial. *Eur J Pain.* 2007;11(1):31-37.
- Baumeister H, Paganini S, Sander LB, Lin J, Schlicker S, Terhorst Y, Moshagen M, Bengel J, Lehr D, Ebert DD. Effectiveness of a Guided Internet- and Mobile-Based Intervention for Patients with Chronic Back Pain and Depression (WARD-BP): A Multicenter, Pragmatic Randomized Controlled Trial. *Psychother Psychosom.* 2021;90(4):255-268.
- Bello B, Aliyu FY, Awotidebe AW. Combined lumbar stabilization exercise with cognitive behavioral therapy gives no additional benefit for individuals with non-specific chronic low back pain. *Physiotherapy.* 2020;107:e155.
- Ben Salah Frih Z, Fendri Y, Jellad A, Boudoukhane S, Rejeb N. Efficacy and treatment compliance of a home-based rehabilitation programme for chronic low back pain: a randomized, controlled study. *Ann Phys Rehabil Med.* 2009;52(6):485-496.
- Ben-Ami N, Chodick G, Mirovsky Y, Pincus T, Shapiro Y. Increasing Recreational Physical Activity in Patients With Chronic Low Back Pain: A Pragmatic Controlled Clinical Trial. *J Orthop Sports Phys Ther.* 2017;47(2):57-66.

- Bendix T, Bendix AF, Busch E, Jordan A. Functional restoration in chronic low back pain. *Scand J Med Sci Sports*. 1996;6(2):88-97.
- Bendix AF, Bendix T, Lund C, Kirkbak S, Ostenfeld S. Comparison of three intensive programs for chronic low back pain patients: a prospective, randomized, observer-blinded study with one-year follow-up. *Scand J Rehabil Med*. 1997;29(2):81-89.
- Berlowitz J, Hall DL, Joyce C, et al. Changes in Perceived Stress After Yoga, Physical Therapy, and Education Interventions for Chronic Low Back Pain: A Secondary Analysis of a Randomized Controlled Trial. *Pain Med*. 2020;21(10):2529-2537.
- Berman BM, Singh BB. Chronic low back pain: an outcome analysis of a mind—body intervention. *Complement Ther Med*. 1997;5(1):29-35.
- Blake C, Garrett M. Impact of litigation on quality of life outcomes in patients with chronic low back pain. *Ir J Med Sci*. 1997;166(3):124-126.
- Brattberg G. Internet-based rehabilitation for individuals with chronic pain and burnout: a randomized trial. *Int J Rehabil Res*. 2006;29(3):221-227.
- Buhrman M, Fältenhag S, Ström L, Andersson G. Controlled trial of Internet-based treatment with telephone support for chronic back pain. *Pain*. 2004;111(3):368-377.
- Buhrman M, Nilsson-Ihrfeldt E, Jannert M, Ström L, Andersson G. Guided internet-based cognitive behavioural treatment for chronic back pain reduces pain catastrophizing: a randomized controlled trial. *J Rehabil Med*. 2011;43(6):500-505.
- Burns JW, Nielson WR, Jensen MP, Heapy A, Czlapski R, Kerns RD. Specific and general therapeutic mechanisms in cognitive behavioral treatment of chronic pain. *J Consult Clin Psychol*. 2015;83(1):1-11.
- Burton AK, Waddell G, Tillotson KM, Summerton N. Information and advice to patients with back pain can have a positive effect. A randomized controlled trial of a novel educational booklet in primary care. *Spine (Phila Pa 1976)*. 1999;24(23):2484-2491.
- Büssing A, Poier D, Ostermann T, Kröz M, Michalsen A. Treatment of Chronic Lower Back Pain: Study Protocol of a Comparative Effectiveness Study on Yoga, Eurythmy Therapy, and Physiotherapeutic Exercises. *Complement Med Res*. 2018;25(1):24-29.
- Carpenter KM, Stoner SA, Mundt JM, Stoelb B. An online self-help CBT intervention for chronic lower back pain. *Clin J Pain*. 2012;28(1):14-22.
- Castro MM, Daltro C, Kraychete DC, Lopes J. The cognitive behavioral therapy causes an improvement in quality of life in patients with chronic musculoskeletal pain. *Arq Neuropsiquiatr*. 2012;70(11):864-868.
- Çelenay Ş T, Kaya D, Özüdoğru A. Spinal postural training: Comparison of the postural and mobility effects of electrotherapy, exercise, biofeedback trainer in addition to postural education in university students. *J Back Musculoskelet Rehabil*. 2015;28(1):135-144.
- Chaléat-Valayer E, Denis A, Abelin-Genevois K, et al. Long-term effectiveness of an educational and physical intervention for preventing low-back pain recurrence: a randomized controlled trial. *Scand J Work Environ Health*. 2016;42(6):510-519.
- Chan AYP, Ford JJ, Surkitt LD, et al. Individualised functional restoration plus guideline-based advice vs advice alone for non-reducible discogenic low back pain: a randomised controlled trial. *Physiotherapy*. 2017;103(2):121-130.
- Chavez JL, Porucznik CA, Gren LH, et al. The Impact of Preoperative Mindfulness-Based Stress Reduction on Postoperative Outcomes in Lumbar Spine Degenerative Disease: 3-Month and 12-Month Results of a Pilot Study. *World Neurosurg*. 2020;139:e230-e236.
- Cherkin DC, Eisenberg D, Sherman KJ, et al. Randomized trial comparing traditional Chinese medical acupuncture, therapeutic massage, and self-care education for chronic low back pain. *Arch Intern Med*. 2001;161(8):1081-1088.
- Cherkin DC, Anderson ML, Sherman KJ, et al. Two-Year Follow-up of a Randomized Clinical Trial of Mindfulness-Based Stress Reduction vs Cognitive Behavioral Therapy or Usual Care for



- Chronic Low Back Pain. *JAMA*. 2017;317(6):642-644.
- Cohen MJ, Heinrich RL, Naliboff BD, Collins GA, Bonebakker AD. Group outpatient physical and behavioral therapy for chronic low back pain. *J Clin Psychol*. 1983;39(3):326-333.
- Coppack RJ, Kristensen J, Karageorghis CI. Use of a goal setting intervention to increase adherence to low back pain rehabilitation: a randomized controlled trial. *Clin Rehabil*. 2012;26(11):1032-1042.
- Corey DT, Koepfler LE, Etlin D, Day HI. A limited functional restoration program for injured workers: A randomized trial. *J Occup Rehabil*. 1996;6(4):239-249.
- Correia F, Nogueira A, Magalhães I, et al. Home-based Rehabilitation With A Novel Digital Biofeedback System versus Conventional In-person Rehabilitation after Total Knee Replacement: a feasibility study. *Scientific Reports*. 2018;8.
- Coudeyre E, Givron P, Vanbiervliet W, et al. The role of an information booklet or oral information about back pain in reducing disability and fear-avoidance beliefs among patients with subacute and chronic low back pain. A randomized controlled trial in a rehabilitation unit. *Ann Readapt Med Phys*. 2006;49(8):600-608.
- Dahl J, Wilson KG, Nilsson A. Acceptance and commitment therapy and the treatment of persons at risk for long-term disability resulting from stress and pain symptoms: A preliminary randomized trial. *Behav Ther*. 2004;35(4):785-801.
- Daltroy LH, Iversen MD, Larson MG, et al. Teaching and social support: effects on knowledge, attitudes, and behaviors to prevent low back injuries in industry. *Health Educ Q*. 1993;20(1):43-62.
- Davin S, Lapin B, Mijatovic D, et al. Comparative Effectiveness of an Interdisciplinary Pain Program for Chronic Low Back Pain, Compared to Physical Therapy Alone. *Spine (Phila Pa 1976)*. 2019;44(24):1715-1722.
- Day MA, Ehde DM, Burns J, et al. A randomized trial to examine the mechanisms of cognitive, behavioral and mindfulness-based psychosocial treatments for chronic pain: Study protocol. *Contemp Clin Trials*. 2020;93:106000.
- Day MA, Ward LC, Thorn BE, et al. Mechanisms of Mindfulness Meditation, Cognitive Therapy, and Mindfulness-based Cognitive Therapy for Chronic Low Back Pain. *Clin J Pain*. 2020;36(10):740-749.
- de Boer MJ, Versteegen GJ, Vermeulen KM, Sanderman R, Struys MM. A randomized controlled trial of an Internet-based cognitive-behavioural intervention for non-specific chronic pain: an effectiveness and cost-effectiveness study. *Eur J Pain*. 2014;18(10):1440-1451.
- Dear BF, Titov N, Perry KN, et al. The Pain Course: a randomised controlled trial of a clinician-guided Internet-delivered cognitive behaviour therapy program for managing chronic pain and emotional well-being. *Pain*. 2013;154(6):942-950.
- Dear BF, Gandy M, Karin E, et al. The Pain Course: 12- and 24-Month Outcomes From a Randomized Controlled Trial of an Internet-Delivered Pain Management Program Provided With Different Levels of Clinician Support. *J Pain*. 2018;19(12):1491-1503.
- Dejonghe LAL, Rudolf K, Becker J, Stassen G, Froboese I, Schaller A. Health coaching for promoting physical activity in low back pain patients: a secondary analysis on the usage and acceptance. *BMC Sports Sci Med Rehabil*. 2020;12:2.
- Demoulin C, Maquet D, Tomasella M, Croisier J-L, Crielaard J-M, Vanderthommen M. Benefits of a Physical Training Program After Back School for Chronic Low Back Pain Patients. *J Musculoskelet Pain*. 2006;14(2):21-31.
- Demoulin C, Grosdent S, Capron L, et al. Effectiveness of a semi-intensive multidisciplinary outpatient rehabilitation program in chronic low back pain. *Joint Bone Spine*. 2010;77(1):58-63.
- Domenech J PL, Rio ED, Garcia Palacios A, Herrero R, Ezzedine A, Botella C, Schmitt J, Alvarez-Llanas A, Banos R. EUROSPINE Meetings 2018: Abstracts, 19–21 September. *Eur Spine J*. 2018;27(5):579-624.

- Donaldson S, Romney D, Donaldson M, Skubick D. Randomized study of the application of single motor unit biofeedback training to chronic low back pain. *J Occup Rehabil.* 1994;4(1):23-37.
- Drks. Effectiveness of mindfulness meditation for low back pain: a randomized controlled trial. [Http://www.whoint/trialsearch/trial2.aspx? Trialid=drks00000373](http://www.whoint/trialsearch/trial2.aspx?Trialid=drks00000373). 2010.
- Eaton E, Swearingen HR, Zand Vakili A, Jones SR, Greenberg BD. A Brief Report on an 8-Week Course of Mindfulness-based Care for Chronic Pain in the Treatment of Veterans With Back Pain: Barriers Encountered to Treatment Engagement and Lessons Learned. *Med Care.* 2020;58 Suppl 2 9S:S94-s100.
- Edmond S, Driscoll M, Higgins D, et al. (301) Process of change in CBT for chronic pain: Examining skill practice and knowledge. *J Pain.* 2017;18(4):S50-S51.
- Eichler J, Rachinger-Adam B, Kraft E, Azad SC. Efficacy of biofeedback in patients with chronic low back pain : Impact on pain intensity, psychological factors and stress markers. *Schmerz.* 2019;33(6):539-548.
- Elkayam O, Ben Itzhak S, Avrahami E, et al. Multidisciplinary approach to chronic back pain: prognostic elements of the outcome. *Clin Exp Rheumatol.* 1996;14(3):281-288.
- Engbert K, Weber M. The effects of therapeutic climbing in patients with chronic low back pain: a randomized controlled study. *Spine (Phila Pa 1976).* 2011;36(11):842-849.
- Fisher LR, Alvar BA, Maher SF, Cleland JA. Short-term Effects of Thoracic Spine Thrust Manipulation, Exercise, and Education in Individuals With Low Back Pain: A Randomized Controlled Trial. *J Orthop Sports Phys Ther.* 2020;50(1):24-32.
- Fitzgerald K, Vaughan B, Fleischmann M, Pritchard S, Mulcahy J, Austin P. Utilisation of pain counselling in osteopathic practice: secondary analysis of a nationally representative sample of Australian osteopaths. *Scand J Pain.* 2020.
- Flink IK, Boersma K, Linton SJ. Changes in catastrophizing and depressed mood during and after early cognitive behaviorally oriented interventions for pain. *Cogn Behav Ther.* 2014;43(4):332-341.
- Flor H, Birbaumer N. Comparison of the efficacy of electromyographic biofeedback, cognitive-behavioral therapy, and conservative medical interventions in the treatment of chronic musculoskeletal pain. *J Consult Clin Psychol.* 1993;61(4):653-658.
- Fordham B, Ji C, Hansen Z, Lall R, Lamb SE. Explaining How Cognitive Behavioral Approaches Work for Low Back Pain: Mediation Analysis of the Back Skills Training Trial. *Spine (Phila Pa 1976).* 2017;42(17):E1031-e1039.
- Friedberg MW. Group cognitive behavioral treatment improves chronic low back pain in a cost-effective manner. *Journal of Clinical Outcomes Management.* 2010;17(6):7-9.
- Frost H, Lamb SE, Doll HA, Carver PT, Stewart-Brown S. Randomised controlled trial of physiotherapy compared with advice for low back pain. *BMJ.* 2004;329(7468):708.
- Gallagher L, McAuley J, Moseley GL. A randomized-controlled trial of using a book of metaphors to reconceptualize pain and decrease catastrophizing in people with chronic pain. *Clin J Pain.* 2013;29(1):20-25.
- Gandy M, Fogliati VJ, Terides MD, et al. Short message service prompts for skills practice in Internet-delivered cognitive behaviour therapy for chronic pain - are they feasible and effective? *Eur J Pain.* 2016;20(8):1288-1298.
- Gardner T, Refshauge K, McAuley J, Hübscher M, Goodall S, Smith L. Combined education and patient-led goal setting intervention reduced chronic low back pain disability and intensity at 12 months: a randomised controlled trial. *Br J Sports Med.* 2019;53(22):1424.
- Garland EL, Manusov EG, Froeliger B, Kelly A, Williams JM, Howard MO. Mindfulness-oriented recovery enhancement for chronic pain and prescription opioid misuse: results from an early-stage randomized controlled trial. *J Consult Clin Psychol.* 2014;82(3):448-459.
- Gaskell L, Enright S, Tyson S. The effects of a back rehabilitation programme for patients with chronic low back pain. *J Eval Clin Pract.* 2007;13(5):795-800.

- Genêt F, Poiraudau S, Revel M. Effectiveness and compliance to a center-based short rehabilitation program with a home-based program for chronic low back pain. *Ann Readapt Med Phys.* 2002;45(6):265-272.
- Geraghty AWA, Roberts LC, Stanford R, et al. Exploring Patients' Experiences of Internet-Based Self-Management Support for Low Back Pain in Primary Care. *Pain Med.* 2020;21(9):1806-1817.
- Ghadyani L, Tavafian SS, Kazemnejad A, Wagner J. Work-Related Low Back Pain Treatment: A Randomized Controlled Trial from Tehran, Iran, Comparing Multidisciplinary Educational Program versus Physiotherapy Education. *Asian Spine J.* 2016;10(4):690-696.
- Godfrey E, Holmes MG, Wileman V, et al. Physiotherapy informed by Acceptance and Commitment Therapy (PACT): protocol for a randomised controlled trial of PACT versus usual physiotherapy care for adults with chronic low back pain. *BMJ Open.* 2016;6(6), e011548.
- Godfrey E, Wileman V, Holmes MG, Norton S, Critchley D, McCracken L. Physiotherapy Informed by Acceptance and Commitment Therapy (Pact) : A Randomised Controlled Trial of Pact Versus Usual Care Physiotherapy for Adults with Chronic Low Back Pain. *Int J Behav Med.* 2018;25:S200-S200.
- Goffar SL. Tailored, multimedia versus traditional educational interventions for patients with low back pain: a randomized clinical trial. (University of Hawai'i) 2005; ph d 158 p. 2005
- Goossens ME, Rutten-Van Mólken MP, Kole-Snijders AM, Vlaeyen JW, Van Breukelen G, Leidl R. Health economic assessment of behavioural rehabilitation in chronic low back pain: a randomised clinical trial. *Health Econ.* 1998;7(1):39-51.
- Grande-Alonso M, Garrigos-Pedron M, Cuenca-Martinez F, et al. Influence of the Generation of Motor Mental Images on Physiotherapy Treatment in Patients with Chronic Low Back Pain. *Pain Physician.* 2020;23(4):E399-e408.
- Gremeaux V, Benaïm C, Poiraudau S, Hérisson C, Dupeyron A, Coudeyre E. Evaluation of the benefits of low back pain patients' education workshops during spa therapy. *Jt Bone Spine.* 2013;80(1):82-87.
- Gül H, Erel S, Toraman NF. Physiotherapy combined with therapeutic neuroscience education versus physiotherapy alone for patients with chronic low back pain: A pilot, randomized-controlled trial. *Turk J Phys Med Rehabil.* 2021;67(3):283-290
- Hampel P, Graef T, Krohn-Grimberghe B, Tlach L. Effects of gender and cognitive-behavioral management of depressive symptoms on rehabilitation outcome among inpatient orthopedic patients with chronic low back pain: a 1 year longitudinal study. *Eur Spine J.* 2009;18(12):1867-1880.
- Hampel P, Köpnick A, Roch S. Psychological and work-related outcomes after inpatient multidisciplinary rehabilitation of chronic low back pain: a prospective randomized controlled trial. *BMC Psychol.* 2019;7(1):6.
- Hazard RG, Reid S, Haugh LD, McFarlane G. A controlled trial of an educational pamphlet to prevent disability after occupational low back injury. *Spine (Phila Pa 1976).* 2000;25(11):1419-1423.
- Heapy AA, Higgins DM, Goulet JL, et al. Interactive Voice Response-Based Self-management for Chronic Back Pain: The COPES Noninferiority Randomized Trial. *JAMA Intern Med.* 2017;177(6):765-773.
- Heinrich RL, Cohen MJ, Naliboff BD, Collins GA, Bonebakker AD. Comparing physical and behavior therapy for chronic low back pain on physical abilities, psychological distress, and patients' perceptions. *J Behav Med.* 1985;8(1):61-78.
- Heinrich J, Anema JR, de Vroome EM, Blatter BM. Effectiveness of physical training for self-employed persons with musculoskeletal disorders: a randomized controlled trial. *BMC Public Health.* 2009;9:200.
- Holopainen R, Vuoskoski P, Piirainen A, Karppinen J, O'Sullivan P. Patients' conceptions of

- undergoing physiotherapy for persistent low back pain delivered in Finnish primary healthcare by physiotherapists who had participated in brief training in cognitive functional therapy. *Disabil Rehabil.* 2020;1-12.
- Hüppe A, Zeuner C, Karstens S, Hochheim M, Wunderlich M, Raspe H. Feasibility and long-term efficacy of a proactive health program in the treatment of chronic back pain: a randomized controlled trial. *BMC Health Serv Res.* 2019;19(1):714.
- Iles R. A Randomized Controlled Trial of Telephone Coaching for Return to Usual Activity in Low Back Pain. *Spine J.* 2011;11(10, Supplement):S62.
- Iles R, Taylor NF, Davidson M, O'Halloran P. Telephone coaching can increase activity levels for people with non-chronic low back pain: a randomised trial. *J Physiother.* 2011;57(4):231-238.
- Irvine AB, Russell H, Manocchia M, et al. Mobile-Web app to self-manage low back pain: randomized controlled trial. *J Med Internet Res.* 2015;17(1):e1.
- Isrctn. Effectiveness of tailored pain management in patients with chronic back pain. Effectiveness of tailored pain management in subgroups according to the three-cluster solution of the multidimensional pain inventory (MPI) in patients with chronic back pain in an inpatient rehabilitation setting: a randomised controlled trial. 2009.
- Jousset N, Fanello S, Bontoux L, et al. Effects of functional restoration versus 3 hours per week physical therapy: a randomized controlled study. *Spine (Phila Pa 1976).* 2004;29(5):487-493; discussion 494.
- Jprn U. Development and Effectiveness of Self-management App for low back pain - Randomized controlled trial. <http://www.who.int/trialssearch/Trial2.aspx?TrialID=JPRN-UMIN000034895>. 2018.
- Keel PJ, Wittig R, Deutschmann R, et al. Effectiveness of in-patient rehabilitation for sub-chronic and chronic low back pain by an integrative group treatment program (Swiss Multicentre Study). *Scand J Rehabil Med.* 1998;30(4):211-219.
- Kent P, Sullivan P, Smith A, et al. RESTORE—Cognitive functional therapy with or without movement sensor biofeedback versus usual care for chronic, disabling low back pain: study protocol for a randomised controlled trial. *BMJ Open.* 2019;9(8):e031133.
- Kgxy RBR. Effect of Neuroscience Education in Pain combined to Pilates in Catastrophization for Elderly with non-specific Chronic Low Back Pain: a Randomized Controlled Trial. *Pain Neuroscience Education for the older people with chronic low back pain: randomized controlled trial.* 2019.
- Klaber Moffett J, Jackson DA, Gardiner ED, et al. Randomized trial of two physiotherapy interventions for primary care neck and back pain patients: 'McKenzie' vs brief physiotherapy pain management. *Rheumatology.* 2006;45(12):1514-21.
- Knox CR, Lall R, Hansen Z, Lamb SE. Treatment compliance and effectiveness of a cognitive behavioural intervention for low back pain: a complier average causal effect approach to the BeST data set. *BMC Musculoskelet Disord.* 2014;15:17.
- Kohns DJ, Urbanik CP, Geisser ME, Schubiner H, Lumley MA. The Effects of a Pain Psychology and Neuroscience Self-Evaluation Internet Intervention: A Randomized Controlled Trial. *Clin J Pain.* 2020;36(9):683-692.
- Kole-Snijders AM, Vlaeyen JW, Goossens ME, et al. Chronic low-back pain: what does cognitive coping skills training add to operant behavioral treatment? Results of a randomized clinical trial. *J Consult Clin Psychol.* 1999;67(6):931-944.
- Kovacs F, Abaira V, Santos S, et al. A comparison of two short education programs for improving low back pain-related disability in the elderly: a cluster randomized controlled trial. *Spine (Phila Pa 1976).* 2007;32(10):1053-1059.
- Kulich W, Bernatzky G, Hesse HP, Wendtner F, Likar R, Klein G. Musiktherapie—Wirkung auf Schmerz, Schlaf und Lebensqualität bei Low back pain. *Wiener Medizinische Wochenschrift.* 2003;153(9-10):217-21.

- La Touche R, Sánchez-Vázquez M, Cuenca-Martínez F, Prieto-Aldana M, Paris-Alemany A, Navarro-Fernández G. Instruction Modes for Motor Control Skills Acquisition: A Randomized Controlled Trial. *J Mot Behav*. 2020;52(4):444-455.
- Lee TL, Sherman KJ, Hawkes RJ, Phelan EA, Turner JA. The Benefits of T'ai Chi for Older Adults with Chronic Back Pain: A Qualitative Study. *J Altern Complement Med*. 2020;26(6):456-462.
- Leon L, Jover JA, Alcázar L, Santamaría E, Pérez Nieto M, Delgado M. Functional recovery in low back pain: Efficacy of an early cognitive behavioral intervention. *Trauma*. 2009;20:23-28.
- Leonhardt C, Keller S, Chenot JF, et al. TTM-based motivational counselling does not increase physical activity of low back pain patients in a primary care setting--A cluster-randomized controlled trial. *Patient Educ Couns*. 2008;70(1):50-60.
- Lindell O, Johansson SE, Strender LE. Subacute and chronic, non-specific back and neck pain: cognitive-behavioural rehabilitation versus primary care. A randomized controlled trial. *BMC Musculoskelet Disord*. 2008;9:172.
- Linden M, Scherbe S, Cicholas B. Randomized controlled trial on the effectiveness of cognitive behavior group therapy in chronic back pain patients. *J Back Musculoskelet Rehabil*. 2014;27(4):563-568.
- Linton SJ, Nordin E. A 5-year follow-up evaluation of the health and economic consequences of an early cognitive behavioral intervention for back pain: a randomized, controlled trial. *Spine (Phila Pa 1976)*. 2006;31(8):853-858.
- Little P, Lewith G, Webley F, et al. Randomised controlled trial of Alexander technique lessons, exercise, and massage (ATEAM) for chronic and recurrent back pain. *BMJ*. 2008;337:a884.
- Løchting I, Storheim K, Werner EL, Småstuen Cvancarova M, Grotle M. Evaluation of individualized quality of life and illness perceptions in low back pain. A patient education cluster randomized controlled trial. *Patient Educ Couns*. 2016;99(12):1992-1998.
- Löffler A, Trojan J, Zieglgänsberger W, Diers M. Visually induced analgesia during massage treatment in chronic back pain patients. *Eur J Pain*. 2017;21(10):1623-1631.
- Lønn JH, Glomsrød B, Soukup MG, Bø K, Larsen S. Active back school: prophylactic management for low back pain. A randomized, controlled, 1-year follow-up study. *Spine (Phila Pa 1976)*. 1999;24(9):865-871.
- Lotzke H, Brisby H, Gutke A, et al. A Person-Centered Prehabilitation Program Based on Cognitive-Behavioral Physical Therapy for Patients Scheduled for Lumbar Fusion Surgery: A Randomized Controlled Trial. *Phys Ther*. 2019;99(8):1069-1088.
- Louw A, Farrell K, Choffin B, et al. Immediate effect of pain neuroscience education for recent onset low back pain: an exploratory single arm trial. *J Man Manip Ther*. 2019;27(5):267-276.
- Maaoui R, Khezami A, Ksibi I, et al. Therapeutic education in the management of fears and beliefs in patients with chronic low back pain. *Ann Rheum Dis*. 2017;76(Suppl 2):998.
- Magalhães MO, Muzi LH, Comachio J, et al. The short-term effects of graded activity versus physiotherapy in patients with chronic low back pain: A randomized controlled trial. *Man Ther*. 2015;20(4):603-609.
- Magklara A, Evangelopoulos D, Nicolopoulos K, Chrousos G, Darviri C. Stress management programs in chronic low back pain: Randomized controlled trial. *Arch Hell Med*. 2015;32:583-591.
- Magnussen LH, Strand LI, Skouen JS, Eriksen HR. Long-term follow-up of disability pensioners having musculoskeletal disorders. *BMC Public Health*. 2009;9(1):407.
- Malfliet A, Kregel J, Coppeters I, De Pauw R, et al. Effect of Pain Neuroscience Education Combined With Cognition-Targeted Motor Control Training on Chronic Spinal Pain: A Randomized Clinical Trial. *JAMA Neurol*. 2018;75(7):808-817.
- Malfliet A, Kregel J, Meeus M, Danneels L, Cagnie B, Roussel N, Nijs J. Patients With Chronic Spinal Pain Benefit From Pain Neuroscience Education Regardless the Self-Reported Signs of Central Sensitization: Secondary Analysis of a Randomized Controlled Multicenter Trial. *PM R*.

- 2018;10(12):1330-1343.e1331.
- Malfliet A, Bilterys T, Van Looveren E, et al. The added value of cognitive behavioral therapy for insomnia to current best evidence physical therapy for chronic spinal pain: protocol of a randomized controlled clinical trial. *Braz J Phys Ther.* 2019;23(1):62-70.
- Mangels M, Schwarz S, Worringer U, Holme M, Rief W. Evaluation of a behavioral-medical inpatient rehabilitation treatment including booster sessions: a randomized controlled study. *Clin J Pain.* 2009;25(5):356-364.
- McCauley JD, Thelen MH, Frank RG, Willard RR, Callen KE. Hypnosis compared to relaxation in the outpatient management of chronic low back pain. *Arch Phys Med Rehabil.* 1983;64(11):548-552.
- Mitchell RI, Carmen GM. The functional restoration approach to the treatment of chronic pain in patients with soft tissue and back injuries. *Spine (Phila Pa 1976).* 1994;19(6):633-642.
- Miyamoto GC, Costa LO, Galvanin T, Cabral CM. Efficacy of the addition of modified Pilates exercises to a minimal intervention in patients with chronic low back pain: a randomized controlled trial. *Phys Ther.* 2013;93(3):310-320.
- Moessner M, Aufdermauer N, Baier C, et al. Efficacy of an internet-delivered aftercare program for patients with chronic back pain. *Psychother Psychosom Med Psychol.* 2014;64(2):47-53.
- Monticone M, Montironi C, Tomba A, Righini C, Nido N, Giovanazzi E. Effectiveness of a rehabilitation and occupational behavioral cognitive group intervention for chronic low back pain with low disability. Prospective study with a 6-month follow-up. *G Ital Med Lav Ergon.* 2008;30(2):162-168.
- Morone G, Paolucci T, Alcuri MR, et al. Quality of life improved by multidisciplinary back school program in patients with chronic non-specific low back pain: a single blind randomized controlled trial. *Eur J Phys Rehabil Med.* 2011;47(4):533-541.
- Murray A, Hall AM, Williams GC, et al. Effect of a self-determination theory-based communication skills training program on physiotherapists' psychological support for their patients with chronic low back pain: a randomized controlled trial. *Arch Phys Med Rehabil.* 2015;96(5):809-816.
- Nct. Effect of an Outpatient Intervention Program in Patients With Chronic Back or Neck Pain. The Long-term Effect of an Outpatient Intervention Program With a Behavioral Therapy Approach in Patients With Chronic Back or Neck Pain With a Focus on Psychosocial Aspects. 2013.
- Nct. Efficacy of Education on Neurophysiology of Pain Combined to Hypnosis in Patients With Chronic Low Back Pain. Efficacy of Education on Neurophysiology of Pain Combined to Hypnosis in Patients With Chronic Low Back Pain. 2015.
- Nct. Pain Neuroscience Education and Physical Exercise Program in Chronic Back Pain. Pain Neuroscience Education and Physical Exercise Program in Patients With Chronic Back Pain Intervention From Primary Care Physiotherapy Units. 2018.
- Nct. The Effectiveness of Two Different Feedbacks in Core Stabilization Education for Chronic Nonspecific Low Back Pain. The Comparison of the Effects of Two Different Feedback in the Core Stabilization Training for Patients With Chronic Nonspecific Low Back Pain (CNLBP): randomized Parallel Group Trial. 2017.
- Nees TA, Riewe E, Waschke D, Schiltenswolf M, Neubauer E, Wang H. Multidisciplinary Pain Management of Chronic Back Pain: Helpful Treatments from the Patients' Perspective. *J Clin Med.* 2020;9(1):145.
- Newton-John TR, Spence SH, Schotte D. Cognitive-behavioural therapy versus EMG biofeedback in the treatment of chronic low back pain. *Behav Res Ther.* 1995;33(6):691-697.
- Nicholas MK, Wilson PH, Goyen J. Comparison of cognitive-behavioral group treatment and an alternative non-psychological treatment for chronic low back pain. *Pain.* 1992;48(3):339-347.
- Nicholas MK, Asghari A, Blyth FM, et al. Self-management intervention for chronic pain in older adults: a randomised controlled trial. *Pain.* 2013;154(6):824-835.
- O'Neill A, O'Sullivan K, O'Sullivan P, Purtill H, O'Keefe M. Examining what factors mediate

- treatment effect in chronic low back pain: A mediation analysis of a Cognitive Functional Therapy clinical trial. *Eur J Pain*. 2020;24(9):1765-1774.
- Onac I, Moldovan A, Onac I, Igna R, Pop L. Medication, physiotherapy and cognitive behavior therapy for the treatment of chronic back pain: A clinical trial. *J Cognitive and Behavioral Psychotherapies*. 2012;12:23-37.
- Ostelo R. Soft tissue manipulation, exercise and education improve pain and disability in patients with non-specific low back pain. *Aust J Physiother*. 2000;46(4), 316.
- Özcan NT, Çalık BB, Kabul EG. The Effectiveness of Matrix Rhythm Therapy in Patients with Chronic Low Back Pain. *Spine (Phila Pa 1976)*. 2021;46(12):781-787.
- Paolucci T, Morone G, Iosa M, et al. Psychological features and outcomes of the Back School treatment in patients with chronic non-specific low back pain. A randomized controlled study. *Eur J Phys Rehabil Med*. 2012;48(2):245-253.
- Penttinen J, Nevala-Puranen N, Airaksinen O, Jääskeläinen M, Sintonen H, Takala J. Randomized controlled trial of back school with and without peer support. *J Occup Rehabil*. 2002;12(1):21-29.
- Pires D, Caeiro C, Cruz E. Individual patient responder analysis of the effectiveness of a pain neuroscience education programme in chronic low back pain *Manual Ther*. 2016;25:e130
- Rabenbauer LM, Mevenkamp N. Factors in the Effectiveness of e-Health Interventions for Chronic Back Pain: How Self-Efficacy Mediates e-Health Literacy and Healthy Habits. *Telemed J E Health*. 2021;27(2):184-192.
- Rahimian Boogar I, Tabatabaeian M. Effect of cognitive-behavioral group therapy on depression of the patients with chronic low back pain: A 4-months follow up. *Koomesh*. 2012;13:209-217.
- Ramke S, Sharpe L, Newton-John T. Adjunctive cognitive behavioural treatment for chronic pain couples improves marital satisfaction but not pain management outcomes. *Eur J Pain*. 2016;20(10):1667-1677.
- Rantonen J, Vehtari A, Karppinen J, et al. Face-to-face information combined with a booklet versus a booklet alone for treatment of mild low-back pain: a randomized controlled trial. *Scand J Work Environ Health*. 2014;40(2):156-166.
- Rasmussen CDN, Holtermann A, Bay H, Søgaard K, Birk Jørgensen M. A multifaceted workplace intervention for low back pain in nurses' aides: a pragmatic stepped wedge cluster randomised controlled trial. *Pain*. 2015;156(9):1786-1794.
- Ree E, Lie SA, Eriksen HR, et al. Reduction in sick leave by a workplace educational low back pain intervention: A cluster randomized controlled trial. *Scand J Public Health*. 2016;44(6):571-579.
- Ribeiro LH, Jennings F, Jones A, Furtado R, Natour J. Effectiveness of a back school program in low back pain. *Clin Exp Rheumatol*. 2008;26(1):81-88.
- Riecke J, Rief W, Vlaeyen J, Glombiewski J. Generalizability of harm and pain expectations after exposure in chronic low back pain patients. *Eur J Pain*. 2020;24:1-10.
- Riva S, Camerini AL, Allam A, Schulz PJ. Interactive sections of an Internet-based intervention increase empowerment of chronic back pain patients: randomized controlled trial. *J Med Internet Res*. 2014;16(8):e180.
- Robbins J, Heneghan NR. Cognitively informed exercise and educational group in patients with persistent low back pain: a service evaluation. *Physiother*. 2019;105:e54-e55.
- Robson EK, Kamper SJ, Davidson S, et al. Healthy Lifestyle Program (HeLP) for low back pain: protocol for a randomised controlled trial. *BMJ Open*. 2019;9(9):e029290.
- Roland M, Dixon M. Randomized controlled trial of an educational booklet for patients presenting with back pain in general practice. *J R Coll Gen Pract*. 1989;39(323):244-246.
- Roseen EJ, Gerlovin H, Femia A, et al. Yoga, physical therapy, and back pain education for sleep quality in low-income racially diverse adults with chronic low back pain: A secondary analysis of a randomized controlled trial. *J Gen Intern Med*. 2020;35(1):167-76.
- Rutledge T, Atkinson JH, Holloway R, et al. Randomized Controlled Trial of Nurse-Delivered

- Cognitive-Behavioral Therapy Versus Supportive Psychotherapy Telehealth Interventions for Chronic Back Pain. *J Pain*. 2018;19(9):1033-1039.
- Saarijärvi S. A controlled study of couple therapy in chronic low back pain patients. Effects on marital satisfaction, psychological distress and health attitudes. *J Psychosom Res*. 1991;35(2-3):265-272.
- Sahin N, Albayrak I, Durmus B, Ugurlu H. Effectiveness of back school for treatment of pain and functional disability in patients with chronic low back pain: a randomized controlled trial. *J Rehabil Med*. 2011;43(3):224-229.
- Samwel HJ, Kraaimaat FW, Crul BJ, van Dongen RD, Evers AW. Multidisciplinary allocation of chronic pain treatment: effects and cognitive-behavioural predictors of outcome. *Br J Health Psychol*. 2009;14(Pt 3):405-421.
- Sanabria-Mazo JP, Forero CG, Cristobal-Narváez P, et al. Efficacy, cost-utility and physiological effects of Acceptance and Commitment Therapy (ACT) and Behavioural Activation Treatment for Depression (BATD) in patients with chronic low back pain and depression: study protocol of a randomised, controlled trial including mobile-technology-based ecological momentary assessment (IMPACT study). *BMJ Open*. 2020;10(7):e038107.
- Sanderson KB, Roditi D, George SZ, Atchison JW, Banou E, Robinson ME. Investigating patient expectations and treatment outcome in a chronic low back pain population. *J Pain Res*. 2012;5:15-22.
- Saracoglu I, Aksoy CC, Afsar E, Arik MI. Does pain neuroscience education improve pain knowledge, beliefs and attitudes in undergraduate physiotherapy students? *Physiother Res Int*. 2021;26(2):e1898.
- Schaller A, Petrowski K, Pfoertner TK, Froboese I. Effectiveness of a theory-based multicomponent intervention (Movement Coaching) on the promotion of total and domain-specific physical activity: a randomised controlled trial in low back pain patients. *BMC Musculoskelet Disord*. 2017;18(1):431.
- Schemer L, Schroeder A, Ørnbøl E, Glombiewski JA. Exposure and cognitive-behavioural therapy for chronic back pain: An RCT on treatment processes. *Eur J Pain*. 2019;23(3):526-538.
- Senlöv P, Denison E, Lindberg P. Long-term follow-up of tailored behavioural treatment and exercise based physical therapy in persistent musculoskeletal pain: A randomized controlled trial in primary care. *Eur J Pain*. 2009;13(10):1080-1088.
- Sharma S, Jensen MP, Moseley GL, Abbott JH. Results of a feasibility randomised clinical trial on pain education for low back pain in Nepal: the Pain Education in Nepal-Low Back Pain (PEN-LBP) feasibility trial. *BMJ Open*. 2019;9(3):e026874.
- Sherman KJ, Cherkin DC, Erro J, Miglioretti DL, Deyo RA. Comparing yoga, exercise, and a self-care book for chronic low back pain: a randomized, controlled trial. *Ann Intern Med*. 2005;143(12):849-856.
- Shpaner M, Kelly C, Lieberman G, et al. Unlearning chronic pain: A randomized controlled trial to investigate changes in intrinsic brain connectivity following Cognitive Behavioral Therapy. *Neuroimage Clin*. 2014;5:365-376.
- Silva T, Silva N, Rocha S, et al. Back school program for back pain: education or physical exercise? *ConScientiae Saúde*. 2014;13.
- Simula AS, Jenkins HJ, Holopainen R, et al. Transcultural adaption and preliminary evaluation of “understanding low back pain” patient education booklet. *BMC Health Services Research*. 2019;19(1):1010.
- Smeets RJ, Vlaeyen JW, Hidding A, et al. Active rehabilitation for chronic low back pain: cognitive-behavioral, physical, or both? First direct post-treatment results from a randomized controlled trial [ISRCTN22714229]. *BMC Musculoskelet Disord*. 2006;7:5.
- Smeets RJ, Vlaeyen JW, Kester AD, Knottnerus JA. Reduction of pain catastrophizing mediates the outcome of both physical and cognitive-behavioral treatment in chronic low back pain. *J Pain*.



- 2006;7(4):261-271.
- Sobie TJ. Body schema acuity training and Feldenkrais RTM movements compared to core stabilization biofeedback and motor control exercises: comparative effects on chronic non-specific low back pain in an outpatient clinical setting: a randomized controlled comparative efficacy study. *Dissertation abstracts international: Section B: the Sciences and Engineering*. 2018.
- Solar C, Halat AM, MacLean RR, et al. Predictors of engagement in an internet-based cognitive behavioral therapy program for veterans with chronic low back pain. *Transl Behav Med*. 2021;11(6):1274-1282.
- Soukup MG, Glomsröd B, Lönn JH, Bö K, Larsen S. The effect of a Mensendieck exercise program as secondary prophylaxis for recurrent low back pain. A randomized, controlled trial with 12-month follow-up. *Spine (Phila Pa 1976)*. 1999;24(15):1585-1591; discussion 1592.
- Staal JB, Hlobil H, Twisk JW, Smid T, Köke AJ, van Mechelen W. Graded activity for low back pain in occupational health care: a randomized, controlled trial. *Ann Intern Med*. 2004;140(2):77-84.
- Steenstra IA, Anema JR, Bongers PM, de Vet HC, Knol DL, van Mechelen W. The effectiveness of graded activity for low back pain in occupational healthcare. *Occup Environ Med*. 2006;63(11):718-725.
- Stevens ML, Boyle E, Hartvigsen J, et al. Mechanisms for reducing low back pain: a mediation analysis of a multifaceted intervention in workers in elderly care. *Int Arch Occup Environ Health*. 2019;92(1):49-58.
- Storrø S, Moen J, Svebak S. Effects on sick-leave of a multidisciplinary rehabilitation programme for chronic low back, neck or shoulder pain: comparison with usual treatment. *J Rehabil Med*. 2004;36(1):12-16.
- Suni JH, Kolu P, Tokola K, et al. Effectiveness and cost-effectiveness of neuromuscular exercise and back care counseling in female healthcare workers with recurrent non-specific low back pain: a blinded four-arm randomized controlled trial. *BMC Public Health*. 2018;18(1):1376.
- Taulaniemi A, Kankaanpää M, Tokola K, Parkkari J, Suni JH. Neuromuscular exercise reduces low back pain intensity and improves physical functioning in nursing duties among female healthcare workers; secondary analysis of a randomised controlled trial. *BMC Musculoskelet Disord*. 2019;20(1):328.
- Thanawat T, Nualnetr N. Effects of Transtheoretical Model-based intervention on physical function of rice farmers with chronic low back pain: a randomized controlled trial. *Physiother*. 2015;101:e1505-e1506.
- Thanawat T, Nualnetr N. Effects of an intervention based on the Transtheoretical Model on back muscle endurance, physical function and pain in rice farmers with chronic low back pain. *J Back Musculoskelet Rehabil*. 2017;30(4):847-856.
- Thorsell J, Finnes A, Dahl J, et al. A comparative study of 2 manual-based self-help interventions, acceptance and commitment therapy and applied relaxation, for persons with chronic pain. *Clin J Pain*. 2011;27(8):716-723.
- Toelle TR, Utpadel-Fischler DA, Haas KK, Priebe JA. App-based multidisciplinary back pain treatment versus combined physiotherapy plus online education: a randomized controlled trial. *NPJ Digit Med*. 2019;2(1),1-9.
- Tonga E, Daskapan A, Düger T, Özünlü N. Effects of different back health education on fear avoidance belief and occupational performance in chronic low back pain. *Fizyoterapi Rehabilitasyon*. 2012;23:17-25.
- Trapp W, Weinberger M, Erk S, et al. A brief intervention utilising visual feedback reduces pain and enhances tactile acuity in CLBP patients. *J Back Musculoskelet Rehabil*. 2015;28(4):651-660.
- Underwood M, Mistry D, Lall R, Lamb S. Predicting Response to a Cognitive-Behavioral Approach to Treating Low Back Pain: Secondary Analysis of the BeST Data Set. *Arthritis Care Res*. 2011;63:1271-1279.

- van Erp RMA, Huijnen IPJ, Köke AJA, Verbunt JA, Smeets RJEM. Feasibility of the biopsychosocial primary care intervention 'Back on Track' for patients with chronic low back pain: a process and effect-evaluation. *Eur J Physiother.* 2020:1-11.
- Vandermost M, Sterling M, Bagraith KS, Kennedy H, Doherty D, Kilner S. Can an allied health expanded scope Treatment Access Pathway (TAP) improve health outcomes for people with persistent pain? Study protocol for a pragmatic randomised controlled trial. *Research Square.* 2019.
- Vlaeyen JW, Haazen IW, Schuerman JA, Kole-Snijders AM, van Eek H. Behavioural rehabilitation of chronic low back pain: comparison of an operant treatment, an operant-cognitive treatment and an operant-respondent treatment. *Br J Clin Psychol.* 1995;34(1):95-118.
- Voigt-Radloff S, Schöpf AC, Boeker M, et al. Well informed physician-patient communication in consultations on back pain – study protocol of the cluster randomized GAP trial. *BMC Family Practice.* 2019;20(1):33.
- Von Korff M, Moore JE, Lorig K, et al. A randomized trial of a lay person-led self-management group intervention for back pain patients in primary care. *Spine (Phila Pa 1976).* 1998;23(23):2608-2615.
- Werner EL, Storheim K, Løchting I, Wisløff T, Grotle M. Cognitive Patient Education for Low Back Pain in Primary Care: A Cluster Randomized Controlled Trial and Cost-Effectiveness Analysis. *Spine (Phila Pa 1976).* 2016;41(6):455-462.
- Westrom KK, Maiers MJ, Evans RL, Bronfort G. Individualized chiropractic and integrative care for low back pain: the design of a randomized clinical trial using a mixed-methods approach. *Trials.* 2010;11:24.
- Wetherell JL, Afari N, Rutledge T, et al. A randomized, controlled trial of acceptance and commitment therapy and cognitive-behavioral therapy for chronic pain. *Pain.* 2011;152(9):2098-2107.
- Williams A, Lee H, Kamper SJ, et al. Causal mechanisms of a healthy lifestyle intervention for patients with musculoskeletal pain who are overweight or obese. *Clin Rehabil.* 2019;33(6):1088-1097.
- Zhang Y, Wan L, Wang X. The effect of health education in patients with chronic low back pain. *J Int Med Res.* 2014;42(3):815-820.

## Supplementary D. Individual study characteristics of included studies

**Supplementary Table 2.** Individual study characteristics of included studies for physical function and pain intensity

| Author, Year                  | Study design | Psychological intervention setting | Coded interventions   | Intervention duration (weeks) | Outcome scale                        |                | Funding                                                                                                                                                                                                                                                                                                                            |
|-------------------------------|--------------|------------------------------------|-----------------------|-------------------------------|--------------------------------------|----------------|------------------------------------------------------------------------------------------------------------------------------------------------------------------------------------------------------------------------------------------------------------------------------------------------------------------------------------|
|                               |              |                                    |                       |                               | Physical function                    | Pain intensity |                                                                                                                                                                                                                                                                                                                                    |
| Alaranta, 1994[2]             | RCT          | Inpatient (Hospital)               | CBT+PC, PC            | 3                             | PDI (Million)                        | Not assessed   | -                                                                                                                                                                                                                                                                                                                                  |
| Aliyu, 2018[3]                | RCT          | Outpatient                         | CBT+PC, PC            | 4                             | ODI                                  | VAS            | -                                                                                                                                                                                                                                                                                                                                  |
| Altmaier, 1992[4]             | RCT          | Inpatient (Hospital)               | CP+PC (2 arms)        | 3                             | LBP Rating Scale                     | MPQ            | National Institute for Handicapped Research                                                                                                                                                                                                                                                                                        |
| Bagheri, 2020[5]              | RCT          | Outpatient                         | CP+PC, PC             | 8                             | RMDQ                                 | Not assessed   | Research Center (Semnan University of Medical Sciences)                                                                                                                                                                                                                                                                            |
| Bendix 1998[6, 7] (Project A) | RCT          | Outpatient                         | CP+PC, NI             | 6                             | Investigator-initiated questionnaire | Box Scale      | Danish Rheumatism Association, the Danish Ministry of Health, the National Health Fund for Research and Development, the Danish Society for Manual Medicine, Minister Erna Hamilton's Foundation, the Foundation of Gerda and Aage Haensch, the Research Foundation of Copenhagen University, the Rockwool Foundation, and others. |
| Bendix 1998[6, 7] (Project B) | RCT          | Outpatient                         | CP+PC, CBT+PC, PC     | 6                             | Investigator-initiated questionnaire | Box Scale      | Danish Rheumatism Association, the Danish Ministry of Health, the National Health Fund for Research and Development, the Danish Society for Manual Medicine, Minister Erna Hamilton's Foundation, the Foundation of Gerda and Aage Haensch, the Research Foundation of Copenhagen University, the Rockwool Foundation, and others. |
| Bendix, 2000[8]               | RCT          | Outpatient                         | CBT+PC, PC            | 6                             | MRS (disability subscale)            | Box Scale      | Danish Rheumatism Association, the Gerda and Aage Hensch Foundation, the Director Ib Henriksen's Fund, the Insurance Company for Industrial Injuries, the Lily Benthine Lunds Fund, the DANICA Pension, the Municipal Pension Insurance Company td, and the Danish Society for Manual Medicine.                                    |
| Brox, 2003[9]                 | RCT          | Outpatient                         | CBT+PC, Lumbar fusion | 3                             | ODI                                  | VAS            | Federal and Foundation funds                                                                                                                                                                                                                                                                                                       |
| Cherkin, 1996[10]             | RCT          | Outpatient                         | PE (2 arms)           | 3 days                        | RMDQ                                 | Not assessed   | Agency of Health Care Policy and Research and the Northwest Health Services Research and Development Field Program (Seattle Veterans Affairs Medical Center)                                                                                                                                                                       |
| Cherkin, 2016[11]             | RCT          | Outpatient                         | Mind, UC, CBT         | 8                             | RMDQ                                 | GCPS           | National Center for Complementary and Integrative Health (NICCIH) of the National Institutes of Health (NIH)                                                                                                                                                                                                                       |

|                                |     |                          |                       |       |                            |                           |                                                                                                                |
|--------------------------------|-----|--------------------------|-----------------------|-------|----------------------------|---------------------------|----------------------------------------------------------------------------------------------------------------|
| Chiauzzi, 2010[12]             | RCT | Outpatient (Online only) | CBT, Adv              | 4     | ODI                        | BPI                       | National Institute on Drug Abuse                                                                               |
| Christiansen, 2010[13]         | RCT | Outpatient               | CBT+PC, PE+PC         | 3     | Hannover ADL Questionnaire | NRS                       | -                                                                                                              |
| Cuesta-Vargas, 2011[14]        | RCT | Outpatient               | PE+PC (2 arms)        | 15    | RMDQ                       | VAS                       | -                                                                                                              |
| Dufour, 2010[15]               | RCT | Outpatient               | CP+PC, PC             | 12    | RMDQ                       | VAS                       | Funds were received, although source of funding was not specified.                                             |
| Fairbank, 2005[16]             | RCT | Outpatient               | CBT+PC, Lumbar fusion | 3     | ODI                        | Not assessed              | Medical Research Council NHS or private patient insurance funded the treatment of patients.                    |
| Farokhi, 2020[17]              | RCT | Outpatient               | CP+PC, BT+PC          | 8     | ODI                        | Not assessed              | Neuro-Musculoskeletal Rehabilitation Centre (Semnan University of Medical Sciences)                            |
| Friedrich, 1998[18] & 2005[19] | RCT | Outpatient               | CP+PC, PC             | 3.5   | LBOS                       | LBOS (pain sub-scale)     | -                                                                                                              |
| Frost, 1998[20]                | RCT | Outpatient               | CBT+PC, PC            | 10    | ODI                        | Not assessed              | -                                                                                                              |
| Galan-Martin, 2020[21]         | RCT | Outpatient               | PE+PC, PC             | 11    | RMDQ                       | VAS                       | Regional Health Management of Castilla                                                                         |
| Gannon, 2019[22] (Study 1)     | RCT | Outpatient               | CP+PC, CP             | 8     | RMDQ                       | NRS                       | -                                                                                                              |
| Gannon, 2019[22] (Study 2)     | RCT | Outpatient               | CP+PC, CP             | 8     | RMDQ                       | NRS                       | -                                                                                                              |
| Gardner, 2019[23]              | RCT | Outpatient               | PE, PC                | 8     | QBPDS                      | NRS                       | -                                                                                                              |
| Ghadyani, 2017[24]             | RCT | Outpatient               | CBT+PC, Adv           | 1 day | RMDQ                       | VAS                       | Deputy of Tarbiat Modares University                                                                           |
| Gibbs, 2018[25]                | RCT | Outpatient               | CP, NI                | 24    | ODI                        | VAS                       | Virginia Kaufman Endowment Fund for Pain Research and National Institutes of Health                            |
| Glombiewski, 2010[26]          | RCT | Outpatient               | CBT, CBT              | 32    | PDI                        | German Pain Questionnaire | -                                                                                                              |
| Glombiewski, 2018[27]          | RCT | Outpatient               | CP (3 arms)           | 18-25 | QBPDS                      | NRS                       | German Research Foundation (DFG)                                                                               |
| Godfrey, 2019[28]              | RCT | Outpatient               | Mind+PC, PC           | 4     | RMDQ                       | PNAS                      | National Institute for Health Research (NIHR)                                                                  |
| Gould, 2020[29]                | RCT | Outpatient               | CP, GP                | 12    | RMDQ                       | DDS                       | Office of Research and Development, Clinical Sciences Research and Development, Department of Veterans Affairs |
| Grande-Alonso, 2019[30]        | RCT | Outpatient               | CP+PC (2 arms)        | 4     | RMDQ                       | VAS                       | -                                                                                                              |
| Haas, 2005[31]                 | RCT | Outpatient               | CP, NI                | 6     | MVK (disability sub-scale) | MVK (pain sub-scale)      | Health Resources and Services Administration, US Department of Health and Human Services                       |
| Harris, 2017[32]               | RCT | Outpatient               | CP+PC, CP (2 arms)    | 12    | ODI                        | Not assessed              | The Research Council of Norway, Norwegian Extra Foundation for Health and Rehabilitation                       |

|                      |     |                          |                    |                                                                                   |              |                      |                                                                                                                                                                                                |
|----------------------|-----|--------------------------|--------------------|-----------------------------------------------------------------------------------|--------------|----------------------|------------------------------------------------------------------------------------------------------------------------------------------------------------------------------------------------|
| Jensen, 2012[33]     | RCT | Outpatient               | Csl, UC            | 12                                                                                | RMDQ         | NRS                  | Danish Research Fund for the Working Environment                                                                                                                                               |
| Johnson, 2007[34]    | RCT | Outpatient               | CBT, GP            | 6                                                                                 | RMDQ         | VAS                  | Charity funds were received, although source of funding was not specified.                                                                                                                     |
| Kapitza, 2010[35]    | RCT | Outpatient               | BT (2 arms)        | 2                                                                                 | PDI          | VAS                  | -                                                                                                                                                                                              |
| Khan, 2014[36]       | RCT | Outpatient               | CBT+PC, PC         | 12                                                                                | RMDQ         | VAS                  | -                                                                                                                                                                                              |
| Khodadad, 2020[37]   | RCT | Outpatient               | CP+PC, PC (2 arms) | 8                                                                                 | Not assessed | VAS                  | -                                                                                                                                                                                              |
| Krein, 2013[38]      | RCT | Outpatient (Online only) | Csl, NI            | Not reported clearly (self-directed website access and e-community)               | RMDQ         | NRS                  | Department of Veterans Affairs, Health Services Research and Development Services                                                                                                              |
| Lamb, 2010[39, 40]   | RCT | Outpatient               | CBT, NI            | 6                                                                                 | RMDQ         | MVK (pain sub-scale) | National Institute for Health Research Health Technology Assessment Programme                                                                                                                  |
| Lambeek, 2010[41]    | RCT | Outpatient               | CP, UC             | 12                                                                                | RMDQ         | NRS                  | VU University Medical Center, TNO Work and Employment, Dutch Health Insurance Executive Council, Stichting Institute GAK, and the Netherlands Organisation for Health Research and Development |
| Leeuw, 2008[42]      | RCT | Outpatient               | CBT, BT            | Not reported clearly (~13 weeks)                                                  | RMDQ         | VAS                  | -                                                                                                                                                                                              |
| Luedtke, 2016[43]    | RCT | Outpatient               | CP+PC (2 arms)     | 4                                                                                 | ODI          | VAS                  | Deutsche Forschungsgemeinschaft (DFG)                                                                                                                                                          |
| Lorig, 2002[44]      | RCT | Outpatient (Online only) | PE, UC             | Not reported clearly (moderated email discussion group, pain education resources) | RMDQ         | VAS                  | -                                                                                                                                                                                              |
| Louw, 2017[45]       | RCT | Outpatient               | PE+PC, PC          | 1 day                                                                             | Not assessed | NRS                  | -                                                                                                                                                                                              |
| Macedo, 2012[46]     | RCT | Outpatient               | CP+PC, CP          | 8                                                                                 | RMDQ         | NRS                  | Australian National Health and Medical Research Council                                                                                                                                        |
| Magalhaes, 2017[47]  | RCT | Outpatient               | CP+PC, PC          | 6                                                                                 | RMDQ         | NRS                  | Fundacao de Amparo a Pesquisa do Estado de Sao Paulo (FAPESP)                                                                                                                                  |
| Magnussen, 2007[48]  | RCT | Outpatient               | CP, NI             | 1-2                                                                               | RMDQ         | Not assessed         | Norwegian Foundation for Health and Rehabilitation                                                                                                                                             |
| Mehling, 2005[49]    | RCT | Outpatient               | Mind+PC, PC        | 6-8                                                                               | RMDQ         | VAS                  | Mount Zion Health Fund (San Francisco) and Health Resources and Services Administration                                                                                                        |
| Michaelson, 2016[50] | RCT | Outpatient               | PE+PC (2 arms)     | 8                                                                                 | RMDQ         | VAS                  | -                                                                                                                                                                                              |
| Monticone, 2013[51]  | RCT | Outpatient               | CBT+PC, PC         | 52                                                                                | RMDQ         | NRS                  | -                                                                                                                                                                                              |
| Monticone, 2016[52]  | RCT | Outpatient               | CBT+PC, PC         | 5                                                                                 | ODI          | NRS                  | -                                                                                                                                                                                              |
| Moore, 2000[53]      | RCT | Outpatient               | CP, GP             | 2-3                                                                               | RMDQ         | NRS                  | National Institutes of Health, The Boeing Company and the Group Health Foundation                                                                                                              |

|                                |     |                                     |                                        |                                                            |              |                               |                                                                                                              |
|--------------------------------|-----|-------------------------------------|----------------------------------------|------------------------------------------------------------|--------------|-------------------------------|--------------------------------------------------------------------------------------------------------------|
| Morone, 2016[54]               | RCT | Outpatient                          | Mind, Adv                              | 8                                                          | RMDQ         | NRS                           | National Institutes of Health                                                                                |
| Moseley, 2002[55]              | RCT | Outpatient                          | PE+PC, GP                              | 4                                                          | RMDQ         | NRS                           | -                                                                                                            |
| Moseley, 2003[56]              | RCT | Outpatient                          | PE+PC (2 arms)                         | 4                                                          | RMDQ         | NRS                           | -                                                                                                            |
| Moseley, 2004[57]              | RCT | Outpatient                          | PE, Adv                                | 2-3                                                        | RMDQ         | Not assessed                  | -                                                                                                            |
| Nguyen, 2017[58]               | RCT | Inpatient (Spa Centre)              | PE+PC, PE                              | 5 days                                                     | RMDQ         | NRS                           | Association Francise pour la Recherche Thermale                                                              |
| Nicholas, 1991[59]             | RCT | Outpatient                          | BT+PC (2 arms),<br>CBT+PC (3 arms), PC | 5                                                          | Not assessed | PRC                           | -                                                                                                            |
| O'Keeffe, 2020[60]             | RCT | Outpatient                          | CBT+PC, CP+PC                          | 12                                                         | ODI          | NRS                           | Health Research Institute (University of Limerick)                                                           |
| Paolucci, 2017[61]             | RCT | Outpatient                          | Mind+PC, PC                            | 5                                                          | Not assessed | VAS                           | -                                                                                                            |
| Pardo, 2018[62]                | RCT | Outpatient                          | PE+PC, PC                              | 4                                                          | RMDQ         | NRS                           | -                                                                                                            |
| Petrozzi, 2019[63]             | RCT | Outpatient                          | CBT+PC, PC                             | 8                                                          | RMDQ         | NRS                           | -                                                                                                            |
| Pires, 2015[64]                | RCT | Outpatient                          | PE+PC, PC                              | 6                                                          | QBPDS        | VAS                           | -                                                                                                            |
| Poole, 2007[65]                | RCT | Outpatient                          | BT, PC, UC                             | 6                                                          | ODI          | VAS                           | -                                                                                                            |
| Rabiei, 2020[66]               | RCT | Outpatient                          | PE+PC, PC                              | 8                                                          | RMDQ         | VAS                           | -                                                                                                            |
| Reiner, 2019[67]               | RCT | Outpatient                          | Mind, NI                               | 8                                                          | Not assessed | BPI                           | -                                                                                                            |
| Reme, 2016[68]                 | RCT | Outpatient                          | CP (2 arms)                            | 8-12                                                       | ODI          | NRS                           | -                                                                                                            |
| Rizzo, 2018[69]                | RCT | Outpatient                          | CP, PE                                 | 2                                                          | RMDQ         | NRS                           | -                                                                                                            |
| Rose, 1997[70]<br>(Study 1)    | RCT | Outpatient                          | CBT (2 arms)                           | 1-2                                                        | RMDQ         | VAS                           | -                                                                                                            |
| Rose, 1997[70]<br>(Study 2)    | RCT | Outpatient                          | CBT (3 arms)                           | 1-2                                                        | RMDQ         | VAS                           | -                                                                                                            |
| Sander, 2020[71]               | RCT | Outpatient (Online only)            | CP, UC                                 | 7-19                                                       | ODI          | NRS                           | German Federal Ministry of Education and Research                                                            |
| Santaella da Fonseca, 2009[72] | RCT | Outpatient                          | CBT+PC, NI                             | 8                                                          | RMDQ         | VAS                           | -                                                                                                            |
| Saper, 2017[73]                | RCT | Outpatient                          | Mind+PC, PE                            | 12 weeks treatment phase + 40 weeks maintenance phase      | RMDQ         | NRS                           | National Center for Complementary and Integrative Health (NICCIH) of the National Institutes of Health (NIH) |
| Saracoglu, 2020[74]            | RCT | Outpatient                          | PE+PC, PC (2 arms)                     | 4                                                          | ODI          | NRS                           | -                                                                                                            |
| Saracoglu, 2020[75]            | RCT | Outpatient                          | PE+PC, PC                              | 4                                                          | Not assessed | NRS                           | -                                                                                                            |
| Schaller, 2016[76]             | RCT | Inpatient (Hospital) and Outpatient | CP, Adv                                | Not reported clearly (Inpatient stay, aftercare delivered) | Not assessed | SF-36 (bodily pain sub-scale) | German Statutory Pension Insurance Rhineland                                                                 |

|                        |     |                           |                       |                                                                                       |                   |                               |                                                                                                                                                   |
|------------------------|-----|---------------------------|-----------------------|---------------------------------------------------------------------------------------|-------------------|-------------------------------|---------------------------------------------------------------------------------------------------------------------------------------------------|
|                        |     |                           |                       | at 8 and 12 weeks post-discharge, self-directed internet-based aftercare program)     |                   |                               |                                                                                                                                                   |
| Shariat, 2019[77]      | RCT | Outpatient                | BT+PC, BT, PC, NI     | 6                                                                                     | Not assessed      | FRI                           | -                                                                                                                                                 |
| Siemonsma, 2013[78]    | RCT | Outpatient                | CBT, NI               | 12                                                                                    | QBPDS             | Not assessed                  | Health Research and Development                                                                                                                   |
| Smeets, 2008[79]       | RCT | Outpatient                | CBT+PC, CBT, PC       | 10                                                                                    | RMDQ              | VAS                           | Zorgonderzoek Nederland/Medische Wetenschappen Gran                                                                                               |
| Spinhoven, 2004[80]    | RCT | Speciality Clinic         | CBT, CP, NI           | 10                                                                                    |                   |                               | -                                                                                                                                                 |
| Soleymani, 2021[81]    | RCT | Outpatient                | CBT, GP               | 12-24                                                                                 | Not assessed      | CPGQ                          | -                                                                                                                                                 |
| Sorensen, 2010[82]     | RCT | Outpatient                | PE+PC, PC             | 1-3                                                                                   | Not assessed      | NRS                           | IMK Foundation, Health Insurance Foundation                                                                                                       |
| Stuckey, 1986[83]      | RCT | Outpatient                | BT (2 arms), Adv      | Not reported clearly (8 sessions)                                                     | ADL Questionnaire | PIQ                           | Doctors Education and Research Fund                                                                                                               |
| Tan, 2015[84]          | RCT | Outpatient                | BT, hypnosis (3 arms) | 8                                                                                     | Not assessed      | BPI                           | Veterans Health Administration rehabilitation Research and Development Service                                                                    |
| Tavafian, 2017[85]     | RCT | Outpatient                | CP, GP                | 1 week + monthly booster sessions delivered between 24 to 30 months post-intervention | RMDQ              | SF-36 (bodily pain sub-scale) | Research Deputy of Tehran University of Medical Sciences                                                                                          |
| Tekur, 2008[86]        | RCT | Inpatient (Health Centre) | Csl+PC, PE+PC         | 1                                                                                     | ODI               | Not assessed                  | -                                                                                                                                                 |
| Tilbrook, 2011[87]     | RCT | Outpatient                | CP+PC, PE             | 12                                                                                    | RMDQ              | Not assessed                  | Arthritis Research UK                                                                                                                             |
| Turner, 1982[88]       | RCT | Outpatient                | BT, CBT, NI           | 5                                                                                     | Not assessed      | VAS                           | -                                                                                                                                                 |
| Turner, 1988[89]       | RCT | Outpatient                | CBT, BT, NI           | 8                                                                                     | Not assessed      | MPQ                           | National Institute of Neurological and Communicative Disorders and Stroke and a National Institutes of Health Biomedical Research Grant RR 05432. |
| Turner, 1990[90]       | RCT | Outpatient                | BT+PC, BT, PC, NI     | 8                                                                                     | Not assessed      | VAS                           | -                                                                                                                                                 |
| Turner, 1993[91]       | RCT | Outpatient                | CBT (2 arms), BT, NI  | 6                                                                                     | Not assessed      | VAS                           | National Institute of Neurological and Communicative Disorders and Stroke                                                                         |
| Unal, 2020[92]         | RCT | Outpatient                | PE, PC                | 8                                                                                     | RMDQ              | MPQ                           | -                                                                                                                                                 |
| van der Roer, 2008[93] | RCT | Outpatient                | BT+PC, PC             | 30                                                                                    | RMDQ              | NRS                           | Netherlands Organisation for Health Research and Development                                                                                      |
| Vibe Fersum, 2019[94]  | RCT | Outpatient                | CBT+PC, PC            | 12                                                                                    | ODI               | NRS                           | The Norwegian Fund for Post-Graduate Training in Physiotherapy                                                                                    |
| Von Korff, 2005[95]    | RCT | Outpatient                | CP, UC                | 4-8                                                                                   | RMDQ              | NRS                           | National Institutes of Health                                                                                                                     |

|                 |     |            |             |    |              |              |                                                                                            |
|-----------------|-----|------------|-------------|----|--------------|--------------|--------------------------------------------------------------------------------------------|
| Vong, 2011[96]  | RCT | Outpatient | Csl+PC, PC  | 8  | RMDQ         | VAS          | -                                                                                          |
| Woods, 2008[97] | RCT | Outpatient | CBT, BT, NI | 4  | PDI          | MPQ-SF (PRI) | Royal Bank of Canada and a Canadian Institutes of Health Research Investigator Award       |
| Yao, 2020[98]   | RCT | Outpatient | Mind+PC, PC | 24 | Not assessed | VAS          | Shanghai Three Year Action Plan for Further Accelerate the Development of Chinese Medicine |

ADL: Activities of Daily Living, Adv: advice, BPI: Brief Pain Inventory, BT: behavioural therapy, BT+PC: behavioural therapy delivered with physiotherapy care, CBT: cognitive behavioural therapy, CBT+PC: cognitive behavioural therapy delivered with physiotherapy care, CP: combined psychological approaches, CP+PC: combined psychological approaches delivered with physiotherapy care, CPGQ: Chronic Pain Grade Questionnaire, Csl: counselling, Csl+PC: counselling delivered with physiotherapy care, DDS: Descriptor Differential Scale, FRI: Functional Rating Index Test, GCPS: Graded Chronic Pain Scale, GP: general practitioner care, LBP: low back pain, LBOS: Low Back Outcome Score, Mind: mindfulness, Mind+PC: mindfulness delivered with physiotherapy care, MPQ: McGill Pain Questionnaire, MPQ-SF: McGill Pain Questionnaire Short Form, MPQ-SF (PRI): McGill Pain Questionnaire Pain Rating Index, MRS: Manniche's Rating Scale, MVK: Modified Von Korff Scale, NI: no intervention, NRS: Numeric Rating Scale, ODI: Oswestry Disability Index, PC: physiotherapy care, PDI: Pain Disability Index, PDI (Million): Pain Disability Index Million, PE: pain education, PE+PC: pain education delivered with physiotherapy care, PIQ: Pain Intensity Questionnaire, PNAS: Pain Numeric Analogue Scale, PRC: Pain Rating Chart, QBPDS: Quebec Back Pain Disability Scale, RCT: randomised controlled trial, RMDQ: Roland Morris Disability Questionnaire, SF-36: 36-Item Short Form Survey, UC: usual care, VAS: Visual Analogue Scale.



**Supplementary Table 3.** Individual study characteristics of included studies for fear avoidance, health-related quality of life, intervention compliance and safety

| Author, Year                  | Study Design | Psychological intervention setting | Coded interventions   | Intervention duration (weeks) | Outcome                                   |                                       |                                      |                     | Funding                                                                                                                                                                                                                                                                                                                            |
|-------------------------------|--------------|------------------------------------|-----------------------|-------------------------------|-------------------------------------------|---------------------------------------|--------------------------------------|---------------------|------------------------------------------------------------------------------------------------------------------------------------------------------------------------------------------------------------------------------------------------------------------------------------------------------------------------------------|
|                               |              |                                    |                       |                               | Fear avoidance                            | HRQoL                                 | Intervention compliance <sup>a</sup> | Safety <sup>b</sup> |                                                                                                                                                                                                                                                                                                                                    |
| Aliyu, 2018[3]                | RCT          | Outpatient                         | CBT+PC, PC            | 4                             | FABQ (PA)                                 | Not assessed                          | Sufficient data                      | -                   | -                                                                                                                                                                                                                                                                                                                                  |
| Bagheri, 2020[5]              | RCT          | Outpatient                         | CP+PC, PC             | 8                             | FABQ (unclear which sub-scales were used) | Not assessed                          | Sufficient data                      | -                   | Research Centre (Semnan University of Medical Sciences)                                                                                                                                                                                                                                                                            |
| Bendix 1998[6, 7] (Project A) | RCT          | Outpatient                         | CP+PC, NI             | 6                             | Not assessed                              | Investigator-initiated question (0-5) | -                                    | -                   | Danish Rheumatism Association, the Danish Ministry of Health, the National Health Fund for Research and Development, the Danish Society for Manual Medicine, Minister Erna Hamilton's Foundation, the Foundation of Gerda and Aage Haensch, the Research Foundation of Copenhagen University, the Rockwool Foundation, and others. |
| Bendix 1998[6, 7] (Project B) | RCT          | Outpatient                         | CP+PC, CBT+PC, PC     | 6                             | Not assessed                              | Investigator-initiated question (0-5) | Sufficient data                      | -                   | Danish Rheumatism Association, the Danish Ministry of Health, the National Health Fund for Research and Development, the Danish Society for Manual Medicine, Minister Erna Hamilton's Foundation, the Foundation of Gerda and Aage Haensch, the Research Foundation of Copenhagen University, the Rockwool Foundation, and others. |
| Bendix, 2000[8]               | RCT          | Outpatient                         | CBT+PC, PC            | 6                             | Not assessed                              | Investigator-initiated question (0-5) | Sufficient data                      | -                   | Danish Rheumatism Association, the Gerda and Aage Hensch Foundation, the Director Ib Henriksen's Fund, the Insurance Company for Industrial Injuries, the Lily Benthine Lunds Fund, the DANICA Pension, the Municipal Pension Insurance Company td, and the Danish Society for Manua Medicine.                                     |
| Brox, 2003[9]                 | RCT          | Outpatient                         | CBT+PC, Lumbar fusion | 3                             | FABQ (PA)                                 | Not assessed                          | -                                    | -                   | Federal and Foundation funds                                                                                                                                                                                                                                                                                                       |
| Cherkin, 2016[11]             | RCT          | Outpatient                         | Mind, UC, CBT         | 8                             | Not assessed                              | SF-12 (PCS)                           | -                                    | -                   | National Centre for Complementary and Integrative Health (NICCIH) of the National Institutes of Health (NIH)                                                                                                                                                                                                                       |

|                           |     |                          |                       |    |                                         |                                                                             |                 |                 |                                                                                                                |
|---------------------------|-----|--------------------------|-----------------------|----|-----------------------------------------|-----------------------------------------------------------------------------|-----------------|-----------------|----------------------------------------------------------------------------------------------------------------|
| Chiauzzi, 2010[12]        | RCT | Outpatient (Online only) | CBT, Adv              | 4  | FABQ (PA)                               | Not assessed                                                                | -               | -               | National Institute on Drug Abuse                                                                               |
| Cuesta-Vargas, 2011[14]   | RCT | Outpatient               | PE+PC (2 arms)        | 15 | Not assessed                            | SF-36 (PCS)                                                                 | -               | -               | -                                                                                                              |
| Dufour, 2010[15]          | RCT | Outpatient               | CP+PC, PC             | 12 | Not assessed                            | SF-36 (all sub-scales)                                                      | -               | -               | Funds were received, although source of funding was not specified.                                             |
| Fairbank, 2005[16]        | RCT | Outpatient               | CBT+PC, Lumbar fusion | 3  | Not assessed                            | SF-36 (PCS)                                                                 | -               | -               | Medical Research Council NHS or private patient insurance funded the treatment of patients.                    |
| Farokhi, 2020[17]         | RCT | Outpatient               | CP+PC, BT+PC          | 8  | FABQ (unclear which sub-scale was used) | Not assessed                                                                | -               | -               | Neuro-Musculoskeletal Rehabilitation Centre (Semnan University of Medical Sciences)                            |
| Galan-Martin, 2020[21]    | RCT | Outpatient               | PE+PC, PC             | 11 | PCS                                     | SF-36 (PCS)                                                                 | -               | Sufficient data | Regional Health Management of Castilla                                                                         |
| Gannon 2019 (Study 1)[22] | RCT | Outpatient               | CP+PC, CP             | 8  | PCS                                     | Not assessed                                                                | Sufficient data | -               | -                                                                                                              |
| Gannon 2019 (Study 2)[22] | RCT | Outpatient               | CP+PC, CP             | 8  | PCS                                     | Not assessed                                                                | Sufficient data | -               | -                                                                                                              |
| Gardner, 2019[23]         | RCT | Outpatient               | PE, PC                | 8  | TSK                                     | SF-36 (overall score)                                                       | -               | -               | -                                                                                                              |
| Gibbs, 2018[25]           | RCT | Outpatient               | CP, NI                | 24 | Not assessed                            | Not assessed                                                                | -               | Sufficient data | Virginia Kaufman Endowment Fund for Pain Research and National Institutes of Health                            |
| Glombiewski, 2010[26]     | RCT | Outpatient               | CBT, CBT              | 32 | Not assessed                            | HRLSS                                                                       | -               | -               | -                                                                                                              |
| Godfrey, 2020[28]         | RCT | Outpatient               | Mind+PC, PC           | 4  | Not assessed                            | SF-12 (PCS)                                                                 | -               | Sufficient data | National Institute for Health Research (NIHR)                                                                  |
| Gould, 2020[29]           | RCT | Outpatient               | CP, GP                | 12 | Not assessed                            | Not assessed                                                                | Sufficient data | -               | Office of Research and Development, Clinical Sciences Research and Development, Department of Veterans Affairs |
| Grande-Alonso, 2019[30]   | RCT | Outpatient               | CP+PC (2 arms)        | 4  | TSK                                     | Not assessed                                                                | -               | -               | -                                                                                                              |
| Haas, 2005[31]            | RCT | Outpatient               | CP, NI                | 6  | Not assessed                            | SF-36 (general health, emotional well-being, and energy-fatigue sub-scales) | -               | -               | Health Resources and Services Administration, US Department of Health and Human Services                       |
| Harris, 2017[32]          | RCT | Outpatient               | CP+PC, CP (2 arms)    | 12 | FABQ (PA)                               | Not assessed                                                                | -               | -               | The Research Council of Norway, Norwegian Extra Foundation for Health and Rehabilitation                       |

|                     |     |                          |                    |                                                             |              |                                                         |                 |                 |                                                                                                                                                                                                |
|---------------------|-----|--------------------------|--------------------|-------------------------------------------------------------|--------------|---------------------------------------------------------|-----------------|-----------------|------------------------------------------------------------------------------------------------------------------------------------------------------------------------------------------------|
| Jensen, 2012[33]    | RCT | Outpatient               | Csl, UC            | 12                                                          | FABQ (PA)    | SF-36 (physical functioning and bodily pain sub-scales) | -               | -               | Danish Research Fund for the Working Environment                                                                                                                                               |
| Johnson, 2007[34]   | RCT | Outpatient               | CBT, GP            | 6                                                           | Not assessed | EQ-5D                                                   | -               | -               | Charity funds were received, although source of funding was not specified.                                                                                                                     |
| Khodadad, 2020[37]  | RCT | Outpatient               | CP+PC, PC (2 arms) | 8                                                           | Not assessed | Not assessed                                            | Sufficient data | -               | -                                                                                                                                                                                              |
| Krein, 2013[38]     | RCT | Outpatient (Online only) | Csl, NI            | Nr clearly (self-directed website access and e-community)   | FABQ (PA)    | Not assessed                                            | -               | -               | Department of Veterans Affairs, Health Services Research and Development Services                                                                                                              |
| Lamb, 2010[39]      | RCT | Outpatient               | CBT, NI            | 6                                                           | FABQ (PA)    | SF-12 (PCS)                                             | -               | Sufficient data | National Institute for Health Research Health Technology Assessment Programme                                                                                                                  |
| Lambeek, 2010[41]   | RCT | Outpatient               | CP, UC             | 12                                                          | Not assessed | Not assessed                                            | Sufficient data | Sufficient data | VU University Medical Centre, TNO Work and Employment, Dutch Health Insurance Executive Council, Stichting Institute GAK, and the Netherlands Organisation for Health Research and Development |
| Leeuw, 2008[42]     | RCT | Outpatient               | CBT, BT            | Nr clearly (~13 weeks)                                      | PCS          | Not assessed                                            | Sufficient data | Sufficient data | -                                                                                                                                                                                              |
| Lorig, 2002[44]     | RCT | Outpatient (Online only) | PE, UC             | Nr clearly (moderated email discussion group, PE resources) | Not assessed | IIS                                                     | Sufficient data | -               | -                                                                                                                                                                                              |
| Louw, 2017[45]      | RCT | Outpatient               | PE+PC, PC          | 1 day                                                       | FABQ (PA)    | Not assessed                                            | Sufficient data | -               | -                                                                                                                                                                                              |
| Luedtke, 2016[43]   | RCT | Outpatient               | CP+PC (2 arms)     | 4                                                           | FABQ (PA)    | SF-36 (all sub-scales)                                  | -               | -               | Deutsche Forschungsgemeinschaft (DFG)                                                                                                                                                          |
| Macedo, 2012[46]    | RCT | Outpatient               | CP+PC, CP          | 8                                                           | Not assessed | SF-12 (PCS)                                             | Sufficient data | -               | Australian National Health and Medical Research Council                                                                                                                                        |
| Magalhaes, 2017[47] | RCT | Outpatient               | CP+PC, PC          | 6                                                           | TSK          | SF-36 (physical role and emotional role sub-scales)     | Sufficient data | Sufficient data | Fundacao de Amparo a Pesquisa do Estado de Sao Paulo (FAPESP)                                                                                                                                  |
| Magnussen, 2007[48] | RCT | Outpatient               | CP, NI             | 1-2                                                         | FABQ (PA)    | Not assessed                                            | -               | -               | Norwegian Foundation for Health and Rehabilitation                                                                                                                                             |

|                      |     |                          |                |        |                             |                                                        |                 |                 |                                                                                         |
|----------------------|-----|--------------------------|----------------|--------|-----------------------------|--------------------------------------------------------|-----------------|-----------------|-----------------------------------------------------------------------------------------|
| Mehling, 2005[49]    | RCT | Outpatient               | Mind+PC, PC    | 6-8    | Not assessed                | SF-36 (all sub-scales)                                 | -               | Sufficient data | Mount Zion Health Fund (San Francisco) and Health Resources and Services Administration |
| Michaelson, 2016[50] | RCT | Outpatient               | PE+PC (2 arms) | 8      | Not assessed                | SF-36 (all sub-scales)                                 | -               | -               | -                                                                                       |
| Monticone, 2013[51]  | RCT | Outpatient               | CBT+PC, PC     | 52     | TSK                         | SF-36 (all sub-scales)                                 | -               | -               | -                                                                                       |
| Monticone, 2016[52]  | RCT | Outpatient               | CBT+PC, PC     | 5      | PCS                         | SF-36 (all sub-scales)                                 | -               | -               | -                                                                                       |
| Moore, 2000[53]      | RCT | Outpatient               | CP, GP         | 2-3    | TSK                         | SF-36 (mental health sub-scale)                        | -               | Sufficient data | National Institutes of Health, The Boeing Company, and the Group Health Foundation      |
| Morone, 2016[54]     | RCT | Outpatient               | Mind, Adv      | 8      | CSQ (catastrophising scale) | RAND-36 (global health and physical health sub-scales) | -               | -               | National Institutes of Health                                                           |
| Moseley, 2002[55]    | RCT | Outpatient               | PE+PC, GP      | 4      | PCS                         | Not assessed                                           | Sufficient data | -               | -                                                                                       |
| Nguyen, 2017[58]     | RCT | Inpatient (Spa Centre)   | PE+PC, PE      | 5 days | Not assessed                | SF-12 (PCS)                                            | -               | Sufficient data | Association Francise pour la Recherche Thermale                                         |
| O'Keeffe, 2020[60]   | RCT | Outpatient               | CBT+PC, CP+PC  | 12     | FABQ (PA)                   | SHCI                                                   | Sufficient data | Sufficient data | Health Research Institute (University of Limerick)                                      |
| Paolucci, 2017[61]   | RCT | Outpatient               | Mind+PC, PC    | 5      | Not assessed                | SF-36 (vitality and social functioning sub-scales)     | -               | -               | -                                                                                       |
| Pardo, 2018[62]      | RCT | Outpatient               | PE+PC, PC      | 4      | PCS                         | Not assessed                                           | Sufficient data | -               | -                                                                                       |
| Petrozzi, 2019[63]   | RCT | Outpatient               | CBT+PC, PC     | 8      | PCS                         | Not assessed                                           | Sufficient data | Sufficient data | -                                                                                       |
| Pires, 2015[64]      | RCT | Outpatient               | PE+PC, PC      | 6      | TSK                         | Not assessed                                           | -               | Sufficient data | -                                                                                       |
| Poole, 2007[65]      | RCT | Outpatient               | BT, PC, UC     | 6      | Not assessed                | SF-36 (all sub-scales)                                 | -               | -               | -                                                                                       |
| Rabiei, 2020[66]     | RCT | Outpatient               | PE+PC, PC      | 8      | FABQ (PA)                   | Not assessed                                           | Sufficient data | Sufficient data | -                                                                                       |
| Reme, 2016[68]       | RCT | Outpatient               | CP (2 arms)    | 8-12   | Not assessed                | EQ-5D                                                  | -               | -               | -                                                                                       |
| Rizzo, 2018[69]      | RCT | Outpatient               | CP, PE         | 2      | PCS                         | Not assessed                                           | Sufficient data | Sufficient data | -                                                                                       |
| Sander, 2020[71]     | RCT | Outpatient (Online only) | CP, UC         | 7-19   | Not assessed                | AQoL-6D                                                | -               | -               | German Federal Ministry of Education and Research                                       |

|                     |     |                   |                      |                                                                                       |                                  |                        |                 |                 |                                                                                                                                                   |
|---------------------|-----|-------------------|----------------------|---------------------------------------------------------------------------------------|----------------------------------|------------------------|-----------------|-----------------|---------------------------------------------------------------------------------------------------------------------------------------------------|
| Saper, 2017[73]     | RCT | Outpatient        | Mind+PC, PE          | 12 weeks treatment phase + 40 weeks maintenance phase                                 | Not assessed                     | SF-36 (PCS)            | -               | -               | National Centre for Complementary and Integrative Health (NICCIH) of the National Institutes of Health (NIH)                                      |
| Saracoglu, 2020[74] | RCT | Outpatient        | PE+PC, PC (2 arms)   | 4                                                                                     | TSK                              | Not assessed           | Sufficient data | -               | -                                                                                                                                                 |
| Saracoglu, 2020[75] | RCT | Outpatient        | PE+PC, PC            | 4                                                                                     | Not assessed                     | SF-36 (all sub-scales) | Sufficient data | -               | -                                                                                                                                                 |
| Shariat, 2019[77]   | RCT | Outpatient        | BT+PC, BT, PC, NI    | 6                                                                                     | Not assessed                     | QOLS                   | -               | -               | -                                                                                                                                                 |
| Siemonsma, 2013[78] | RCT | Outpatient        | CBT, NI              | 12                                                                                    | Not assessed                     | Not assessed           | -               | Sufficient data | Health Research and Development                                                                                                                   |
| Smeets, 2008[79]    | RCT | Outpatient        | CBT+PC, CBT, PC      | 10                                                                                    | Not assessed                     | Not assessed           | -               | Sufficient data | Zorgonderzoek Nederland/Medische Wetenschappen Gran                                                                                               |
| Sorensen, 2010[82]  | RCT | Outpatient        | PE+PC, PC            | 1-3                                                                                   | FABQ (PA)                        | Not assessed           | Sufficient data | Sufficient data | IMK Foundation, Health Insurance Foundation                                                                                                       |
| Spinhoven, 2004[80] | RCT | Speciality Clinic | CBT, CP, NI          | 10                                                                                    | PCCL (catastrophising sub-scale) |                        | -               | -               | -                                                                                                                                                 |
| Tavafian, 2017[85]  | RCT | Outpatient        | CP, GP               | 1 week + monthly booster sessions delivered between 24 to 30 months post-intervention | Not assessed                     | SF-36 (all sub-scales) | -               | -               | Research Deputy of Tehran University of Medical Sciences                                                                                          |
| Tilbrook, 2011[87]  | RCT | Outpatient        | CP+PC, PE            | 12                                                                                    | Not assessed                     | SF-12 (PCS)            | -               | -               | Arthritis Research UK                                                                                                                             |
| Turner, 1982[88]    | RCT | Outpatient        | BT, CBT, NI          | 5                                                                                     | Not assessed                     | SIP                    | -               | -               | -                                                                                                                                                 |
| Turner, 1988[89]    | RCT | Outpatient        | CBT, BT, NI          | 8                                                                                     | Not assessed                     | SIP                    | Sufficient data | -               | National Institute of Neurological and Communicative Disorders and Stroke and a National Institutes of Health Biomedical Research Grant RR 05432. |
| Turner, 1990[90]    | RCT | Outpatient        | BT+PC, BT, PC, NI    | 8                                                                                     | Not assessed                     | SIP                    | -               | -               | -                                                                                                                                                 |
| Turner, 1993[91]    | RCT | Outpatient        | CBT (2 arms), BT, NI | 6                                                                                     | Not assessed                     | SIP                    | Sufficient data | -               | National Institute of Neurological and Communicative Disorders and Stroke                                                                         |

|                        |     |            |             |     |                                         |                                                                                        |                 |                 |                                                                                            |
|------------------------|-----|------------|-------------|-----|-----------------------------------------|----------------------------------------------------------------------------------------|-----------------|-----------------|--------------------------------------------------------------------------------------------|
| Unal, 2020[92]         | RCT | Outpatient | PE, PC      | 8   | FABQ (unclear which sub-scale was used) | SF-36 (all sub-scales)                                                                 | -               | -               | -                                                                                          |
| van der Roer, 2008[93] | RCT | Outpatient | BT+PC, PC   | 30  | TSK                                     | Not assessed                                                                           | -               | -               | Netherlands Organisation for Health Research and Development                               |
| Vibe Fersum, 2019[94]  | RCT | Outpatient | CBT+PC, PC  | 12  | FABQ (PA)                               | Not assessed                                                                           | Sufficient data | -               | The Norwegian Fund for Post-Graduate Training in Physiotherapy                             |
| Von Korff, 2005[95]    | RCT | Outpatient | CP, UC      | 4-8 | TSK                                     | SF-36 (social functioning and mental health sub-scales)                                | -               | -               | National Institutes of Health                                                              |
| Vong, 2011[96]         | RCT | Outpatient | Csl+PC, PC  | 8   | Not assessed                            | SF-36 (physical functioning, physical role, bodily pain, and global health sub-scales) | Sufficient data | Sufficient data | -                                                                                          |
| Woods, 2008[97]        | RCT | Outpatient | CBT, BT, NI | 4   | PCS                                     | Not assessed                                                                           | Sufficient data | -               | Royal Bank of Canada and a Canadian Institutes of Health Research Investigator Award       |
| Yao, 2020[98]          | RCT | Outpatient | Mind+PC, PC | 24  | Not assessed                            | SF-36 (PCS)                                                                            | -               | -               | Shanghai Three Year Action Plan for Further Accelerate the Development of Chinese Medicine |

<sup>a</sup>Only studies reporting sufficient data to assess intervention compliance have been reported in this table.

<sup>b</sup>Only studies which were included in the network meta-analysis for the primary outcomes of this review (physical function and pain intensity) and reported sufficient data for assessing safety, have been summarised in this table.

Adv: advice, AqoL: Assessment of Quality of Life Questionnaire, BT: behavioural therapy, BT+PC: behavioural therapy delivered with physiotherapy care, CBT: cognitive behavioural therapy, CBT+PC: cognitive behavioural therapy delivered with physiotherapy care, CP: combined psychological approaches, CP+PC: combined psychological approaches delivered with physiotherapy care, Csl: counselling, Csl+PC: counselling delivered with physiotherapy care, CSQ: Coping Strategies Questionnaire, EQ-5D: European Quality of Life Questionnaire, FABQ: Fear Avoidance Belief Questionnaire, FABQ (PA): Fear Avoidance Belief Questionnaire physical activity sub-scale, GP: general practitioner care, HRLSS: Health-Related Life Satisfaction Scale, HRQoL: health-related quality of life, IIS: Illness Intrusiveness Scale, Mind: mindfulness, Mind+PC: mindfulness delivered with physiotherapy care, NI: no intervention, Nr: not reported, PC: physiotherapy care, PCCL: Pain Coping and Cognition List, PCS: Pain Catastrophising Scale, PE: pain education, PE+PC: pain education delivered with physiotherapy care, QOLS: Quality of Life Scale, RCT: randomised controlled trial, SF-12 (PCS): 12-item Short-form Survey (physical component summary), SF-36 : 36-item Short-form Survey, SF-36 (PCS): 36-item Short-form Survey (physical component summary), SHCI: Subjective Health Complaints Inventory, SIP: Sickness Impact Profile, TSK: Tampa Scale of Kinesiophobia, UC: usual care.

## Supplementary E. Individual patient characteristics of included studies

**Supplementary Table 4.** Individual patient characteristics of studies included in the network meta-analysis for physical function and pain intensity

| Author, Year                   | Sample size | Mean age (years)        | Sex (% male)            | Physical function                  |                | Pain intensity                |                |
|--------------------------------|-------------|-------------------------|-------------------------|------------------------------------|----------------|-------------------------------|----------------|
|                                |             |                         |                         | Scale                              | Baseline score | Scale                         | Baseline score |
| Alaranta, 1994[2]              | 293         | 40.45                   | 45.39                   | PDI (Million) (0-100)              | 44.8           | Not assessed                  | -              |
| Aliyu, 2018[3]                 | 46          | 42.32                   | 43.26                   | ODI (0-100)                        | 45.8           | VAS (0-10)                    | 6.2            |
| Bagheri, 2020[5]               | 45          | 37.23                   | 0                       | RMDQ (0-100)                       | 37.9           | Nr                            | -              |
| Bendix, 2000[8]                | 138         | 40.54                   | 34.65                   | MRS (disability subscale) (0-30)   | 16.0           | Box Scale (0-10)              | 5.6            |
| Cherkin, 2016[11]              | 342         | 49.30                   | 65.68                   | RMDQ (0-23)                        | 11.4           | GCPS (0-10)                   | 5.9            |
| Chiauzzi, 2010[12]             | 209         | 46.14                   | 32.32                   | ODI (0-100)                        | 46.0           | BPI (0-10)                    | 5.6            |
| Christiansen, 2010[13]         | 75          | 47.75                   | 38.50                   | Hannover ADL Questionnaire (0-100) | 65.9           | NRS (0-10)                    | 5.8            |
| Dufour, 2010[15]               | 286         | 40.88                   | 43.77                   | RMDQ (0-24)                        | 12.5           | VAS (0-100)                   | 57.3           |
| Farokhi, 2020[17]              | 40          | 28.33                   | 0.00                    | ODI (0-100)                        | 28.1           | Not assessed                  | -              |
| Friedrich, 1998[18] & 2005[19] | 93          | 44.12                   | 49.47                   | LBOS (0-75)                        | 42.7           | LBOS (pain sub-scale) (0-100) | 52.5           |
| Frost, 1998[20]                | 81          | 37.80                   | 45.16                   | ODI (0-100)                        | 24.0           | Not assessed                  | -              |
| Galan-Martin, 2020[21]         | 154         | Nr for chronic LBP only | Nr for chronic LBP only | RMDQ (0-24)                        | 9.0            | VAS (0-100)                   | 71.2           |
| Gannon, 2019[22] (Study 1)     | 66          | 53.30                   | 61.60                   | RMDQ (0-24)                        | 10.2           | NRS (0-10)                    | 5.3            |
| Gannon, 2019[22] (Study 2)     | 67          | 62.40                   | 88.20                   | RMDQ (0-24)                        | 11.2           | NRS (0-10)                    | 5.0            |
| Gardner, 2019[23]              | 75          | 44.49                   | 42.92                   | QBPDS (0-100)                      | 42.9           | NRS (0-10)                    | 6.4            |
| Ghadyani, 2017[24]             | 136         | 37.67                   | 27.24                   | RMDQ (0-24)                        | 6.8            | VAS (0-10)                    | 4.5            |
| Gibbs, 2018[25]                | 27          | 51.48                   | 22.22                   | ODI (0-100)                        | 24.1           | VAS (0-10)                    | 4.8            |
| Godfrey, 2019[28]              | 248         | 47.90                   | 40.70                   | RMDQ (0-24)                        | 10.8           | PNAS (0-10)                   | 6.0            |
| Gould, 2020[29]                | 72          | 57.12                   | 87.33                   | RMDQ (0-24)                        | 11.7           | DDS (0-20)                    | 10.7           |
| Haas, 2005[31]                 | 120         | 77.20                   | 15.60                   | MVK (disability sub-scale) (0-100) | 42.1           | MVK (pain sub-scale) (0-100)  | 48.8           |
| Harris, 2017[32]               | 215         | 44.81                   | 49.52                   | ODI (0-100)                        | 28.7           | Not assessed                  | -              |
| Jensen, 2012[33]               | 300         | 45.39                   | 45.09                   | RMDQ (0-23)                        | 11.4           | NRS (0-10)                    | 6.4            |
| Johnson, 2007[34]              | 234         | 47.91                   | 40.17                   | RMDQ (0-24)                        | 10.8           | VAS (0-100)                   | 48.3           |
| Khan, 2014[36]                 | 54          | 39.61                   | 46.30                   | RMDQ (0-24)                        | 13.3           | VAS (0-10)                    | 6.8            |

|                                |     |       |        |               |      |                              |      |
|--------------------------------|-----|-------|--------|---------------|------|------------------------------|------|
| Khodadad, 2020[37]             | 54  | 44.30 | 100.00 | Not assessed  | -    | VAS (0-10)                   | 5.8  |
| Krein, 2013[38]                | 229 | 51.56 | 87.45  | RMDQ (0-24)   | 9.5  | NRS (0-10)                   | 6.1  |
| Lamb, 2010[39, 40]             | 701 | 54.00 | 40.09  | RMDQ (0-24)   | 9.0  | MVK (pain sub-scale) (0-100) | 59.0 |
| Lambeek, 2010[41]              | 134 | 46.16 | 58.06  | RMDQ (0-24)   | 14.9 | NRS (0-10)                   | 6.0  |
| Leeuw, 2008[42]                | 85  | 45.32 | 51.80  | RMDQ (0-24)   | 14.7 | VAS (0-100)                  | 53.6 |
| Lorig, 2002[44]                | 580 | 45.51 | 61.51  | RMDQ (0-24)   | 9.9  | VAS (0-10)                   | 3.9  |
| Louw, 2017[45]                 | 62  | 60.14 | 43.55  | Not assessed  | -    | NRS (0-10)                   | 4.0  |
| Macedo, 2012[46]               | 172 | 49.15 | 40.70  | RMDQ (0-24)   | 11.3 | NRS (0-10)                   | 6.1  |
| Magalhaes, 2017[47]            | 66  | 46.90 | 25.76  | RMDQ (0-24)   | 13.3 | NRS (0-10)                   | 7.4  |
| Magnussen, 2007[48]            | 89  | 49.05 | 37.08  | RMDQ (0-24)   | 14.0 | Not assessed                 | -    |
| Mehling, 2005[49]              | 36  | 49.27 | 35.73  | RMDQ (0-24)   | 10.0 | VAS (0-10)                   | 4.8  |
| Monticone, 2013[51]            | 90  | 49.34 | 42.22  | RMDQ (0-24)   | 15.1 | NRS (0-10)                   | 7.0  |
| Monticone, 2016[52]            | 150 | 53.50 | 38.67  | ODI (0-100)   | 33.4 | NRS (0-10)                   | 6.3  |
| Moore, 2000[53]                | 226 | 49.45 | 46.02  | RMDQ (0-24)   | 8.4  | NRS (0-10)                   | 5.3  |
| Morone, 2016[54]               | 282 | 74.50 | 33.70  | RMDQ (0-24)   | 15.5 | NRS (0-20)                   | 10.7 |
| Moseley, 2004[57]              | 58  | 43.40 | 43.10  | RMDQ (0-18)   | 15.0 | Not assessed                 | -    |
| Nguyen, 2017[58]               | 88  | 47.00 | 41.38  | RMDQ (0-18)   | 49.3 | NRS (0-100)                  | 58.3 |
| Nicholas, 1991[59]             | 62  | 41.20 | 48.28  | Not assessed  | -    | PRC (0-5)                    | 2.9  |
| O'Keeffe, 2020[60]             | 206 | 48.71 | 26.73  | ODI (0-100)   | 32.8 | NRS (0-10)                   | 5.9  |
| Paolucci, 2017[61]             | 53  | 60.95 | 20.75  | Not assessed  | -    | VAS (0-10)                   | 5.4  |
| Pardo, 2018[62]                | 56  | 47.05 | 21.42  | RMDQ (0-24)   | 12.3 | NRS (0-10)                   | 7.9  |
| Petrozzi, 2019[63]             | 108 | 50.40 | 50.00  | RMDQ (0-24)   | 9.9  | NRS (0-10)                   | 5.0  |
| Pires, 2015[64]                | 62  | 50.95 | 35.48  | QBPDs (0-100) | 30.1 | VAS (0-100)                  | 42.9 |
| Poole, 2007[65]                | 243 | 46.72 | 40.60  | ODI (0-100)   | 34.2 | VAS (0-100)                  | 41.9 |
| Rabiei, 2020[66]               | 80  | 43.31 | 46.57  | RMDQ (0-24)   | 14.8 | VAS (0-10)                   | 6.4  |
| Reiner, 2019[67]               | 67  | 58.03 | 27.78  | Not assessed  | -    | BPI (0-10)                   | 4.8  |
| Rizzo, 2018[69]                | 100 | 50.05 | 20.00  | RMDQ (0-24)   | 14.1 | NRS (0-10)                   | 6.9  |
| Sander, 2020[71]               | 295 | 52.80 | 37.63  | ODI (0-100)   | 27.1 | NRS (0-10)                   | 1.6  |
| Santaella da Fonseca, 2009[72] | 60  | 46.39 | 28.33  | RMDQ (0-24)   | 11.3 | VAS (0-10)                   | 5.3  |



|                       |     |       |       |                         |      |                                   |      |
|-----------------------|-----|-------|-------|-------------------------|------|-----------------------------------|------|
| Saper, 2017[73]       | 191 | 45.66 | 40.31 | RMDQ (0-23)             | 14.3 | NRS (0-10)                        | 7.1  |
| Saracoglu, 2020[74]   | 69  | 40.42 | 52.63 | ODI (0-100)             | 33.7 | NRS (0-10)                        | 7.4  |
| Saracoglu, 2020[75]   | 36  | 39.36 | 51.43 | Not assessed            | -    | NRS (0-10)                        | 7.2  |
| Schaller, 2016[76]    | 412 | 50.42 | 69.42 | Not assessed            | -    | SF-36 (bodily pain scale) (1-6)   | 4.6  |
| Shariat, 2019[77]     | 76  | 35.39 | 69.44 | Not assessed            | -    | FRI (range of scores unclear)     | 12.8 |
| Siemonsma, 2013[78]   | 156 | 46.10 | 46.10 | QBPDS (0-100)           | 40.4 | Not assessed                      | -    |
| Smeets, 2008[79]      | 172 | 41.91 | 54.07 | RMDQ (0-24)             | 13.8 | VAS (0-100)                       | 48.6 |
| Soleymani, 2021[81]   | 30  | 41.97 | 14.95 | Not assessed            | -    | CPGQ (0-100)                      | 38.1 |
| Sorensen, 2010[82]    | 207 | 39.00 | 48.00 | Not assessed            | -    | NRS (0-10)                        | 6.2  |
| Stuckey, 1986[83]     | 24  | 41.10 | 45.83 | ADL Questionnaire (1-7) | 2.4  | PIQ (0-100)                       | 35.2 |
| Tavafian, 2017[85]    | 197 | 46.02 | 19.18 | RMDQ (0-24)             | 10.0 | SF-36 (bodily pain scale) (1-100) | 45.8 |
| Tekur, 2008[86]       | 91  | 48.50 | 55.00 | ODI (0-100)             | 37.7 | Not assessed                      | -    |
| Tilbrook, 2011[87]    | 313 | 46.35 | 29.71 | RMDQ (0-24)             | 7.8  | Not assessed                      | -    |
| Turner, 1982[88]      | 36  | 42.00 | 8.33  | Not assessed            | -    | VAS (0-100)                       | 56.0 |
| Turner, 1988[89]      | 81  | 46.00 | 62.96 | Not assessed            | -    | MPQ (0-78)                        | 21.4 |
| Turner, 1990[90]      | 96  | 44.00 | 52.08 | Not assessed            | -    | VAS (0-100)                       | 50.5 |
| Turner, 1993[91]      | 102 | 42.00 | 46.07 | Not assessed            | -    | VAS (0-100)                       | 54.5 |
| Unal, 2020[92]        | 40  | 41.93 | 50.00 | RMDQ (0-24)             | 15.8 | MPQ (0-78)                        | 52.0 |
| Vibe Fersum, 2019[94] | 121 | 43.00 | 47.62 | ODI (0-100)             | 22.8 | NRS (0-10)                        | 5.0  |
| Von Korff, 2005[95]   | 240 | 49.75 | 37.52 | RMDQ (0-23)             | 11.8 | NRS (0-10)                        | 5.8  |
| Vong, 2011[96]        | 88  | 44.85 | 36.84 | RMDQ (0-24)             | 10.0 | VAS (0-10)                        | 5.3  |
| Woods, 2008[97]       | 83  | 46.45 | 34.09 | PDI (0-100)             | 22.2 | MPQ-SF (PRI) (0-45)               | 14.8 |
| Yao, 2020[98]         | 72  | 53.40 | 19.44 | Not assessed            | -    | VAS (0-10)                        | 5.1  |

ADL: Activities of Daily Living, BPI: Brief Pain Inventory, CPGQ: Chronic Pain Grade Questionnaire, DDS: Descriptor Differential Scale, FRI: Functional Rating Index Test, GCPS: Graded Chronic Pain Scale, LBOS: Low Back Outcome Score, MPQ: McGill Pain Questionnaire, MPQ-SF: McGill Pain Questionnaire Short Form, MPQ-SF (PRI): McGill Pain Questionnaire Pain Rating Index, MRS: Manniche's Rating Scale, MVK: Modified Von Korff Scale, Nr: not reported, NRS: Numeric Rating Scale, ODI: Oswestry Disability Index, PDI: Pain Disability Index, PDI (Million): Pain Disability Index Million, PIQ: Pain Intensity Questionnaire, PNAS: Pain Numeric Analogue Scale, PRC: Pain Rating Chart, QBPDS: Quebec Back Pain Disability Scale, RMDQ: Roland Morris Disability Questionnaire, SF-36: 36-Item Short Form Survey, VAS: Visual Analogue Scale.

**Supplementary Table 5.** Individual patient characteristics of studies included in the network meta-analysis for fear avoidance

| Author, Year              | Total sample size | Mean age (years)             | Sex (% male)                 | Fear avoidance scale                     | Baseline fear avoidance score |
|---------------------------|-------------------|------------------------------|------------------------------|------------------------------------------|-------------------------------|
| Aliyu, 2018[3]            | 46                | 42.3                         | 43                           | FABQ (PA) (0-24)                         | 17.7                          |
| Chiauzzi, 2010[12]        | 209               | 46.1                         | 32                           | FABQ (PA) (0-24)                         | 14.9                          |
| Galan-Martin, 2020[21]    | 154               | Nr for chronic LBP sub-group | Nr for chronic LBP sub-group | PCS (0-52)                               | 29.5                          |
| Gannon 2019[22] (Study 1) | 66                | 53.3                         | 62                           | PCS (0-52)                               | 17                            |
| Gannon 2019[22] (Study 2) | 67                | 62.4                         | 88                           | PCS (0-52)                               | 14                            |
| Gardner, 2019[23]         | 75                | 44.5                         | 43                           | TSK (17-68)                              | 38.3                          |
| Harris, 2017[32]          | 215               | 44.8                         | 50                           | FABQ (PA) (0-24)                         | 12.2                          |
| Krein, 2013[38]           | 229               | 51.6                         | 87                           | FABQ (PA) (0-24)                         | 14.5                          |
| Lamb, 2010[39]            | 701               | 54.0                         | 40                           | FABQ (PA) (0-24)                         | 13.6                          |
| Leeuw, 2008[42]           | 85                | 45.3                         | 52                           | PCS (0-52)                               | 22.9                          |
| Magalhaes, 2017[47]       | 66                | 46.9                         | 26                           | TSK (17-68)                              | 44                            |
| Magnussen, 2007[48]       | 89                | 49.1                         | 37                           | FABQ (PA) (0-24)                         | 14.4                          |
| Monticone, 2013[51]       | 90                | 49.3                         | 42                           | TSK (13-52)                              | 41.7                          |
| Monticone, 2016[52]       | 150               | 53.5                         | 39                           | PCS (0-52)                               | 27.1                          |
| Moore, 2000[53]           | 226               | 49.5                         | 46                           | TSK (1-4)                                | 2.3                           |
| Morone, 2016[54]          | 282               | 74.5                         | 34                           | CSQ (catastrophising scale) (0-6)        | 1.2                           |
| Moseley, 2004[57]         | 58                | 43.4                         | 43                           | PCS (0-52)                               | 37.5                          |
| O'Keeffe, 2020[60]        | 206               | 48.7                         | 27                           | FABQ (PA) (0-24)                         | 15.1                          |
| Pardo, 2018[62]           | 56                | 47.1                         | 21                           | PCS (0-52)                               | 33.1                          |
| Petrozzi, 2019[63]        | 108               | 50.4                         | 50                           | PCS (0-52)                               | 20.5                          |
| Pires, 2015[64]           | 62                | 51.0                         | 35                           | TSK (13-52)                              | 28.9                          |
| Rabiei, 2020[66]          | 80                | 43.3                         | 47                           | FABQ (PA) (0-24)                         | 16.5                          |
| Rizzo, 2018[69]           | 100               | 50.1                         | 20                           | PCS (0-52)                               | 28.5                          |
| Saracoglu, 2020[74]       | 69                | 40.4                         | 53                           | TSK (17-68)                              | 45                            |
| Sorensen, 2010[82]        | 207               | 39.0                         | 48                           | FABQ (PA) (0-24)                         | 13                            |
| Spinhoven, 2004[80]       | 148.00            | 39.8                         | 36                           | PCCL (catastrophising sub-scale) (12-72) | 40.7                          |

|                       |     |      |    |                  |      |
|-----------------------|-----|------|----|------------------|------|
| Vibe Fersum, 2019[94] | 121 | 43.0 | 48 | FABQ (PA) (0-24) | 11.5 |
| Von Korff, 2005[95]   | 240 | 49.8 | 38 | TSK (17-68)      | 41.3 |
| Woods, 2008[97]       | 83  | 46.5 | 34 | PCS (0-52)       | 19.6 |

CSQ: Coping Strategies Questionnaire, FABQ: Fear Avoidance Belief Questionnaire, FABQ (PA): Fear Avoidance Belief Questionnaire physical activity sub-scale, Nr: not reported, PCCL: Pain Coping and Cognition List, PCS: Pain Catastrophising Scale, TSK: Tampa Scale of Kinesiophobia.

## Supplementary F. Summary of physiotherapy care treatment node

The following table provides a summary of all studies included in the review, for which at least one intervention arm involved physiotherapy care as a non-psychological co-intervention or comparison intervention. We delineated between instances where the physiotherapy care node consisted of exercise alone (“exs”), passive therapy alone (“passive”), or exercise delivered with passive therapy (“exs+passive”).

**Supplementary Table 6.** Summary of individual studies involving physiotherapy care as a co-intervention or comparison intervention

| Author, Year                   | Total study arms included <sup>a</sup> | Study arms involving physiotherapy care |                              | Non-physiotherapy care arm(s) |
|--------------------------------|----------------------------------------|-----------------------------------------|------------------------------|-------------------------------|
|                                |                                        | As a co-intervention                    | As a comparison intervention |                               |
| Alaranta, 1994[2]              | 2                                      | CBT+exs                                 | Exs+passive                  | -                             |
| Aliyu, 2018[3]                 | 2                                      | CBT+exs                                 | Exs                          | -                             |
| Bagheri, 2020[5]               | 2                                      | Comb psych+exs                          | Exs                          | -                             |
| Bendix, 2000[8]                | 2                                      | CBT+exs                                 | Exs                          | -                             |
| Christiansen, 2010[13]         | 2                                      | CBT+exs+passive; PE+exs+passive         | -                            | -                             |
| Dufour, 2010[15]               | 2                                      | Comb psych+exs                          | Exs                          | -                             |
| Farokhi, 2020[17]              | 2                                      | Comb psych+exs; BT+exs                  | -                            | -                             |
| Friedrich, 1998[18] & 2005[19] | 2                                      | Comb psych+exs                          | Exs                          | -                             |
| Frost, 1998[20]                | 2                                      | CBT+exs                                 | Exs                          | -                             |
| Galan-Martin, 2020[21]         | 2                                      | PE+exs                                  | Exs+passive                  | -                             |
| Gannon, 2019[22] (Study 1)     | 2                                      | Comb psych+exs                          | -                            | Comb psych                    |
| Gannon, 2019[22] (Study 2)     | 2                                      | Comb psych+exs                          | -                            | Comb psych                    |
| Gardner, 2019[23]              | 2                                      | -                                       | Exs                          | PE                            |
| Ghadyani, 2017[24]             | 2                                      | CBT+exs                                 | -                            | Advice                        |
| Godfrey, 2019[28]              | 2                                      | Mindfulness+exs+passive                 | Exs+passive                  | -                             |
| Harris, 2017[32]               | 3                                      | Comb psych+exs                          | -                            | Comb psych (2 arms pooled)    |
| Khan, 2014[36]                 | 2                                      | CBT+exs                                 | Exs                          | -                             |
| Khodadad, 2020[37]             | 3                                      | Comb psych+exs                          | Exs                          | Exs+passive                   |
| Louw, 2017[45]                 | 2                                      | PE+passive                              | Passive                      | -                             |
| Macedo, 2012[46]               | 2                                      | Comb psych+exs                          | -                            | Comb psych                    |
| Magalhaes, 2017[47]            | 2                                      | Comb psych+exs+passive                  | Exs                          | -                             |

|                       |   |                                                 |                                         |        |
|-----------------------|---|-------------------------------------------------|-----------------------------------------|--------|
| Mehling, 2005[49]     | 2 | Mindfulness+exs                                 | Exs+passive                             | -      |
| Monticone, 2013[51]   | 2 | CBT+exs                                         | Exs+passive                             | -      |
| Monticone, 2016[52]   | 2 | CBT+exs                                         | Exs+passive                             | -      |
| Nguyen, 2017[58]      | 2 | PE+exs                                          | -                                       | PE     |
| Nicholas, 1991[59]    | 6 | BT+exs (2 arms pooled); CBT+exs (3 arms pooled) | -                                       | Exs    |
| O'Keeffe, 2020[60]    | 2 | CBT+exs; Comb psych+exs                         | -                                       | -      |
| Paolucci, 2017[61]    | 2 | Mindfulness+exs                                 | Exs                                     | -      |
| Pardo, 2018[62]       | 2 | PE+exs                                          | Exs                                     | -      |
| Petrozzi, 2019[63]    | 2 | CBT+exs+passive                                 | Exs+passive                             | -      |
| Pires, 2015[64]       | 2 | PE+exs                                          | Exs                                     | -      |
| Poole, 2007[65]       | 3 | -                                               | Passive                                 | BT, UC |
| Rabiei, 2020[66]      | 2 | PE+exs                                          | Exs                                     | -      |
| Petrozzi, 2019[63]    | 2 | CBT+exs                                         | -                                       | NI     |
| Pires, 2015[64]       | 2 | Mindfulness+exs                                 | -                                       | PE     |
| Saracoglu, 2020[74]   | 3 | PE+exs+passive                                  | Exs+passive;<br>Passive (2 arms pooled) | -      |
| Saracoglu, 2020[75]   | 2 | PE+passive                                      | Passive                                 | -      |
| Shariat, 2019[77]     | 4 | BT+exs                                          | Exs                                     | BT; NI |
| Smeets, 2008[79]      | 3 | CBT+exs                                         | Exs                                     | CBT    |
| Sorensen, 2010[82]    | 2 | PE+exs                                          | Exs                                     | -      |
| Tekur, 2008[86]       | 2 | Csl+exs; PE+exs                                 | -                                       | -      |
| Tilbrook, 2011[87]    | 2 | Comb psych+exs                                  | -                                       | PE     |
| Turner, 1990[90]      | 4 | BT+exs                                          | Exs                                     | BT; NI |
| Unal, 2020[92]        | 2 | -                                               | Passive                                 | PE     |
| Vibe Fersum, 2019[94] | 2 | CBT+exs                                         | Exs+passive                             | -      |
| Vong, 2011[96]        | 2 | Csl+exs+passive                                 | Exs+passive                             | -      |
| Yao, 2020[98]         | 2 | Mindfulness+exs                                 | Exs                                     | -      |

<sup>a</sup>Total study arms included in the network meta-analysis.

BT: behavioural therapy, CBT: cognitive behavioural therapy, Comb psych: combined psychological approaches, Csl: counselling, Exs: exercise, NI: no intervention, PE: pain education, Passive: passive therapy, UC: usual care.

## Supplementary G. Studies not included in the network meta-analysis

### Studies not included in the network meta-analysis for the primary outcomes

Overall, 20 articles reporting data on 21 unique studies were not included in the network meta-analysis (NMA) for physical function and/or pain intensity. Out of the excluded studies, 19 unique studies reported data on physical function and 20 unique studies reported data on pain intensity. Reasons for exclusion from the NMA included: only compared the same type of psychological intervention with no other comparison interventions (e.g., comparison of group and individual cognitive behavioural therapy interventions) (13 studies); insufficient data available for pooling (five studies); only involved comparison interventions which did not match our treatment node definitions (three studies).

#### *Exclusion reason 1: Studies only comparing the same type of psychological intervention with no other comparison interventions*

Studies which only compared the same type of psychological interventions, with no other comparison interventions, evaluated the following: combined psychological approaches delivered with physiotherapy care (three studies);[4, 30, 43] pain education delivered with physiotherapy care (three studies);[50, 56, 99] combined psychological approaches (two studies, with one involving three arms);[27, 68] cognitive behavioural therapy (three studies, where two studies were reported within the same article and the third study involved three arms);[26, 70] behavioural therapy (one study);[35] pain education (one study).[10] We did not present the effect estimates of studies comparing the same type of intervention. Overall, the majority of studies found that the psychological interventions under investigation improved physical function and/or reduced pain intensity.

#### *Exclusion reason 2: Studies with insufficient data available for pooling*

Five studies did not have sufficient data available for pooling. Effect estimates for these studies are summarised in Supplementary Table 7.

#### *Exclusion reason 3: Studies only involving comparison interventions which did not match our treatment node definitions*

Three studies only involved comparison interventions which did not match our treatment node definitions. As there were no other comparison interventions matching our pre-defined treatment nodes in these studies, this precluded their inclusion in the network. Two of these studies compared cognitive behavioural therapy delivered with physiotherapy care to the same non-psychological comparison intervention (i.e., lumbar fusion surgery). The effect estimates for these studies are summarised in Supplementary Table 7.

One study compared behavioural therapy to an alternative psychological intervention (i.e., hypnosis) which did not match our initial pre-specified decision set for psychological interventions (see Supplementary B).[84] Consensus within the review team resulted in the inclusion of the study in the review, however we excluded the study from the NMA for the following reasons: (i) the intervention did not match our pre-defined treatment nodes, (ii) if included, the intervention would become disconnected from the network due insufficient studies available for comparison. The effect estimates from this study have been summarised in Supplementary Table 7.

**Supplementary Table 7.** Effect estimates for studies excluded from the network meta-analysis for physical function and pain intensity

| Study                                                                                                     | Treatment nodes                                                                | Physical function <sup>a</sup>                                                                              | Pain intensity <sup>a</sup>                                                                                                                                                                            |
|-----------------------------------------------------------------------------------------------------------|--------------------------------------------------------------------------------|-------------------------------------------------------------------------------------------------------------|--------------------------------------------------------------------------------------------------------------------------------------------------------------------------------------------------------|
| <b>Studies with insufficient data available for pooling</b>                                               |                                                                                |                                                                                                             |                                                                                                                                                                                                        |
| Bendix, 1998[6] & 1998[7]<br>(Project A)                                                                  | CP+PC vs NI                                                                    | 2-year follow-up: p = 0.90<br>5-year follow-up: p = 0.20                                                    | 2-year follow-up: p = 0.08<br>5-year follow-up: p = 1.00                                                                                                                                               |
| Bendix, 1998[6] & 1998[7]<br>(Project B)                                                                  | CP+PC vs PC vs CBT+PC                                                          | 2-year follow-up: <b>p = 0.003 (favouring CP+PC)</b><br>5-year follow-up: <b>p = 0.02 (favouring CP+PC)</b> | 2-year follow-up: <b>p = 0.08 (favouring CP+PC)</b><br>5-year follow-up: p = 0.30                                                                                                                      |
| Moseley, 2002[55]                                                                                         | PE+PC vs GP care                                                               | <b>3.9 (2.30 to 5.80), p = 0.03 (favouring PE+PC)</b>                                                       | <b>1.50 (0.70 to 2.30), p = 0.03 (favouring PE+PC)</b>                                                                                                                                                 |
| Spinhoven 2004[80]                                                                                        | CBT vs CP vs NI                                                                | Not assessed                                                                                                | Psychological intervention groups combined<br>(CBT and CP) vs NI: p > 0.05                                                                                                                             |
| van der Roer, 2008[93]                                                                                    | BT+PC vs PC                                                                    | Overall effect: $\chi^2 = 0.98$ ; 4df, p = 0.91                                                             | Overall effect: $\chi^2 = 5.21$ ; 4df, p = 0.27                                                                                                                                                        |
| <b>Studies only involving comparison interventions which did not match our treatment node definitions</b> |                                                                                |                                                                                                             |                                                                                                                                                                                                        |
| Brox, 2003[9]                                                                                             | CBT+PC vs Lumbar Fusion                                                        | 2.30 (-6.70 to 11.40), p = 0.33                                                                             | 8.6 (-3.0 to 20.1), p = 0.14                                                                                                                                                                           |
| Fairbank, 2005[16]                                                                                        | CBT+PC vs Lumbar Fusion                                                        | <b>-4.10 (-8.10 to -0.10), p = 0.045 (favouring lumbar fusion)</b>                                          | 4.1 (-1.67 to 10.0), p = 0.16                                                                                                                                                                          |
| Tan, 2015[84]                                                                                             | BT vs Hypnosis (HYP-8) vs<br>Hypnosis (HYP-PRAC-8) vs<br>Hypnosis (HYP-PRAC-2) | Not assessed                                                                                                | Hypnosis groups pooled vs BT: <b>F 4.29 (df 1, 98), <math>\eta^2</math> 0.04, p &lt; 0.05 (favouring hypnosis)</b><br>HYP-8 vs HYP-PRAC-8 vs HYP-PRAC-2: F<br>1.18 (df 2, 72), $\eta^2$ 0.03, p > 0.05 |

<sup>a</sup> Values are mean difference between groups (95% confidence interval), unless stated otherwise.

BT: behavioural therapy, BT+PC: behavioural therapy delivered with physiotherapy care, CBT: cognitive behavioural therapy, CBT+PC: cognitive behavioural therapy delivered with physiotherapy care, CP: combined psychological approaches, CP+PC: combined psychological approaches delivered with physiotherapy care, GP care: general practitioner care, NI: no intervention, PC: physiotherapy care, PE+PC: pain education delivered with physiotherapy care. Estimates in bold denote significance at  $p < 0.05$ .

### **Studies not included in the network meta-analysis for the secondary outcomes**

Overall, out of 37 unique studies assessing fear avoidance, eight studies were not included in the NMA for fear avoidance. Reasons for exclusion from the NMA included: only compared the same type of psychological intervention with no other comparison interventions (two studies); insufficient data available for pooling (two studies); only involved comparison interventions which did not match our treatment node definitions (one study); ambiguous methods used to score the Fear Avoidance Beliefs Questionnaire (FABQ) (three studies).

#### *Exclusion reason 1: Studies only comparing the same type of psychological intervention with no other comparison interventions*

Two studies involved the comparison of two interventions coded as the same type of psychological intervention, with no other comparison interventions.[30, 43] Both studies evaluated combined psychological interventions delivered with physiotherapy care, compared with another intervention involving combined psychological interventions delivered with physiotherapy care. Overall, both studies demonstrated within-group differences for fear avoidance for each intervention group; although, there were no statistically significant between-group differences following the interventions (95% confidence interval for differences between groups: -4.75 to 5.32,  $p = 0.91$ )[43] or for group-by-time interactions ( $F = 1.16$ ,  $p = 0.32$ ).[30]

#### *Exclusion reason 2: Studies with insufficient data available for pooling*

Two studies did not have sufficient data available for pooling. Effect estimates for these studies are summarised in Supplementary Table 8.

#### *Exclusion reason 3: Studies only involving comparison interventions which did not match our treatment node definitions*

One study involved a comparison intervention which did not match our treatment node definitions. As there were no other comparison interventions matching our pre-defined treatment nodes, this precluded inclusion of the study in the network. The study compared cognitive behavioural therapy delivered with physiotherapy care to lumbar fusion surgery). The effect estimates for this study is presented in Supplementary Table 8.

#### *Exclusion reason 4: Studies using ambiguous methods to score the FABQ*

Three studies were excluded from the NMA for fear avoidance due to using ambiguous methods to score the FABQ, which were inconsistent with validated recommendations. Explicitly, results of the (two) sub-scales of the FABQ, work and physical activity sub-scales, should be presented and/or analysed independently.[100, 101] However, in these three studies, study authors presented a combined (overall) score.[17, 92] Consensus within the review team resulted in the exclusion of these studies to minimise potential heterogeneity for assessing fear avoidance. These studies compared: (i) combined psychological approaches delivered with physiotherapy care, with physiotherapy care;[5] (ii) combined psychological approaches delivered with physiotherapy care, with behavioural therapy delivered with physiotherapy care[17], (iii) pain education alone with physiotherapy care alone.[92] The effect estimates for these studies are presented below in Supplementary Table 8.



**Supplementary Table 8.** Effect estimates for studies excluded from the network meta-analysis for fear avoidance

| Study                                                                                                     | Treatment Nodes         | Fear avoidance <sup>a</sup>                                                                                                                                                                |
|-----------------------------------------------------------------------------------------------------------|-------------------------|--------------------------------------------------------------------------------------------------------------------------------------------------------------------------------------------|
| <b>Studies with insufficient data available for pooling</b>                                               |                         |                                                                                                                                                                                            |
| Jensen, 2012[33]                                                                                          | Csl vs UC               | FABQ (physical activity sub-scale): <b>3.10 (1.50 to 4.70), favouring Csl.</b><br>FABQ (work sub-scale): 0.10 (-1.50 to 1.60)<br>TSK - overall effect: $\chi^2 = 1.83$ ; df = 4, p = 0.77  |
| van der Roer, 2008[93]                                                                                    | BT+PC vs PC             |                                                                                                                                                                                            |
| <b>Studies only involving comparison interventions which did not match our treatment node definitions</b> |                         |                                                                                                                                                                                            |
| Brox, 2003[9]                                                                                             | CBT+PC vs Lumbar Fusion | FABQ (physical activity sub-scale): <b>-7.70 (-11.60 to -3.80), p &lt; 0.0001, favouring CBT+PC.</b><br>FABQ (work sub-scale): <b>-8.30 (-13.70 to -3.0), p = 0.002, favouring CBT+PC.</b> |
| <b>Studies excluded due to ambiguous use of FABQ score</b>                                                |                         |                                                                                                                                                                                            |
| Bagheri, 2020 [5]                                                                                         | CP+PC vs PC             | FABQ (no sub-scale scores provided, no overall range of scores provided): -23.05 (-30.34 to 8.45), p = 0.02                                                                                |
| Farokhi, 2020[17]                                                                                         | CP+PC vs BT+PC          | FABQ (no sub-scale scores provided, no overall range provided): <b>p &lt; 0.05, favouring CP+PC.</b>                                                                                       |
| Unal, 2020[92]                                                                                            | PE vs PC                | FABQ score (no sub-scale scores provided, only reporting an overall score range of 0 to 60): <b>p = &lt; 0.001, favouring PE.</b>                                                          |

<sup>a</sup> Values are mean difference between groups (95% confidence interval), unless stated otherwise.

Csl: counselling, BT+PC: behavioural therapy delivered with physiotherapy care, CBT+PC: cognitive behavioural therapy delivered with physiotherapy care, CP+PC: combined psychological approaches delivered with physiotherapy care, FABQ: Fear Avoidance Belief Questionnaire, PC: physiotherapy care, PE: pain education, TSK: Tampa Scale of Kinesiophobia, UC: usual care. Estimates in bold denote significance at  $p < 0.05$ .

## Supplementary H. Assessment of transitivity

**Supplementary Table 9.1** Assessment of transitivity: network of interventions for improving physical function

| Comparisons  | n studies | Mode study setting <sup>a</sup> | Intervention duration (weeks) | Mode mean age (years) | Mode sex (% males) | Outcome measures              |
|--------------|-----------|---------------------------------|-------------------------------|-----------------------|--------------------|-------------------------------|
| Adv:BT       | 1         | Outpatient                      | Unclear (8 sessions)          | <50                   | <50%               | ADL Questionnaire             |
| Adv:CBT      | 1         | Outpatient (Online only)        | 4                             | <50                   | <50%               | ODI                           |
| Adv:CBT+PC   | 1         | Outpatient                      | 1 day                         | <50                   | <50%               | RMDQ                          |
| Adv:Mind     | 1         | Outpatient                      | 8                             | ≥50                   | <50%               | RMDQ                          |
| Adv:PE       | 1         | Outpatient                      | 2-3                           | <50                   | <50%               | RMDQ                          |
| BT:CBT       | 2         | Outpatient                      | 4-13                          | <50                   | <50%, ≥50%         | PDI, RMDQ                     |
| BT:NI        | 1         | Outpatient                      | 4                             | <50                   | <50%               | PDI                           |
| BT:PC        | 1         | Outpatient                      | 6                             | <50                   | <50%               | ODI                           |
| BT:UC        | 1         | Outpatient                      | 6                             | <50                   | <50%               | ODI                           |
| BT+PC:CP+PC  | 1         | Outpatient                      | 8                             | <50                   | <50%               | ODI                           |
| CBT:CBT+PC   | 1         | Outpatient                      | 10                            | <50                   | ≥50%               | RMDQ                          |
| CBT:GP       | 1         | Outpatient                      | 6                             | <50                   | <50%               | RMDQ                          |
| CBT:Mind     | 1         | Outpatient                      | 8                             | <50                   | ≥50%               | RMDQ                          |
| CBT:NI       | 3         | Outpatient                      | 4-12                          | <50                   | <50%               | PDI, QBPDS, RMDQ              |
| CBT:PC       | 1         | Outpatient                      | 10                            | <50                   | ≥50%               | RMDQ                          |
| CBT:UC       | 1         | Outpatient                      | 8                             | <50                   | ≥50%               | RMDQ                          |
| CBT+PC:CP+PC | 1         | Outpatient                      | 12                            | <50                   | <50%               | ODI                           |
| CBT+PC:NI    | 1         | Outpatient                      | 8                             | <50                   | <50%               | RMDQ                          |
| CBT+PC:PC    | 10        | Outpatient                      | 3-52                          | <50                   | <50%               | MRS, ODI, PDI (Million), RMDQ |
| CBT+PC:PE+PC | 1         | Outpatient                      | 3                             | <50                   | <50%               | Hannover ADL Questionnaire    |
| CP:GP        | 3         | Outpatient                      | 2-12                          | <50                   | <50%               | RMDQ                          |
| CP:NI        | 3         | Outpatient                      | 6-24                          | ≥50                   | <50%               | MVK, ODI, RMDQ                |

|              |   |                          |                                                                      |     |            |                  |
|--------------|---|--------------------------|----------------------------------------------------------------------|-----|------------|------------------|
| CP:PE        | 1 | Outpatient               | 2                                                                    | ≥50 | <50%       | RMDQ             |
| CP:UC        | 3 | Outpatient               | 4-19                                                                 | <50 | <50%       | ODI, RMDQ        |
| CP+PC:PC     | 4 | Outpatient               | 3.5-12                                                               | <50 | <50%       | LBOS, RMDQ       |
| CP+PC:PE     | 1 | Outpatient               | 12                                                                   | <50 | <50%       | RMDQ             |
| Csl:NI       | 1 | Outpatient (Online only) | Unclear (self-directed website access and e-community)               | ≥50 | ≥50%       | RMDQ             |
| Csl:UC       | 1 | Outpatient               | 12                                                                   | <50 | <50%       | RMDQ             |
| Csl+PC:PC    | 1 | Outpatient               | 8                                                                    | <50 | <50%       | RMDQ             |
| Csl+PC:PE+PC | 1 | Inpatient                | 1                                                                    | <50 | ≥50%       | ODI              |
| Mind:UC      | 1 | Outpatient               | 8                                                                    | <50 | ≥50%       | RMDQ             |
| Mind+PC:PC   | 2 | Outpatient               | 4-8                                                                  | <50 | <50%       | RMDQ             |
| Mind+PC:PE   | 1 | Outpatient               | 12 week treatment phase + 40 week maintenance phase                  | <50 | <50%       | RMDQ             |
| PC:UC        | 1 | Outpatient               | 6                                                                    | <50 | <50%       | ODI              |
| PE:PC        | 2 | Outpatient               | 8                                                                    | <50 | <50%, ≥50% | QBPDS, RMDQ      |
| PE:PE+PC     | 1 | Inpatient                | 5 days                                                               | <50 | <50%       | RMDQ             |
| PE:UC        | 1 | Outpatient (Online only) | Unclear (moderated email discussion group, pain education resources) | <50 | ≥50%       | RMDQ             |
| PE+PC:PC     | 5 | Outpatient               | 4-11                                                                 | <50 | <50%       | ODI, QBPDS, RMDQ |

<sup>a</sup> Categories for mode study setting were inpatient, outpatient, and outpatient (online only). ADL: activities of daily living, Adv: advice, BT: behavioural therapy, BT+PC: behavioural therapy delivered with physiotherapy care, CBT: cognitive behavioural therapy, CBT+PC: cognitive behavioural therapy delivered with physiotherapy care, CP: combined psychological approaches, CP+PC: combined psychological approaches delivered with physiotherapy care, Csl: counselling, Csl+PC: counselling delivered with physiotherapy care, GP: general practitioner care, LBOS: Low Back Outcome Score, Mind: mindfulness, Mind+PC: mindfulness delivered with physiotherapy care, MRS: Manniche's Rating Scale, MVK: Modified Von Korff Scale, n, number: NI: no intervention, ODI: Oswestry Disability Index, PC: physiotherapy care, PDI (Million): Pain Disability Index (Million), PDI: Pain Disability Index, PE: pain education, PE+PC: pain education delivered with physiotherapy care, QBPDS: Quebec Back Pain Disability Score, RMDQ: Roland Morris Disability Questionnaire, UC: usual care.

**Supplementary Table 9.2** Assessment of transitivity: network of interventions for reducing pain intensity

| Comparisons  | n studies | Mode study setting <sup>a</sup>     | Intervention duration (weeks)                                                                                                  | Mode mean age (years) | Mode sex (% males) | Outcome measures              |
|--------------|-----------|-------------------------------------|--------------------------------------------------------------------------------------------------------------------------------|-----------------------|--------------------|-------------------------------|
| Adv:BT       | 1         | Outpatient                          | Unclear (8 sessions)                                                                                                           | <50                   | <50                | PIQ                           |
| Adv:CBT      | 1         | Outpatient                          | 4                                                                                                                              | <50                   | <50                | BPI                           |
| Adv:CBT+PC   | 1         | Outpatient                          | 1 day                                                                                                                          | <50                   | <50                | VAS                           |
| Adv:CP       | 1         | Inpatient (Hospital) and Outpatient | Unclear (Inpatient stay, aftercare delivered at 8 and 12 weeks post-discharge, self-directed internet-based aftercare program) | ≥50                   | ≥50                | SF-36 (bodily pain sub-scale) |
| Adv:Mind     | 1         | Outpatient                          | 8                                                                                                                              | ≥50                   | <50                | NRS                           |
| BT:BT+PC     | 2         | Outpatient                          | 6-8                                                                                                                            | <50                   | ≥50                | FRI, VAS                      |
| BT:CBT       | 5         | Outpatient                          | 4-8                                                                                                                            | <50                   | <50                | MPQ, MPQ-SF, VAS              |
| BT:NI        | 6         | Outpatient                          | 4-8                                                                                                                            | <50                   | <50, ≥50           | FRI, MPQ, MPQ-SF, VAS         |
| BT:PC        | 3         | Outpatient                          | 6-8                                                                                                                            | <50                   | ≥50                | FRI, VAS                      |
| BT:UC        | 1         | Outpatient                          | 6                                                                                                                              | <50                   | <50                | VAS                           |
| BT+PC:CBT+PC | 1         | Outpatient                          | 5                                                                                                                              | <50                   | <50                | PRC                           |
| BT+PC:PC     | 3         | Outpatient                          | 5-8                                                                                                                            | <50                   | ≥50                | FRI, PRC, VAS                 |
| CBT:CBT+PC   | 1         | Outpatient                          | 10                                                                                                                             | <50                   | ≥50                | VAS                           |
| CBT:GP       | 2         | Outpatient                          | 6-24                                                                                                                           | <50                   | <50                | CPGQ, VAS                     |
| CBT:Mind     | 1         | Outpatient                          | 8                                                                                                                              | <50                   | ≥50                | GCPS                          |
| CBT:NI       | 5         | Outpatient                          | 4-8                                                                                                                            | <50                   | <50                | MPQ, MPQ-DQ, MVK, VAS         |
| CBT:PC       | 1         | Outpatient                          | 10                                                                                                                             | <50                   | ≥50                | VAS                           |
| CBT:UC       | 1         | Outpatient                          | 8                                                                                                                              | <50                   | ≥50                | GCPS                          |
| CBT+PC:CP+PC | 1         | Outpatient                          | 12                                                                                                                             | <50                   | <50                | NRS                           |
| CBT+PC:NI    | 1         | Outpatient                          | 8                                                                                                                              | <50                   | <50                | VAS                           |
| CBT+PC:PC    | 9         | Outpatient                          | 3-52                                                                                                                           | <50                   | <50                | Box Scale, NRS, PRC, VAS      |
| CBT+PC:PE+PC | 1         | Outpatient                          | 3                                                                                                                              | <50                   | <50                | NRS                           |
| CP:CP+PC     | 3         | Outpatient                          | 8                                                                                                                              | ≥50                   | ≥50                | NRS                           |

|            |   |                          |                                                                      |          |          |                                         |
|------------|---|--------------------------|----------------------------------------------------------------------|----------|----------|-----------------------------------------|
| CP:GP      | 3 | Outpatient               | 2-12                                                                 | <50      | <50      | DDS, NRS, SF-36 (bodily pain sub-scale) |
| CP:NI      | 2 | Outpatient               | 6-24                                                                 | ≥50      | <50      | MVK (pain sub-scale), VAS               |
| CP:PE      | 1 | Outpatient               | 2                                                                    | ≥50      | <50      | NRS                                     |
| CP:UC      | 3 | Outpatient               | 4-19                                                                 | <50      | <50      | NRS                                     |
| CP+PC:PC   | 4 | Outpatient               | 3.5-12                                                               | <50      | <50      | LBOS (pain sub-scale), NRS, VAS         |
| Csl:NI     | 1 | Outpatient (Online only) | Unclear (self-directed website access and e-community)               | ≥50      | ≥50      | NRS                                     |
| Csl:UC     | 1 | Outpatient               | 12                                                                   | <50      | <50      | NRS                                     |
| Csl+PC:PC  | 1 | Outpatient               | 8                                                                    | <50      | <50      | VAS                                     |
| Mind:NI    | 1 | Outpatient               | 8                                                                    | ≥50      | <50      | BPI                                     |
| Mind:UC    | 1 | Outpatient               | 8                                                                    | <50      | ≥50      | GCPS                                    |
| Mind+PC:PC | 4 | Outpatient               | 4-24                                                                 | <50, ≥50 | <50      | PNAS, VAS                               |
| Mind+PC:PE | 1 | Outpatient               | 12 week treatment phase + 40 week maintenance phase                  | <50      | <50      | NRS                                     |
| PC:UC      | 1 | Outpatient               | 6                                                                    | <50      | <50      | VAS                                     |
| PE:PC      | 2 | Outpatient               | 8                                                                    | <50      | <50, ≥50 | MPQ, NRS                                |
| PE:PE+PC   | 1 | Inpatient (Spa Centre)   | 5 days                                                               | <50      | <50      | NRS                                     |
| PE:UC      | 1 | Outpatient (Online only) | Unclear (moderated email discussion group, pain education resources) | <50      | ≥50      | VAS                                     |
| PE+PC:PC   | 8 | Outpatient               | 1 day-11 weeks                                                       | <50      | <50      | NPRS, NRS, VAS                          |

<sup>a</sup> Categories for mode study setting were inpatient, outpatient, and outpatient (online only). Adv: advice, BPI: Brief Pain Inventory, BT: behavioural therapy, BT+PC: behavioural therapy delivered with physiotherapy care, CBT: cognitive behavioural therapy, CBT+PC: cognitive behavioural therapy delivered with physiotherapy care, CP: combined psychological approaches, CP+PC: combined psychological approaches delivered with physiotherapy care, CPGQ: Chronic Pain Grade Questionnaire, Csl: counselling, Csl+PC: counselling delivered with physiotherapy care, DDS: Descriptor Differential Scale, FRI: Functional Rating Index, GCPS: Graded Chronic Pain Scale, GP: general practitioner care, LBOS: Low Back Outcome Score, Mind: mindfulness, Mind+PC: mindfulness delivered with physiotherapy care, MPQ: McGill Pain Questionnaire, MPQ-SF: McGill Pain Questionnaire Short-Form, MVK: Modified Von Korff Scale, n: number, NI: no intervention, NRS: Numeric Rating Scale, PC: physiotherapy care, PE: pain education, PE+PC: pain education delivered with physiotherapy care, PIQ: Pain Intensity, PNAS: Pain Numeric Analogue Scale, PRC: Pain Rating Chart, SF-36: 36-Item Short Form Survey, UC: usual care, VAS: Visual Analogue Scale.

**Supplementary Table 9.3** Assessment of transitivity: network of interventions for reducing fear avoidance

| Comparisons  | n studies | Mode study setting <sup>a</sup> | Intervention duration (weeks)                          | Mode mean age (years) | Mode sex (% males) | Outcome measures |
|--------------|-----------|---------------------------------|--------------------------------------------------------|-----------------------|--------------------|------------------|
| Adv:CBT      | 1         | Outpatient (Online only)        | 4                                                      | <50                   | <50                | FABQ             |
| Adv:Mind     | 1         | Outpatient                      | 8                                                      | ≥50                   | <50                | CSQ              |
| Adv:PE       | 1         | Outpatient                      | 2-3                                                    | <50                   | <50                | PCS              |
| BT:CBT       | 2         | Outpatient                      | 4-13                                                   | <50                   | <50, ≥50           | PCS              |
| BT:NI        | 1         | Outpatient                      | 4                                                      | <50                   | <50                | FABQ             |
| CBT:CP       | 1         | Inpatient and Outpatient        | 10                                                     | <50                   | <50                | PCCL             |
| CBT:NI       | 3         | Outpatient                      | 4-10                                                   | <50                   | <50                | FABQ, PCCL       |
| CBT+PC:CP+PC | 1         | Outpatient                      | 12                                                     | <50                   | <50                | FABQ             |
| CBT+PC:PC    | 5         | Outpatient                      | 4-52                                                   | <50                   | <50                | FABQ, PCS, TSK   |
| CP:CP+PC     | 3         | Outpatient                      | 8-12                                                   | ≥50                   | ≥50                | FABQ, PCS        |
| CP:GP        | 1         | Outpatient                      | 2-3                                                    | <50                   | <50                | TSK              |
| CP:NI        | 2         | Inpatient and Outpatient        | 1-10                                                   | <50                   | <50                | FABQ, PCCL       |
| CP:PE        | 1         | Outpatient                      | 2                                                      | ≥50                   | <50                | PCS              |
| CP:UC        | 1         | Outpatient                      | 4-8                                                    | <50                   | <50                | TSK              |
| CP+PC:PC     | 1         | Outpatient                      | 6                                                      | <50                   | <50                | TSK              |
| Csl:NI       | 1         | Outpatient (Online only)        | Unclear (self-directed website access and e-community) | ≥50                   | ≥50                | FABQ             |
| PC:PE        | 1         | Outpatient                      | 8                                                      | <50                   | <50                | TSK              |
| PC:PE+PC     | 6         | Outpatient                      | 4-11                                                   | <50                   | <50                | FABQ, PCS, TSK   |

<sup>a</sup> Categories for mode study setting were inpatient, outpatient, and outpatient (online only). Adv: advice, BT: behavioural therapy, CBT: cognitive behavioural therapy, CBT+PC: cognitive behavioural therapy delivered with physiotherapy care, CP: combined psychological approaches, CP+PC: combined psychological approaches delivered with physiotherapy care, Csl: counselling, CSQ: Coping Strategies Questionnaire, FABQ: Fear Avoidance Beliefs Questionnaire, GP: general practitioner care, Mind: mindfulness, n: number, NI: no intervention, PC: physiotherapy care, PCCL: Pain Coping and Cognition List, PCS: Pain Catastrophising Scale, PE: pain education, PE+PC: pain education delivered with physiotherapy care, TSK: Tampa Scale for Kinesiophobia, UC: usual care.

**Supplementary Table 9.4** Assessment of transitivity: network of interventions for improving intervention compliance

| Comparisons  | n studies | Mode study setting <sup>a</sup> | Intervention duration (weeks)                                                     | Mode mean age (years) | Mode sex (% males) |
|--------------|-----------|---------------------------------|-----------------------------------------------------------------------------------|-----------------------|--------------------|
| BT+PC:CP+PC  | 1         | Outpatient                      | 8                                                                                 | <50                   | <50                |
| CBT+PC:CP+PC | 2         | Outpatient                      | 6-12                                                                              | <50                   | <50                |
| CBT+PC:PC    | 5         | Outpatient                      | 4-12                                                                              | <50                   | <50                |
| CP:CP+PC     | 3         | Outpatient                      | 8-8                                                                               | ≥50                   | ≥50                |
| CP:GP        | 1         | Outpatient                      | 12                                                                                | ≥50                   | ≥50                |
| CP:PE        | 1         | Outpatient                      | 2                                                                                 | ≥50                   | <50                |
| CP:UC        | 1         | Outpatient                      | 12                                                                                | <50                   | ≥50                |
| CP+PC:PC     | 3         | Outpatient                      | 6-8                                                                               | <50                   | <50                |
| Csl+PC:PC    | 1         | Outpatient                      | 8                                                                                 | <50                   | <50                |
| GP:PE+PC     | 1         | Outpatient                      | 4                                                                                 | <50                   | <50                |
| PE:PC        | 1         | Outpatient                      | 8                                                                                 | <50                   | <50                |
| PE:UC        | 1         | Outpatient (Online only)        | Unclear (moderated email discussion group, pain education resource and videotape) | <50                   | ≥50                |
| PE+PC:PC     | 6         | Outpatient                      | 4-8                                                                               | <50                   | <50                |

<sup>a</sup> Categories for mode study setting were inpatient, outpatient, and outpatient (online only). BT+PC: behavioural therapy delivered with physiotherapy care, CBT+PC: cognitive behavioural therapy delivered with physiotherapy care, CP: combined psychological approaches, CP+PC: combined psychological approaches delivered with physiotherapy care, Csl+PC: counselling delivered with physiotherapy care, GP: general practitioner care, PC: physiotherapy care, PE: pain education, PE+PC: pain education delivered with physiotherapy care, UC: usual care.

## **Supplementary I. Results from direct and network evidence for physical function and pain intensity**

Interpretation of network results:

In this review, we analysed change from baseline scores. Therefore, a positive change score corresponded with higher/worsening of pain (over time), whilst a negative score indicated a lower/improvement in pain (over time). Results in the league tables below are presented as standardised mean differences (SMD), with the corresponding 95% confidence interval (CI). To interpret our results, a negative SMD value indicates that results favoured the column-defining treatment node for the NMA results (lower left triangle) and the row-defining treatment nodes for the pairwise meta-analysis results (upper right triangle).



**Supplementary Table 10.1** Physical function at post intervention

|                                     |                                       |                        |                        |                        |                                     |                        |                        |                        |                        |                        |                        |                        |                        |                        |                       |                       |
|-------------------------------------|---------------------------------------|------------------------|------------------------|------------------------|-------------------------------------|------------------------|------------------------|------------------------|------------------------|------------------------|------------------------|------------------------|------------------------|------------------------|-----------------------|-----------------------|
| PC<br>(reference)                   | <b>1.14</b><br>( <b>0.65,1.63</b> )   | -0.03 (-<br>0.72,0.65) |                        |                        | <b>0.78</b><br>( <b>0.16,1.39</b> ) |                        | -0.17 (-<br>1.52,1.18) | 0.13 (-<br>1.24,1.49)  |                        |                        | 0.02 (-<br>0.81,1.21)  |                        |                        | -0.18 (-<br>1.52,1.17) | 0.26 (-<br>1.21,1.73) | 0.16 (-<br>1.17,1.48) |
| <b>1.01</b><br>( <b>0.58,1.44</b> ) | CBT+PC                                | -0.68 (-<br>2.03,0.66) |                        | -0.04 (-<br>1.42,1.34) | -0.39 (-<br>1.79,1.00)              |                        |                        | 0.12 (-<br>1.21,1.44)  |                        |                        |                        |                        |                        |                        |                       |                       |
| 0.21 (-<br>0.31,0.74)               | <b>-0.80</b><br>( <b>1.42,-0.18</b> ) | CP+PC                  | -0.03 (-<br>0.82,0.77) |                        |                                     |                        |                        |                        |                        | -0.14 (-<br>1.58,1.29) | -0.38 (-<br>1.71,0.94) |                        |                        |                        |                       |                       |
| 0.35 (-<br>0.31,1.01)               | -0.67 (-<br>1.39,0.06)                | 0.14 (-<br>0.48,0.75)  | CP                     | -0.74 (-<br>2.26,0.77) |                                     |                        | -0.21 (-<br>0.98,0.57) |                        |                        |                        | -0.36 (-<br>1.73,1.02) | -0.14 (-<br>1.54,1.25) |                        |                        |                       |                       |
| 0.23 (-<br>0.56,1.02)               | -0.78 (-<br>1.58,0.02)                | 0.02 (-<br>0.83,0.87)  | -0.12 (-<br>0.93,0.69) | No<br>intervention     |                                     |                        |                        | 0.21 (-<br>0.57,1.00)  |                        |                        |                        |                        |                        | -0.02 (-<br>1.46,1.41) |                       |                       |
| <b>0.62</b><br>( <b>0.08,1.17</b> ) | -0.39 (-<br>1.04,0.26)                | 0.41 (-<br>0.34,1.16)  | 0.27 (-<br>0.58,1.12)  | 0.39 (-<br>0.55,1.34)  | PE+PC                               |                        |                        |                        |                        |                        |                        |                        |                        |                        |                       | 1.06 (-<br>0.28,2.40) |
| 0.38 (-<br>0.70,1.45)               | -0.64 (-<br>1.75,0.47)                | 0.16 (-<br>0.95,1.28)  | 0.03 (-<br>1.04,1.10)  | 0.15 (-<br>0.97,1.26)  | -0.24 (-<br>1.44,0.95)              | Mindfulness            | -0.37 (-<br>1.71,0.97) | -0.01 (-<br>1.35,1.33) | -0.30 (-<br>1.63,1.04) |                        |                        |                        |                        |                        |                       |                       |
| 0.06 (-<br>0.69,0.81)               | <b>-0.95</b><br>( <b>1.76,-0.14</b> ) | -0.15 (-<br>0.92,0.63) | -0.28 (-<br>0.92,0.35) | -0.17 (-<br>1.04,0.71) | -0.56 (-<br>1.48,0.36)              | -0.31 (-<br>1.34,0.72) | Usual care             | 0.36 (-<br>0.98,1.70)  |                        |                        |                        |                        | -0.20 (-<br>1.51,1.11) | -0.01 (-<br>1.36,1.35) |                       |                       |
| 0.39 (-<br>0.30,1.08)               | -0.62 (-<br>1.35,0.11)                | 0.18 (-<br>0.58,0.95)  | 0.05 (-<br>0.68,0.78)  | 0.16 (-<br>0.49,0.82)  | -0.23 (-<br>1.10,0.64)              | 0.02 (-<br>0.96,0.99)  | 0.33 (-<br>0.43,1.09)  | CBT                    | -0.04 (-<br>1.38,1.29) |                        |                        |                        | -0.06 (-<br>1.40,1.28) | -0.35 (-<br>1.34,0.64) |                       |                       |
| 0.03 (-<br>0.88,0.94)               | <b>-0.98</b><br>( <b>1.94,-0.03</b> ) | -0.18 (-<br>1.14,0.78) | -0.32 (-<br>1.26,0.63) | -0.20 (-<br>1.18,0.77) | -0.59 (-<br>1.64,0.46)              | -0.35 (-<br>1.32,0.63) | -0.03 (-<br>0.99,0.92) | -0.36 (-<br>1.18,0.46) | Advice                 |                        | 0.55 (-<br>0.86,1.96)  |                        |                        | 0.00 (-<br>1.56,1.56)  |                       |                       |
| 0.07 (-<br>1.46,1.60)               | -0.94 (-<br>2.50,0.62)                | -0.14 (-<br>1.58,1.29) | -0.28 (-<br>1.84,1.28) | -0.16 (-<br>1.83,1.51) | -0.55 (-<br>2.17,1.07)              | -0.31 (-<br>2.12,1.51) | 0.01 (-<br>1.62,1.64)  | -0.32 (-<br>1.95,1.30) | 0.04 (-<br>1.68,1.77)  | BT+PC                  |                        |                        |                        |                        |                       |                       |
| 0.15 (-<br>0.50,0.81)               | <b>-0.86</b><br>( <b>1.61,-0.11</b> ) | -0.06 (-<br>0.76,0.65) | -0.19 (-<br>0.95,0.56) | -0.08 (-<br>1.00,0.85) | -0.47 (-<br>1.31,0.38)              | -0.22 (-<br>1.35,0.91) | 0.09 (-<br>0.77,0.95)  | -0.24 (-<br>1.07,0.59) | 0.12 (-<br>0.80,1.05)  | 0.08 (-<br>1.51,1.68)  | PE                     |                        |                        |                        | 0.04 (-<br>1.31,1.39) |                       |
| 0.27 (-<br>0.84,1.38)               | -0.74 (-<br>1.88,0.40)                | 0.06 (-<br>1.06,1.18)  | -0.08 (-<br>1.10,0.95) | 0.04 (-<br>1.10,1.18)  | -0.35 (-<br>1.58,0.88)              | -0.11 (-<br>1.45,1.24) | 0.21 (-<br>0.91,1.33)  | -0.12 (-<br>1.13,0.89) | 0.24 (-<br>1.00,1.49)  | 0.20 (-<br>1.62,2.02)  | 0.12 (-<br>1.07,1.30)  | GP care                |                        |                        |                       |                       |
| -0.14 (-<br>1.65,1.37)              | -1.15 (-<br>2.69,0.39)                | -0.35 (-<br>1.87,1.17) | -0.49 (-<br>1.94,0.97) | -0.37 (-<br>1.94,1.21) | -0.76 (-<br>2.36,0.84)              | -0.51 (-<br>2.18,1.15) | -0.20 (-<br>1.51,1.11) | -0.53 (-<br>2.05,0.98) | -0.17 (-<br>1.79,1.46) | -0.21 (-<br>2.30,1.88) | -0.29 (-<br>1.86,1.28) | -0.41 (-<br>2.14,1.32) | Csl                    |                        |                       |                       |
| 0.03 (-<br>0.79,0.85)               | <b>-0.98</b><br>( <b>1.85,-0.11</b> ) | -0.18 (-<br>1.07,0.71) | -0.31 (-<br>1.18,0.55) | -0.20 (-<br>1.05,0.65) | -0.59 (-<br>1.56,0.39)              | -0.34 (-<br>1.45,0.76) | -0.03 (-<br>0.89,0.83) | -0.36 (-<br>1.08,0.36) | 0.00 (-<br>0.91,0.92)  | -0.04 (-<br>1.72,1.65) | -0.12 (-<br>1.06,0.82) | -0.24 (-<br>1.42,0.95) | 0.17 (-<br>1.40,1.74)  | BT                     |                       |                       |
| 0.22 (-<br>0.82,1.26)               | -0.79 (-<br>1.91,0.32)                | 0.01 (-<br>1.11,1.13)  | -0.13 (-<br>1.29,1.04) | -0.01 (-<br>1.27,1.26) | -0.40 (-<br>1.57,0.77)              | -0.15 (-<br>1.59,1.28) | 0.16 (-<br>1.07,1.39)  | -0.17 (-<br>1.37,1.03) | 0.19 (-<br>1.11,1.49)  | 0.15 (-<br>1.67,1.97)  | 0.07 (-<br>0.95,1.09)  | -0.05 (-<br>1.52,1.42) | 0.36 (-<br>1.44,2.16)  | 0.19 (-<br>1.09,1.47)  | Mind+PC               |                       |
| 0.91 (-<br>0.10,1.91)               | -0.10 (-<br>1.18,0.97)                | 0.70 (-<br>0.43,1.83)  | 0.56 (-<br>0.64,1.76)  | 0.68 (-<br>0.59,1.95)  | 0.29 (-<br>0.72,1.29)               | 0.53 (-<br>0.93,2.00)  | 0.84 (-<br>0.41,2.09)  | 0.51 (-<br>0.70,1.73)  | 0.88 (-<br>0.47,2.23)  | 0.84 (-<br>0.99,2.66)  | 0.75 (-<br>0.44,1.95)  | 0.64 (-<br>0.85,2.13)  | 1.05 (-<br>0.77,2.86)  | 0.87 (-<br>0.42,2.17)  | 0.69 (-<br>0.76,2.13) | Csl+PC                |

Results are presented as standardised mean differences (SMD) and 95% confidence intervals. BT: behavioural therapy, BT+PC: behavioural therapy delivered with physiotherapy care, CBT: cognitive behavioural therapy, CBT+PC: cognitive behavioural therapy delivered with physiotherapy care, CP: combined psychological approaches, CP+PC: combined psychological approaches delivered with physiotherapy care, Csl: counselling, Csl+PC: counselling delivered with physiotherapy care, GP care: general practitioner care, Mind+PC: mindfulness delivered with physiotherapy care, PC: physiotherapy care, PE: pain education, PE+PC: pain education delivered with physiotherapy care. Estimates in bold denote significance at  $p < 0.05$ . SMD values less than 0.00 favour the column-defining treatment node for the NMA results (lower left triangle) and the row-defining treatment nodes for the pairwise meta-analysis results (upper right triangle).

**Supplementary Table 10.2** Physical function at short-term treatment sustainability

|                                   |                                   |                        |                        |                                   |                        |                                   |                        |                        |                        |                        |                        |                        |
|-----------------------------------|-----------------------------------|------------------------|------------------------|-----------------------------------|------------------------|-----------------------------------|------------------------|------------------------|------------------------|------------------------|------------------------|------------------------|
| PC<br>(reference)                 | <b>0.83</b><br><b>(0.48,1.19)</b> |                        |                        | 0.14 (-<br>0.32,0.60)             | 0.21 (-<br>0.25,0.66)  | <b>1.01</b><br><b>(0.27,1.75)</b> |                        |                        |                        | -0.02 (-<br>0.78,0.75) |                        | -0.11 (-<br>0.88,0.65) |
| <b>0.63</b><br><b>(0.25,1.00)</b> | PE+PC                             |                        |                        | <b>0.73</b><br><b>(0.03,1.43)</b> |                        |                                   |                        |                        |                        |                        |                        |                        |
| 0.27 (-<br>0.53,1.08)             | -0.35 (-<br>1.22,0.51)            | CBT                    | 0.01 (-<br>0.75,0.77)  |                                   |                        |                                   |                        |                        |                        | -0.27 (-<br>0.99,0.45) |                        |                        |
| 0.28 (-<br>0.45,1.00)             | -0.35 (-<br>1.14,0.44)            | 0.00 (-<br>0.64,0.64)  | Advice                 | 0.33 (-<br>0.45,1.11)             |                        |                                   |                        |                        |                        |                        |                        |                        |
| <b>0.60</b><br><b>(0.20,1.00)</b> | -0.03 (-<br>0.52,0.46)            | 0.32 (-<br>0.46,1.11)  | 0.32 (-<br>0.34,0.98)  | CBT+PC                            | -0.46 (-<br>1.21,0.28) |                                   |                        |                        |                        |                        |                        |                        |
| 0.30 (-<br>0.05,0.65)             | -0.32 (-<br>0.82,0.18)            | 0.03 (-<br>0.79,0.85)  | 0.03 (-<br>0.72,0.77)  | -0.29 (-<br>0.75,0.16)            | CP+PC                  | -0.26 (-<br>0.96,0.43)            |                        |                        | -0.13 (-<br>0.89,0.63) |                        |                        |                        |
| 0.34 (-<br>0.16,0.85)             | -0.28 (-<br>0.91,0.34)            | 0.07 (-<br>0.81,0.95)  | 0.07 (-<br>0.76,0.90)  | -0.25 (-<br>0.85,0.35)            | 0.04 (-<br>0.45,0.53)  | PE                                |                        |                        | 0.16 (-<br>0.64,0.95)  |                        |                        |                        |
| 0.20 (-<br>0.52,0.91)             | -0.43 (-<br>1.24,0.38)            | -0.08 (-<br>1.15,1.00) | -0.08 (-<br>1.10,0.94) | -0.40 (-<br>1.22,0.42)            | -0.11 (-<br>0.90,0.69) | -0.15 (-<br>1.02,0.73)            | Mind+PC                |                        |                        |                        |                        |                        |
| 0.28 (-<br>0.21,0.77)             | -0.35 (-<br>0.96,0.26)            | 0.01 (-<br>0.78,0.79)  | 0.00 (-<br>0.77,0.77)  | -0.32 (-<br>0.89,0.26)            | -0.02 (-<br>0.50,0.46) | -0.07 (-<br>0.60,0.47)            | 0.08 (-<br>0.78,0.95)  | CP                     |                        | -0.26 (-<br>1.05,0.53) |                        | -0.12 (-<br>0.63,0.39) |
| 0.01 (-<br>0.75,0.77)             | -0.62 (-<br>1.45,0.22)            | -0.26 (-<br>0.88,0.36) | -0.26 (-<br>1.04,0.51) | -0.59 (-<br>1.36,0.19)            | -0.29 (-<br>1.05,0.47) | -0.33 (-<br>1.15,0.48)            | -0.19 (-<br>1.23,0.85) | -0.27 (-<br>0.93,0.40) | No<br>intervention     |                        | -0.18 (-<br>0.62,0.25) |                        |
| 0.07 (-<br>0.45,0.59)             | -0.56 (-<br>1.19,0.08)            | -0.20 (-<br>1.04,0.64) | -0.21 (-<br>1.02,0.61) | -0.53 (-<br>1.14,0.09)            | -0.23 (-<br>0.77,0.31) | -0.27 (-<br>0.88,0.33)            | -0.13 (-<br>1.01,0.76) | -0.21 (-<br>0.59,0.17) | 0.06 (-<br>0.69,0.81)  | Usual care             |                        | -0.10 (-<br>0.86,0.67) |
| 0.16 (-<br>0.55,0.87)             | -0.47 (-<br>1.26,0.33)            | -0.11 (-<br>1.05,0.82) | -0.12 (-<br>1.04,0.81) | -0.44 (-<br>1.21,0.33)            | -0.14 (-<br>0.84,0.56) | -0.18 (-<br>0.93,0.56)            | -0.04 (-<br>1.04,0.97) | -0.12 (-<br>0.63,0.39) | 0.15 (-<br>0.69,0.99)  | 0.09 (-<br>0.55,0.73)  | GP care                |                        |
| -0.07 (-<br>0.76,0.62)            | -0.70 (-<br>1.48,0.09)            | -0.34 (-<br>1.35,0.67) | -0.34 (-<br>1.31,0.62) | -0.67 (-<br>1.44,0.11)            | -0.37 (-<br>1.11,0.37) | -0.41 (-<br>1.22,0.39)            | -0.27 (-<br>1.26,0.72) | -0.35 (-<br>1.08,0.38) | -0.08 (-<br>1.03,0.87) | -0.14 (-<br>0.83,0.55) | -0.23 (-<br>1.12,0.66) | BT                     |

Results are presented as standardised mean differences (SMD) and 95% confidence intervals. BT: behavioural therapy, CBT: cognitive behavioural therapy, CBT+PC: cognitive behavioural therapy delivered with physiotherapy care, CP: combined psychological approaches, CP+PC: combined psychological approaches delivered with physiotherapy care, GP care: general practitioner care, Mind+PC: mindfulness delivered with physiotherapy care, PE: pain education, PE+PC: pain education delivered with physiotherapy care, PC: physiotherapy care. Estimates in bold denote significance at  $p < 0.05$ . SMD values less than 0.00 favour the column-defining treatment node for the NMA results (lower left triangle) and the row-defining treatment nodes for the pairwise meta-analysis results (upper right triangle).

**Supplementary Figure 1.** Forest plots of network results for physical function at short-term treatment sustainability

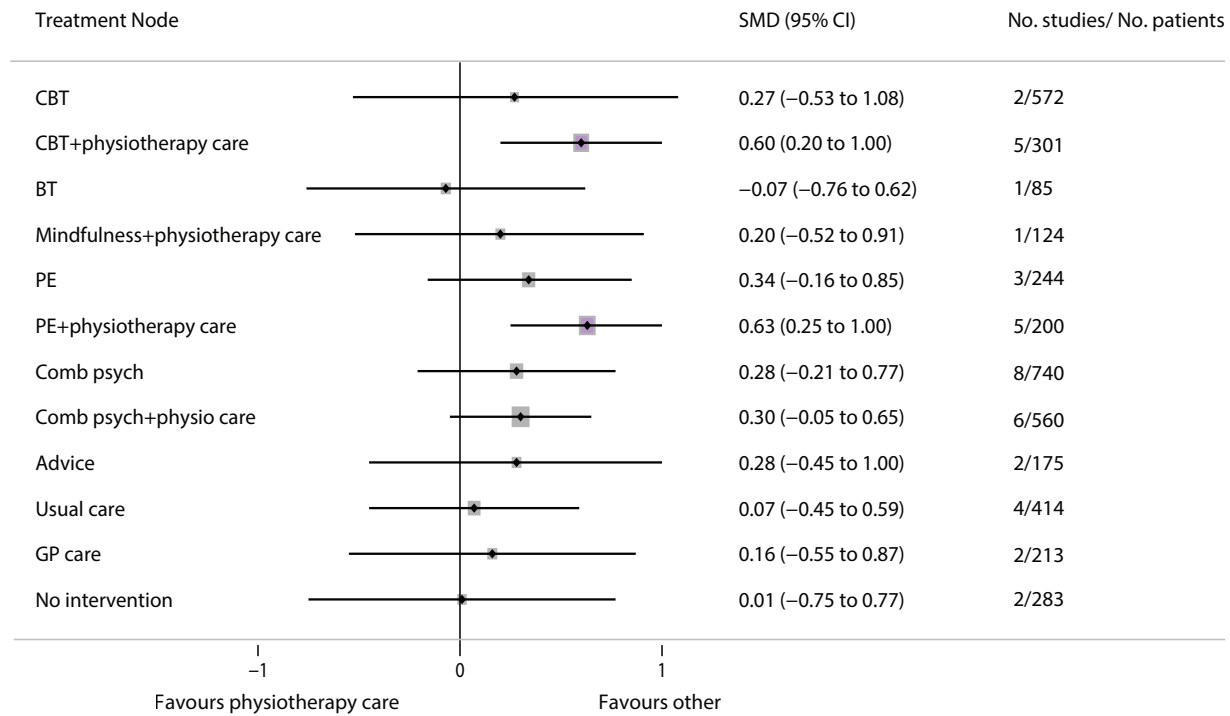

BT: behavioural therapy, CBT: cognitive behavioural therapy, Comb psych: combined psychological approaches, GP care: general practitioner care, PE: pain education. Physiotherapy care was considered the reference comparison group.

**Supplementary Table 10.3** Physical function at mid-term treatment sustainability

|                            |                                 |                        |                            |                        |                        |                                 |                            |                            |                                 |                            |                        |                        |                        |                       |
|----------------------------|---------------------------------|------------------------|----------------------------|------------------------|------------------------|---------------------------------|----------------------------|----------------------------|---------------------------------|----------------------------|------------------------|------------------------|------------------------|-----------------------|
| PC<br>(reference)          | <b>0.23</b><br>(0.03,0.43)      |                        |                            | 0.11 (-<br>0.45,0.66)  |                        | <b>0.45</b><br>(0.08,0.81)      | <b>0.91</b><br>(0.35,1.46) |                            |                                 |                            |                        |                        |                        |                       |
| <b>0.34</b><br>(0.13,0.56) | CBT+PC                          |                        |                            | 0.23 (-<br>0.25,0.71)  | -0.37 (-<br>0.90,0.16) | <b>-0.42 (-0.8,-<br/>0.05)</b>  |                            |                            |                                 |                            |                        |                        |                        |                       |
| 0.19 (-<br>0.25,0.62)      | -0.16 (-<br>0.58,0.27)          | Mindfulness            | -0.29 (-<br>0.78,0.19)     | 0.01 (-<br>0.48,0.50)  | -0.14 (-<br>0.61,0.34) |                                 |                            |                            |                                 |                            |                        |                        |                        |                       |
| -0.14 (-<br>0.53,0.25)     | <b>-0.48 (-<br/>0.87,-0.09)</b> | -0.32 (-<br>0.72,0.07) | Usual care                 | 0.30 (-<br>0.19,0.79)  |                        |                                 |                            | <b>0.31</b><br>(0.03,0.60) |                                 |                            |                        |                        |                        |                       |
| 0.17 (-<br>0.17,0.52)      | -0.17 (-<br>0.50,0.17)          | -0.01 (-<br>0.37,0.35) | 0.31 (-<br>0.02,0.65)      | CBT                    | 0.03 (-<br>0.45,0.52)  |                                 |                            |                            | -0.26 (-<br>0.74,0.23)          |                            |                        | -0.25 (-<br>0.67,0.17) | -0.37 (-<br>0.95,0.21) |                       |
| 0.08 (-<br>0.31,0.48)      | -0.26 (-<br>0.63,0.11)          | -0.10 (-<br>0.46,0.25) | 0.22 (-<br>0.19,0.63)      | -0.09 (-<br>0.42,0.24) | Advice                 |                                 |                            |                            |                                 |                            |                        |                        |                        |                       |
| <b>0.40</b><br>(0.15,0.66) | 0.06 (-<br>0.22,0.35)           | 0.22 (-<br>0.22,0.66)  | <b>0.54</b><br>(0.18,0.90) | 0.23 (-<br>0.12,0.58)  | 0.32 (-<br>0.09,0.73)  | CP+PC                           | -0.33 (-<br>0.70,0.03)     |                            | -0.29 (-<br>0.64, 0.07)         |                            |                        |                        |                        |                       |
| 0.36 (-<br>0.05,0.77)      | 0.02 (-<br>0.42,0.46)           | 0.18 (-<br>0.39,0.74)  | 0.50 (-<br>0.01,1.01)      | 0.19 (-<br>0.31,0.68)  | 0.28 (-<br>0.26,0.82)  | -0.04 (-<br>0.42,0.34)          | PE                         |                            |                                 |                            |                        |                        |                        | 0.31 (-<br>0.27,0.88) |
| -0.02 (-<br>0.41,0.38)     | -0.36 (-<br>0.81,0.09)          | -0.20 (-<br>0.79,0.39) | 0.12 (-<br>0.44,0.68)      | -0.19 (-<br>0.72,0.33) | -0.10 (-<br>0.66,0.46) | -0.42 (-<br>0.90,0.05)          | -0.38 (-<br>0.96,0.19)     | Mind+PC                    |                                 |                            |                        |                        |                        |                       |
| 0.17 (-<br>0.19,0.52)      | -0.18 (-<br>0.53,0.18)          | -0.02 (-<br>0.43,0.39) | <b>0.30</b><br>(0.05,0.55) | -0.01 (-<br>0.34,0.32) | 0.08 (-<br>0.32,0.49)  | -0.24 (-<br>0.54,0.06)          | -0.20 (-<br>0.67,0.28)     | 0.18 (-<br>0.35,0.71)      | CP                              | -0.34 (-<br>0.69,0.01)     |                        |                        |                        |                       |
| -0.14 (-<br>0.56,0.27)     | <b>-0.49 (-<br/>0.90,-0.07)</b> | -0.33 (-<br>0.78,0.12) | -0.01 (-<br>0.37,0.35)     | -0.32 (-<br>0.67,0.03) | -0.23 (-<br>0.67,0.22) | <b>-0.55 (-<br/>0.94,-0.16)</b> | -0.51 (-<br>1.04,0.02)     | -0.13 (-<br>0.70,0.45)     | <b>-0.31 (-<br/>0.60,-0.02)</b> | GP care                    |                        |                        |                        |                       |
| 0.14 (-<br>0.58,0.86)      | -0.20 (-<br>0.91,0.51)          | -0.05 (-<br>0.77,0.68) | 0.28 (-<br>0.43,0.99)      | -0.03 (-<br>0.66,0.59) | 0.06 (-<br>0.65,0.77)  | -0.26 (-<br>0.99,0.46)          | -0.22 (-<br>1.02,0.58)     | 0.16 (-<br>0.66,0.98)      | -0.03 (-<br>0.73,0.68)          | 0.28 (-<br>0.43,1.00)      | Csl                    | -0.22 (-<br>0.68,0.25) |                        |                       |
| -0.08 (-<br>0.62,0.47)     | -0.42 (-<br>0.95,0.12)          | -0.26 (-<br>0.81,0.29) | 0.06 (-<br>0.48,0.60)      | -0.25 (-<br>0.67,0.17) | -0.16 (-<br>0.69,0.38) | -0.48 (-<br>1.03,0.07)          | -0.44 (-<br>1.09,0.21)     | -0.06 (-<br>0.73,0.61)     | -0.24 (-<br>0.77,0.29)          | 0.07 (-<br>0.48,0.61)      | -0.22 (-<br>0.68,0.25) | No<br>intervention     |                        |                       |
| -0.19 (-<br>0.87,0.48)     | -0.54 (-<br>1.20,0.13)          | -0.38 (-<br>1.06,0.30) | -0.06 (-<br>0.72,0.61)     | -0.37 (-<br>0.95,0.21) | -0.28 (-<br>0.94,0.39) | -0.60 (-<br>1.28,0.08)          | -0.56 (-<br>1.32,0.21)     | -0.18 (-<br>0.96,0.61)     | -0.36 (-<br>1.02,0.30)          | -0.05 (-<br>0.73,0.62)     | -0.33 (-<br>1.19,0.52) | -0.12 (-<br>0.83,0.60) | BT                     |                       |
| 0.67 (-<br>0.03,1.37)      | 0.33 (-<br>0.39,1.05)           | 0.48 (-<br>0.32,1.29)  | <b>0.81</b><br>(0.04,1.58) | 0.50 (-<br>0.26,1.25)  | 0.59 (-<br>0.20,1.37)  | 0.26 (-<br>0.42,0.95)           | 0.31 (-<br>0.27,0.88)      | 0.69 (-<br>0.12,1.50)      | 0.50 (-<br>0.24,1.25)           | <b>0.81</b><br>(0.03,1.59) | 0.53 (-<br>0.45,1.51)  | 0.75 (-<br>0.12,1.61)  | 0.86 (-<br>0.09,1.82)  | PE+PC                 |

Results are presented as standardised mean differences (SMD) and 95% confidence intervals. BT: behavioural therapy, CBT: cognitive behavioural therapy, CBT+PC: cognitive behavioural therapy delivered with physiotherapy care, CP: combined psychological approach, CP+PC: combined psychological approaches delivered with physiotherapy care, Csl: counselling, GP care: general practitioner care, Mind+PC: mindfulness delivered with physiotherapy care, PC: physiotherapy care, PE: pain education, PE+PC: pain education delivered with physiotherapy care. Estimates in bold denote significance at  $p < 0.05$ . SMD values less than 0.00 favour the column-defining treatment node for the NMA results (lower left triangle) and the row-defining treatment nodes for the pairwise meta-analysis results (upper right triangle).

**Supplementary Figure 2.** Forest plots of network results for physical function at mid-term treatment sustainability

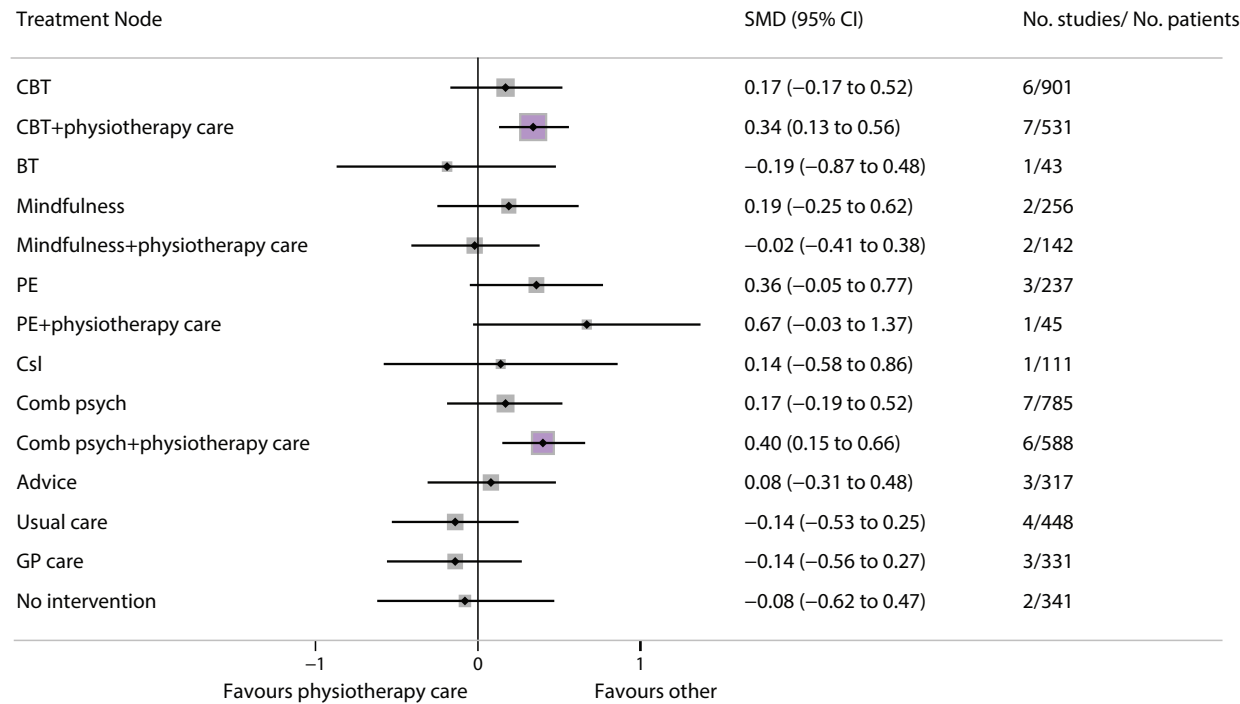

BT: behavioural therapy, CBT: cognitive behavioural therapy, Comb psych: combined psychological approaches, Csl: counselling, GP care: general practitioner care, PE: pain education. Physiotherapy care was considered the reference comparison group.

**Supplementary Table 10.4** Physical function at long-term treatment sustainability

|                        |                        |                        |                        |                        |                        |                        |                        |                        |                       |
|------------------------|------------------------|------------------------|------------------------|------------------------|------------------------|------------------------|------------------------|------------------------|-----------------------|
| PC<br>(reference)      |                        | 1.56 (-<br>0.10,3.21)  | 0.09 (-<br>3.52,3.71)  |                        |                        |                        |                        |                        |                       |
| -0.30 (-<br>3.98,3.38) | CP+PC                  |                        |                        |                        |                        |                        |                        |                        |                       |
| 1.56 (-<br>0.10,3.21)  | 1.86 (-<br>2.18,5.89)  | CBT+PC                 | 0.33 (-<br>3.28,3.94)  |                        |                        |                        |                        |                        |                       |
| 0.99 (-<br>2.31,4.29)  | 1.29 (-<br>3.65,6.24)  | -0.57 (-<br>3.87,2.74) | CBT                    | -0.20 (-<br>3.88,3.48) |                        |                        |                        |                        |                       |
| 0.79 (-<br>4.15,5.73)  | 1.09 (-<br>5.07,7.25)  | -0.77 (-<br>5.71,4.18) | -0.20 (-<br>3.88,3.48) | GP care                |                        |                        |                        |                        | 0.65 (-<br>3.03,4.34) |
| 1.63 (-<br>6.44,9.71)  | 1.94 (-<br>6.93,10.81) | 0.08 (-<br>7.99,8.15)  | 0.64 (-<br>6.72,8.01)  | 0.85 (-<br>5.54,7.23)  | Csl                    | -0.19 (-<br>3.87,3.49) |                        |                        |                       |
| 1.44 (-<br>5.74,8.63)  | 1.75 (-<br>6.33,9.82)  | -0.11 (-<br>7.30,7.07) | 0.45 (-<br>5.93,6.84)  | 0.65 (-<br>4.56,5.87)  | -0.19 (-<br>3.87,3.49) | No<br>intervention     |                        |                        | 0.00 (-<br>3.69,3.69) |
| 1.40 (-<br>6.66,9.47)  | 1.71 (-<br>7.16,10.57) | -0.15 (-<br>8.21,7.91) | 0.41 (-<br>6.94,7.77)  | 0.62 (-<br>5.76,6.99)  | -0.23 (-<br>7.59,7.13) | -0.04 (-<br>6.42,6.34) | PE                     | -0.26 (-<br>3.94,3.41) |                       |
| 1.14 (-<br>6.03,8.32)  | 1.45 (-<br>6.62,9.51)  | -0.41 (-<br>7.59,6.77) | 0.15 (-<br>6.22,6.53)  | 0.35 (-<br>4.85,5.56)  | -0.49 (-<br>6.87,5.89) | -0.30 (-<br>5.51,4.92) | -0.26 (-<br>3.94,3.41) | Usual Care             | 0.30 (-<br>3.38,3.98) |
| 1.44 (-<br>4.72,7.61)  | 1.75 (-<br>5.43,8.92)  | -0.11 (-<br>6.28,6.05) | 0.45 (-<br>4.75,5.66)  | 0.65 (-<br>3.03,4.34)  | -0.19 (-<br>5.41,5.02) | 0.00 (-<br>3.69,3.69)  | 0.04 (-<br>5.16,5.24)  | 0.30 (-<br>3.38,3.98)  | CP                    |

Results are presented as standardised mean differences (SMD) and 95% confidence intervals. CBT: cognitive behavioural therapy, CBT+PC: cognitive behavioural therapy delivered with physiotherapy care, CP: combined psychological approaches, CP+PC: combined psychological approaches delivered with physiotherapy care, Csl: counselling, GP care: general practitioner care, PC: physiotherapy care, PE: pain education. Estimates in bold denote significance at  $p < 0.05$ . SMD values less than 0.00 favour the column-defining treatment node for the NMA results (lower left triangle) and the row-defining treatment nodes for the pairwise meta-analysis results (upper right triangle).

**Supplementary Figure 3.** Forest plots of network results for physical function at long-term treatment sustainability

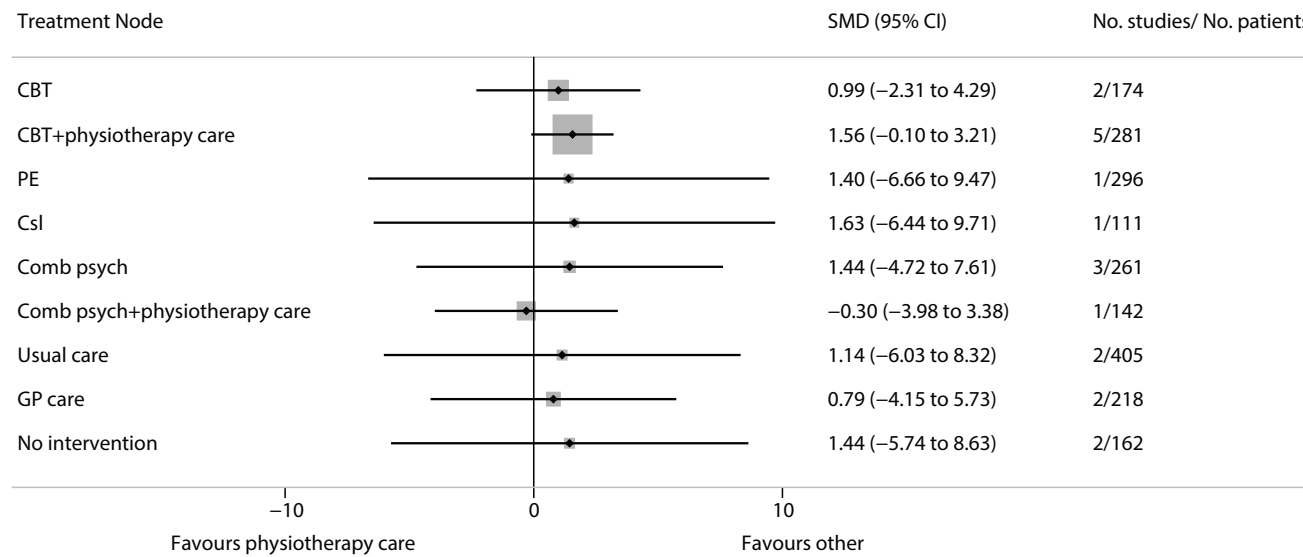

CBT: cognitive behavioural therapy, Comb psych: combined psychological approaches, Csl: counselling, GP care: general practitioner care, PE: pain education. Physiotherapy care was considered the reference comparison group.

**Supplementary Table 10.5 Pain intensity at post intervention**

|                          |                     |                             |                             |                             |                          |                          |                     |                          |                     |                          |                     |                             |                             |                             |                    |                             |                    |
|--------------------------|---------------------|-----------------------------|-----------------------------|-----------------------------|--------------------------|--------------------------|---------------------|--------------------------|---------------------|--------------------------|---------------------|-----------------------------|-----------------------------|-----------------------------|--------------------|-----------------------------|--------------------|
| PC (reference)           |                     | 0.64 (-0.31, 1.60)          | 0.42 (-0.53, 1.38)          | -0.45 (-1.37, 0.47)         |                          |                          | 0.42 (-0.74, 1.59)  | 0.28 (-0.52, 1.08)       |                     | -0.65 (-2.22, 0.91)      |                     | 0.22 (-1.37, 1.81)          | <b>0.92 (0.34, 1.50)</b>    | <b>-1.90 (-3.09, -0.72)</b> |                    | <b>-1.12 (-1.69, -0.55)</b> |                    |
| 0.14 (-1.45, 1.72)       | Csl+PC              |                             |                             |                             |                          |                          |                     |                          |                     |                          |                     |                             |                             |                             |                    |                             |                    |
| <b>1.08 (0.22, 1.94)</b> | 0.94 (-0.86, 2.75)  | BT+PC                       |                             | -1.08 (-2.27, 0.1)          |                          |                          |                     |                          |                     |                          |                     |                             |                             | <b>-2.41 (-3.65, -1.17)</b> |                    | -0.08 (-1.75, 1.58)         |                    |
| 0.42 (-0.41, 1.26)       | 0.29 (-1.50, 2.08)  | -0.66 (-1.85, 0.54)         | Mind+PC                     |                             |                          |                          | -0.21 (-1.79, 1.37) |                          |                     |                          |                     |                             |                             |                             |                    |                             |                    |
| 0.04 (-0.65, 0.73)       | -0.10 (-1.82, 1.63) | <b>-1.04 (-1.97, -0.11)</b> | -0.38 (-1.46, 0.69)         | BT                          |                          |                          |                     |                          | -0.19 (-1.96, 1.57) | -0.41 (-1.98, 1.17)      |                     | 0.20 (-0.54, 0.94)          |                             | <b>-0.84 (-1.53, -0.15)</b> |                    |                             |                    |
| -1.69 (-3.45, 0.07)      | -1.83 (-4.19, 0.54) | <b>-2.77 (-4.68, -0.86)</b> | <b>-2.11 (-4.05, -0.18)</b> | -1.73 (-3.51, 0.05)         | Csl                      |                          |                     |                          |                     | <b>1.55 (0.00, 3.1)</b>  |                     |                             |                             |                             |                    |                             |                    |
| -0.42 (-1.54, 0.70)      | -0.56 (-2.49, 1.38) | <b>-1.50 (-2.82, -0.18)</b> | -0.84 (-2.22, 0.54)         | -0.46 (-1.56, 0.64)         | 1.27 (-0.68, 3.22)       | GP care                  |                     |                          |                     |                          |                     | 0.78 (-0.39, 1.96)          |                             |                             |                    | 0.30 (-1.31, 1.92)          |                    |
| 0.21 (-0.64, 1.07)       | 0.08 (-1.72, 1.87)  | -0.87 (-2.06, 0.33)         | -0.21 (-1.23, 0.81)         | 0.17 (-0.88, 1.23)          | 1.90 (-0.00, 3.81)       | 0.63 (-0.71, 1.98)       | PE                  |                          |                     |                          |                     |                             |                             |                             |                    | 0.31 (-1.29, 1.90)          |                    |
| 0.13 (-0.50, 0.76)       | -0.00 (-1.71, 1.70) | -0.95 (-1.98, 0.08)         | -0.29 (-1.33, 0.74)         | 0.09 (-0.77, 0.95)          | <b>1.82 (0.03, 3.62)</b> | 0.55 (-0.63, 1.73)       | -0.08 (-1.09, 0.92) | CP+PC                    |                     |                          |                     |                             |                             |                             |                    | 0.14 (-0.78, 1.07)          | 0.93 (-0.64, 2.50) |
| 0.01 (-1.15, 1.16)       | -0.13 (-2.09, 1.83) | -1.07 (-2.40, 0.25)         | -0.42 (-1.83, 1.00)         | -0.03 (-1.08, 1.01)         | 1.70 (-0.28, 3.67)       | 0.42 (-1.61, 1.81)       | -0.21 (-1.61, 1.19) | -0.13 (-1.38, 1.13)      | Advice              |                          | 0.14 (-1.42, 1.71)  | 0.10 (-1.47, 1.68)          |                             |                             |                    |                             |                    |
| -0.14 (-0.98, 0.70)      | -0.28 (-2.07, 1.51) | <b>-1.22 (-2.34, -0.10)</b> | -0.57 (-1.73, 0.60)         | -0.18 (-1.05, 0.69)         | 1.55 (-0.00, 3.10)       | 0.28 (-0.91, 1.46)       | -0.36 (-1.47, 0.76) | -0.27 (-1.18, 0.63)      | -0.15 (-1.38, 1.08) | Usual care               | 0.44 (-1.13, 2.01)  | 0.34 (-1.23, 1.91)          |                             |                             |                    | 0.08 (-0.82, 0.98)          |                    |
| 0.15 (-0.94, 1.24)       | 0.01 (-1.91, 1.94)  | -0.93 (-2.21, 0.35)         | -0.27 (-1.64, 1.09)         | 0.11 (-0.92, 1.14)          | 1.84 (-0.06, 3.74)       | 0.57 (-0.78, 1.91)       | -0.06 (-1.40, 1.28) | 0.02 (-1.17, 1.20)       | 0.14 (-0.97, 1.26)  | 0.29 (-0.81, 1.40)       | Mindfulness         | -0.10 (-1.67, 1.47)         |                             | -0.52 (-2.21, 1.17)         |                    |                             |                    |
| 0.23 (-0.47, 0.94)       | 0.10 (-1.64, 1.83)  | -0.85 (-1.82, 0.13)         | -0.19 (-1.27, 0.89)         | 0.19 (-0.40, 0.78)          | <b>1.92 (0.16, 3.69)</b> | 0.65 (-0.33, 1.63)       | 0.02 (-1.04, 1.08)  | 0.10 (-0.76, 0.96)       | 0.23 (-0.79, 1.25)  | 0.38 (-0.48, 1.23)       | 0.08 (-0.90, 1.06)  | CBT                         |                             | <b>-0.76 (-1.5, -0.02)</b>  |                    | -0.21 (-1.77, 1.35)         |                    |
| <b>0.91 (0.37, 1.45)</b> | 0.78 (-0.90, 2.45)  | -0.17 (-1.18, 0.84)         | 0.49 (-0.51, 1.48)          | <b>0.87 (0.00, 1.74)</b>    | <b>2.60 (0.76, 4.44)</b> | <b>1.33 (0.10, 2.57)</b> | 0.70 (-0.31, 1.71)  | 0.78 (-0.04, 1.60)       | 0.91 (-0.36, 2.18)  | <b>1.06 (0.06, 2.05)</b> | 0.76 (-0.45, 1.97)  | 0.68 (-0.20, 1.56)          | PE+PC                       |                             |                    | 0.06 (-1.56, 1.67)          |                    |
| -0.62 (-1.31, 0.07)      | -0.75 (-2.48, 0.97) | <b>-1.70 (-2.63, -0.76)</b> | -1.04 (-2.12, 0.03)         | <b>-0.66 (-1.26, -0.06)</b> | 1.07 (-0.71, 2.85)       | -0.20 (-1.29, 0.89)      | -0.83 (-1.88, 0.22) | -0.75 (-1.60, 0.10)      | -0.62 (-1.71, 0.46) | -0.48 (-1.35, 0.40)      | -0.77 (-1.76, 0.23) | <b>-0.85 (-1.44, -0.26)</b> | <b>-1.53 (-2.40, -0.66)</b> | No intervention             | 0.71 (-1.02, 2.44) | 0.11 (-1.45, 1.68)          |                    |
| 0.12 (-0.61, 0.86)       | -0.01 (-1.76, 1.73) | -0.95 (-2.02, 0.11)         | -0.30 (-1.38, 0.78)         | 0.08 (-0.75, 0.92)          | <b>1.81 (0.10, 3.53)</b> | 0.54 (-0.54, 1.62)       | -0.09 (-1.07, 0.90) | -0.01 (-0.73, 0.72)      | 0.12 (-1.10, 1.34)  | 0.27 (-0.47, 1.00)       | -0.02 (-1.16, 1.11) | -0.11 (-0.92, 0.71)         | -0.79 (-1.69, 0.12)         | 0.74 (-0.07, 1.56)          | CP                 |                             |                    |
| <b>0.92 (0.43, 1.42)</b> | 0.79 (-0.87, 2.45)  | -0.16 (-1.07, 0.76)         | 0.50 (-0.47, 1.47)          | <b>0.88 (0.11, 1.66)</b>    | <b>2.61 (0.81, 4.42)</b> | <b>1.34 (0.18, 2.51)</b> | 0.71 (-0.26, 1.68)  | <b>0.79 (0.06, 1.53)</b> | 0.92 (-0.28, 2.12)  | <b>1.07 (0.15, 1.99)</b> | 0.77 (-0.36, 1.91)  | 0.69 (-0.08, 1.46)          | 0.01 (-0.68, 0.70)          | 1.54 (0.79, 2.30)           | 0.80 (-0.03, 1.63) | CBT+PC                      |                    |

Results are presented as standardised mean differences (SMD) and 95% confidence intervals. BT: behavioural therapy, BT+PC: behavioural therapy delivered with physiotherapy care, CBT: cognitive behavioural therapy, CBT+PC: cognitive behavioural therapy delivered with physiotherapy care, CP: combined psychological approaches, CP+PC: combined psychological approaches delivered with physiotherapy care, Csl: counselling, Csl+PC: counselling delivered with physiotherapy care, GP care: general practitioner care, Mind+PC: Mindfulness delivered with physiotherapy care, NI: no intervention, PC: physiotherapy care, PE: pain education, PE+PC: pain education delivered with physiotherapy care. Estimates in bold denote significance at  $p < 0.05$ . SMD values less than 0.00 favour the column-defining treatment node for the NMA results (lower left triangle) and the row-defining treatment nodes for the pairwise meta-analysis results (upper right triangle).



**Supplementary Table 10.6** Pain intensity at short-term treatment sustainability

|                                 |                                 |                                 |                                 |                                 |                                 |                                 |                                 |                                 |                                 |                            |                            |                              |                              |
|---------------------------------|---------------------------------|---------------------------------|---------------------------------|---------------------------------|---------------------------------|---------------------------------|---------------------------------|---------------------------------|---------------------------------|----------------------------|----------------------------|------------------------------|------------------------------|
| PC<br>(reference)               | <b>1.22</b><br>(0.32,2.12)      |                                 |                                 | 0.10 (-1.95,<br>2.14)           | 0.16 (-1.02,<br>1.34)           | 1.30 (-0.66,<br>3.27)           |                                 |                                 | <b>-5.15 (-6.87,<br/>-3.43)</b> | -0.24 (-2.29,<br>1.80)     |                            | -0.36 (-1.79,<br>1.07)       | 1.08 (-0.78,<br>2.95)        |
| <b>1.04</b><br>(0.19,1.88)      | PE+PC                           |                                 |                                 | 0.32 (-1.69,<br>2.32)           |                                 |                                 |                                 |                                 |                                 |                            |                            |                              |                              |
| -0.22 (-<br>1.58,1.15)          | -1.26 (-<br>2.83,0.32)          | CBT                             | -0.20 (-2.24,<br>1.84)          |                                 |                                 |                                 |                                 |                                 | -0.30 (-2.12,<br>1.52)          |                            |                            | -1.97 (-4.05,<br>0.12)       | 0.00 (-1.47,<br>1.48)        |
| -0.35 (-<br>1.80,1.10)          | -1.39 (-<br>3.01,0.23)          | -0.13 (-<br>1.55,1.28)          | Advice                          | 0.37 (-1.66,<br>2.40)           |                                 |                                 |                                 | 0.09 (-1.93,<br>2.11)           |                                 |                            |                            |                              |                              |
| 0.47 (-<br>0.66,1.61)           | -0.56 (-<br>1.82,0.69)          | 0.69 (-<br>0.89,2.28)           | 0.83 (-<br>0.64,2.29)           | CBT+PC                          | -0.48 (-2.52,<br>1.56)          |                                 |                                 |                                 |                                 |                            |                            |                              |                              |
| -0.04 (-<br>1.00,0.92)          | -1.07 (-<br>2.31,0.16)          | 0.18 (-<br>1.35,1.72)           | 0.32 (-<br>1.25,1.88)           | -0.51 (-<br>1.76,0.74)          | CP+PC                           |                                 |                                 | 0.00 (-<br>2.02,2.02)           |                                 |                            |                            |                              |                              |
| 0.30 (-<br>1.24,1.83)           | -0.74 (-<br>2.48,1.00)          | 0.52 (-<br>1.34,2.37)           | 0.65 (-<br>1.26,2.56)           | -0.18 (-<br>2.01,1.65)          | 0.33 (-<br>1.38,2.05)           | PE                              |                                 | 0.04 (-1.90,<br>1.98)           |                                 |                            |                            |                              |                              |
| 0.42 (-<br>1.00,1.83)           | -0.62 (-<br>2.27,1.03)          | 0.64 (-<br>1.33,2.60)           | 0.77 (-<br>1.26,2.80)           | -0.06 (-<br>1.87,1.76)          | 0.45 (-<br>1.26,2.17)           | 0.12 (-<br>1.97,2.21)           | Mind+PC                         |                                 |                                 |                            |                            |                              |                              |
| -0.64 (-<br>1.79,0.50)          | <b>-1.68 (-<br/>3.07,-0.29)</b> | -0.42 (-<br>1.70,0.86)          | -0.29 (-<br>1.64,1.06)          | -1.12 (-<br>2.54,0.30)          | -0.61 (-<br>1.87,0.65)          | -0.94 (-<br>2.47,0.59)          | -1.06 (-<br>2.88,0.76)          | CP                              | 0.00 (-<br>1.89,1.89)           | 0.02 (-1.15,<br>1.19)      | 0.16 (-1.19,<br>1.51)      |                              |                              |
| <b>-2.06 (-<br/>3.51,-0.60)</b> | <b>-3.10 (-<br/>4.76,-1.44)</b> | <b>-1.84 (-<br/>3.19,-0.48)</b> | <b>-1.71 (-<br/>3.38,-0.03)</b> | <b>-2.53 (-<br/>4.24,-0.82)</b> | <b>-2.02 (-<br/>3.64,-0.41)</b> | <b>-2.36 (-<br/>4.27,-0.44)</b> | <b>-2.48 (-<br/>4.51,-0.44)</b> | <b>-1.42 (-<br/>2.76,-0.07)</b> | No<br>intervention              |                            |                            | <b>4.44 (2.50,<br/>6.37)</b> | <b>6.54 (4.79,<br/>8.28)</b> |
| -0.47 (-<br>1.77,0.83)          | -1.51 (-<br>3.03,0.02)          | -0.25 (-<br>1.72,1.22)          | -0.12 (-<br>1.70,1.47)          | -0.94 (-<br>2.53,0.64)          | -0.43 (-<br>1.89,1.02)          | -0.77 (-<br>2.51,0.98)          | -0.89 (-<br>2.81,1.04)          | 0.17 (-<br>0.83,1.18)           | <b>1.59</b><br>(0.03,3.15)      | Usual care                 |                            |                              | 0.05 (-1.97,<br>2.08)        |
| -0.99 (-<br>2.58,0.60)          | <b>-2.03 (-<br/>3.80,-0.25)</b> | -0.77 (-<br>2.25,0.71)          | -0.64 (-<br>2.34,1.07)          | -1.46 (-<br>3.25,0.33)          | -0.95 (-<br>2.64,0.74)          | -1.28 (-<br>3.21,0.64)          | -1.40 (-<br>3.53,0.72)          | -0.34 (-<br>1.58,0.89)          | 1.07 (-<br>0.62,2.76)           | -0.52 (-<br>2.07,1.03)     | GP care                    |                              |                              |
| 0.04 (-<br>1.19,1.28)           | -1.00 (-<br>2.47,0.48)          | 0.26 (-<br>0.89,1.41)           | 0.39 (-<br>1.16,1.95)           | -0.43 (-<br>1.98,1.12)          | 0.08 (-<br>1.38,1.54)           | -0.25 (-<br>2.07,1.56)          | -0.37 (-<br>2.25,1.50)          | 0.69 (-<br>0.61,1.98)           | <b>2.10</b><br>(0.67,3.53)      | 0.51 (-<br>0.89,1.91)      | 1.03 (-<br>0.59,2.65)      | BT                           | 1.61 (-0.48,<br>3.70)        |
| <b>2.15</b><br>(0.27,4.03)      | 1.11 (-<br>0.94,3.16)           | <b>2.37</b><br>(0.33,4.41)      | <b>2.50</b><br>(0.29,4.72)      | 1.68 (-<br>0.46,3.81)           | <b>2.19</b><br>(0.12,4.25)      | 1.85 (-<br>0.49,4.20)           | 1.73 (-<br>0.62,4.09)           | <b>2.79</b><br>(0.77,4.82)      | <b>4.21</b><br>(2.16,6.26)      | <b>2.62</b><br>(0.50,4.73) | <b>3.14</b><br>(0.86,5.41) | <b>2.11</b><br>(0.22,3.99)   | BT+PC                        |

Results are presented as standardised mean differences (SMD) and 95% confidence intervals. BT: behavioural therapy, BT+PC: behavioural therapy delivered with physiotherapy care, CBT: cognitive behavioural therapy, CBT+PC: cognitive behavioural therapy delivered with physiotherapy care, CP: combined psychological approaches, CP+PC: combined psychological approaches delivered with physiotherapy care, GP care: general practitioner care, Mind+PC: mindfulness delivered with physiotherapy care, PC: physiotherapy care, PE: pain education, PE+PC: pain education delivered with physiotherapy care. Estimates in bold denote significance at  $p < 0.05$ . SMD values less than 0.00 favour the column-defining treatment node for the NMA results (lower left triangle) and the row-defining treatment nodes for the pairwise meta-analysis results (upper right triangle).

**Supplementary Figure 4.** Forest plots of network results for pain intensity at short-term treatment sustainability

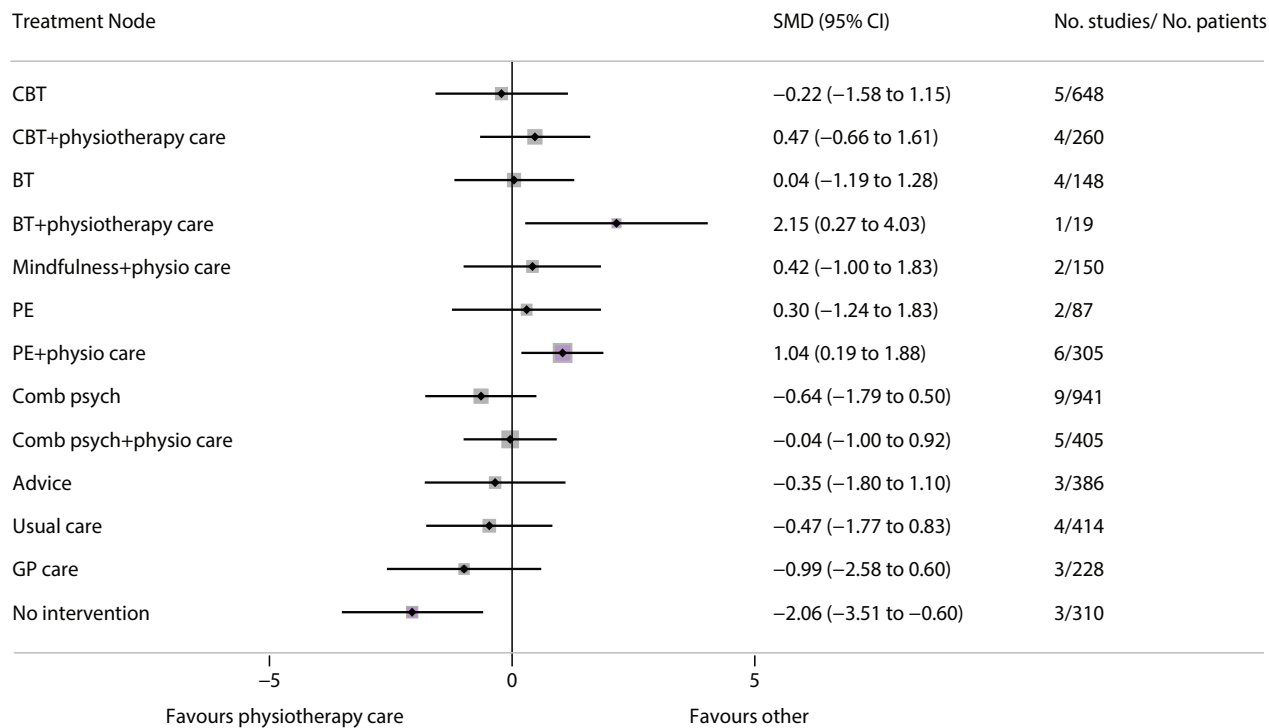

BT: behavioural therapy, CBT: cognitive behavioural therapy, Comb psych: combined psychological approaches, GP care: general practitioner care, PE: pain education. Physiotherapy care was considered the reference comparison group.

**Supplementary Table 10.7** Pain intensity at mid-term treatment sustainability

|                                   |                                   |                                   |                                   |                                   |                                   |                                   |                                      |                                   |                                   |                        |                                   |                                   |                                   |                                   |       |
|-----------------------------------|-----------------------------------|-----------------------------------|-----------------------------------|-----------------------------------|-----------------------------------|-----------------------------------|--------------------------------------|-----------------------------------|-----------------------------------|------------------------|-----------------------------------|-----------------------------------|-----------------------------------|-----------------------------------|-------|
| PC<br>(reference)                 | 0.21 (-<br>0.12,0.53)             |                                   |                                   | 0.05 (-<br>0.64,0.74)             |                                   | 0.35 (-<br>0.10,0.79)             | <b>1.27</b><br><b>(0.58,1.97)</b>    |                                   |                                   |                        |                                   | 0.02 (-<br>0.79,0.82)             | 0.05 (-<br>0.51,0.61)             | <b>1.01</b><br><b>(0.32,1.70)</b> |       |
| 0.28 (-<br>0.01,0.57)             | CBT+PC                            |                                   |                                   | 0.25 (-<br>0.42,0.91)             | -0.48 (-<br>1.16,0.20)            | -0.43 (-<br>1.05,0.19)            |                                      |                                   |                                   |                        |                                   |                                   |                                   | 0.73 (-<br>0.25,1.71)             |       |
| 0.21 (-<br>0.36,0.78)             | -0.07 (-<br>0.63,0.49)            | Mindfulness                       | -0.27 (-<br>0.92,0.38)            | 0.03 (-<br>0.62,0.68)             | -0.35 (-<br>0.99,0.29)            |                                   |                                      |                                   |                                   |                        |                                   |                                   |                                   |                                   |       |
| -0.09 (-<br>0.63,0.44)            | -0.37 (-<br>0.91,0.16)            | -0.30 (-<br>0.83,0.23)            | Usual care                        | 0.30 (-<br>0.35,0.95)             |                                   |                                   |                                      |                                   |                                   |                        |                                   | 0.13 (-<br>0.24,0.51)             |                                   |                                   |       |
| 0.21 (-<br>0.20,0.62)             | -0.07 (-<br>0.48,0.34)            | -0.00 (-<br>0.48,0.47)            | 0.30 (-<br>0.15,0.75)             | CBT                               | -0.17 (-<br>0.82,0.47)            |                                   |                                      |                                   | -0.09 (-<br>0.73,0.55)            |                        |                                   | -0.25 (-<br>0.84,0.34)            | 0.13 (-<br>0.32,0.58)             |                                   |       |
| -0.10 (-<br>0.60,0.41)            | -0.38 (-<br>0.85,0.09)            | -0.31 (-<br>0.79,0.17)            | -0.01 (-<br>0.56,0.55)            | -0.31 (-<br>0.74,0.12)            | Advice                            |                                   |                                      |                                   |                                   |                        |                                   |                                   |                                   |                                   |       |
| 0.14 (-<br>0.22,0.50)             | -0.14 (-<br>0.53,0.25)            | -0.07 (-<br>0.67,0.53)            | 0.23 (-<br>0.30,0.77)             | -0.07 (-<br>0.54,0.40)            | 0.24 (-<br>0.31,0.79)             | CP+PC                             |                                      |                                   |                                   |                        |                                   | 0.00 (-<br>0.66,0.66)             |                                   |                                   |       |
| <b>0.75</b><br><b>(0.16,1.35)</b> | 0.47 (-<br>0.19,1.13)             | 0.54 (-<br>0.28,1.37)             | <b>0.85</b><br><b>(0.05,1.64)</b> | 0.54 (-<br>0.18,1.27)             | <b>0.85</b><br><b>(0.07,1.63)</b> | 0.61 (-<br>0.08,1.31)             | PE                                   |                                   |                                   |                        |                                   |                                   |                                   | 0.11 (-<br>0.53,0.75)             |       |
| -0.10 (-<br>0.61,0.40)            | -0.39 (-<br>0.97,0.20)            | -0.31 (-<br>1.08,0.45)            | -0.01 (-<br>0.75,0.72)            | -0.31 (-<br>0.97,0.34)            | -0.01 (-<br>0.72,0.71)            | -0.24 (-<br>0.87,0.38)            | <b>-0.86</b><br><b>(-1.64,-0.08)</b> | Mind+PC                           |                                   |                        |                                   |                                   |                                   |                                   |       |
| 0.24 (-<br>0.32,0.80)             | -0.04 (-<br>0.60,0.52)            | 0.03 (-<br>0.58,0.64)             | 0.33 (-<br>0.15,0.81)             | 0.03 (-<br>0.44,0.50)             | 0.34 (-<br>0.26,0.94)             | 0.10 (-<br>0.47,0.66)             | -0.51 (-<br>1.33,0.30)               | 0.34 (-<br>0.41,1.10)             | GP care                           |                        |                                   | -0.27 (-<br>0.73,0.19)            |                                   |                                   |       |
| 0.16 (-<br>0.79,1.11)             | -0.12 (-<br>1.07,0.83)            | -0.05 (-<br>1.03,0.93)            | 0.25 (-<br>0.72,1.22)             | -0.05 (-<br>0.91,0.81)            | 0.26 (-<br>0.70,1.22)             | 0.02 (-<br>0.96,1.00)             | -0.59 (-<br>1.72,0.53)               | 0.26 (-<br>0.81,1.34)             | -0.08 (-<br>1.06,0.90)            | Csl                    |                                   | -0.20<br>(0.83,0.42)              |                                   |                                   |       |
| -0.04 (-<br>0.76,0.68)            | -0.33 (-<br>1.04,0.39)            | -0.26 (-<br>1.01,0.50)            | 0.05 (-<br>0.69,0.79)             | -0.25 (-<br>0.84,0.34)            | 0.05 (-<br>0.68,0.78)             | -0.19 (-<br>0.94,0.57)            | -0.80 (-<br>1.73,0.13)               | 0.06 (-<br>0.82,0.94)             | -0.29 (-<br>1.04,0.47)            | -0.20 (-<br>0.83,0.42) | No<br>intervention                |                                   |                                   |                                   |       |
| 0.04 (-<br>0.47,0.54)             | -0.25 (-<br>0.76,0.27)            | -0.18 (-<br>0.73,0.38)            | 0.13 (-<br>0.21,0.46)             | -0.17 (-<br>0.62,0.27)            | 0.13 (-<br>0.43,0.69)             | -0.11 (-<br>0.59,0.38)            | -0.72 (-<br>1.50,0.06)               | 0.14 (-<br>0.58,0.86)             | -0.21 (-<br>0.60,0.19)            | -0.12 (-<br>1.09,0.84) | 0.08 (-<br>0.66,0.82)             | CP                                |                                   |                                   |       |
| 0.29 (-<br>0.21,0.78)             | 0.00 (-<br>0.50,0.51)             | 0.08 (-<br>0.53,0.68)             | 0.38 (-<br>0.20,0.96)             | 0.08 (-<br>0.32,0.47)             | 0.38 (-<br>0.18,0.95)             | 0.14 (-<br>0.41,0.70)             | -0.47 (-<br>1.24,0.30)               | 0.39 (-<br>0.32,1.10)             | 0.05 (-<br>0.55,0.64)             | 0.13 (-<br>0.82,1.07)  | 0.33 (-<br>0.38,1.04)             | 0.25 (-<br>0.32,0.82)             | BT                                | 0.71 (-<br>0.11,1.53)             |       |
| 0.41 (-<br>0.13,0.95)             | 0.13 (-<br>0.49,0.74)             | 0.20 (-<br>0.59,0.99)             | 0.50 (-<br>0.26,1.26)             | 0.20 (-<br>0.48,0.88)             | 0.51 (-<br>0.23,1.25)             | 0.27 (-<br>0.38,0.92)             | -0.34 (-<br>0.92,0.23)               | 0.51 (-<br>0.23,1.26)             | 0.17 (-<br>0.61,0.95)             | 0.25 (-<br>0.84,1.35)  | 0.45 (-<br>0.44,1.35)             | 0.38 (-<br>0.37,1.12)             | 0.12 (-<br>0.61,0.86)             | PE+PC                             |       |
| <b>1.01</b><br><b>(0.41,1.60)</b> | <b>0.72</b><br><b>(0.11,1.33)</b> | <b>0.80</b><br><b>(0.03,1.56)</b> | <b>1.10</b><br><b>(0.35,1.84)</b> | <b>0.80</b><br><b>(0.15,1.44)</b> | <b>1.10</b><br><b>(0.38,1.83)</b> | <b>0.87</b><br><b>(0.20,1.53)</b> | 0.25 (-<br>0.59,1.09)                | <b>1.11</b><br><b>(0.33,1.89)</b> | <b>0.77</b><br><b>(0.00,1.53)</b> | 0.85 (-<br>0.23,1.92)  | <b>1.05</b><br><b>(0.17,1.93)</b> | <b>0.97</b><br><b>(0.24,1.70)</b> | <b>0.72</b><br><b>(0.07,1.37)</b> | 0.60 (-<br>0.21,1.40)             | BT+PC |

Results are presented as standardised mean differences (SMD) and 95% confidence intervals. BT: behavioural therapy, BT+PC: behavioural therapy delivered with physiotherapy care, CBT: cognitive behavioural therapy, CBT+PC: cognitive behavioural therapy delivered with physiotherapy care, CP: combined psychological approaches, CP+PC: combined psychological approaches delivered with physiotherapy care, Csl: counselling, GP care: general practitioner care, Mind+PC: mindfulness delivered with physiotherapy care, PC: physiotherapy care, PE: pain education, PE+PC: pain education delivered with physiotherapy care. Estimates in bold denote significance at  $p < 0.05$ . SMD values less than 0.00 favour the column-defining treatment node for the NMA results (lower left triangle) and the row-defining treatment nodes for the pairwise meta-analysis results (upper right triangle).

**Supplementary Figure 5.** Forest plots of network results for pain intensity at mid-term treatment sustainability

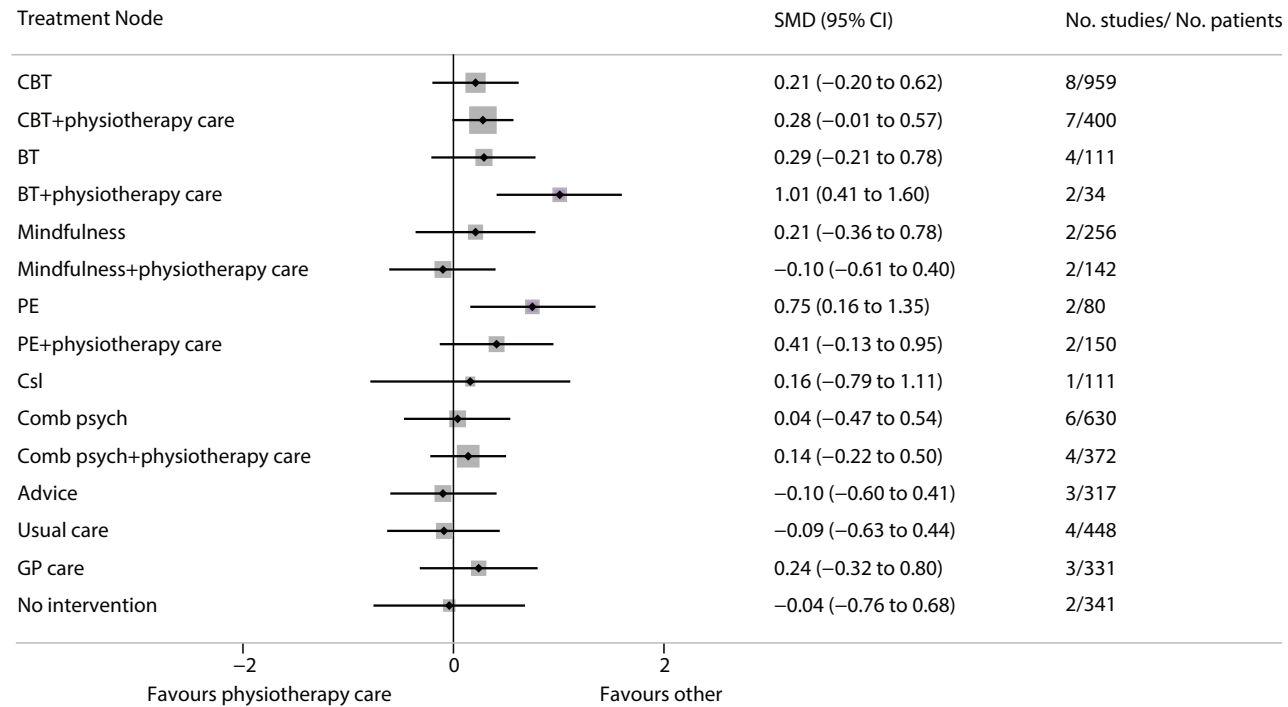

BT: behavioural therapy, CBT: cognitive behavioural therapy, Comb psych: combined psychological approaches, Csl: counselling, GP care: general practitioner care, PE: pain education. Physiotherapy care was considered the reference comparison group.

**Supplementary Table 10.8** Pain intensity at long-term treatment sustainability

|                        |                        |                        |                        |                        |                        |                         |                        |                         |                        |
|------------------------|------------------------|------------------------|------------------------|------------------------|------------------------|-------------------------|------------------------|-------------------------|------------------------|
| PC<br>(reference)      |                        | 0.03 (-<br>2.77,2.83)  |                        |                        |                        | 1.21<br>(0.22,2.64)     | 0.77 (-<br>1.52,3.06)  |                         | 0.40 (-<br>2.79,3.59)  |
| 0.56 (-<br>1.48,2.60)  | CP+PC                  |                        |                        |                        |                        |                         |                        |                         |                        |
| 0.79 (-<br>1.80,3.37)  | 0.22 (-<br>3.07,3.51)  | CBT                    | -0.07 (-<br>2.95,2.80) |                        |                        | -0.35 (-<br>3.15, 2.45) |                        |                         |                        |
| 0.71 (-<br>3.15,4.57)  | 0.15 (-<br>4.22,4.52)  | -0.07 (-<br>2.95,2.80) | GP care                |                        |                        |                         |                        | -0.92 (-<br>3.80, 1.96) |                        |
| -0.12 (-<br>6.42,6.18) | -0.68 (-<br>7.30,5.94) | -0.90 (-<br>6.65,4.84) | -0.83 (-<br>5.80,4.15) | PE                     | -0.18 (-<br>3.05,2.68) |                         |                        |                         |                        |
| -0.30 (-<br>5.91,5.31) | -0.86 (-<br>6.83,5.10) | -1.09 (-<br>6.06,3.89) | -1.01 (-<br>5.08,3.05) | -0.18 (-<br>3.05,2.68) | Usual Care             |                         |                        | 0.09 (-<br>2.78, 2.97)  |                        |
| 1.19 (-<br>0.10,2.48)  | 0.63 (-<br>1.79,3.04)  | 0.40 (-<br>2.18,2.98)  | 0.48 (-<br>3.39,4.34)  | 1.31 (-<br>4.99,7.60)  | 1.49 (-<br>4.12,7.10)  | CBT+PC                  | -0.05 (-<br>3.27,3.17) |                         |                        |
| 0.86 (-<br>1.12,2.84)  | 0.30 (-<br>2.54,3.14)  | 0.08 (-<br>3.10,3.25)  | 0.15 (-<br>4.13,4.43)  | 0.98 (-<br>5.58,7.54)  | 1.16 (-<br>4.74,7.07)  | -0.33 (-<br>2.47,1.81)  | BT+PC                  |                         | -0.25 (-<br>3.44,2.93) |
| -0.21 (-<br>5.02,4.61) | -0.77 (-<br>6.00,4.46) | -0.99 (-<br>5.06,3.07) | -0.92 (-<br>3.79,1.96) | -0.09 (-<br>4.15,3.97) | 0.09 (-<br>2.78,2.97)  | -1.39 (-<br>6.21,3.42)  | -1.07 (-<br>6.23,4.09) | CP                      |                        |
| 0.50 (-<br>2.21,3.22)  | -0.06 (-<br>3.45,3.34) | -0.28 (-<br>3.99,3.43) | -0.21 (-<br>4.90,4.49) | 0.62 (-<br>6.22,7.46)  | 0.81 (-<br>5.40,7.01)  | -0.68 (-<br>3.60,2.24)  | -0.36 (-<br>3.07,2.35) | 0.71 (-<br>4.79,6.22)   | BT                     |

Results are presented as standardised mean differences (SMD) and 95% confidence intervals. BT: behavioural therapy, BT+PC: behavioural therapy delivered with physiotherapy care, CBT: cognitive behavioural therapy, CBT+PC: cognitive behavioural therapy delivered with physiotherapy care, CP: combined psychological approaches, CP+PC: combined psychological approaches delivered with physiotherapy care, GP care: general practitioner care, PC: physiotherapy care, PE: pain education. Estimates in bold denote significance at  $p < 0.05$ . SMD values less than 0.00 favour the column-defining treatment node for the NMA results (lower left triangle) and the row-defining treatment nodes for the pairwise meta-analysis results (upper right triangle).

**Supplementary Figure 6.** Forest plots of network results for pain intensity at long-term treatment sustainability

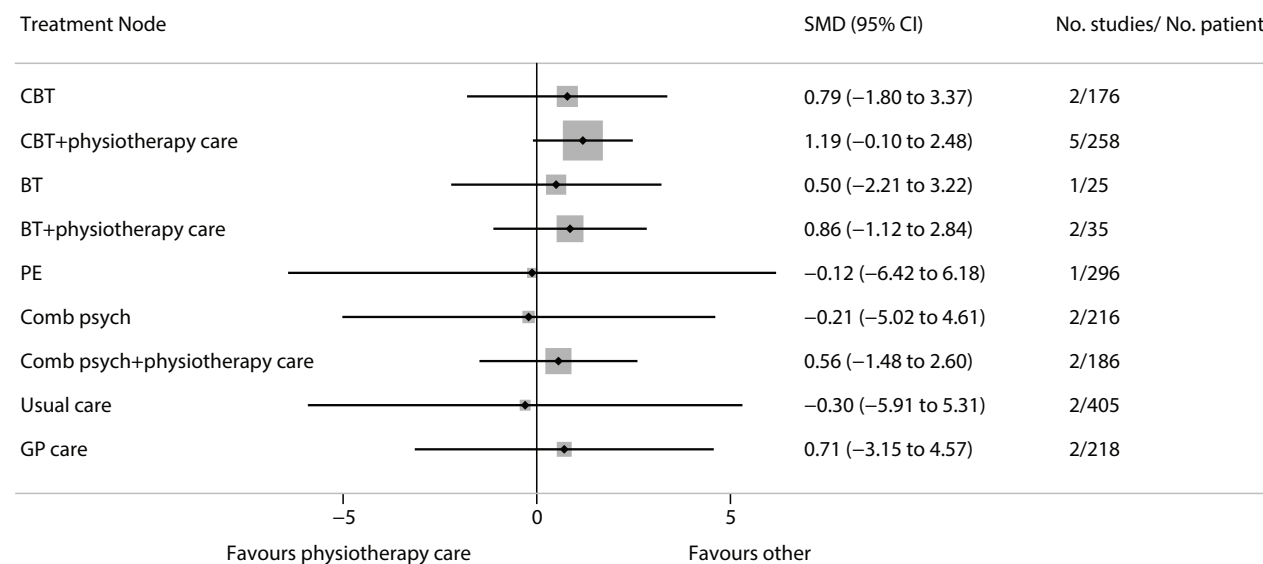

BT: behavioural therapy, CBT: cognitive behavioural therapy, Comb psych: combined psychological approaches, GP care: general practitioner care, PE: pain education. Physiotherapy care was considered the reference comparison group.

## Supplementary J. Risk of bias judgments

In the following tables, we present the risk of bias judgments for studies included in the NMA for physical function, pain intensity and fear avoidance.

**Supplementary Table 11.1** Risk of bias judgments for studies assessing physical function

| Author, Year                      | Domain 1:<br>Randomization<br>process | Domain 2:<br>Deviations from<br>intended<br>interventions | Domain 3:<br>Missing<br>outcome data | Domain 4:<br>Measurement<br>of the outcome | Domain 5:<br>Selection of the<br>reported result | Overall risk of bias |
|-----------------------------------|---------------------------------------|-----------------------------------------------------------|--------------------------------------|--------------------------------------------|--------------------------------------------------|----------------------|
| Alaranta, 1994[2]                 | Some concerns                         | Low                                                       | Low                                  | High                                       | Some concerns                                    | High                 |
| Aliyu, 2018[3]                    | Low                                   | Low                                                       | Low                                  | Some concerns                              | Some concerns                                    | Some concerns        |
| Bagheri, 2020[5]                  | Low                                   | Low                                                       | Low                                  | Some concerns                              | Some concerns                                    | Some concerns        |
| Bendix, 2000[8]                   | Some concerns                         | Low                                                       | Low                                  | Some concerns                              | Some concerns                                    | Some concerns        |
| Cherkin, 2016[11]                 | Low                                   | Low                                                       | Low                                  | Some concerns                              | Low                                              | Some concerns        |
| Chiauzzi, 2010[12]                | Low                                   | Low                                                       | Low                                  | Some concerns                              | Some concerns                                    | Some concerns        |
| Christiansen, 2010[13]            | Low                                   | Low                                                       | Low                                  | Some concerns                              | Some concerns                                    | Some concerns        |
| Dufour, 2010[15]                  | Low                                   | Low                                                       | Low                                  | Some concerns                              | Some concerns                                    | Some concerns        |
| Farokhi, 2020[17]                 | Some concerns                         | low                                                       | Low                                  | Some concerns                              | Some concerns                                    | Some concerns        |
| Friedrich, 1998[18] &<br>2005[19] | Some concerns                         | Low                                                       | Low                                  | Some concerns                              | Some concerns                                    | Some concerns        |
| Frost, 1998[20]                   | Low                                   | Low                                                       | Low                                  | Some concerns                              | Some concerns                                    | Some concerns        |
| Galan-Martin, 2020[21]            | Low                                   | Low                                                       | Low                                  | Some concerns                              | Some concerns                                    | Some concerns        |
| Gannon, 2019[22] (Study 1)        | Low                                   | Low                                                       | Low                                  | Some concerns                              | Some concerns                                    | Some concerns        |
| Gannon, 2019[22] (Study 2)        | Low                                   | Low                                                       | Low                                  | Some concerns                              | Some concerns                                    | Some concerns        |
| Gardner, 2019[23]                 | Low                                   | Low                                                       | Low                                  | Some concerns                              | Some concerns                                    | Some concerns        |
| Ghadyani, 2017[24]                | Some concerns                         | Low                                                       | Low                                  | Some concerns                              | Some concerns                                    | Some concerns        |
| Gibbs, 2018[25]                   | Low                                   | Low                                                       | Low                                  | Some concerns                              | High                                             | Some concerns        |
| Godfrey, 2019[28]                 | Low                                   | Some concerns                                             | Low                                  | Some concerns                              | Some concerns                                    | Some concerns        |
| Gould, 2020[29]                   | Some concerns                         | Low                                                       | Low                                  | Some concerns                              | Some concerns                                    | Some concerns        |
| Haas, 2005[31]                    | Some concerns                         | Low                                                       | Low                                  | Some concerns                              | Some concerns                                    | Some concerns        |
| Harris, 2017[32]                  | Low                                   | Low                                                       | Low                                  | Some concerns                              | Some concerns                                    | Some concerns        |
| Jensen, 2012[33]                  | Low                                   | Low                                                       | Low                                  | Some concerns                              | Some concerns                                    | Some concerns        |
| Johnson, 2007[34]                 | Low                                   | Low                                                       | Low                                  | Some concerns                              | Some concerns                                    | Some concerns        |
| Khan, 2014[36]                    | Low                                   | Low                                                       | Low                                  | Some concerns                              | Some concerns                                    | Some concerns        |
| Krein, 2013[38]                   | Low                                   | Low                                                       | Low                                  | Some concerns                              | Some concerns                                    | Some concerns        |
| Lamb, 2010[39, 40]                | Low                                   | Low                                                       | Low                                  | Some concerns                              | Low                                              | Some concerns        |
| Lambeek, 2010[41]                 | Low                                   | Low                                                       | Low                                  | Some concerns                              | Some concerns                                    | Some concerns        |
| Leeuw, 2008[42]                   | Low                                   | Low                                                       | Low                                  | Some concerns                              | Some concerns                                    | Some concerns        |
| Lorig, 2002[44]                   | Low                                   | Low                                                       | High                                 | Some concerns                              | Some concerns                                    | High                 |
| Macedo, 2012[46]                  | Low                                   | Low                                                       | Low                                  | Some concerns                              | Some concerns                                    | Some concerns        |
| Magalhaes, 2017[47]               | Low                                   | Low                                                       | Low                                  | Some concerns                              | Some concerns                                    | Some concerns        |
| Magnussen, 2007[48]               | Low                                   | Low                                                       | Low                                  | Some concerns                              | Some concerns                                    | Some concerns        |
| Mehling, 2005[49]                 | Low                                   | Low                                                       | Low                                  | Some concerns                              | Some concerns                                    | Some concerns        |
| Monticone, 2013[51]               | Low                                   | Low                                                       | Low                                  | Some concerns                              | Some concerns                                    | Some concerns        |
| Monticone, 2016[52]               | Low                                   | Low                                                       | Low                                  | Some concerns                              | Some concerns                                    | Some concerns        |
| Moore, 2000[53]                   | Low                                   | Low                                                       | Low                                  | Some concerns                              | Some concerns                                    | Some concerns        |
| Morone, 2016[54]                  | Low                                   | Low                                                       | Low                                  | Some concerns                              | Low                                              | Some concerns        |
| Moseley, 2004[57]                 | Low                                   | Low                                                       | Low                                  | Some concerns                              | Some concerns                                    | Some concerns        |
| Nguyen, 2017[58]                  | Low                                   | Low                                                       | Low                                  | Some concerns                              | Some concerns                                    | Some concerns        |
| O'Keeffe, 2020[60]                | Low                                   | Low                                                       | Low                                  | Some concerns                              | Some concerns                                    | Some concerns        |
| Pardo, 2018[62]                   | Low                                   | Low                                                       | Low                                  | Some concerns                              | Some concerns                                    | Some concerns        |
| Petrozzi, 2019[63]                | Low                                   | Low                                                       | Low                                  | Some concerns                              | Some concerns                                    | Some concerns        |
| Pires, 2015[64]                   | Low                                   | Low                                                       | Low                                  | Some concerns                              | Some concerns                                    | Some concerns        |
| Poole, 2007[65]                   | Low                                   | Low                                                       | Low                                  | Some concerns                              | Some concerns                                    | Some concerns        |
| Rabiei, 2020[66]                  | Low                                   | Low                                                       | Low                                  | Some concerns                              | Some concerns                                    | Some concerns        |
| Rizzo, 2018[69]                   | Low                                   | Low                                                       | Low                                  | Some concerns                              | Some concerns                                    | Some concerns        |
| Sander, 2020[71]                  | Low                                   | Low                                                       | Low                                  | Some concerns                              | Low                                              | Some concerns        |
| Santaella da Fonseca,<br>2009[72] | Low                                   | Low                                                       | Low                                  | Some concerns                              | Some concerns                                    | Some concerns        |
| Saper, 2017[73]                   | Low                                   | Low                                                       | Low                                  | Some concerns                              | Some concerns                                    | Some concerns        |
| Saracoglu, 2020[74]               | Low                                   | Some concerns                                             | Low                                  | Some concerns                              | Some concerns                                    | Some concerns        |
| Siemonsma, 2013[78]               | Low                                   | Some concerns                                             | Low                                  | Some concerns                              | Some concerns                                    | Some concerns        |
| Smeets, 2008[79]                  | Low                                   | Some concerns                                             | Low                                  | Some concerns                              | Low                                              | Some concerns        |
| Stuckey, 1986[83]                 | Some concerns                         | Some concerns                                             | Low                                  | Some concerns                              | Some concerns                                    | Some concerns        |

|                       |               |     |      |               |               |               |
|-----------------------|---------------|-----|------|---------------|---------------|---------------|
| Tavafian, 2017[85]    | Low           | Low | Low  | Some concerns | Some concerns | Some concerns |
| Tekur, 2008[86]       | Low           | Low | Low  | Some concerns | Some concerns | Some concerns |
| Tilbrook, 2011[87]    | Low           | Low | Low  | Some concerns | Some concerns | Some concerns |
| Unal, 2020[92]        | Low           | Low | Low  | Some concerns | Some concerns | Some concerns |
| Vibe Fersum, 2019[94] | Low           | Low | Low  | Some concerns | Some concerns | Some concerns |
| Von Korff, 2005[95]   | Some concerns | Low | Low  | Some concerns | Some concerns | Some concerns |
| Woods, 2008[97]       | Low           | Low | High | Some concerns | Some concerns | High          |

**Supplementary Table 11.2** Risk of bias judgments for studies assessing pain intensity

| <b>Author, Year</b>            | <b>Domain 1:<br/>Randomization<br/>process</b> | <b>Domain 2:<br/>Deviations from<br/>intended<br/>interventions</b> | <b>Domain 3:<br/>Missing<br/>outcome data</b> | <b>Domain 4:<br/>Measurement<br/>of the outcome</b> | <b>Domain 5:<br/>Selection of the<br/>reported result</b> | <b>Overall risk of bias</b> |
|--------------------------------|------------------------------------------------|---------------------------------------------------------------------|-----------------------------------------------|-----------------------------------------------------|-----------------------------------------------------------|-----------------------------|
| Aliyu, 2018[3]                 | Low                                            | Low                                                                 | Low                                           | Some concerns                                       | Some concerns                                             | Some concerns               |
| Bendix, 2000[8]                | Some concerns                                  | Low                                                                 | Low                                           | Some concerns                                       | Some concerns                                             | Some concerns               |
| Cherkin, 2016[11]              | Low                                            | Low                                                                 | Low                                           | Some concerns                                       | Low                                                       | Some concerns               |
| Chiauzzi, 2010[12]             | Low                                            | Low                                                                 | Low                                           | Some concerns                                       | Some concerns                                             | Some concerns               |
| Christiansen, 2010[13]         | Low                                            | Low                                                                 | Low                                           | Some concerns                                       | Some concerns                                             | Some concerns               |
| Dufour, 2010[15]               | Low                                            | Low                                                                 | Low                                           | Some concerns                                       | Some concerns                                             | Some concerns               |
| Friedrich, 1998[18] & 2005[19] | Low                                            | Low                                                                 | Low                                           | Some concerns                                       | Some concerns                                             | Some concerns               |
| Galan-Martin, 2020[21]         | Low                                            | Low                                                                 | Low                                           | Some concerns                                       | Some concerns                                             | Some concerns               |
| Gannon, 2019[22] (Study 1)     | Low                                            | Low                                                                 | Low                                           | Some concerns                                       | Some concerns                                             | Some concerns               |
| Gannon, 2019[22] (Study 2)     | Low                                            | Low                                                                 | Low                                           | Some concerns                                       | Some concerns                                             | Some concerns               |
| Gardner, 2019[23]              | Low                                            | Low                                                                 | Low                                           | Some concerns                                       | Some concerns                                             | Some concerns               |
| Ghadyani, 2017[24]             | Some concerns                                  | Low                                                                 | Low                                           | Some concerns                                       | Some concerns                                             | Some concerns               |
| Gibbs, 2018[25]                | Low                                            | Low                                                                 | Low                                           | Some concerns                                       | High                                                      | Some concerns               |
| Godfrey, 2019[28]              | Low                                            | Some concerns                                                       | Low                                           | Some concerns                                       | Some concerns                                             | Some concerns               |
| Gould, 2020[29]                | Some concerns                                  | Low                                                                 | Low                                           | Some concerns                                       | Some concerns                                             | Some concerns               |
| Haas, 2005[31]                 | Low                                            | Low                                                                 | Low                                           | Some concerns                                       | Some concerns                                             | Some concerns               |
| Jensen, 2012[33]               | Low                                            | Low                                                                 | Low                                           | Some concerns                                       | Some concerns                                             | Some concerns               |
| Johnson, 2007[34]              | Low                                            | Low                                                                 | Low                                           | Some concerns                                       | Some concerns                                             | Some concerns               |
| Khan, 2014[36]                 | Low                                            | Low                                                                 | Low                                           | Some concerns                                       | Some concerns                                             | Some concerns               |
| Khodadad, 2020[37]             | Low                                            | Some concerns                                                       | Some concerns                                 | Some concerns                                       | Some concerns                                             | Some concerns               |
| Krein, 2013[38]                | Low                                            | Low                                                                 | Low                                           | Some concerns                                       | Some concerns                                             | Some concerns               |
| Lamb, 2010[39, 40]             | Low                                            | Low                                                                 | Low                                           | Some concerns                                       | low                                                       | Some concerns               |
| Lambeek, 2010[41]              | Low                                            | Low                                                                 | Low                                           | Some concerns                                       | Some concerns                                             | Some concerns               |
| Leeuw, 2008[42]                | Low                                            | Low                                                                 | Low                                           | Some concerns                                       | Some concerns                                             | Some concerns               |
| Lorig, 2002[44]                | Low                                            | Low                                                                 | High                                          | Some concerns                                       | Some concerns                                             | High                        |
| Louw, 2017[45]                 | Low                                            | Low                                                                 | Low                                           | Some concerns                                       | Some concerns                                             | Some concerns               |
| Macedo, 2012[46]               | Low                                            | Low                                                                 | Low                                           | Some concerns                                       | Some concerns                                             | Some concerns               |
| Magalhaes, 2017[47]            | Low                                            | Low                                                                 | Low                                           | Some concerns                                       | Some concerns                                             | Some concerns               |
| Mehling, 2005[49]              | Low                                            | Low                                                                 | Low                                           | Some concerns                                       | Some concerns                                             | Some concerns               |
| Monticone, 2013[51]            | Low                                            | Low                                                                 | Low                                           | Some concerns                                       | Some concerns                                             | Some concerns               |
| Monticone, 2016[52]            | Low                                            | Low                                                                 | Low                                           | Some concerns                                       | Some concerns                                             | Some concerns               |
| Moore, 2000[53]                | Low                                            | Low                                                                 | Low                                           | Some concerns                                       | Some concerns                                             | Some concerns               |
| Morone, 2016[54]               | Low                                            | Low                                                                 | Low                                           | Some concerns                                       | Low                                                       | Some concerns               |
| Nguyen, 2017[58]               | Low                                            | Low                                                                 | Low                                           | Some concerns                                       | Some concerns                                             | Some concerns               |
| Nicholas, 1991[59]             | Low                                            | Low                                                                 | Low                                           | Some concerns                                       | High                                                      | High                        |
| O'Keeffe, 2020[60]             | Low                                            | Low                                                                 | Low                                           | Some concerns                                       | Some concerns                                             | Some concerns               |
| Paolucci, 2017[61]             | Low                                            | Low                                                                 | Low                                           | Some concerns                                       | Some concerns                                             | Some concerns               |
| Pardo, 2018[62]                | Low                                            | Low                                                                 | Low                                           | Some concerns                                       | Some concerns                                             | Some concerns               |
| Petrozzi, 2019[63]             | Low                                            | Low                                                                 | Low                                           | Some concerns                                       | Some concerns                                             | Some concerns               |
| Pires, 2015[64]                | Low                                            | Low                                                                 | Low                                           | Some concerns                                       | Some concerns                                             | Some concerns               |
| Poole, 2007[65]                | Low                                            | Low                                                                 | Low                                           | Some concerns                                       | Some concerns                                             | Some concerns               |
| Rabiei, 2020[66]               | Low                                            | Low                                                                 | Low                                           | Some concerns                                       | Some concerns                                             | Some concerns               |
| Reiner, 2019[67]               | Low                                            | Low                                                                 | Low                                           | Some concerns                                       | High                                                      | High                        |
| Rizzo, 2018[69]                | Low                                            | Low                                                                 | Low                                           | Some concerns                                       | Some concerns                                             | Some concerns               |
| Sander, 2020[71]               | Low                                            | Low                                                                 | Low                                           | Some concerns                                       | Low                                                       | Some concerns               |
| Santaella da Fonseca, 2009[72] | Low                                            | Low                                                                 | Low                                           | Some concerns                                       | Some concerns                                             | Some concerns               |
| Saper, 2017[73]                | Low                                            | Low                                                                 | Low                                           | Some concerns                                       | Some concerns                                             | Some concerns               |
| Saracoglu, 2020[74]            | Low                                            | Some concerns                                                       | Low                                           | Some concerns                                       | Low                                                       | Some concerns               |
| Saracoglu, 2020[75]            | Some concerns                                  | Some concerns                                                       | Low                                           | Some concerns                                       | Some concerns                                             | Some concerns               |
| Schaller, 2016[76]             | Low                                            | Low                                                                 | Low                                           | Some concerns                                       | Some concerns                                             | Some concerns               |
| Shariat, 2019[77]              | Some concerns                                  | Some concerns                                                       | Low                                           | Some concerns                                       | Some concerns                                             | Some concerns               |



|                     |               |               |     |               |               |               |
|---------------------|---------------|---------------|-----|---------------|---------------|---------------|
| Smeets, 2008[79]    | Low           | Some concerns | Low | Some concerns | Low           | Some concerns |
| Soleymani, 2021[81] | Low           | Low           | Low | Some concerns | Some concerns | Some concerns |
| Sorensen, 2010[82]  | Low           | Low           | Low | Some concerns | Some concerns | Some concerns |
| Stuckey, 1986[83]   | Some concerns | Some concerns | Low | Some concerns | Some concerns | Some concerns |
| Tavafian, 2017[85]  | Low           | Low           | Low | Some concerns | Some concerns | Some concerns |
| Turner, 1982[88]    | Some concerns | Some concerns | Low | Some concerns | Some concerns | Some concerns |
| Turner, 1988[89]    | Some concerns | Some concerns | Low | Some concerns | Some concerns | Some concerns |
| Turner, 1990[90]    | Some concerns | Some concerns | Low | Some concerns | Some concerns | Some concerns |
| Turner, 1993[91]    | Some concerns | Some concerns | Low | Some concerns | Some concerns | Some concerns |

**Supplementary Table 11.3** Risk of bias judgments for studies assessing fear avoidance

| <b>Author, Year</b>        | <b>Domain 1:<br/>Randomization<br/>process</b> | <b>Domain 2:<br/>Deviations from<br/>intended<br/>interventions</b> | <b>Domain 3:<br/>Missing<br/>outcome data</b> | <b>Domain 4:<br/>Measurement<br/>of the outcome</b> | <b>Domain 5:<br/>Selection of the<br/>reported result</b> | <b>Overall risk of bias</b> |
|----------------------------|------------------------------------------------|---------------------------------------------------------------------|-----------------------------------------------|-----------------------------------------------------|-----------------------------------------------------------|-----------------------------|
| Aliyu, 2018[3]             | Low                                            | Low                                                                 | Low                                           | Some concerns                                       | Some concerns                                             | Some concerns               |
| Chiauzzi, 2010[12]         | Low                                            | Low                                                                 | Low                                           | Some concerns                                       | Some concerns                                             | Some concerns               |
| Farokhi, 2020[17]          | Some concerns                                  | Low                                                                 | Low                                           | Some concerns                                       | Some concerns                                             | Some concerns               |
| Galan-Martin, 2020[21]     | Low                                            | Low                                                                 | Low                                           | Some concerns                                       | Some concerns                                             | Some concerns               |
| Gannon, 2019[22] (Study 1) | Low                                            | Low                                                                 | Low                                           | Some concerns                                       | Some concerns                                             | Some concerns               |
| Gannon, 2019[22] (Study 2) | Low                                            | Low                                                                 | Low                                           | Some concerns                                       | Some concerns                                             | Some concerns               |
| Gardner, 2019[23]          | Low                                            | Low                                                                 | Low                                           | Some concerns                                       | Some concerns                                             | Some concerns               |
| Jensen, 2012[33]           | Low                                            | Low                                                                 | Low                                           | Some concerns                                       | Some concerns                                             | Some concerns               |
| Krein, 2013[38]            | Low                                            | Low                                                                 | Low                                           | Some concerns                                       | Some concerns                                             | Some concerns               |
| Lamb, 2010[39, 40]         | Low                                            | Low                                                                 | Low                                           | Some concerns                                       | Low                                                       | Some concerns               |
| Leeuw, 2008[42]            | Low                                            | Low                                                                 | Low                                           | Some concerns                                       | Some concerns                                             | Some concerns               |
| Magalhaes, 2017[47]        | Low                                            | Low                                                                 | Low                                           | Some concerns                                       | Some concerns                                             | Some concerns               |
| Magnussen, 2007[48]        | Low                                            | Low                                                                 | Low                                           | Some concerns                                       | Some concerns                                             | Some concerns               |
| Monticone, 2013[51]        | Low                                            | Low                                                                 | Low                                           | Some concerns                                       | Some concerns                                             | Some concerns               |
| Monticone, 2016[52]        | Low                                            | Low                                                                 | Low                                           | Some concerns                                       | Some concerns                                             | Some concerns               |
| Moore, 2000[53]            | Low                                            | Low                                                                 | Low                                           | Some concerns                                       | Some concerns                                             | Some concerns               |
| Morone, 2016[54]           | Low                                            | Low                                                                 | Low                                           | Some concerns                                       | Low                                                       | Some concerns               |
| Moseley, 2004[57]          | Low                                            | Low                                                                 | Low                                           | Some concerns                                       | Some concerns                                             | Some concerns               |
| O'Keefe, 2020[60]          | Low                                            | Low                                                                 | Low                                           | Some concerns                                       | Some concerns                                             | Some concerns               |
| Pardo, 2018[62]            | Low                                            | Low                                                                 | Low                                           | Some concerns                                       | Some concerns                                             | Some concerns               |
| Petrozzi, 2019[63]         | Low                                            | Low                                                                 | Low                                           | Some concerns                                       | Some concerns                                             | Some concerns               |
| Pires, 2015[64]            | Low                                            | Low                                                                 | Low                                           | Some concerns                                       | Some concerns                                             | Some concerns               |
| Rabiei, 2020[66]           | Low                                            | Low                                                                 | Low                                           | Some concerns                                       | Some concerns                                             | Some concerns               |
| Rizzo, 2018[69]            | Low                                            | Low                                                                 | Low                                           | Some concerns                                       | Some concerns                                             | Some concerns               |
| Sorensen, 2010[82]         | Low                                            | Low                                                                 | Low                                           | Some concerns                                       | Some concerns                                             | Some concerns               |
| Unal, 2020[92]             | Low                                            | Low                                                                 | Low                                           | Some concerns                                       | Some concerns                                             | Some concerns               |
| Vibe Fersum, 2019[94]      | Low                                            | Low                                                                 | Low                                           | Some concerns                                       | Some concerns                                             | Some concerns               |
| Von Korf, 2005[95]         | Some concerns                                  | Low                                                                 | Low                                           | Some concerns                                       | Some concerns                                             | Some concerns               |
| Woods, 2008[97]            | Low                                            | Low                                                                 | High                                          | Some concerns                                       | Some concerns                                             | High                        |

## Supplementary K. CINeMA results for physical function and pain intensity

Judgments of the confidence in cumulative evidence were evaluated using the Confidence in Network Meta-Analysis (CINeMA) framework,[102-104] a web application of the Grading of Recommendations Assessment, Development and Evaluation (GRADE) ratings approach.

In CINeMA, the default confidence rating for each comparison is “high confidence.” Confidence ratings per comparison were assessed according to the following steps. First, we assigned a point scale to the domain-level judgments: “no concerns” was 0 points, “some concerns” was 0.5 points, “major concerns” was 1 point. Then, we downgraded the confidence rating, for each comparison, by: (i) one level (i.e., “moderate confidence”), if there was a reduction of  $\geq 1$  but  $< 2$  points across all domains; two levels (i.e., “low confidence”), if there was a reduction of  $\geq 2$  but  $< 3$  points across all domains; (ii) three levels (i.e., “very low confidence”), if there was a reduction of  $\geq 3$  points across all domains.

**Supplementary Table 12.1** Physical function at post-intervention

| Comparison   | n studies | Within-study bias | Reporting bias | Indirectness | Imprecision    | Heterogeneity | Incoherence | Confidence rating |
|--------------|-----------|-------------------|----------------|--------------|----------------|---------------|-------------|-------------------|
| Adv:BT       | 1         | Some concerns     | Undetected     | No concerns  | Major concerns | No concerns   | No concerns | Moderate          |
| Adv:CBT      | 1         | Some concerns     | Undetected     | No concerns  | Some concerns  | Some concerns | No concerns | Moderate          |
| Adv:Mind     | 1         | Some concerns     | Undetected     | No concerns  | Some concerns  | Some concerns | No concerns | Moderate          |
| Adv:PE       | 1         | Some concerns     | Undetected     | No concerns  | Major concerns | No concerns   | No concerns | Moderate          |
| BT:CBT       | 2         | Some concerns     | Undetected     | No concerns  | Some concerns  | Some concerns | No concerns | Moderate          |
| BT:NI        | 1         | Some concerns     | Undetected     | No concerns  | Some concerns  | Some concerns | No concerns | Moderate          |
| BT:PC        | 1         | Some concerns     | Undetected     | No concerns  | Major concerns | No concerns   | No concerns | Moderate          |
| BT:UC        | 1         | Some concerns     | Undetected     | No concerns  | Major concerns | No concerns   | No concerns | Moderate          |
| BT+PC:CP+PC  | 1         | Some concerns     | Undetected     | No concerns  | Major concerns | No concerns   | No concerns | Moderate          |
| CBT:CBT+PC   | 1         | Some concerns     | Undetected     | No concerns  | Some concerns  | Some concerns | No concerns | Moderate          |
| CBT:GP       | 1         | Some concerns     | Undetected     | No concerns  | Major concerns | No concerns   | No concerns | Moderate          |
| CBT:Mind     | 1         | Some concerns     | Undetected     | No concerns  | Major concerns | No concerns   | No concerns | Moderate          |
| CBT:NI       | 3         | Some concerns     | Undetected     | No concerns  | Some concerns  | Some concerns | No concerns | Moderate          |
| CBT:PC       | 1         | Some concerns     | Undetected     | No concerns  | Some concerns  | Some concerns | No concerns | Moderate          |
| CBT:UC       | 1         | Some concerns     | Undetected     | No concerns  | Some concerns  | Some concerns | No concerns | Moderate          |
| CBT+PC:CP+PC | 1         | Some concerns     | Undetected     | No concerns  | No concerns    | Some concerns | No concerns | Moderate          |
| CBT+PC:NI    | 1         | Some concerns     | Undetected     | No concerns  | No concerns    | Some concerns | No concerns | Moderate          |

|              |   |               |            |             |                |                |                |          |
|--------------|---|---------------|------------|-------------|----------------|----------------|----------------|----------|
| CBT+PC:PE+PC | 1 | Some concerns | Undetected | No concerns | Some concerns  | Some concerns  | No concerns    | Moderate |
| CBT+PC:PC    | 8 | Some concerns | Undetected | No concerns | No concerns    | Some concerns  | No concerns    | Moderate |
| CP:GP        | 1 | Some concerns | Undetected | No concerns | Major concerns | No concerns    | No concerns    | Moderate |
| CP:CP+PC     | 3 | Some concerns | Undetected | No concerns | Some concerns  | Some concerns  | No concerns    | Moderate |
| CP:NI        | 1 | Some concerns | Undetected | No concerns | Major concerns | No concerns    | No concerns    | Moderate |
| CP:PE        | 1 | Some concerns | Undetected | No concerns | Some concerns  | Some concerns  | No concerns    | Moderate |
| CP:UC        | 3 | Some concerns | Undetected | No concerns | Some concerns  | Some concerns  | No concerns    | Moderate |
| CP+PC:PE     | 1 | Some concerns | Undetected | No concerns | Major concerns | No concerns    | No concerns    | Moderate |
| CP+PC:PC     | 4 | Some concerns | Undetected | No concerns | Some concerns  | Some concerns  | No concerns    | Moderate |
| Csl:UC       | 1 | Some concerns | Undetected | No concerns | Major concerns | No concerns    | No concerns    | Moderate |
| Csl+PC:PE+PC | 1 | Some concerns | Undetected | No concerns | Major concerns | No concerns    | Some concerns  | Low      |
| Csl+PC:PC    | 1 | Some concerns | Undetected | No concerns | No concerns    | Some concerns  | Major concerns | Low      |
| Mind:UC      | 1 | Some concerns | Undetected | No concerns | Some concerns  | Some concerns  | No concerns    | Moderate |
| Mind+PC:PE   | 1 | Some concerns | Undetected | No concerns | Major concerns | No concerns    | No concerns    | Moderate |
| Mind+PC:PC   | 1 | Some concerns | Undetected | No concerns | Major concerns | No concerns    | No concerns    | Moderate |
| PE:PC        | 2 | Some concerns | Undetected | No concerns | Some concerns  | Some concerns  | No concerns    | Moderate |
| PE+PC:PC     | 5 | Some concerns | Undetected | No concerns | No concerns    | Major concerns | No concerns    | Moderate |
| PC:UC        | 1 | Some concerns | Undetected | No concerns | Major concerns | No concerns    | No concerns    | Moderate |
| Adv:BT+PC    | 0 | Some concerns | Undetected | No concerns | Major concerns | No concerns    | No concerns    | Moderate |
| Adv:CBT+PC   | 0 | Some concerns | Undetected | No concerns | No concerns    | Some concerns  | No concerns    | Moderate |
| Adv:CP       | 0 | Some concerns | Undetected | No concerns | Major concerns | No concerns    | No concerns    | Moderate |
| Adv:CP+PC    | 0 | Some concerns | Undetected | No concerns | Major concerns | No concerns    | No concerns    | Moderate |
| Adv:Csl      | 0 | Some concerns | Undetected | No concerns | Major concerns | No concerns    | No concerns    | Moderate |
| Adv:Csl+PC   | 0 | Some concerns | Undetected | No concerns | Some concerns  | Some concerns  | No concerns    | Moderate |
| Adv:GP       | 0 | Some concerns | Undetected | No concerns | Major concerns | No concerns    | No concerns    | Moderate |
| Adv:Mind+PC  | 0 | Some concerns | Undetected | No concerns | Major concerns | No concerns    | No concerns    | Moderate |
| Adv:NI       | 0 | Some concerns | Undetected | No concerns | Major concerns | No concerns    | No concerns    | Moderate |
| Adv:PE+PC    | 0 | Some concerns | Undetected | No concerns | Some concerns  | Some concerns  | No concerns    | Moderate |
| Adv:PC       | 0 | Some concerns | Undetected | No concerns | Major concerns | No concerns    | No concerns    | Moderate |
| Adv:UC       | 0 | Some concerns | Undetected | No concerns | Major concerns | No concerns    | No concerns    | Moderate |







|               |   |               |            |             |                |               |             |          |
|---------------|---|---------------|------------|-------------|----------------|---------------|-------------|----------|
| Mind:PE+PC    | 0 | Some concerns | Undetected | No concerns | Major concerns | No concerns   | No concerns | Moderate |
| Mind:PC       | 0 | Some concerns | Undetected | No concerns | Some concerns  | Some concerns | No concerns | Moderate |
| Mind+PC:NI    | 0 | Some concerns | Undetected | No concerns | Major concerns | No concerns   | No concerns | Moderate |
| Mind+PC:PE+PC | 0 | Some concerns | Undetected | No concerns | Major concerns | No concerns   | No concerns | Moderate |
| Mind+PC:UC    | 0 | Some concerns | Undetected | No concerns | Major concerns | No concerns   | No concerns | Moderate |
| NI:PE         | 0 | Some concerns | Undetected | No concerns | Major concerns | No concerns   | No concerns | Moderate |
| NI:PE+PC      | 0 | Some concerns | Undetected | No concerns | Some concerns  | Some concerns | No concerns | Moderate |
| NI:PC         | 0 | Some concerns | Undetected | No concerns | Some concerns  | Some concerns | No concerns | Moderate |
| NI:UC         | 0 | Some concerns | Undetected | No concerns | Major concerns | No concerns   | No concerns | Moderate |
| PE:PE+PC      | 0 | Some concerns | Undetected | No concerns | Some concerns  | Some concerns | No concerns | Moderate |
| PE:UC         | 0 | Some concerns | Undetected | No concerns | Major concerns | No concerns   | No concerns | Moderate |
| PE+PE:UC      | 0 | Some concerns | Undetected | No concerns | Some concerns  | Some concerns | No concerns | Moderate |

Adv: advice, BT: behavioural therapy, BT+PC: behavioural therapy delivered with physiotherapy care, CBT: cognitive behavioural therapy, CBT+PC: cognitive behavioural therapy delivered with physiotherapy care, CP: combined psychological approaches, CP+PC: combined psychological approaches delivered with physiotherapy care, Csl: counselling, Csl+PC: counselling delivered with physiotherapy care, GP: general practitioner care, Mind: mindfulness, Mind+PC: mindfulness delivered with physiotherapy care, NI: no intervention, PC: physiotherapy care, PE: pain education, PE+PC: pain education delivered with physiotherapy care, UC: usual care.

**Supplementary Table 12.2** Physical function at short-term treatment sustainability

| Comparison   | n studies | Within-study bias | Reporting bias | Indirectness | Imprecision    | Heterogeneity  | Incoherence    | Confidence rating |
|--------------|-----------|-------------------|----------------|--------------|----------------|----------------|----------------|-------------------|
| Adv:CBT      | 1         | Some concerns     | Undetected     | No concerns  | Major concerns | No concerns    | No concerns    | Moderate          |
| Adv:CBT+PC   | 1         | Some concerns     | Undetected     | No concerns  | Some concerns  | Some concerns  | No concerns    | Moderate          |
| BT:PC        | 1         | Some concerns     | Undetected     | No concerns  | Major concerns | No concerns    | No concerns    | Moderate          |
| BT:UC        | 1         | Some concerns     | Undetected     | No concerns  | Some concerns  | Some concerns  | No concerns    | Moderate          |
| CBT:NI       | 1         | Some concerns     | Undetected     | No concerns  | Some concerns  | Some concerns  | No concerns    | Moderate          |
| CBT+PC:CP+PC | 1         | Some concerns     | Undetected     | No concerns  | Some concerns  | No concerns    | No concerns    | Moderate          |
| CBT+PC:PE+PC | 1         | Some concerns     | Undetected     | No concerns  | No concerns    | Major concerns | Major concerns | Low               |
| CBT+PC:PC    | 2         | Some concerns     | Undetected     | No concerns  | No concerns    | Some concerns  | Some concerns  | Moderate          |
| CP:CP+PC     | 1         | Some concerns     | Undetected     | No concerns  | No concerns    | Major concerns | No concerns    | Moderate          |

|             |   |               |            |             |                |                |                |          |
|-------------|---|---------------|------------|-------------|----------------|----------------|----------------|----------|
| CP:GP       | 2 | Some concerns | Undetected | No concerns | Some concerns  | Some concerns  | Major concerns | Low      |
| CP:NI       | 1 | Some concerns | Undetected | No concerns | Some concerns  | Some concerns  | No concerns    | Moderate |
| CP:PE       | 1 | Some concerns | Undetected | No concerns | Some concerns  | Some concerns  | No concerns    | Moderate |
| CP:UC       | 3 | Some concerns | Undetected | No concerns | Some concerns  | Some concerns  | No concerns    | Moderate |
| CP+PC:PE    | 1 | Some concerns | Undetected | No concerns | No concerns    | Major concerns | No concerns    | Moderate |
| CP+PC:PC    | 3 | Some concerns | Undetected | No concerns | Some concerns  | No concerns    | No concerns    | Moderate |
| Mind+PC:PC  | 1 | Some concerns | Undetected | No concerns | Some concerns  | Some concerns  | Major concerns | Low      |
| PE:PC       | 1 | Some concerns | Undetected | No concerns | Some concerns  | No concerns    | Some concerns  | Moderate |
| PE+PC:PC    | 4 | Some concerns | Undetected | No concerns | No concerns    | Some concerns  | Major concerns | Low      |
| PC:UC       | 1 | Some concerns | Undetected | No concerns | Some concerns  | Some concerns  | No concerns    | Moderate |
| Adv:BT      | 0 | Some concerns | Undetected | No concerns | Major concerns | No concerns    | Major concerns | Low      |
| Adv:CP      | 0 | Some concerns | Undetected | No concerns | Major concerns | No concerns    | Major concerns | Low      |
| Adv:CP+PC   | 0 | Some concerns | Undetected | No concerns | Major concerns | No concerns    | Major concerns | Low      |
| Adv:GP      | 0 | Some concerns | Undetected | No concerns | Major concerns | No concerns    | Major concerns | Low      |
| Adv:Mind+PC | 0 | Some concerns | Undetected | No concerns | Major concerns | No concerns    | Major concerns | Low      |
| Adv:NI      | 0 | Some concerns | Undetected | No concerns | Some concerns  | Some concerns  | Major concerns | Low      |
| Adv:PE      | 0 | Some concerns | Undetected | No concerns | Major concerns | No concerns    | Major concerns | Low      |
| Adv:PE+PC   | 0 | Some concerns | Undetected | No concerns | Some concerns  | Some concerns  | Major concerns | Low      |
| Adv:PC      | 0 | Some concerns | Undetected | No concerns | Some concerns  | Some concerns  | Major concerns | Low      |
| Adv:UC      | 0 | Some concerns | Undetected | No concerns | Major concerns | No concerns    | Major concerns | Low      |
| BT:CBT      | 0 | Some concerns | Undetected | No concerns | Major concerns | No concerns    | Major concerns | Low      |
| BT:CBT+PC   | 0 | Some concerns | Undetected | No concerns | Some concerns  | No concerns    | Major concerns | Low      |
| BT:CP       | 0 | Some concerns | Undetected | No concerns | Some concerns  | Some concerns  | Major concerns | Low      |
| BT:CP+PC    | 0 | Some concerns | Undetected | No concerns | Some concerns  | Some concerns  | Major concerns | Low      |
| BT:GP       | 0 | Some concerns | Undetected | No concerns | Major concerns | No concerns    | Major concerns | Low      |
| BT:Mind+PC  | 0 | Some concerns | Undetected | No concerns | Major concerns | No concerns    | Major concerns | Low      |
| BT:NI       | 0 | Some concerns | Undetected | No concerns | Major concerns | No concerns    | Major concerns | Low      |
| BT:PE       | 0 | Some concerns | Undetected | No concerns | Some concerns  | Some concerns  | Major concerns | Low      |
| BT:PE+PC    | 0 | Some concerns | Undetected | No concerns | Some concerns  | No concerns    | Major concerns | Low      |
| CBT:CBT+PC  | 0 | Some concerns | Undetected | No concerns | Some concerns  | Some concerns  | Major concerns | Low      |





|               |   |               |            |             |                |               |                |     |
|---------------|---|---------------|------------|-------------|----------------|---------------|----------------|-----|
| Mind+PC:PE+PC | 0 | Some concerns | Undetected | No concerns | Some concerns  | Some concerns | Major concerns | Low |
| Mind+PC:UC    | 0 | Some concerns | Undetected | No concerns | Major concerns | No concerns   | Major concerns | Low |
| NI:PE         | 0 | Some concerns | Undetected | No concerns | Some concerns  | Some concerns | Major concerns | Low |
| NI:PE+PC      | 0 | Some concerns | Undetected | No concerns | Some concerns  | No concerns   | Major concerns | Low |
| NI:PC         | 0 | Some concerns | Undetected | No concerns | Major concerns | No concerns   | Major concerns | Low |
| NI:UC         | 0 | Some concerns | Undetected | No concerns | Major concerns | No concerns   | Major concerns | Low |
| PE:PE+PC      | 0 | Some concerns | Undetected | No concerns | Some concerns  | Some concerns | Major concerns | Low |
| PE:UC         | 0 | Some concerns | Undetected | No concerns | Some concerns  | Some concerns | Major concerns | Low |
| PE+PC:UC      | 0 | Some concerns | Undetected | No concerns | Some concerns  | No concerns   | Major concerns | Low |

Adv: advice, BT: behavioural therapy, CBT: cognitive behavioural therapy, CBT+PC: cognitive behavioural therapy delivered with physiotherapy care, CP: combined psychological approaches, CP+PC: combined psychological approaches delivered with physiotherapy care, GP: general practitioner care, Mind+PC: mindfulness delivered with physiotherapy care, NI: no intervention, PC: physiotherapy care, PE: pain education, PE+PC: pain education delivered with physiotherapy care, UC: usual care.

**Supplementary Table 12.3** Physical function at mid-term treatment sustainability

| Comparison   | n studies | Within-study bias | Reporting bias | Indirectness | Imprecision   | Heterogeneity  | Incoherence    | Confidence rating |
|--------------|-----------|-------------------|----------------|--------------|---------------|----------------|----------------|-------------------|
| Adv:CBT      | 1         | Some concerns     | Undetected     | No concerns  | No concerns   | Some concerns  | No concerns    | Moderate          |
| Adv:CBT+PC   | 1         | Some concerns     | Undetected     | No concerns  | Some concerns | No concerns    | No concerns    | Moderate          |
| Adv:Mind     | 1         | Some concerns     | Undetected     | No concerns  | No concerns   | Some concerns  | No concerns    | Moderate          |
| BT:CBT       | 1         | Some concerns     | Undetected     | No concerns  | Some concerns | No concerns    | Major concerns | Moderate          |
| CBT:CBT+PC   | 1         | Some concerns     | Undetected     | No concerns  | No concerns   | Some concerns  | Major concerns | Moderate          |
| CBT:GP       | 1         | Some concerns     | Undetected     | No concerns  | Some concerns | No concerns    | No concerns    | Moderate          |
| CBT:Mind     | 1         | Some concerns     | Undetected     | No concerns  | No concerns   | Major concerns | No concerns    | Moderate          |
| CBT:NI       | 1         | No concerns       | Undetected     | No concerns  | Some concerns | No concerns    | Major concerns | Moderate          |
| CBT:PC       | 1         | Some concerns     | Undetected     | No concerns  | Some concerns | No concerns    | No concerns    | Moderate          |
| CBT:UC       | 1         | Some concerns     | Undetected     | No concerns  | Some concerns | No concerns    | No concerns    | Moderate          |
| CBT+PC:CP+PC | 1         | Some concerns     | Undetected     | No concerns  | No concerns   | Some concerns  | Major concerns | Moderate          |
| CBT+PC:PC    | 5         | Some concerns     | Undetected     | No concerns  | No concerns   | Some concerns  | Some concerns  | Moderate          |
| CP:CP+PC     | 1         | Some concerns     | Undetected     | No concerns  | No concerns   | Some concerns  | No concerns    | Moderate          |

|             |   |               |            |             |                |                |                |          |
|-------------|---|---------------|------------|-------------|----------------|----------------|----------------|----------|
| CP:CP+PC    | 1 | Some concerns | Undetected | No concerns | Some concerns  | No concerns    | Major concerns | Moderate |
| CP:GP       | 2 | Some concerns | Undetected | No concerns | No concerns    | Some concerns  | No concerns    | Moderate |
| CP:UC       | 3 | Some concerns | Undetected | No concerns | No concerns    | Some concerns  | No concerns    | Moderate |
| CP+PC:PE    | 1 | Some concerns | Undetected | No concerns | No concerns    | Major concerns | Major concerns | Moderate |
| CP+PC:PC    | 2 | Some concerns | Undetected | No concerns | No concerns    | Some concerns  | No concerns    | Moderate |
| Csl:NI      | 1 | Some concerns | Undetected | No concerns | Some concerns  | No concerns    | Major concerns | Moderate |
| Mind:UC     | 1 | Some concerns | Undetected | No concerns | Some concerns  | No concerns    | No concerns    | Moderate |
| Mind+PC:PC  | 2 | Some concerns | Undetected | No concerns | No concerns    | Major concerns | Major concerns | Moderate |
| PE:PE+PC    | 1 | Some concerns | Undetected | No concerns | Some concerns  | No concerns    | Major concerns | Moderate |
| PE:PC       | 1 | Some concerns | Undetected | No concerns | Some concerns  | No concerns    | Major concerns | Moderate |
| Adv:BT      | 0 | Some concerns | Undetected | No concerns | Some concerns  | Some concerns  | Major concerns | Low      |
| Adv:CP      | 0 | Some concerns | Undetected | No concerns | Some concerns  | No concerns    | Major concerns | Low      |
| Adv:CP+PC   | 0 | Some concerns | Undetected | No concerns | Some concerns  | No concerns    | Major concerns | Low      |
| Adv:Csl     | 0 | Some concerns | Undetected | No concerns | Major concerns | No concerns    | Major concerns | Low      |
| Adv:GP      | 0 | Some concerns | Undetected | No concerns | Some concerns  | No concerns    | Major concerns | Low      |
| Adv:Mind+PC | 0 | Some concerns | Undetected | No concerns | Some concerns  | Some concerns  | Major concerns | Low      |
| Adv:NI      | 0 | Some concerns | Undetected | No concerns | Some concerns  | Some concerns  | Major concerns | Low      |
| Adv:PE      | 0 | Some concerns | Undetected | No concerns | Some concerns  | No concerns    | Major concerns | Low      |
| Adv:PE+PC   | 0 | Some concerns | Undetected | No concerns | Some concerns  | No concerns    | Major concerns | Low      |
| Adv:PC      | 0 | Some concerns | Undetected | No concerns | Some concerns  | No concerns    | Major concerns | Low      |
| Adv:UC      | 0 | Some concerns | Undetected | No concerns | Some concerns  | No concerns    | Major concerns | Low      |
| BT:CBT+PC   | 0 | Some concerns | Undetected | No concerns | Some concerns  | No concerns    | Major concerns | Low      |
| BT:CP       | 0 | Some concerns | Undetected | No concerns | Some concerns  | No concerns    | Major concerns | Low      |
| BT:CP+PC    | 0 | Some concerns | Undetected | No concerns | Some concerns  | No concerns    | Major concerns | Low      |
| BT:CP+PC    | 0 | Some concerns | Undetected | No concerns | No concerns    | Some concerns  | Major concerns | Low      |
| BT:Csl      | 0 | Some concerns | Undetected | No concerns | Some concerns  | Some concerns  | Major concerns | Low      |
| BT:GP       | 0 | Some concerns | Undetected | No concerns | Major concerns | No concerns    | Major concerns | Low      |
| BT:Mind     | 0 | Some concerns | Undetected | No concerns | Some concerns  | No concerns    | Major concerns | Low      |
| BT:Mind+PC  | 0 | Some concerns | Undetected | No concerns | Major concerns | No concerns    | Major concerns | Low      |



|               |   |               |            |             |                |                |                |          |
|---------------|---|---------------|------------|-------------|----------------|----------------|----------------|----------|
| CP+PC:Csl     | 0 | Some concerns | Undetected | No concerns | Major concerns | No concerns    | Major concerns | Low      |
| CP+PC:GP      | 0 | Some concerns | Undetected | No concerns | No concerns    | Some concerns  | Major concerns | Low      |
| CP+PC:Mind    | 0 | Some concerns | Undetected | No concerns | Some concerns  | No concerns    | Major concerns | Low      |
| CP+PC:Mind+PC | 0 | Some concerns | Undetected | No concerns | Some concerns  | No concerns    | Major concerns | Low      |
| CP+PC:NI      | 0 | Some concerns | Undetected | No concerns | Some concerns  | No concerns    | Major concerns | Low      |
| CP+PC:PE+PC   | 0 | Some concerns | Undetected | No concerns | Some concerns  | Some concerns  | Major concerns | Low      |
| CP+PC:UC      | 0 | Some concerns | Undetected | No concerns | No concerns    | Some concerns  | Major concerns | Low      |
| CP+PC:Csl     | 0 | Some concerns | Undetected | No concerns | Some concerns  | No concerns    | Major concerns | Low      |
| CP+PC:GP      | 0 | Some concerns | Undetected | No concerns | No concerns    | No concerns    | Major concerns | Moderate |
| CP+PC:Mind    | 0 | Some concerns | Undetected | No concerns | Some concerns  | No concerns    | Major concerns | Low      |
| CP+PC:Mind+PC | 0 | Some concerns | Undetected | No concerns | Some concerns  | No concerns    | Major concerns | Low      |
| CP+PC:NI      | 0 | Some concerns | Undetected | No concerns | No concerns    | Some concerns  | Major concerns | Low      |
| CP+PC:PE      | 0 | Some concerns | Undetected | No concerns | Some concerns  | No concerns    | Major concerns | Low      |
| CP+PC:PE+PC   | 0 | Some concerns | Undetected | No concerns | Major concerns | No concerns    | Major concerns | Low      |
| CP+PC:PC      | 0 | Some concerns | Undetected | No concerns | No concerns    | Some concerns  | Major concerns | Low      |
| CP+PC:UC      | 0 | Some concerns | Undetected | No concerns | No concerns    | No concerns    | Major concerns | Moderate |
| Csl:GP        | 0 | Some concerns | Undetected | No concerns | Some concerns  | Some concerns  | Major concerns | Low      |
| Csl:Mind      | 0 | Some concerns | Undetected | No concerns | Major concerns | No concerns    | Major concerns | Low      |
| Csl:Mind+PC   | 0 | Some concerns | Undetected | No concerns | Major concerns | No concerns    | Major concerns | Low      |
| Csl:PE        | 0 | Some concerns | Undetected | No concerns | Major concerns | No concerns    | Major concerns | Low      |
| Csl:PE+PC     | 0 | Some concerns | Undetected | No concerns | Some concerns  | Some concerns  | Major concerns | Low      |
| Csl:PC        | 0 | Some concerns | Undetected | No concerns | Major concerns | No concerns    | Major concerns | Low      |
| Csl:UC        | 0 | Some concerns | Undetected | No concerns | Some concerns  | Some concerns  | Major concerns | Low      |
| GP:Mind       | 0 | Some concerns | Undetected | No concerns | Some concerns  | No concerns    | Major concerns | Low      |
| GP:Mind+PC    | 0 | Some concerns | Undetected | No concerns | Major concerns | No concerns    | Major concerns | Low      |
| GP:NI         | 0 | Some concerns | Undetected | No concerns | Some concerns  | Some concerns  | Major concerns | Low      |
| GP:PE         | 0 | Some concerns | Undetected | No concerns | Some concerns  | No concerns    | Major concerns | Low      |
| GP:PE+PC      | 0 | Some concerns | Undetected | No concerns | Some concerns  | No concerns    | Major concerns | Low      |
| GP:PC         | 0 | Some concerns | Undetected | No concerns | No concerns    | Major concerns | Major concerns | Low      |
| GP:UC         | 0 | Some concerns | Undetected | No concerns | No concerns    | Major concerns | Major concerns | Low      |

|               |   |               |            |             |                |                |                |     |
|---------------|---|---------------|------------|-------------|----------------|----------------|----------------|-----|
| Mind:Mind+PC  | 0 | Some concerns | Undetected | No concerns | Some concerns  | No concerns    | Major concerns | Low |
| Mind:NI       | 0 | Some concerns | Undetected | No concerns | Some concerns  | No concerns    | Major concerns | Low |
| Mind:PE       | 0 | Some concerns | Undetected | No concerns | Some concerns  | Some concerns  | Major concerns | Low |
| Mind:PE+PC    | 0 | Some concerns | Undetected | No concerns | Some concerns  | Some concerns  | Major concerns | Low |
| Mind:PC       | 0 | Some concerns | Undetected | No concerns | Some concerns  | No concerns    | Major concerns | Low |
| Mind+PC:NI    | 0 | Some concerns | Undetected | No concerns | Major concerns | No concerns    | Major concerns | Low |
| Mind+PC:PE    | 0 | Some concerns | Undetected | No concerns | Some concerns  | No concerns    | Major concerns | Low |
| Mind+PC:PE+PC | 0 | Some concerns | Undetected | No concerns | Some concerns  | No concerns    | Major concerns | Low |
| Mind+PC:UC    | 0 | Some concerns | Undetected | No concerns | Major concerns | No concerns    | Major concerns | Low |
| NI:PE         | 0 | Some concerns | Undetected | No concerns | Some concerns  | No concerns    | Major concerns | Low |
| NI:PE+PC      | 0 | Some concerns | Undetected | No concerns | Some concerns  | No concerns    | Major concerns | Low |
| NI:PC         | 0 | Some concerns | Undetected | No concerns | Major concerns | No concerns    | Major concerns | Low |
| NI:UC         | 0 | Some concerns | Undetected | No concerns | Some concerns  | Some concerns  | Major concerns | Low |
| PE:UC         | 0 | Some concerns | Undetected | No concerns | Some concerns  | No concerns    | Major concerns | Low |
| PE+PC:PC      | 0 | Some concerns | Undetected | No concerns | Some concerns  | No concerns    | Major concerns | Low |
| PE+PC:UC      | 0 | Some concerns | Undetected | No concerns | Some concerns  | No concerns    | Major concerns | Low |
| PC:UC         | 0 | Some concerns | Undetected | No concerns | No concerns    | Major concerns | Major concerns | Low |

Adv: advice, BT: behavioural therapy, CBT: cognitive behavioural therapy, CBT+PC: cognitive behavioural therapy delivered with physiotherapy care, CP: combined psychological approaches, CP+PC: combined psychological approaches delivered with physiotherapy care, Csl: counselling, GP: general practitioner care, Mind: mindfulness, Mind+PC: mindfulness delivered with physiotherapy care, NI: no intervention, PC: physiotherapy care, PE: pain education, PE+PC: pain education delivered with physiotherapy care, UC: usual care.

**Supplementary Table 12.4** Physical function at long-term treatment sustainability

| Comparison | n studies | Within-study bias | Reporting bias | Indirectness | Imprecision    | Heterogeneity  | Incoherence | Confidence rating |
|------------|-----------|-------------------|----------------|--------------|----------------|----------------|-------------|-------------------|
| CBT:CBT+PC | 1         | Some concerns     | Undetected     | No concerns  | Major concerns | No concerns    | No concerns | Moderate          |
| CBT:GP     | 1         | Some concerns     | Undetected     | No concerns  | Major concerns | No concerns    | No concerns | Moderate          |
| CBT:PC     | 1         | Some concerns     | Undetected     | No concerns  | Major concerns | No concerns    | No concerns | Moderate          |
| CBT+PC:PC  | 5         | Some concerns     | Undetected     | No concerns  | No concerns    | Major concerns | No concerns | Moderate          |
| CP+PC:PC   | 1         | Some concerns     | Undetected     | No concerns  | Major concerns | No concerns    | No concerns | Moderate          |



|        |   |               |            |             |                |             |             |          |
|--------|---|---------------|------------|-------------|----------------|-------------|-------------|----------|
| Csl:UC | 0 | Some concerns | Undetected | No concerns | Major concerns | No concerns | No concerns | Moderate |
| GP:NI  | 0 | Some concerns | Undetected | No concerns | Major concerns | No concerns | No concerns | Moderate |
| GP:PE  | 0 | Some concerns | Undetected | No concerns | Major concerns | No concerns | No concerns | Moderate |
| GP:PC  | 0 | Some concerns | Undetected | No concerns | Major concerns | No concerns | No concerns | Moderate |
| GP:UC  | 0 | Some concerns | Undetected | No concerns | Major concerns | No concerns | No concerns | Moderate |
| NI:PE  | 0 | Some concerns | Undetected | No concerns | Major concerns | No concerns | No concerns | Moderate |
| NI:PC  | 0 | Some concerns | Undetected | No concerns | Major concerns | No concerns | No concerns | Moderate |
| NI:UC  | 0 | Some concerns | Undetected | No concerns | Major concerns | No concerns | No concerns | Moderate |
| PE:PC  | 0 | Some concerns | Undetected | No concerns | Major concerns | No concerns | No concerns | Moderate |
| PC:UC  | 0 | Some concerns | Undetected | No concerns | Major concerns | No concerns | No concerns | Moderate |

CBT: cognitive behavioural therapy, CBT+PC: cognitive behavioural therapy delivered with physiotherapy care, CP: combined psychological approaches, CP+PC: combined psychological approaches delivered with physiotherapy care, Csl: counselling, GP: general practitioner care, NI: no intervention, PC: physiotherapy care, PE: pain education, UC: usual care.

**Supplementary Table 12.5** Pain intensity at post-intervention

| Comparison   | n studies | Within-study bias | Reporting bias | Indirectness | Imprecision    | Heterogeneity | Incoherence    | Confidence rating |
|--------------|-----------|-------------------|----------------|--------------|----------------|---------------|----------------|-------------------|
| Adv:BT       | 1         | Some concerns     | Undetected     | No concerns  | Major concerns | No concerns   | No concerns    | Moderate          |
| Adv:CBT      | 1         | Some concerns     | Undetected     | No concerns  | Major concerns | No concerns   | No concerns    | Moderate          |
| Adv:Mind     | 1         | Some concerns     | Undetected     | No concerns  | Major concerns | No concerns   | No concerns    | Moderate          |
| BT:BT+PC     | 2         | Some concerns     | Undetected     | No concerns  | No concerns    | Some concerns | No concerns    | Moderate          |
| BT:CBT       | 5         | Some concerns     | Undetected     | No concerns  | Some concerns  | Some concerns | No concerns    | Moderate          |
| BT:NI        | 4         | Some concerns     | Undetected     | No concerns  | Some concerns  | Some concerns | No concerns    | Moderate          |
| BT:PC        | 3         | Some concerns     | Undetected     | No concerns  | Some concerns  | Some concerns | Major concerns | Low               |
| BT:UC        | 1         | Some concerns     | Undetected     | No concerns  | Major concerns | No concerns   | No concerns    | Moderate          |
| BT+PC:CBT+PC | 1         | Some concerns     | Undetected     | No concerns  | Major concerns | No concerns   | No concerns    | Moderate          |
| BT+PC:PC     | 3         | Some concerns     | Undetected     | No concerns  | No concerns    | Some concerns | No concerns    | Moderate          |
| CBT:CBT+PC   | 1         | Some concerns     | Undetected     | No concerns  | Some concerns  | Some concerns | No concerns    | Moderate          |
| CBT:GP       | 2         | Some concerns     | Undetected     | No concerns  | Some concerns  | Some concerns | No concerns    | Moderate          |
| CBT:Mind     | 1         | Some concerns     | Undetected     | No concerns  | Major concerns | No concerns   | No concerns    | Moderate          |



|              |   |                |            |             |                |                |                |          |
|--------------|---|----------------|------------|-------------|----------------|----------------|----------------|----------|
| CBT:NI       | 5 | Some concerns  | Undetected | No concerns | No concerns    | Major concerns | No concerns    | Moderate |
| CBT:PC       | 1 | Some concerns  | Undetected | No concerns | Some concerns  | Some concerns  | No concerns    | Moderate |
| CBT:UC       | 1 | Some concerns  | Undetected | No concerns | Some concerns  | Some concerns  | No concerns    | Moderate |
| CBT+PC:CP+PC | 1 | Some concerns  | Undetected | No concerns | No concerns    | Some concerns  | No concerns    | Moderate |
| CBT+PC:NI    | 1 | Some concerns  | Undetected | No concerns | No concerns    | Some concerns  | Major concerns | Low      |
| CBT+PC:PC    | 8 | Some concerns  | Undetected | No concerns | No concerns    | Some concerns  | No concerns    | Moderate |
| CBT+PC:PE+PC | 1 | Some concerns  | Undetected | No concerns | Some concerns  | Some concerns  | No concerns    | Moderate |
| CP:CP+PC     | 3 | Some concerns  | Undetected | No concerns | Some concerns  | Some concerns  | No concerns    | Moderate |
| CP:GP        | 1 | Some concerns  | Undetected | No concerns | Some concerns  | Some concerns  | No concerns    | Moderate |
| CP:NI        | 1 | Some concerns  | Undetected | No concerns | Some concerns  | Some concerns  | No concerns    | Moderate |
| CP:PE        | 1 | Some concerns  | Undetected | No concerns | Major concerns | No concerns    | No concerns    | Moderate |
| CP:UC        | 3 | Some concerns  | Undetected | No concerns | Some concerns  | Some concerns  | No concerns    | Moderate |
| CP+PC:PC     | 4 | Some concerns  | Undetected | No concerns | Some concerns  | Some concerns  | No concerns    | Moderate |
| Csl:UC       | 1 | Some concerns  | Undetected | No concerns | No concerns    | Some concerns  | No concerns    | Moderate |
| Csl+PC:PC    | 1 | Some concerns  | Undetected | No concerns | Major concerns | No concerns    | No concerns    | Moderate |
| Mind:NI      | 1 | Major concerns | Undetected | No concerns | Some concerns  | Some concerns  | No concerns    | Low      |
| Mind:UC      | 1 | Some concerns  | Undetected | No concerns | Some concerns  | Some concerns  | No concerns    | Moderate |
| Mind+PC:PC   | 3 | Some concerns  | Undetected | No concerns | Some concerns  | Some concerns  | No concerns    | Moderate |
| Mind+PC:PE   | 1 | Some concerns  | Undetected | No concerns | Major concerns | No concerns    | No concerns    | Moderate |
| PC:PE        | 2 | Some concerns  | Undetected | No concerns | Some concerns  | Some concerns  | No concerns    | Moderate |
| PC:PE+PC     | 8 | Some concerns  | Undetected | No concerns | No concerns    | Some concerns  | No concerns    | Moderate |
| PC:UC        | 1 | Some concerns  | Undetected | No concerns | Major concerns | No concerns    | No concerns    | Moderate |
| Adv:BT+PC    | 0 | Some concerns  | Undetected | No concerns | Some concerns  | Some concerns  | No concerns    | Moderate |
| Adv:CBT+PC   | 0 | Some concerns  | Undetected | No concerns | Some concerns  | Some concerns  | No concerns    | Moderate |
| Adv:CP       | 0 | Some concerns  | Undetected | No concerns | Major concerns | No concerns    | No concerns    | Moderate |
| Adv:CP+PC    | 0 | Some concerns  | Undetected | No concerns | Major concerns | No concerns    | No concerns    | Moderate |
| Adv:Csl      | 0 | Some concerns  | Undetected | No concerns | No concerns    | Some concerns  | No concerns    | Moderate |
| Adv:Csl+PC   | 0 | Some concerns  | Undetected | No concerns | Major concerns | No concerns    | No concerns    | Moderate |
| Adv:GP       | 0 | Some concerns  | Undetected | No concerns | Major concerns | No concerns    | No concerns    | Moderate |
| Adv:Mind+PC  | 0 | Some concerns  | Undetected | No concerns | Major concerns | No concerns    | No concerns    | Moderate |

|               |   |               |            |             |                |               |             |          |
|---------------|---|---------------|------------|-------------|----------------|---------------|-------------|----------|
| Adv:NI        | 0 | Some concerns | Undetected | No concerns | Some concerns  | Some concerns | No concerns | Moderate |
| Adv:PC        | 0 | Some concerns | Undetected | No concerns | Major concerns | No concerns   | No concerns | Moderate |
| Adv:PE        | 0 | Some concerns | Undetected | No concerns | Major concerns | No concerns   | No concerns | Moderate |
| Adv:PE+PC     | 0 | Some concerns | Undetected | No concerns | Some concerns  | Some concerns | No concerns | Moderate |
| Adv:UC        | 0 | Some concerns | Undetected | No concerns | Major concerns | No concerns   | No concerns | Moderate |
| BT:CBT+PC     | 0 | Some concerns | Undetected | No concerns | No concerns    | Some concerns | No concerns | Moderate |
| BT:CP         | 0 | Some concerns | Undetected | No concerns | Some concerns  | Some concerns | No concerns | Moderate |
| BT:CP+PC      | 0 | Some concerns | Undetected | No concerns | Major concerns | No concerns   | No concerns | Moderate |
| BT:Csl        | 0 | Some concerns | Undetected | No concerns | No concerns    | Some concerns | No concerns | Moderate |
| BT:Csl+PC     | 0 | Some concerns | Undetected | No concerns | Major concerns | No concerns   | No concerns | Moderate |
| BT:GP         | 0 | Some concerns | Undetected | No concerns | Major concerns | No concerns   | No concerns | Moderate |
| BT:Mind       | 0 | Some concerns | Undetected | No concerns | Some concerns  | Some concerns | No concerns | Moderate |
| BT:Mind+PC    | 0 | Some concerns | Undetected | No concerns | Some concerns  | Some concerns | No concerns | Moderate |
| BT:PE         | 0 | Some concerns | Undetected | No concerns | Major concerns | No concerns   | No concerns | Moderate |
| BT:PE+PC      | 0 | Some concerns | Undetected | No concerns | No concerns    | Some concerns | No concerns | Moderate |
| BT+PC:CBT     | 0 | Some concerns | Undetected | No concerns | Some concerns  | Some concerns | No concerns | Moderate |
| BT+PC:CP      | 0 | Some concerns | Undetected | No concerns | Some concerns  | Some concerns | No concerns | Moderate |
| BT+PC:CP+PC   | 0 | Some concerns | Undetected | No concerns | Some concerns  | Some concerns | No concerns | Moderate |
| BT+PC:Csl     | 0 | Some concerns | Undetected | No concerns | No concerns    | No concerns   | No concerns | High     |
| BT+PC:Csl+PC  | 0 | Some concerns | Undetected | No concerns | Major concerns | No concerns   | No concerns | Moderate |
| BT+PC:GP      | 0 | Some concerns | Undetected | No concerns | No concerns    | Some concerns | No concerns | Moderate |
| BT+PC:Mind    | 0 | Some concerns | Undetected | No concerns | Some concerns  | Some concerns | No concerns | Moderate |
| BT+PC:Mind+PC | 0 | Some concerns | Undetected | No concerns | Some concerns  | Some concerns | No concerns | Moderate |
| BT+PC:NI      | 0 | Some concerns | Undetected | No concerns | No concerns    | Some concerns | No concerns | Moderate |
| BT+PC:PE      | 0 | Some concerns | Undetected | No concerns | Some concerns  | Some concerns | No concerns | Moderate |
| BT+PC:PE+PC   | 0 | Some concerns | Undetected | No concerns | Major concerns | No concerns   | No concerns | Moderate |
| BT+PC:UC      | 0 | Some concerns | Undetected | No concerns | No concerns    | Some concerns | No concerns | Moderate |
| CBT:CP        | 0 | Some concerns | Undetected | No concerns | Some concerns  | Some concerns | No concerns | Moderate |
| CBT:CP+PC     | 0 | Some concerns | Undetected | No concerns | Some concerns  | Some concerns | No concerns | Moderate |
| CBT:Csl       | 0 | Some concerns | Undetected | No concerns | No concerns    | No concerns   | No concerns | High     |

|                |   |               |            |             |                |                |             |          |
|----------------|---|---------------|------------|-------------|----------------|----------------|-------------|----------|
| CBT:Csl+PC     | 0 | Some concerns | Undetected | No concerns | Major concerns | No concerns    | No concerns | Moderate |
| CBT:Mind+PC    | 0 | Some concerns | Undetected | No concerns | Major concerns | No concerns    | No concerns | Moderate |
| CBT:PE         | 0 | Some concerns | Undetected | No concerns | Major concerns | No concerns    | No concerns | Moderate |
| CBT:PE+PC      | 0 | Some concerns | Undetected | No concerns | Some concerns  | Some concerns  | No concerns | Moderate |
| CBT+PC:CP      | 0 | Some concerns | Undetected | No concerns | No concerns    | Major concerns | No concerns | Moderate |
| CBT+PC:Csl     | 0 | Some concerns | Undetected | No concerns | No concerns    | No concerns    | No concerns | High     |
| CBT+PC:Csl+PC  | 0 | Some concerns | Undetected | No concerns | Some concerns  | Some concerns  | No concerns | Moderate |
| CBT+PC:GP      | 0 | Some concerns | Undetected | No concerns | No concerns    | Some concerns  | No concerns | Moderate |
| CBT+PC:Mind    | 0 | Some concerns | Undetected | No concerns | Some concerns  | Some concerns  | No concerns | Moderate |
| CBT+PC:Mind+PC | 0 | Some concerns | Undetected | No concerns | Some concerns  | Some concerns  | No concerns | Moderate |
| CBT+PC:PE      | 0 | Some concerns | Undetected | No concerns | Some concerns  | Some concerns  | No concerns | Moderate |
| CBT+PC:UC      | 0 | Some concerns | Undetected | No concerns | No concerns    | Some concerns  | No concerns | Moderate |
| CP:Csl         | 0 | Some concerns | Undetected | No concerns | No concerns    | No concerns    | No concerns | High     |
| CP:Csl+PC      | 0 | Some concerns | Undetected | No concerns | Major concerns | No concerns    | No concerns | Moderate |
| CP:Mind        | 0 | Some concerns | Undetected | No concerns | Major concerns | No concerns    | No concerns | Moderate |
| CP:Mind+PC     | 0 | Some concerns | Undetected | No concerns | Major concerns | No concerns    | No concerns | Moderate |
| CP:PC          | 0 | Some concerns | Undetected | No concerns | Some concerns  | Some concerns  | No concerns | Moderate |
| CP:PE+PC       | 0 | Some concerns | Undetected | No concerns | Some concerns  | Some concerns  | No concerns | Moderate |
| CP+PC:Csl      | 0 | Some concerns | Undetected | No concerns | No concerns    | No concerns    | No concerns | High     |
| CP+PC:Csl+PC   | 0 | Some concerns | Undetected | No concerns | Major concerns | No concerns    | No concerns | Moderate |
| CP+PC:GP       | 0 | Some concerns | Undetected | No concerns | Some concerns  | Some concerns  | No concerns | Moderate |
| CP+PC:Mind     | 0 | Some concerns | Undetected | No concerns | Major concerns | No concerns    | No concerns | Moderate |
| CP+PC:Mind+PC  | 0 | Some concerns | Undetected | No concerns | Major concerns | No concerns    | No concerns | Moderate |
| CP+PC:NI       | 0 | Some concerns | Undetected | No concerns | Some concerns  | Some concerns  | No concerns | Moderate |
| CP+PC:PE       | 0 | Some concerns | Undetected | No concerns | Major concerns | No concerns    | No concerns | Moderate |
| CP+PC:PE+PC    | 0 | Some concerns | Undetected | No concerns | No concerns    | Major concerns | No concerns | Moderate |
| CP+PC:UC       | 0 | Some concerns | Undetected | No concerns | Some concerns  | Some concerns  | No concerns | Moderate |
| Csl:Csl+PC     | 0 | Some concerns | Undetected | No concerns | Some concerns  | No concerns    | No concerns | Moderate |
| Csl:GP         | 0 | Some concerns | Undetected | No concerns | Some concerns  | No concerns    | No concerns | Moderate |
| Csl:Mind       | 0 | Some concerns | Undetected | No concerns | No concerns    | No concerns    | No concerns | High     |

|                |   |               |            |             |                |               |             |          |
|----------------|---|---------------|------------|-------------|----------------|---------------|-------------|----------|
| Csl:Mind+PC    | 0 | Some concerns | Undetected | No concerns | No concerns    | No concerns   | No concerns | High     |
| Csl:NI         | 0 | Some concerns | Undetected | No concerns | No concerns    | Some concerns | No concerns | Moderate |
| Csl:PC         | 0 | Some concerns | Undetected | No concerns | No concerns    | Some concerns | No concerns | Moderate |
| Csl:PE         | 0 | Some concerns | Undetected | No concerns | No concerns    | No concerns   | No concerns | High     |
| Csl:PE+PC      | 0 | Some concerns | Undetected | No concerns | No concerns    | No concerns   | No concerns | High     |
| Csl+PC:GP      | 0 | Some concerns | Undetected | No concerns | Major concerns | No concerns   | No concerns | Moderate |
| Csl+PC:Mind    | 0 | Some concerns | Undetected | No concerns | Major concerns | No concerns   | No concerns | Moderate |
| Csl+PC:Mind+PC | 0 | Some concerns | Undetected | No concerns | Major concerns | No concerns   | No concerns | Moderate |
| Csl+PC:NI      | 0 | Some concerns | Undetected | No concerns | Major concerns | No concerns   | No concerns | Moderate |
| Csl+PC:PE      | 0 | Some concerns | Undetected | No concerns | Major concerns | No concerns   | No concerns | Moderate |
| Csl+PC:PE+PC   | 0 | Some concerns | Undetected | No concerns | Some concerns  | Some concerns | No concerns | Moderate |
| Csl+PC:UC      | 0 | Some concerns | Undetected | No concerns | Major concerns | No concerns   | No concerns | Moderate |
| GP:Mind        | 0 | Some concerns | Undetected | No concerns | Some concerns  | Some concerns | No concerns | Moderate |
| GP:Mind+PC     | 0 | Some concerns | Undetected | No concerns | Some concerns  | Some concerns | No concerns | Moderate |
| GP:NI          | 0 | Some concerns | Undetected | No concerns | Major concerns | No concerns   | No concerns | Moderate |
| GP:PC          | 0 | Some concerns | Undetected | No concerns | Major concerns | No concerns   | No concerns | Moderate |
| GP:PE          | 0 | Some concerns | Undetected | No concerns | Major concerns | No concerns   | No concerns | Moderate |
| GP:PE+PC       | 0 | Some concerns | Undetected | No concerns | No concerns    | Some concerns | No concerns | Moderate |
| GP:UC          | 0 | Some concerns | Undetected | No concerns | Major concerns | No concerns   | No concerns | Moderate |
| Mind:Mind+PC   | 0 | Some concerns | Undetected | No concerns | Major concerns | No concerns   | No concerns | Moderate |
| Mind:PC        | 0 | Some concerns | Undetected | No concerns | Some concerns  | Some concerns | No concerns | Moderate |
| Mind:PE        | 0 | Some concerns | Undetected | No concerns | Major concerns | No concerns   | No concerns | Moderate |
| Mind:PE+PC     | 0 | Some concerns | Undetected | No concerns | Some concerns  | Some concerns | No concerns | Moderate |
| Mind+PC:NI     | 0 | Some concerns | Undetected | No concerns | Some concerns  | Some concerns | No concerns | Moderate |
| Mind+PC:PE+PC  | 0 | Some concerns | Undetected | No concerns | Some concerns  | Some concerns | No concerns | Moderate |
| Mind+PC:UC     | 0 | Some concerns | Undetected | No concerns | Some concerns  | Some concerns | No concerns | Moderate |
| NI:PC          | 0 | Some concerns | Undetected | No concerns | Some concerns  | Some concerns | No concerns | Moderate |
| NI:PE          | 0 | Some concerns | Undetected | No concerns | Some concerns  | Some concerns | No concerns | Moderate |
| NI:PE+PC       | 0 | Some concerns | Undetected | No concerns | No concerns    | Some concerns | No concerns | Moderate |
| NI:UC          | 0 | Some concerns | Undetected | No concerns | Major concerns | No concerns   | No concerns | Moderate |

|          |   |               |            |             |                |               |             |          |
|----------|---|---------------|------------|-------------|----------------|---------------|-------------|----------|
| PE:PE+PC | 0 | Some concerns | Undetected | No concerns | Some concerns  | Some concerns | No concerns | Moderate |
| PE:UC    | 0 | Some concerns | Undetected | No concerns | Major concerns | No concerns   | No concerns | Moderate |
| PE+PC:UC | 0 | Some concerns | Undetected | No concerns | No concerns    | Some concerns | No concerns | Moderate |

Adv: advice, BT: behavioural therapy, BT+PC: behavioural therapy delivered with physiotherapy care, CBT: cognitive behavioural therapy, CBT+PC: cognitive behavioural therapy delivered with physiotherapy care, CP: combined psychological approaches, CP+PC: combined psychological approaches delivered with physiotherapy care, Csl: counselling, Csl+PC: counselling delivered with physiotherapy care, GP: general practitioner care, Mind: mindfulness, Mind+PC: mindfulness delivered with physiotherapy care, NI: no intervention, PC: physiotherapy care, PE: pain education, PE+PC: pain education delivered with physiotherapy care, UC: usual care. For pain intensity at post-intervention, CINeMA was unable to perform the GRADE assessment when studies with more than three arms were included in the network. This affected two studies, which had four treatment arms each: Shariat et al., 2019 (BT+PC, BT, PC, NI);[77] Turner et al., 1990 (BT+PC, BT, PC, NI).[90] In order to successfully perform the GRADE assessment via CINeMA, we excluded the NI arm from these two studies. Sensitivity analyses excluding alternative treatment arms and excluding the studies altogether did not result in any changes to the overall confidence ratings.

**Supplementary Table 12.6** Pain intensity at short-term treatment sustainability

| Comparison   | n studies | Within-study bias | Reporting bias | Indirectness | Imprecision    | Heterogeneity  | Incoherence    | Confidence rating |
|--------------|-----------|-------------------|----------------|--------------|----------------|----------------|----------------|-------------------|
| Adv:CBT      | 1         | Some concerns     | Undetected     | No concerns  | Some concerns  | Some concerns  | No concerns    | Moderate          |
| Adv:CBT+PC   | 1         | Some concerns     | Undetected     | No concerns  | Some concerns  | Some concerns  | No concerns    | Moderate          |
| Adv:CP       | 1         | Some concerns     | Undetected     | No concerns  | Major concerns | No concerns    | No concerns    | Moderate          |
| BT:BT+PC     | 1         | Some concerns     | Undetected     | No concerns  | No concerns    | Some concerns  | No concerns    | Moderate          |
| BT:CBT       | 2         | Some concerns     | Undetected     | No concerns  | Some concerns  | Some concerns  | Some concerns  | Moderate          |
| BT:PC        | 2         | Some concerns     | Undetected     | No concerns  | Major concerns | No concerns    | Major concerns | Low               |
| BT:UC        | 1         | Some concerns     | Undetected     | No concerns  | Major concerns | No concerns    | No concerns    | Moderate          |
| BT+PC:PC     | 1         | Some concerns     | Undetected     | No concerns  | No concerns    | Some concerns  | No concerns    | Moderate          |
| CBT:GP       | 1         | Some concerns     | Undetected     | No concerns  | Some concerns  | Some concerns  | Major concerns | Low               |
| CBT:NI       | 1         | Some concerns     | Undetected     | No concerns  | Some concerns  | Some concerns  | No concerns    | Moderate          |
| CBT+PC:CP+PC | 1         | Some concerns     | Undetected     | No concerns  | Some concerns  | Some concerns  | No concerns    | Moderate          |
| CBT+PC:PE+PC | 1         | Some concerns     | Undetected     | No concerns  | Some concerns  | Some concerns  | No concerns    | Moderate          |
| CBT+PC:PC    | 1         | Some concerns     | Undetected     | No concerns  | No concerns    | Major concerns | No concerns    | Moderate          |
| CP:CP+PC     | 1         | Some concerns     | Undetected     | No concerns  | Major concerns | No concerns    | No concerns    | Moderate          |
| CP:GP        | 2         | Some concerns     | Undetected     | No concerns  | Some concerns  | Some concerns  | Some concerns  | Low               |

|              |   |               |            |             |                |                |               |          |
|--------------|---|---------------|------------|-------------|----------------|----------------|---------------|----------|
| CP:NI        | 1 | Some concerns | Undetected | No concerns | Major concerns | No concerns    | No concerns   | Moderate |
| CP:PE        | 1 | Some concerns | Undetected | No concerns | Some concerns  | Some concerns  | Some concerns | Low      |
| CP:UC        | 3 | Some concerns | Undetected | No concerns | Major concerns | No concerns    | No concerns   | Moderate |
| CP+PC:PC     | 3 | Some concerns | Undetected | No concerns | Some concerns  | Some concerns  | No concerns   | Moderate |
| Mind+PC:PC   | 2 | Some concerns | Undetected | No concerns | Some concerns  | Some concerns  | No concerns   | Moderate |
| PE:PC        | 1 | Some concerns | Undetected | No concerns | Some concerns  | Some concerns  | Some concerns | Low      |
| PE+PC:PC     | 5 | Some concerns | Undetected | No concerns | No concerns    | Some concerns  | No concerns   | Moderate |
| PC:UC        | 1 | Some concerns | Undetected | No concerns | Major concerns | No concerns    | No concerns   | Moderate |
| Adv:BT       | 0 | Some concerns | Undetected | No concerns | Major concerns | No concerns    | No concerns   | Moderate |
| Adv:BT+PC    | 0 | Some concerns | Undetected | No concerns | No concerns    | Some concerns  | No concerns   | Moderate |
| Adv:CP+PC    | 0 | Some concerns | Undetected | No concerns | Major concerns | No concerns    | No concerns   | Moderate |
| Adv:GP       | 0 | Some concerns | Undetected | No concerns | Major concerns | No concerns    | No concerns   | Moderate |
| Adv:Mind+PC  | 0 | Some concerns | Undetected | No concerns | Major concerns | No concerns    | No concerns   | Moderate |
| Adv:NI       | 0 | Some concerns | Undetected | No concerns | Major concerns | No concerns    | No concerns   | Moderate |
| Adv:PE       | 0 | Some concerns | Undetected | No concerns | Major concerns | No concerns    | No concerns   | Moderate |
| Adv:PE+PC    | 0 | Some concerns | Undetected | No concerns | Some concerns  | Major concerns | No concerns   | Moderate |
| Adv:PC       | 0 | Some concerns | Undetected | No concerns | Major concerns | No concerns    | No concerns   | Moderate |
| Adv:UC       | 0 | Some concerns | Undetected | No concerns | Major concerns | No concerns    | No concerns   | Moderate |
| BT:CBT+PC    | 0 | Some concerns | Undetected | No concerns | Some concerns  | Some concerns  | No concerns   | Moderate |
| BT:CP        | 0 | Some concerns | Undetected | No concerns | Major concerns | No concerns    | No concerns   | Moderate |
| BT:CP+PC     | 0 | Some concerns | Undetected | No concerns | Major concerns | No concerns    | No concerns   | Moderate |
| BT:GP        | 0 | Some concerns | Undetected | No concerns | Major concerns | No concerns    | No concerns   | Moderate |
| BT:Mind+PC   | 0 | Some concerns | Undetected | No concerns | Major concerns | No concerns    | No concerns   | Moderate |
| BT:NI        | 0 | Some concerns | Undetected | No concerns | Major concerns | No concerns    | No concerns   | Moderate |
| BT:PE        | 0 | Some concerns | Undetected | No concerns | Some concerns  | Some concerns  | No concerns   | Moderate |
| BT:PE+PC     | 0 | Some concerns | Undetected | No concerns | No concerns    | Some concerns  | No concerns   | Moderate |
| BT+PC:CBT    | 0 | Some concerns | Undetected | No concerns | Some concerns  | Some concerns  | No concerns   | Moderate |
| BT+PC:CBT+PC | 0 | Some concerns | Undetected | No concerns | Some concerns  | Some concerns  | No concerns   | Moderate |
| BT+PC:CP     | 0 | Some concerns | Undetected | No concerns | No concerns    | Some concerns  | No concerns   | Moderate |
| BT+PC:CP+PC  | 0 | Some concerns | Undetected | No concerns | No concerns    | Some concerns  | No concerns   | Moderate |



|               |   |               |            |             |                |               |             |          |
|---------------|---|---------------|------------|-------------|----------------|---------------|-------------|----------|
| GP:NI         | 0 | Some concerns | Undetected | No concerns | Major concerns | No concerns   | No concerns | Moderate |
| GP:PE         | 0 | Some concerns | Undetected | No concerns | Some concerns  | Some concerns | No concerns | Moderate |
| GP:PE+PC      | 0 | Some concerns | Undetected | No concerns | No concerns    | Some concerns | No concerns | Moderate |
| GP:PC         | 0 | Some concerns | Undetected | No concerns | Major concerns | No concerns   | No concerns | Moderate |
| GP:UC         | 0 | Some concerns | Undetected | No concerns | Major concerns | No concerns   | No concerns | Moderate |
| Mind+PC:NI    | 0 | Some concerns | Undetected | No concerns | Major concerns | No concerns   | No concerns | Moderate |
| Mind+PC:PE    | 0 | Some concerns | Undetected | No concerns | Major concerns | No concerns   | No concerns | Moderate |
| Mind+PC:PE+PC | 0 | Some concerns | Undetected | No concerns | Some concerns  | Some concerns | No concerns | Moderate |
| Mind+PC:UC    | 0 | Some concerns | Undetected | No concerns | Major concerns | No concerns   | No concerns | Moderate |
| NI:PE         | 0 | Some concerns | Undetected | No concerns | Major concerns | No concerns   | No concerns | Moderate |
| NI:PE+PC      | 0 | Some concerns | Undetected | No concerns | Some concerns  | Some concerns | No concerns | Moderate |
| NI:PC         | 0 | Some concerns | Undetected | No concerns | Major concerns | No concerns   | No concerns | Moderate |
| NI:UC         | 0 | Some concerns | Undetected | No concerns | Major concerns | No concerns   | No concerns | Moderate |
| PE:PE+PC      | 0 | Some concerns | Undetected | No concerns | Major concerns | No concerns   | No concerns | Moderate |
| PE:UC         | 0 | Some concerns | Undetected | No concerns | Some concerns  | Some concerns | No concerns | Moderate |
| PE+PC:UC      | 0 | Some concerns | Undetected | No concerns | No concerns    | Some concerns | No concerns | Moderate |

Adv: advice, BT: behavioural therapy, BT+PC: behavioural therapy delivered with physiotherapy care, CBT: cognitive behavioural therapy, CBT+PC: cognitive behavioural therapy delivered with physiotherapy care, CP: combined psychological approaches, CP+PC: combined psychological approaches delivered with physiotherapy care, GP: general practitioner care, Mind+PC: mindfulness delivered with physiotherapy care, NI: no intervention, PC: physiotherapy care, PE: pain education, PE+PC: pain education delivered with physiotherapy care, UC: usual care. For pain intensity at post-intervention, CINeMA was unable to perform the GRADE assessment when studies with more than three arms were included in the network. This affected two studies, which had four treatment arms each: Shariat et al., 2019 (BT+PC, BT, PC, NI);[77] Turner et al., 1990 (BT+PC, BT, PC, NI).[90] In order to successfully perform the GRADE assessment via CINeMA, we excluded the NI arm from these two studies. Sensitivity analyses excluding alternative treatment arms and excluding the studies altogether did not result in any changes to the overall confidence ratings.



**Supplementary Table 12.7** Pain intensity at mid-term treatment sustainability

| <b>Comparison</b> | <b>n studies</b> | <b>Within-study bias</b> | <b>Reporting bias</b> | <b>Indirectness</b> | <b>Imprecision</b> | <b>Heterogeneity</b> | <b>Incoherence</b> | <b>Confidence rating</b> |
|-------------------|------------------|--------------------------|-----------------------|---------------------|--------------------|----------------------|--------------------|--------------------------|
| Adv:CBT           | 1                | Some concerns            | Undetected            | No concerns         | Some concerns      | No concerns          | No concerns        | Moderate                 |
| Adv:CBT+PC        | 1                | Some concerns            | Undetected            | No concerns         | Some concerns      | No concerns          | No concerns        | Moderate                 |
| Adv:Mind          | 1                | Some concerns            | Undetected            | No concerns         | Some concerns      | No concerns          | No concerns        | Moderate                 |
| BT:BT+PC          | 1                | Some concerns            | Undetected            | No concerns         | No concerns        | Some concerns        | No concerns        | Moderate                 |
| BT:CBT            | 3                | Some concerns            | Undetected            | No concerns         | No concerns        | Major concerns       | No concerns        | Moderate                 |
| BT:PC             | 1                | Some concerns            | Undetected            | No concerns         | Some concerns      | Some concerns        | No concerns        | Moderate                 |
| BT+PC:CBT+PC      | 1                | Some concerns            | Undetected            | No concerns         | No concerns        | Some concerns        | No concerns        | Moderate                 |
| BT+PC:PC          | 2                | Some concerns            | Undetected            | No concerns         | No concerns        | No concerns          | No concerns        | High                     |
| CBT:CBT+PC        | 1                | Some concerns            | Undetected            | No concerns         | No concerns        | Major concerns       | No concerns        | Moderate                 |
| CBT:GP            | 1                | Some concerns            | Undetected            | No concerns         | No concerns        | Major concerns       | No concerns        | Moderate                 |
| CBT:Mind          | 1                | Some concerns            | Undetected            | No concerns         | No concerns        | Major concerns       | No concerns        | Moderate                 |
| CBT:NI            | 1                | Some concerns            | Undetected            | No concerns         | Some concerns      | Some concerns        | No concerns        | Moderate                 |
| CBT:PC            | 1                | Some concerns            | Undetected            | No concerns         | Some concerns      | Some concerns        | No concerns        | Moderate                 |
| CBT:UC            | 1                | Some concerns            | Undetected            | No concerns         | Some concerns      | No concerns          | No concerns        | Moderate                 |
| CBT+PC:CP+PC      | 1                | Some concerns            | Undetected            | No concerns         | Some concerns      | Some concerns        | No concerns        | Moderate                 |
| CBT+PC:PC         | 5                | Some concerns            | Undetected            | No concerns         | Some concerns      | No concerns          | No concerns        | Moderate                 |
| CP:CP+PC          | 1                | Some concerns            | Undetected            | No concerns         | Some concerns      | Some concerns        | No concerns        | Moderate                 |
| CP:GP             | 2                | Some concerns            | Undetected            | No concerns         | Some concerns      | Some concerns        | No concerns        | Moderate                 |
| CP:UC             | 3                | Some concerns            | Undetected            | No concerns         | No concerns        | Major concerns       | No concerns        | Moderate                 |
| CP+PC:PC          | 2                | Some concerns            | Undetected            | No concerns         | No concerns        | Major concerns       | No concerns        | Moderate                 |
| Csl:NI            | 1                | Some concerns            | Undetected            | No concerns         | Some concerns      | Some concerns        | No concerns        | Moderate                 |
| Mind:UC           | 1                | No concerns              | Undetected            | No concerns         | Some concerns      | Some concerns        | No concerns        | Moderate                 |
| Mind+PC:PC        | 2                | Some concerns            | Undetected            | No concerns         | Some concerns      | Some concerns        | No concerns        | Moderate                 |
| PE:PE+PC          | 1                | Some concerns            | Undetected            | No concerns         | Some concerns      | Some concerns        | Some concerns      | Low                      |
| PE:PC             | 1                | Some concerns            | Undetected            | No concerns         | No concerns        | Some concerns        | Major concerns     | Low                      |
| PE+PC:PC          | 1                | Some concerns            | Undetected            | No concerns         | Some concerns      | No concerns          | Some concerns      | Moderate                 |
| Adv:BT            | 0                | Some concerns            | Undetected            | No concerns         | Some concerns      | No concerns          | No concerns        | Moderate                 |

|               |   |               |            |             |                |               |             |          |
|---------------|---|---------------|------------|-------------|----------------|---------------|-------------|----------|
| Adv:BT+PC     | 0 | Some concerns | Undetected | No concerns | No concerns    | No concerns   | No concerns | High     |
| Adv:CP        | 0 | Some concerns | Undetected | No concerns | Some concerns  | Some concerns | No concerns | Moderate |
| Adv:CP+PC     | 0 | Some concerns | Undetected | No concerns | Some concerns  | Some concerns | No concerns | Moderate |
| Adv:Csl       | 0 | Some concerns | Undetected | No concerns | Major concerns | No concerns   | No concerns | Moderate |
| Adv:GP        | 0 | Some concerns | Undetected | No concerns | Some concerns  | Some concerns | No concerns | Moderate |
| Adv:Mind+PC   | 0 | Some concerns | Undetected | No concerns | Major concerns | No concerns   | No concerns | Moderate |
| Adv:NI        | 0 | Some concerns | Undetected | No concerns | Major concerns | No concerns   | No concerns | Moderate |
| Adv:PE        | 0 | Some concerns | Undetected | No concerns | No concerns    | Some concerns | No concerns | Moderate |
| Adv:PE+PC     | 0 | Some concerns | Undetected | No concerns | Some concerns  | No concerns   | No concerns | Moderate |
| Adv:PC        | 0 | Some concerns | Undetected | No concerns | Some concerns  | Some concerns | No concerns | Moderate |
| Adv:UC        | 0 | Some concerns | Undetected | No concerns | Major concerns | No concerns   | No concerns | Moderate |
| BT:CBT+PC     | 0 | Some concerns | Undetected | No concerns | Some concerns  | Some concerns | No concerns | Moderate |
| BT:CP         | 0 | Some concerns | Undetected | No concerns | Some concerns  | Some concerns | No concerns | Moderate |
| BT:CP+PC      | 0 | Some concerns | Undetected | No concerns | Some concerns  | Some concerns | No concerns | Moderate |
| BT:Csl        | 0 | Some concerns | Undetected | No concerns | Major concerns | No concerns   | No concerns | Moderate |
| BT:GP         | 0 | Some concerns | Undetected | No concerns | Major concerns | No concerns   | No concerns | Moderate |
| BT:Mind       | 0 | Some concerns | Undetected | No concerns | Major concerns | No concerns   | No concerns | Moderate |
| BT:Mind+PC    | 0 | Some concerns | Undetected | No concerns | Some concerns  | Some concerns | No concerns | Moderate |
| BT:NI         | 0 | Some concerns | Undetected | No concerns | Some concerns  | Some concerns | No concerns | Moderate |
| BT:PE         | 0 | Some concerns | Undetected | No concerns | Some concerns  | Some concerns | No concerns | Moderate |
| BT:PE+PC      | 0 | Some concerns | Undetected | No concerns | Major concerns | No concerns   | No concerns | Moderate |
| BT:UC         | 0 | Some concerns | Undetected | No concerns | Some concerns  | No concerns   | No concerns | Moderate |
| BT+PC:CBT     | 0 | Some concerns | Undetected | No concerns | No concerns    | Some concerns | No concerns | Moderate |
| BT+PC:CP      | 0 | Some concerns | Undetected | No concerns | No concerns    | Some concerns | No concerns | Moderate |
| BT+PC:CP+PC   | 0 | Some concerns | Undetected | No concerns | No concerns    | Some concerns | No concerns | Moderate |
| BT+PC:Csl     | 0 | Some concerns | Undetected | No concerns | Some concerns  | No concerns   | No concerns | Moderate |
| BT+PC:GP      | 0 | Some concerns | Undetected | No concerns | Some concerns  | No concerns   | No concerns | Moderate |
| BT+PC:Mind    | 0 | Some concerns | Undetected | No concerns | Some concerns  | No concerns   | No concerns | Moderate |
| BT+PC:Mind+PC | 0 | Some concerns | Undetected | No concerns | No concerns    | No concerns   | No concerns | High     |
| BT+PC:NI      | 0 | Some concerns | Undetected | No concerns | No concerns    | Some concerns | No concerns | Moderate |

|                |   |               |            |             |                |               |             |          |
|----------------|---|---------------|------------|-------------|----------------|---------------|-------------|----------|
| BT+PC:PE       | 0 | Some concerns | Undetected | No concerns | Major concerns | No concerns   | No concerns | Moderate |
| BT+PC:PE+PC    | 0 | Some concerns | Undetected | No concerns | Some concerns  | No concerns   | No concerns | Moderate |
| BT+PC:UC       | 0 | Some concerns | Undetected | No concerns | No concerns    | No concerns   | No concerns | High     |
| CBT:CP         | 0 | Some concerns | Undetected | No concerns | Some concerns  | Some concerns | No concerns | Moderate |
| CBT:CP+PC      | 0 | Some concerns | Undetected | No concerns | Some concerns  | Some concerns | No concerns | Moderate |
| CBT:Csl        | 0 | Some concerns | Undetected | No concerns | Major concerns | No concerns   | No concerns | Moderate |
| CBT:Mind+PC    | 0 | Some concerns | Undetected | No concerns | Some concerns  | Some concerns | No concerns | Moderate |
| CBT:PE         | 0 | Some concerns | Undetected | No concerns | Some concerns  | No concerns   | No concerns | Moderate |
| CBT:PE+PC      | 0 | Some concerns | Undetected | No concerns | Some concerns  | Some concerns | No concerns | Moderate |
| CBT+PC:CP      | 0 | Some concerns | Undetected | No concerns | Some concerns  | Some concerns | No concerns | Moderate |
| CBT+PC:Csl     | 0 | Some concerns | Undetected | No concerns | Major concerns | No concerns   | No concerns | Moderate |
| CBT+PC:GP      | 0 | Some concerns | Undetected | No concerns | Major concerns | No concerns   | No concerns | Moderate |
| CBT+PC:Mind    | 0 | Some concerns | Undetected | No concerns | Some concerns  | Some concerns | No concerns | Moderate |
| CBT+PC:Mind+PC | 0 | Some concerns | Undetected | No concerns | Some concerns  | No concerns   | No concerns | Moderate |
| CBT+PC:NI      | 0 | Some concerns | Undetected | No concerns | Some concerns  | Some concerns | No concerns | Moderate |
| CBT+PC:PE      | 0 | Some concerns | Undetected | No concerns | Some concerns  | No concerns   | No concerns | Moderate |
| CBT+PC:PE+PC   | 0 | Some concerns | Undetected | No concerns | Some concerns  | Some concerns | No concerns | Moderate |
| CBT+PC:UC      | 0 | Some concerns | Undetected | No concerns | Some concerns  | No concerns   | No concerns | Moderate |
| CP:Csl         | 0 | Some concerns | Undetected | No concerns | Major concerns | No concerns   | No concerns | Moderate |
| CP:Mind        | 0 | Some concerns | Undetected | No concerns | Some concerns  | Some concerns | No concerns | Moderate |
| CP:Mind+PC     | 0 | Some concerns | Undetected | No concerns | Major concerns | No concerns   | No concerns | Moderate |
| CP:NI          | 0 | Some concerns | Undetected | No concerns | Major concerns | No concerns   | No concerns | Moderate |
| CP:PE          | 0 | Some concerns | Undetected | No concerns | Some concerns  | No concerns   | No concerns | Moderate |
| CP:PE+PC       | 0 | Some concerns | Undetected | No concerns | Some concerns  | Some concerns | No concerns | Moderate |
| CP:PC          | 0 | Some concerns | Undetected | No concerns | Some concerns  | Some concerns | No concerns | Moderate |
| CP+PC:Csl      | 0 | Some concerns | Undetected | No concerns | Major concerns | No concerns   | No concerns | Moderate |
| CP+PC:GP       | 0 | Some concerns | Undetected | No concerns | Some concerns  | Some concerns | No concerns | Moderate |
| CP+PC:Mind     | 0 | Some concerns | Undetected | No concerns | Major concerns | No concerns   | No concerns | Moderate |
| CP+PC:Mind+PC  | 0 | Some concerns | Undetected | No concerns | Some concerns  | Some concerns | No concerns | Moderate |
| CP+PC:NI       | 0 | Some concerns | Undetected | No concerns | Major concerns | No concerns   | No concerns | Moderate |



|          |   |               |            |             |               |               |             |          |
|----------|---|---------------|------------|-------------|---------------|---------------|-------------|----------|
| PE:UC    | 0 | Some concerns | Undetected | No concerns | No concerns   | Some concerns | No concerns | Moderate |
| PE+PC:UC | 0 | Some concerns | Undetected | No concerns | Some concerns | No concerns   | No concerns | Moderate |
| PC:UC    | 0 | Some concerns | Undetected | No concerns | Some concerns | Some concerns | No concerns | Moderate |

Adv: advice, BT: behavioural therapy, BT+PC: behavioural therapy delivered with physiotherapy care, CBT: cognitive behavioural therapy, CBT+PC: cognitive behavioural therapy delivered with physiotherapy care, CP: combined psychological approaches, CP+PC: combined psychological approaches delivered with physiotherapy care, Csl: counselling, GP: general practitioner care, Mind: mindfulness, Mind+PC: mindfulness delivered with physiotherapy care, NI: no intervention, PC: physiotherapy care, PE: pain education, PE+PC: pain education delivered with physiotherapy care, UC: usual care.

**Supplementary Table 12.8** Pain intensity at long-term treatment sustainability

| Comparison   | n studies | Within-study bias | Reporting bias | Indirectness | Imprecision    | Heterogeneity  | Incoherence | Confidence rating |
|--------------|-----------|-------------------|----------------|--------------|----------------|----------------|-------------|-------------------|
| BT:BT+PC     | 1         | Some concerns     | Undetected     | No concerns  | Major concerns | No concerns    | No concerns | Moderate          |
| BT:PC        | 1         | Some concerns     | Undetected     | No concerns  | Major concerns | No concerns    | No concerns | Moderate          |
| BT+PC:CBT+PC | 1         | Major concerns    | Undetected     | No concerns  | Major concerns | No concerns    | No concerns | Low               |
| BT+PC:PC     | 2         | Some concerns     | Undetected     | No concerns  | Major concerns | No concerns    | No concerns | Moderate          |
| CBT:CBT+PC   | 1         | Some concerns     | Undetected     | No concerns  | Major concerns | No concerns    | No concerns | Moderate          |
| CBT:GP       | 1         | Some concerns     | Undetected     | No concerns  | Major concerns | No concerns    | No concerns | Moderate          |
| CBT:PC       | 1         | Some concerns     | Undetected     | No concerns  | Major concerns | No concerns    | No concerns | Moderate          |
| CBT+PC:PC    | 5         | Some concerns     | Undetected     | No concerns  | No concerns    | Major concerns | No concerns | Moderate          |
| CP+PC:PC     | 2         | Some concerns     | Undetected     | No concerns  | Major concerns | No concerns    | No concerns | Moderate          |
| CP:GP        | 1         | Some concerns     | Undetected     | No concerns  | Major concerns | No concerns    | No concerns | Moderate          |
| CP:UC        | 1         | Some concerns     | Undetected     | No concerns  | Major concerns | No concerns    | No concerns | Moderate          |
| PE:UC        | 1         | Major concerns    | Undetected     | No concerns  | Major concerns | No concerns    | No concerns | Low               |
| BT:CBT       | 0         | Some concerns     | Undetected     | No concerns  | Major concerns | No concerns    | No concerns | Moderate          |
| BT:CBT+PC    | 0         | Some concerns     | Undetected     | No concerns  | Major concerns | No concerns    | No concerns | Moderate          |
| BT:CP+PC     | 0         | Some concerns     | Undetected     | No concerns  | Major concerns | No concerns    | No concerns | Moderate          |
| BT:CP        | 0         | Some concerns     | Undetected     | No concerns  | Major concerns | No concerns    | No concerns | Moderate          |
| BT:GP        | 0         | Some concerns     | Undetected     | No concerns  | Major concerns | No concerns    | No concerns | Moderate          |
| BT:PE        | 0         | Some concerns     | Undetected     | No concerns  | Major concerns | No concerns    | No concerns | Moderate          |
| BT:UC        | 0         | Some concerns     | Undetected     | No concerns  | Major concerns | No concerns    | No concerns | Moderate          |

|              |   |               |            |             |                |             |             |          |
|--------------|---|---------------|------------|-------------|----------------|-------------|-------------|----------|
| BT+PC:CBT    | 0 | Some concerns | Undetected | No concerns | Major concerns | No concerns | No concerns | Moderate |
| BT+PC:CP+PC  | 0 | Some concerns | Undetected | No concerns | Major concerns | No concerns | No concerns | Moderate |
| BT+PC:CP     | 0 | Some concerns | Undetected | No concerns | Major concerns | No concerns | No concerns | Moderate |
| BT+PC:GP     | 0 | Some concerns | Undetected | No concerns | Major concerns | No concerns | No concerns | Moderate |
| BT+PC:PE     | 0 | Some concerns | Undetected | No concerns | Major concerns | No concerns | No concerns | Moderate |
| BT+PC:UC     | 0 | Some concerns | Undetected | No concerns | Major concerns | No concerns | No concerns | Moderate |
| CBT:CP+PC    | 0 | Some concerns | Undetected | No concerns | Major concerns | No concerns | No concerns | Moderate |
| CBT:CP       | 0 | Some concerns | Undetected | No concerns | Major concerns | No concerns | No concerns | Moderate |
| CBT:PE       | 0 | Some concerns | Undetected | No concerns | Major concerns | No concerns | No concerns | Moderate |
| CBT:UC       | 0 | Some concerns | Undetected | No concerns | Major concerns | No concerns | No concerns | Moderate |
| CBT+PC:CP+PC | 0 | Some concerns | Undetected | No concerns | Major concerns | No concerns | No concerns | Moderate |
| CBT+PC:CP    | 0 | Some concerns | Undetected | No concerns | Major concerns | No concerns | No concerns | Moderate |
| CBT+PC:GP    | 0 | Some concerns | Undetected | No concerns | Major concerns | No concerns | No concerns | Moderate |
| CBT+PC:PE    | 0 | Some concerns | Undetected | No concerns | Major concerns | No concerns | No concerns | Moderate |
| CBT+PC:UC    | 0 | Some concerns | Undetected | No concerns | Major concerns | No concerns | No concerns | Moderate |
| CP:CP+PC     | 0 | Some concerns | Undetected | No concerns | Major concerns | No concerns | No concerns | Moderate |
| CP+PC:GP     | 0 | Some concerns | Undetected | No concerns | Major concerns | No concerns | No concerns | Moderate |
| CP+PC:PE     | 0 | Some concerns | Undetected | No concerns | Major concerns | No concerns | No concerns | Moderate |
| CP+PC:UC     | 0 | Some concerns | Undetected | No concerns | Major concerns | No concerns | No concerns | Moderate |
| CP:PE        | 0 | Some concerns | Undetected | No concerns | Major concerns | No concerns | No concerns | Moderate |
| CP:PC        | 0 | Some concerns | Undetected | No concerns | Major concerns | No concerns | No concerns | Moderate |
| GP:PE        | 0 | Some concerns | Undetected | No concerns | Major concerns | No concerns | No concerns | Moderate |
| GP:PC        | 0 | Some concerns | Undetected | No concerns | Major concerns | No concerns | No concerns | Moderate |
| GP:UC        | 0 | Some concerns | Undetected | No concerns | Major concerns | No concerns | No concerns | Moderate |
| PE:PC        | 0 | Some concerns | Undetected | No concerns | Major concerns | No concerns | No concerns | Moderate |
| PC:UC        | 0 | Some concerns | Undetected | No concerns | Major concerns | No concerns | No concerns | Moderate |

BT: behavioural therapy, BT+PC: behavioural therapy delivered with physiotherapy care, CBT: cognitive behavioural therapy, CBT+PC: cognitive behavioural therapy delivered with physiotherapy care, CP: combined psychological approaches, CP+PC: combined psychological approaches delivered with physiotherapy care, GP: general practitioner care, PC: physiotherapy care, PE: pain education, UC: usual care.

## Supplementary L. Rank results for physical function and pain intensity

Supplementary Table 13.1 Physical function at post-intervention

| Rank             | Treatment Node            | SUCRA | Mean Rank |
|------------------|---------------------------|-------|-----------|
| 1 <sup>st</sup>  | CBT+PC                    | 92.3  | 2.2       |
| 2 <sup>nd</sup>  | Csl+PC                    | 81.8  | 3.9       |
| 3 <sup>rd</sup>  | PE+PC                     | 72.6  | 5.4       |
| 4 <sup>th</sup>  | CBT                       | 60.3  | 7.4       |
| 5 <sup>th</sup>  | CP                        | 56.9  | 7.9       |
| 6 <sup>th</sup>  | Mindfulness               | 56.4  | 8         |
| 7 <sup>th</sup>  | General practitioner care | 50.4  | 8.9       |
| 8 <sup>th</sup>  | No intervention           | 46.9  | 9.5       |
| 9 <sup>th</sup>  | Mindfulness+PC            | 46.8  | 9.5       |
| 10 <sup>th</sup> | CP+PC                     | 45.4  | 9.7       |
| 11 <sup>th</sup> | PE                        | 41    | 10.4      |
| 12 <sup>th</sup> | BT+PC                     | 40.4  | 10.5      |
| 13 <sup>th</sup> | Usual care                | 34    | 11.6      |
| 14 <sup>th</sup> | Advice                    | 33.3  | 11.7      |
| 15 <sup>th</sup> | BT                        | 32.9  | 11.7      |
| 16 <sup>th</sup> | Csl                       | 30.8  | 12.1      |
| 17 <sup>th</sup> | Physiotherapy care        | 27.8  | 12.5      |

BT: behavioural therapy, BT+PC: behavioural therapy delivered with physiotherapy care, CBT: cognitive behavioural therapy, CBT+PC: cognitive behavioural therapy delivered with physiotherapy care, CP: combined psychological approaches, CP+PC: combined psychological approaches delivered with physiotherapy care, Csl: counselling, Csl+PC: counselling delivered with physiotherapy care, Mindfulness+PC: mindfulness delivered with physiotherapy care, PC: physiotherapy care, PE: pain education, PE+PC: pain education delivered with physiotherapy care.

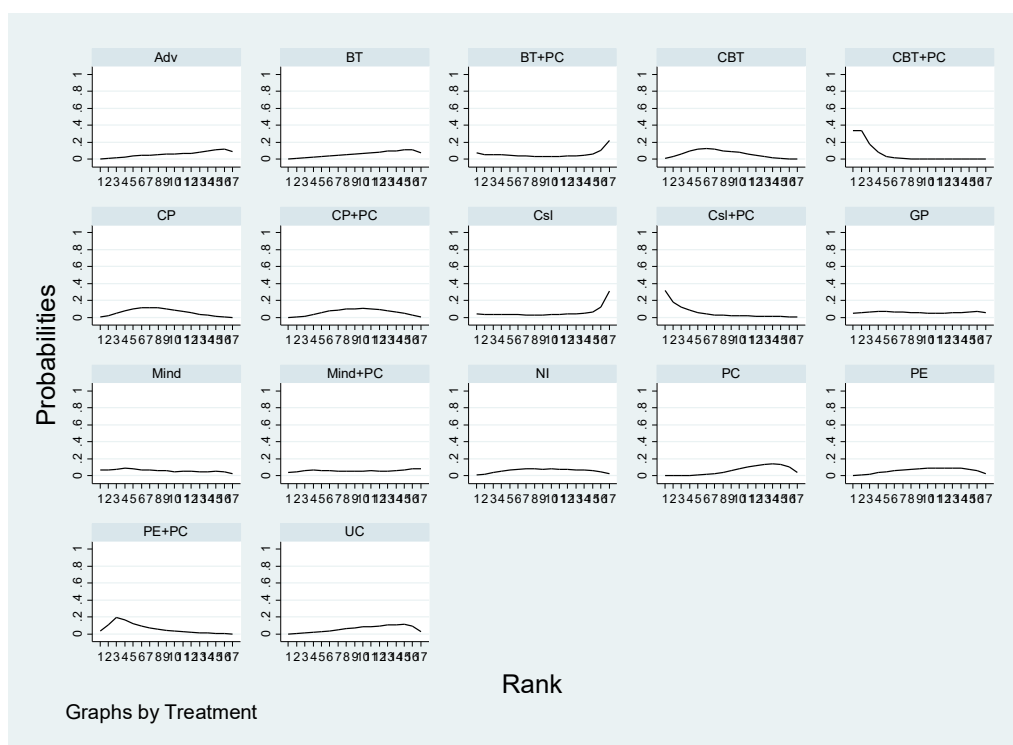

**Supplementary Table 13.2a** Physical function at short-term treatment sustainability

| Rank             | Treatment Node            | SUCRA | Mean Rank |
|------------------|---------------------------|-------|-----------|
| 1 <sup>st</sup>  | PE+PC                     | 85.6  | 2.7       |
| 2 <sup>nd</sup>  | CBT+PC                    | 84.5  | 2.9       |
| 3 <sup>rd</sup>  | PE                        | 61.4  | 5.6       |
| 4 <sup>th</sup>  | CP+PC                     | 57.2  | 6.1       |
| 5 <sup>th</sup>  | CP                        | 56.1  | 6.3       |
| 6 <sup>th</sup>  | CBT                       | 53.7  | 6.6       |
| 7 <sup>th</sup>  | Advice                    | 53.5  | 6.6       |
| 8 <sup>th</sup>  | Mindfulness+PC            | 46.6  | 7.4       |
| 9 <sup>th</sup>  | General practitioner care | 43.4  | 7.8       |
| 10 <sup>th</sup> | Usual care                | 32    | 9.2       |
| 11 <sup>th</sup> | No intervention           | 28.8  | 9.5       |
| 12 <sup>th</sup> | BT                        | 23.7  | 10.2      |
| 13 <sup>th</sup> | Physiotherapy care        | 23.5  | 10.2      |

BT: behavioural therapy, CBT: cognitive behavioural therapy, CBT+PC: cognitive behavioural therapy delivered with physiotherapy care, CP: combined psychological approaches, CP+PC: combined psychological approaches delivered with physiotherapy care, Mindfulness+PC: mindfulness delivered with physiotherapy care, PE: pain education, PE+PC: pain education delivered with physiotherapy care.

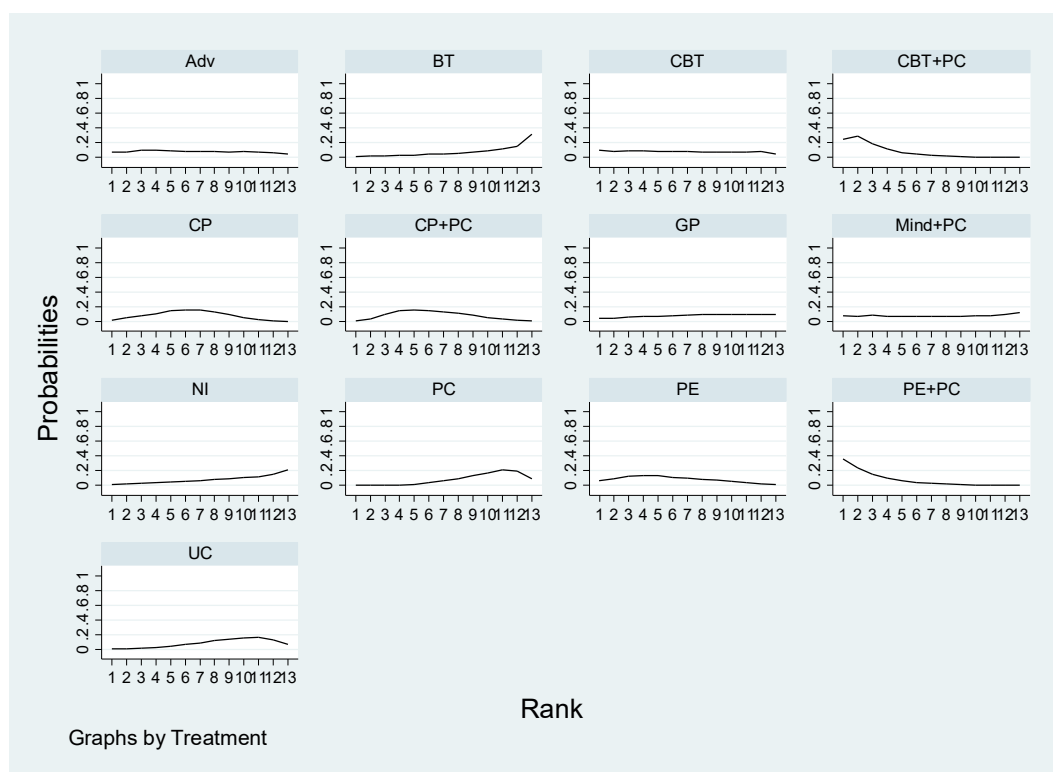



**Supplementary Table 13.2b** Physical function at short-term treatment sustainability, after removing inconsistency

| Rank             | Treatment Node            | SUCRA | Mean Rank |
|------------------|---------------------------|-------|-----------|
| 1 <sup>st</sup>  | PE+PC                     | 99.9  | 1         |
| 2 <sup>nd</sup>  | CBT+PC                    | 85.2  | 2.8       |
| 3 <sup>rd</sup>  | Mindfulness+PC            | 70.6  | 4.5       |
| 4 <sup>th</sup>  | CP+PC                     | 60.5  | 5.7       |
| 5 <sup>th</sup>  | CP                        | 54.4  | 6.5       |
| 6 <sup>th</sup>  | CBT                       | 49.4  | 7.1       |
| 7 <sup>th</sup>  | Physiotherapy care        | 48.6  | 7.2       |
| 8 <sup>th</sup>  | Advice                    | 48.3  | 7.2       |
| 9 <sup>th</sup>  | General practitioner care | 35.1  | 8.8       |
| 10 <sup>th</sup> | Usual care                | 28.5  | 9.6       |
| 11 <sup>th</sup> | BT                        | 27.4  | 9.7       |
| 12 <sup>th</sup> | PE                        | 25.6  | 9.9       |
| 13 <sup>th</sup> | No intervention           | 16.5  | 11        |

BT: behavioural therapy, CBT: cognitive behavioural therapy, CBT+PC: cognitive behavioural therapy delivered with physiotherapy care, CP: combined psychological approaches, CP+PC: combined psychological approaches delivered with physiotherapy care, Mindfulness+PC: mindfulness delivered with physiotherapy care, PE: pain education, PE+PC: pain education delivered with physiotherapy care.

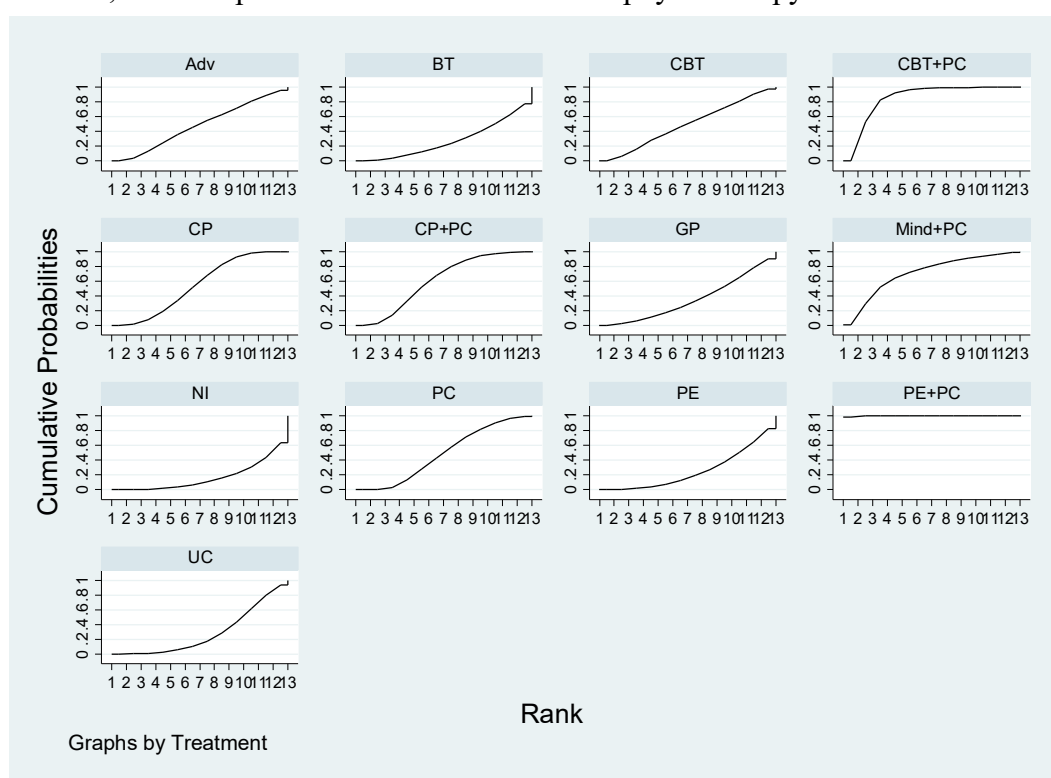

**Supplementary Table 13.3a** Physical function at mid-term treatment sustainability

| Rank             | Treatment Node            | SUCRA | Mean Rank |
|------------------|---------------------------|-------|-----------|
| 1 <sup>st</sup>  | PE+PC                     | 90.7  | 2.3       |
| 2 <sup>nd</sup>  | CP+PC                     | 83.9  | 3.3       |
| 3 <sup>rd</sup>  | CBT+PC                    | 77.6  | 4.1       |
| 4 <sup>th</sup>  | PE                        | 75.5  | 4.4       |
| 5 <sup>th</sup>  | Mindfulness               | 58.9  | 6.8       |
| 6 <sup>th</sup>  | CBT                       | 58.3  | 6.8       |
| 7 <sup>th</sup>  | CP                        | 56.3  | 7.1       |
| 8 <sup>th</sup>  | Csl                       | 52.4  | 7.7       |
| 9 <sup>th</sup>  | Advice                    | 44.8  | 8.7       |
| 10 <sup>th</sup> | Mindfulness+PC            | 33.7  | 10.3      |
| 11 <sup>th</sup> | Physiotherapy care        | 33.4  | 10.3      |
| 12 <sup>th</sup> | No intervention           | 27.2  | 11.2      |
| 13 <sup>th</sup> | BT                        | 20.6  | 12.1      |
| 14 <sup>th</sup> | Usual care                | 18.5  | 12.4      |
| 15 <sup>th</sup> | General practitioner care | 18.5  | 12.4      |

BT: behavioural therapy, CBT: cognitive behavioural therapy, CBT+PC: cognitive behavioural therapy delivered with physiotherapy care, CP: combined psychological approach, CP+PC: combined psychological approaches delivered with physiotherapy care, Csl: counselling, Mindfulness+PC: mindfulness delivered with physiotherapy care, PE: pain education, PE+PC: pain education delivered with physiotherapy care.

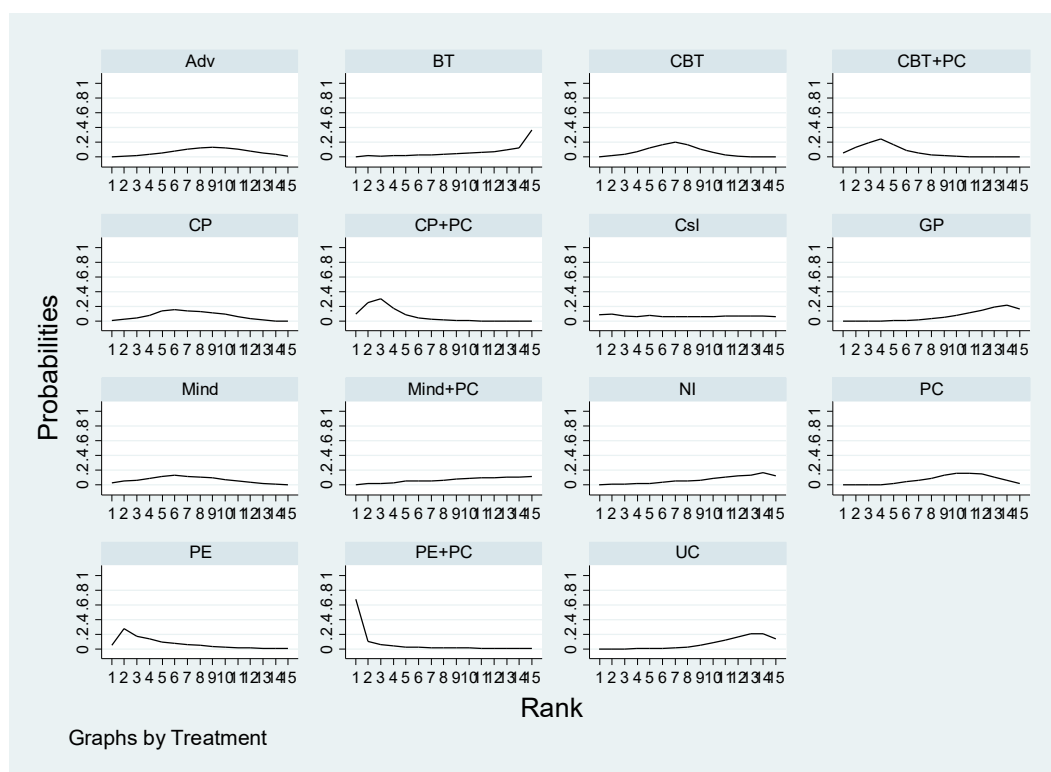

**Supplementary Table 13.3b** Physical function at mid-term treatment sustainability, after removing inconsistency

| Rank             | Treatment Node            | SUCRA | Mean Rank |
|------------------|---------------------------|-------|-----------|
| 1 <sup>st</sup>  | CP+PC                     | 94.6  | 1.8       |
| 2 <sup>nd</sup>  | PE+PC                     | 84.5  | 3.2       |
| 3 <sup>rd</sup>  | CBT+PC                    | 79.5  | 3.9       |
| 4 <sup>th</sup>  | Mindfulness               | 65.1  | 5.9       |
| 5 <sup>th</sup>  | CP                        | 64.8  | 5.9       |
| 6 <sup>th</sup>  | CBT                       | 62.3  | 6.3       |
| 7 <sup>th</sup>  | Csl                       | 55.1  | 7.3       |
| 8 <sup>th</sup>  | PE                        | 52.1  | 7.7       |
| 9 <sup>th</sup>  | Advice                    | 43.8  | 8.9       |
| 10 <sup>th</sup> | Mindfulness+PC            | 42.7  | 9         |
| 11 <sup>th</sup> | Physiotherapy care        | 38.1  | 9.7       |
| 12 <sup>th</sup> | No intervention           | 20.8  | 12.1      |
| 13 <sup>th</sup> | Usual care                | 16.2  | 12.7      |
| 14 <sup>th</sup> | General practitioner care | 15.3  | 12.9      |
| 15 <sup>th</sup> | BT                        | 15.1  | 12.9      |

BT: behavioural therapy, CBT: cognitive behavioural therapy, CBT+PC: cognitive behavioural therapy delivered with physiotherapy care, CP: combined psychological approach, CP+PC: combined psychological approaches delivered with physiotherapy care, Csl: counselling, Mindfulness+PC: mindfulness delivered with physiotherapy care, PE: pain education, PE+PC: pain education delivered with physiotherapy care.

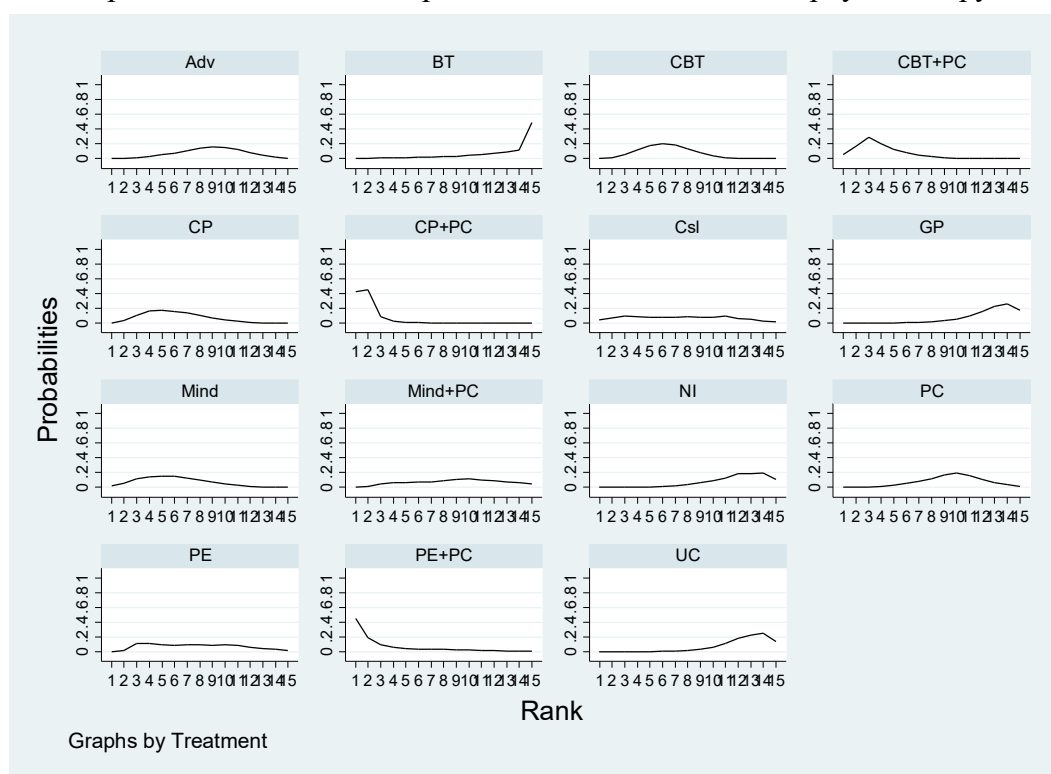

**Supplementary Table 13.4 Physical function at long-term treatment sustainability**

| Rank             | Treatment Node            | SUCRA | Mean Rank |
|------------------|---------------------------|-------|-----------|
| 1 <sup>st</sup>  | CBT+PC                    | 62.7  | 4.4       |
| 2 <sup>nd</sup>  | Csl                       | 57.2  | 4.8       |
| 3 <sup>rd</sup>  | CP                        | 56.2  | 4.9       |
| 4 <sup>th</sup>  | No intervention           | 55    | 5         |
| 5 <sup>th</sup>  | PE                        | 53.9  | 5.1       |
| 6 <sup>th</sup>  | CBT                       | 50.8  | 5.4       |
| 7 <sup>th</sup>  | Usual care                | 50.3  | 5.5       |
| 8 <sup>th</sup>  | General practitioner care | 45.9  | 5.9       |
| 9 <sup>th</sup>  | Physiotherapy care        | 34.1  | 6.9       |
| 10 <sup>th</sup> | CP+PC                     | 33.8  | 7         |

CBT: cognitive behavioural therapy, CBT+PC: cognitive behavioural therapy delivered with physiotherapy care, CP: combined psychological approaches, CP+PC: combined psychological approaches delivered with physiotherapy care, Csl: counselling, PE: pain education.

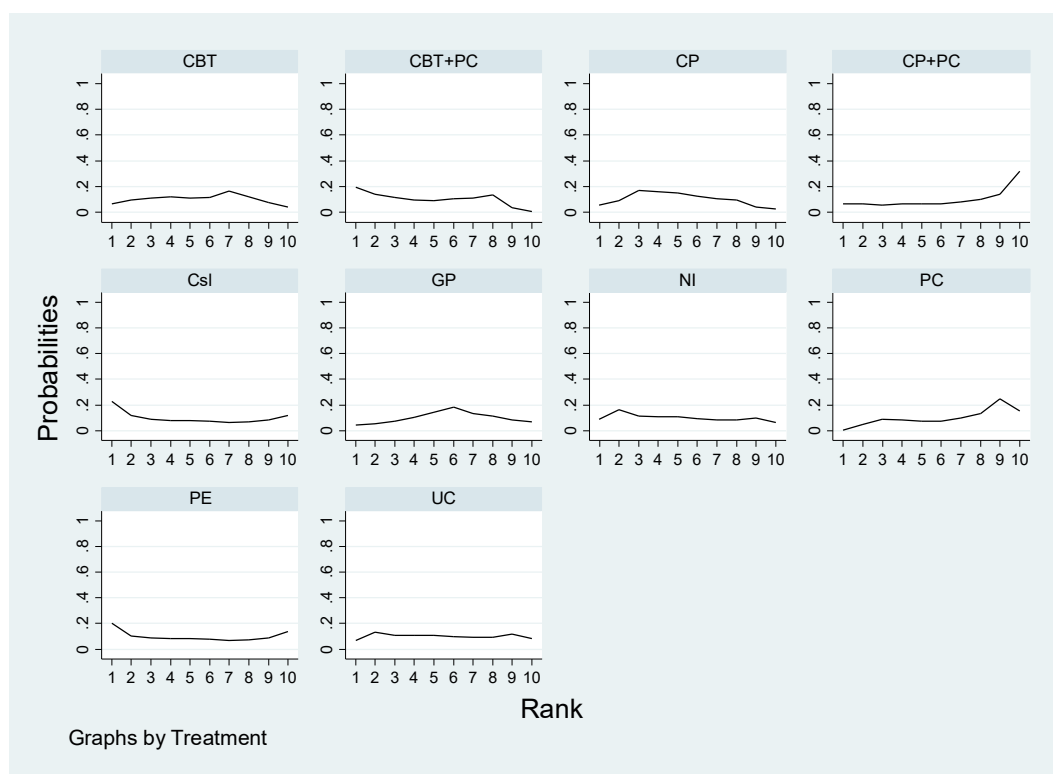

**Supplementary Table 13.5** Pain intensity at post-intervention

| Rank             | Treatment Node            | SUCRA | Mean Rank |
|------------------|---------------------------|-------|-----------|
| 1 <sup>st</sup>  | BT+PC                     | 91.2  | 2.4       |
| 2 <sup>nd</sup>  | CBT+PC                    | 88.6  | 2.8       |
| 3 <sup>rd</sup>  | PE+PC                     | 87.8  | 3         |
| 4 <sup>th</sup>  | Mindfulness+PC            | 65.3  | 6.6       |
| 5 <sup>th</sup>  | CBT                       | 57.3  | 7.8       |
| 6 <sup>th</sup>  | PE                        | 54.3  | 8.3       |
| 7 <sup>th</sup>  | Mindfulness               | 51.3  | 8.8       |
| 8 <sup>th</sup>  | CP                        | 50.2  | 9         |
| 9 <sup>th</sup>  | CP+PC                     | 50    | 9         |
| 10 <sup>th</sup> | Csl+PC                    | 49.8  | 9         |
| 11 <sup>th</sup> | BT                        | 44.9  | 9.8       |
| 12 <sup>th</sup> | Advice                    | 44.2  | 9.9       |
| 13 <sup>th</sup> | Physiotherapy care        | 41    | 10.4      |
| 14 <sup>th</sup> | Usual care                | 34.2  | 11.5      |
| 15 <sup>th</sup> | General practitioner care | 23.9  | 13.2      |
| 16 <sup>th</sup> | No intervention           | 12.5  | 15        |
| 17 <sup>th</sup> | Csl                       | 3.4   | 16.4      |

BT: behavioural therapy, BT+PC: behavioural therapy delivered with physiotherapy care, CBT: cognitive behavioural therapy, CBT+PC: cognitive behavioural therapy delivered with physiotherapy care, CP: combined psychological approaches, CP+PC: combined psychological approaches delivered with physiotherapy care, Csl: counselling, Csl+PC: counselling delivered with physiotherapy care, Mindfulness+PC: Mindfulness delivered with physiotherapy care, NI: no intervention, PE: pain education, PE+PC: pain education delivered with physiotherapy care.

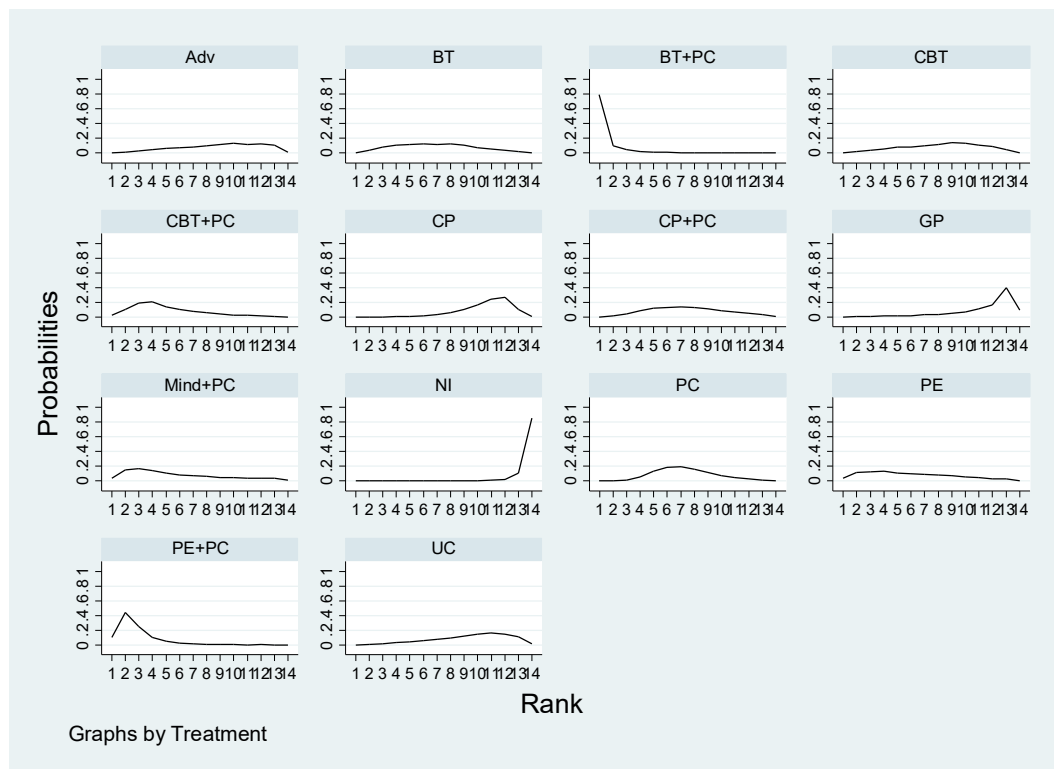

**Supplementary Table 13.6a Pain intensity at short-term treatment sustainability**

| Rank             | Treatment Node            | SUCRA | Mean Rank |
|------------------|---------------------------|-------|-----------|
| 1 <sup>st</sup>  | BT+PC                     | 96.7  | 1.4       |
| 2 <sup>nd</sup>  | PE+PC                     | 86.3  | 2.8       |
| 3 <sup>rd</sup>  | CBT+PC                    | 69.6  | 4.9       |
| 4 <sup>th</sup>  | Mindfulness+PC            | 65.5  | 5.5       |
| 5 <sup>th</sup>  | PE                        | 62.2  | 5.9       |
| 6 <sup>th</sup>  | BT                        | 54.4  | 6.9       |
| 7 <sup>th</sup>  | Physiotherapy care        | 51.4  | 7.3       |
| 8 <sup>th</sup>  | CP+PC                     | 49.9  | 7.5       |
| 9 <sup>th</sup>  | CBT                       | 43.9  | 8.3       |
| 10 <sup>th</sup> | Advice                    | 38.7  | 9         |
| 11 <sup>th</sup> | Usual care                | 34.4  | 9.5       |
| 12 <sup>th</sup> | CP                        | 26.4  | 10.6      |
| 13 <sup>th</sup> | General practitioner care | 18.9  | 11.5      |
| 14 <sup>th</sup> | No intervention           | 1.6   | 13.8      |

BT: behavioural therapy, BT+PC: behavioural therapy delivered with physiotherapy care, CBT: cognitive behavioural therapy, CBT+PC: cognitive behavioural therapy delivered with physiotherapy care, CP: combined psychological approaches, CP+PC: combined psychological approaches delivered with physiotherapy care, Mindfulness+PC: mindfulness delivered with physiotherapy care, PE: pain education, PE+PC: pain education delivered with physiotherapy care.

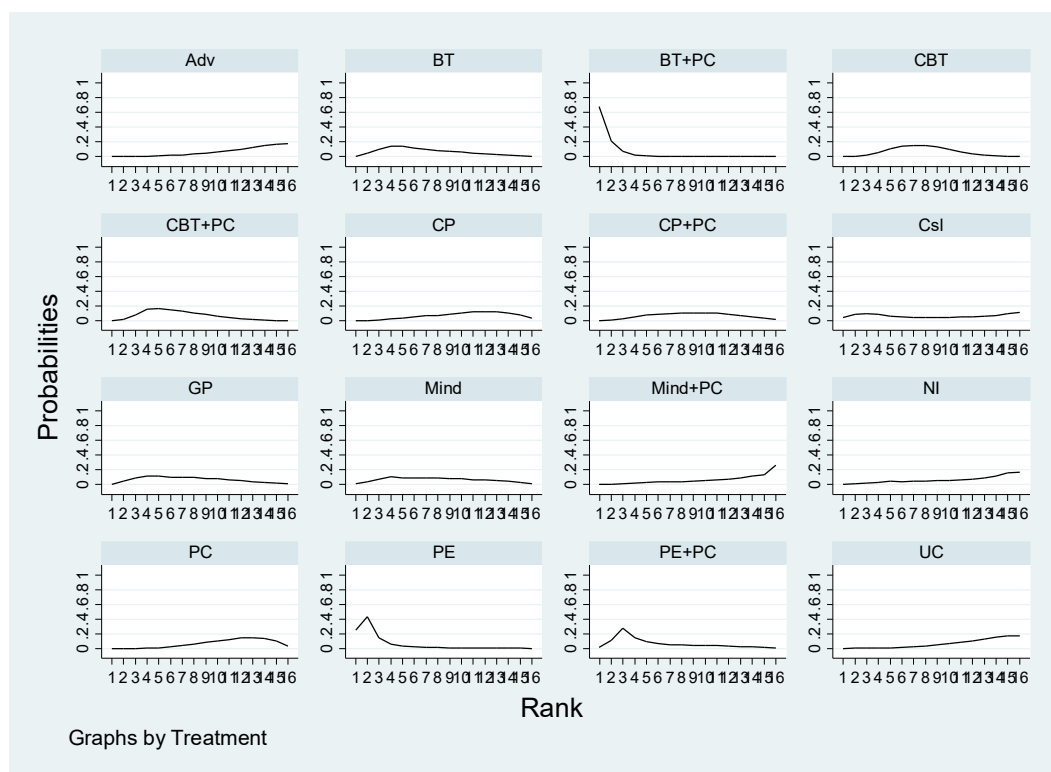

**Supplementary Table 13.6b** Pain intensity at short-term treatment sustainability, after removing inconsistency

| Rank             | Treatment Node            | SUCRA | Mean Rank |
|------------------|---------------------------|-------|-----------|
| 1 <sup>st</sup>  | PE+PC                     | 92.3  | 1.9       |
| 2 <sup>nd</sup>  | CBT+PC                    | 74.6  | 4         |
| 3 <sup>rd</sup>  | PE                        | 73.7  | 4.2       |
| 4 <sup>th</sup>  | CBT                       | 67    | 5         |
| 5 <sup>th</sup>  | Mindfulness+PC            | 55.5  | 6.3       |
| 6 <sup>th</sup>  | BT                        | 49.5  | 7.1       |
| 7 <sup>th</sup>  | Advice                    | 44.9  | 7.6       |
| 8 <sup>th</sup>  | No intervention           | 43.5  | 7.8       |
| 9 <sup>th</sup>  | CP                        | 40.5  | 8.1       |
| 10 <sup>th</sup> | CP+PC                     | 39.2  | 8.3       |
| 11 <sup>th</sup> | Usual care                | 37.6  | 8.5       |
| 12 <sup>th</sup> | Physiotherapy care        | 25.6  | 9.9       |
| 13 <sup>th</sup> | General practitioner care | 5.9   | 12.3      |

BT: behavioural therapy, CBT: cognitive behavioural therapy, CBT+PC: cognitive behavioural therapy delivered with physiotherapy care, CP: combined psychological approaches, CP+PC: combined psychological approaches delivered with physiotherapy care, Mindfulness+PC: mindfulness delivered with physiotherapy care, PE: pain education, PE+PC: pain education delivered with physiotherapy care.

Note: Behavioural therapy delivered with physiotherapy care (BT+PC) became disconnected from the network in sensitivity analyses performed to remove inconsistency at short-term treatment sustainability, for pain intensity. No surface under the cumulative ranking (SUCRA) results are available for BT+PC at this time point.

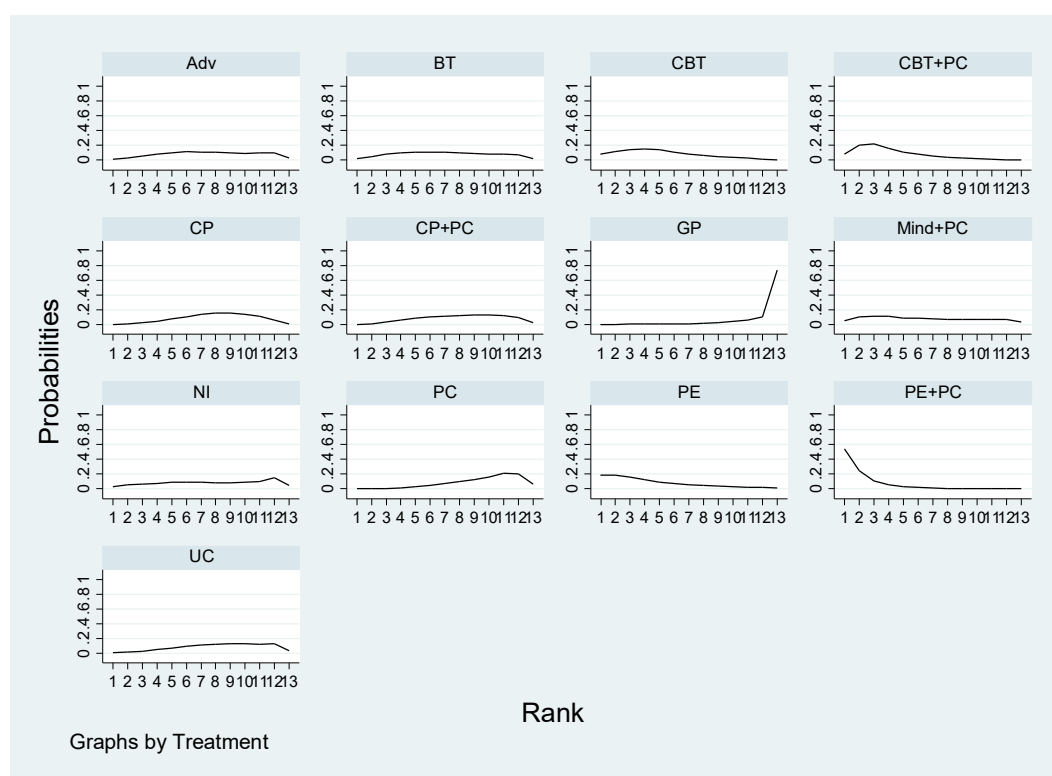

**Supplementary Table 13.7** Pain intensity at mid-term treatment sustainability

| Rank             | Treatment Node            | SUCRA | Mean Rank |
|------------------|---------------------------|-------|-----------|
| 1 <sup>st</sup>  | BT+PC                     | 96.6  | 1.5       |
| 2 <sup>nd</sup>  | PE                        | 89    | 2.6       |
| 3 <sup>rd</sup>  | PE+PC                     | 68.9  | 5.7       |
| 4 <sup>th</sup>  | CBT+PC                    | 63    | 6.6       |
| 5 <sup>th</sup>  | BT                        | 61.8  | 6.7       |
| 6 <sup>th</sup>  | General practitioner care | 57.6  | 7.4       |
| 7 <sup>th</sup>  | CBT                       | 55    | 7.7       |
| 8 <sup>th</sup>  | Mindfulness               | 54.2  | 7.9       |
| 9 <sup>th</sup>  | Csl                       | 48.4  | 8.7       |
| 10 <sup>th</sup> | CP+PC                     | 46.6  | 9         |
| 11 <sup>th</sup> | CP                        | 34.5  | 10.8      |
| 12 <sup>th</sup> | No intervention           | 29.3  | 11.6      |
| 13 <sup>th</sup> | Physiotherapy care        | 28.9  | 11.7      |
| 14 <sup>th</sup> | Mindfulness+PC            | 23.5  | 12.5      |
| 15 <sup>th</sup> | Advice                    | 21.6  | 12.8      |
| 16 <sup>th</sup> | Usual care                | 21.3  | 12.8      |

BT: behavioural therapy, BT+PC: behavioural therapy delivered with physiotherapy care, CBT: cognitive behavioural therapy, CBT+PC: cognitive behavioural therapy delivered with physiotherapy care, CP: combined psychological approaches, CP+PC: combined psychological approaches delivered with physiotherapy care, Csl: counselling, Mindfulness+PC: mindfulness delivered with physiotherapy care, PE: pain education, PE+PC: pain education delivered with physiotherapy care.

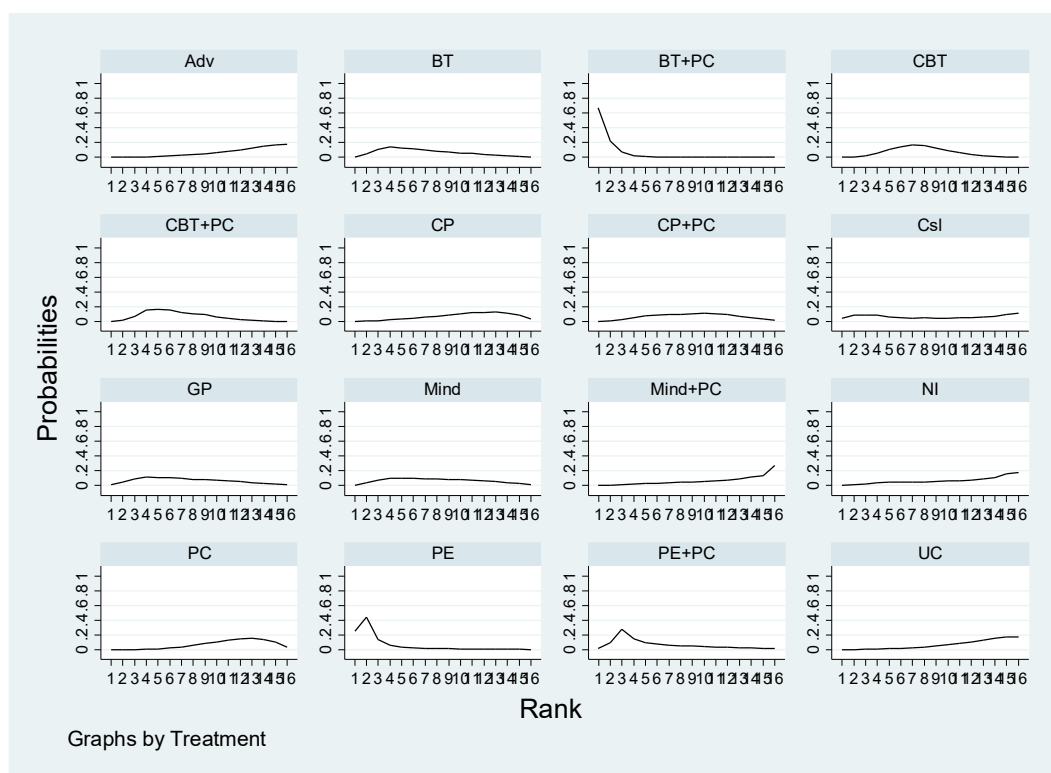



**Supplementary Table 13.8** Pain intensity at long-term treatment sustainability

| Rank             | Treatment Node            | SUCRA | Mean Rank |
|------------------|---------------------------|-------|-----------|
| 1 <sup>st</sup>  | CBT+PC                    | 69.2  | 3.8       |
| 2 <sup>nd</sup>  | BT+PC                     | 59    | 4.7       |
| 3 <sup>rd</sup>  | CBT                       | 57.8  | 4.8       |
| 4 <sup>th</sup>  | General practitioner care | 57.3  | 4.8       |
| 5 <sup>th</sup>  | CP+PC                     | 51.7  | 5.3       |
| 6 <sup>th</sup>  | BT                        | 50.4  | 5.5       |
| 7 <sup>th</sup>  | PE                        | 42.6  | 6.2       |
| 8 <sup>th</sup>  | CP                        | 39    | 6.5       |
| 9 <sup>th</sup>  | Usual care                | 38.6  | 6.5       |
| 10 <sup>th</sup> | Physiotherapy care        | 34.4  | 6.9       |

BT: behavioural therapy, BT+PC: behavioural therapy delivered with physiotherapy care, CBT: cognitive behavioural therapy, CBT+PC: cognitive behavioural therapy delivered with physiotherapy care, CP: combined psychological approaches, CP+PC: combined psychological approaches delivered with physiotherapy care, PE: pain education.

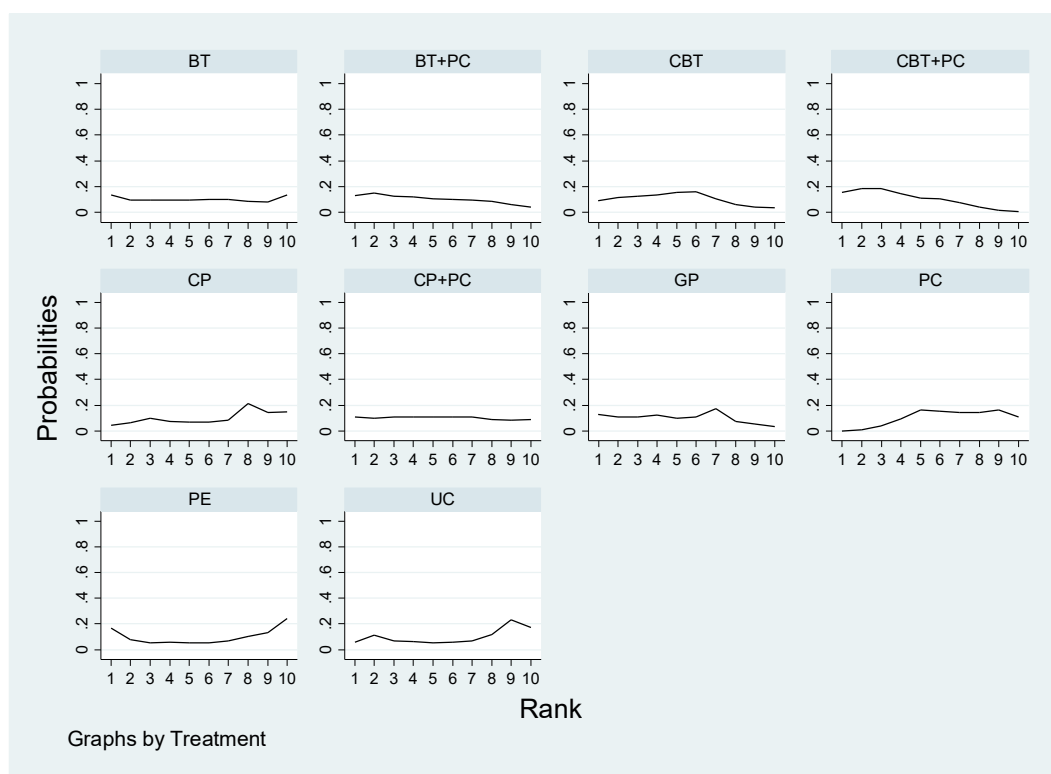

## Supplementary M. Comparison-adjusted funnel plot for physical function and pain intensity

Supplementary Figure 7. Physical function at post-intervention

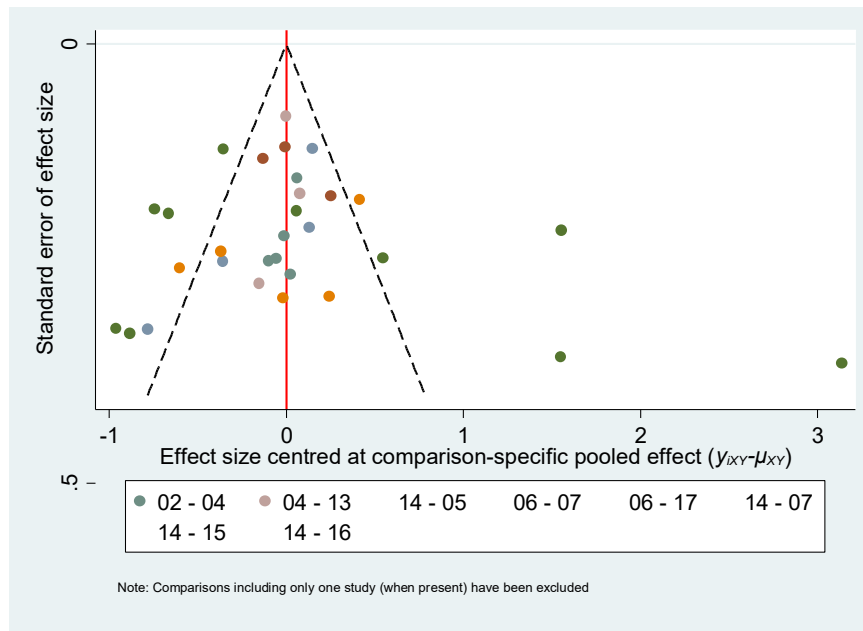

01: advice, 02: behavioural therapy, 03: behavioural therapy delivered with physiotherapy care, 04: cognitive behavioural therapy, 05: cognitive behavioural therapy delivered with physiotherapy care, 06: combined psychological approaches, 07: combined psychological approaches delivered with physiotherapy care, 08: counselling, 09: counselling delivered with physiotherapy care, 10: general practitioner care, 11: mindfulness, 12: mindfulness delivered with physiotherapy care, 13: no intervention, 14: physiotherapy care, 15: pain education, 16: pain education delivered with physiotherapy care, 17: usual care.

**Supplementary Figure 8.** Physical function at short-term treatment sustainability

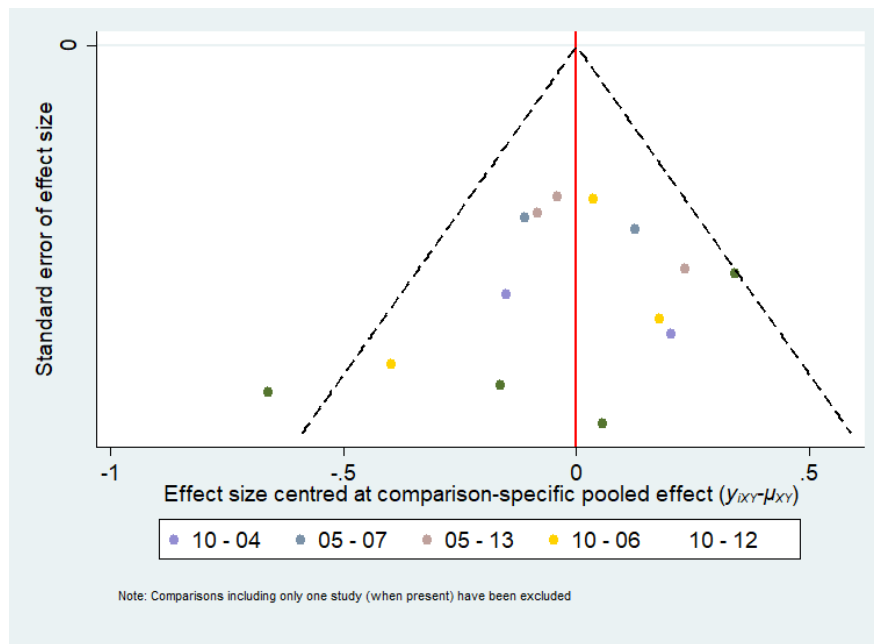

01: advice, 02: behavioural therapy, 03: cognitive behavioural therapy, 04: cognitive behavioural therapy delivered with physiotherapy care, 05: combined psychological approaches, 06: combined psychological approaches delivered with physiotherapy care, 07: general practitioner care, 08: mindfulness delivered with physiotherapy care, 09: no intervention, 10: physiotherapy care, 11: pain education, 12: pain education delivered with physiotherapy care, 13: usual care.

**Supplementary Figure 9.** Physical function at mid-term treatment sustainability

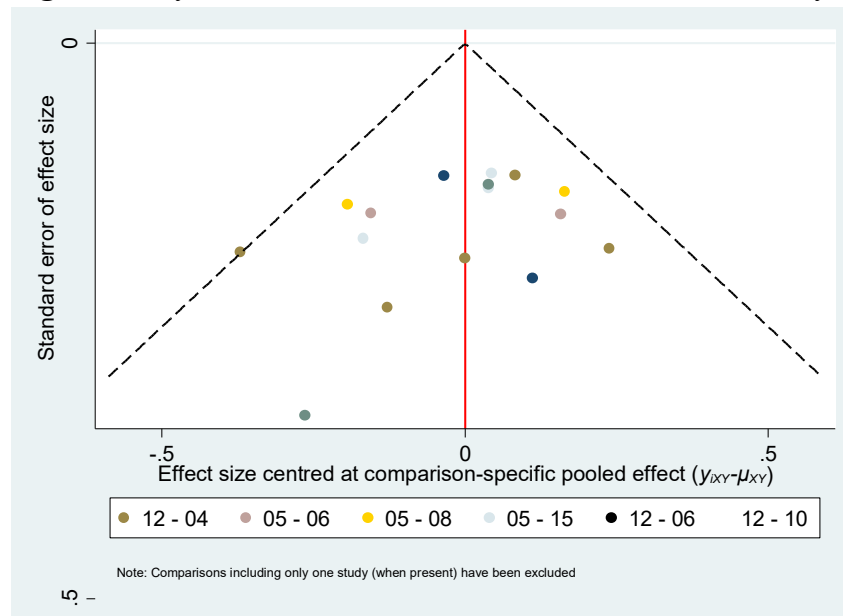

01: advice, 02: behavioural therapy, 03: cognitive behavioural therapy, 04: cognitive behavioural therapy delivered with physiotherapy care, 05: combined psychological approaches, 06: combined psychological approaches delivered with physiotherapy care, 07: counselling, 08: general practitioner care, 09: mindfulness, 10: mindfulness delivered with physiotherapy care, 11: no intervention, 12: physiotherapy care, 13: pain education, 14: pain education delivered with physiotherapy care, 15: usual care.

**Supplementary Figure 10. Physical function at long-term treatment sustainability**

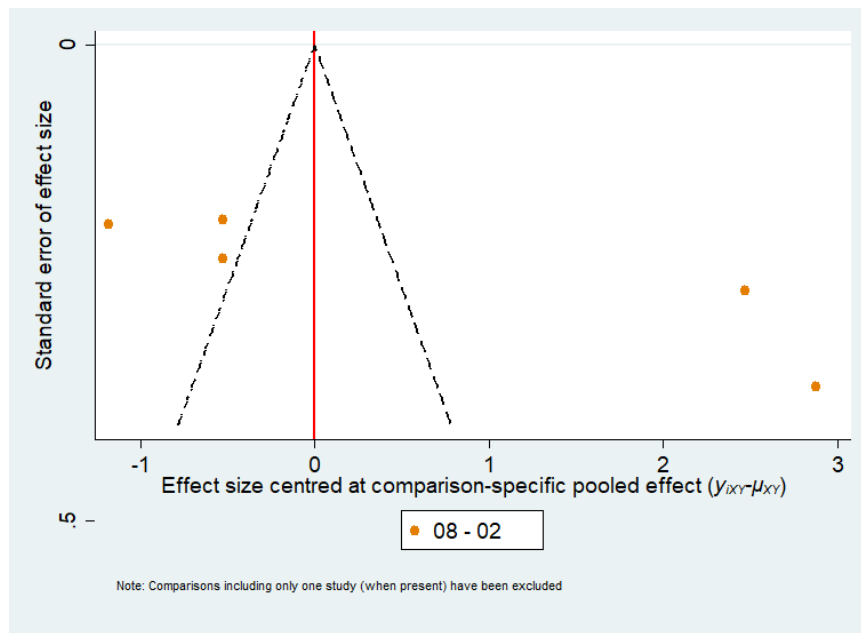

01: cognitive behavioural therapy, 02: cognitive behavioural therapy delivered with physiotherapy care, 03: combined psychological approaches, 04: combined psychological approaches delivered with physiotherapy care, 05: counselling, 06: general practitioner care, 07: no intervention, 08: physiotherapy care, 09: pain education, 10: usual care.

**Supplementary Figure 11. Pain intensity at post-intervention**

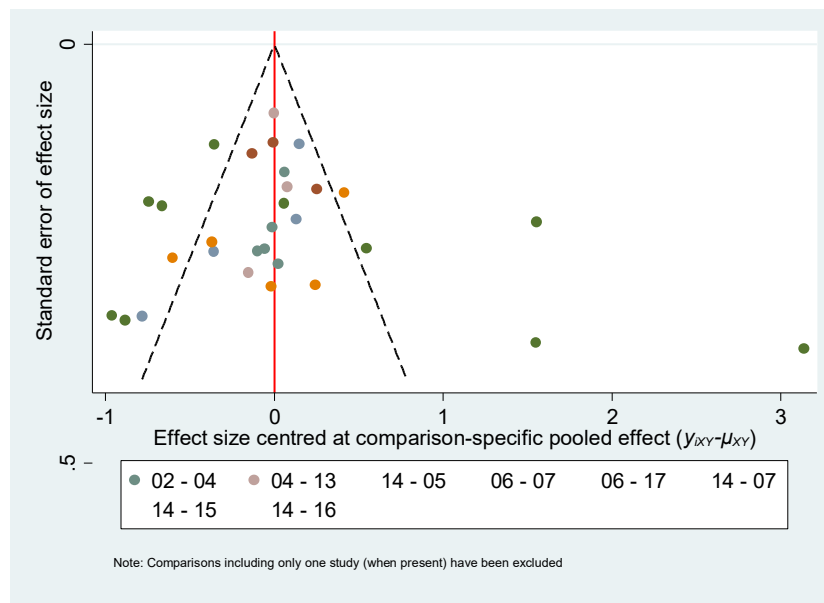

01: advice, 02: behavioural therapy, 03: behavioural therapy delivered with physiotherapy care, 04: cognitive behavioural therapy, 05: cognitive behavioural therapy delivered with physiotherapy care, 06: combined psychological approaches, 07: combined psychological approaches delivered with physiotherapy care, 08: counselling, 09: counselling delivered with physiotherapy care, 10: general practitioner care, 11: mindfulness, 12: mindfulness delivered with physiotherapy care, 13: no intervention, 14: physiotherapy care, 15: pain education, 16: pain education delivered with physiotherapy care, 17: usual care.

**Supplementary Figure 12. Pain intensity at short-term treatment sustainability**

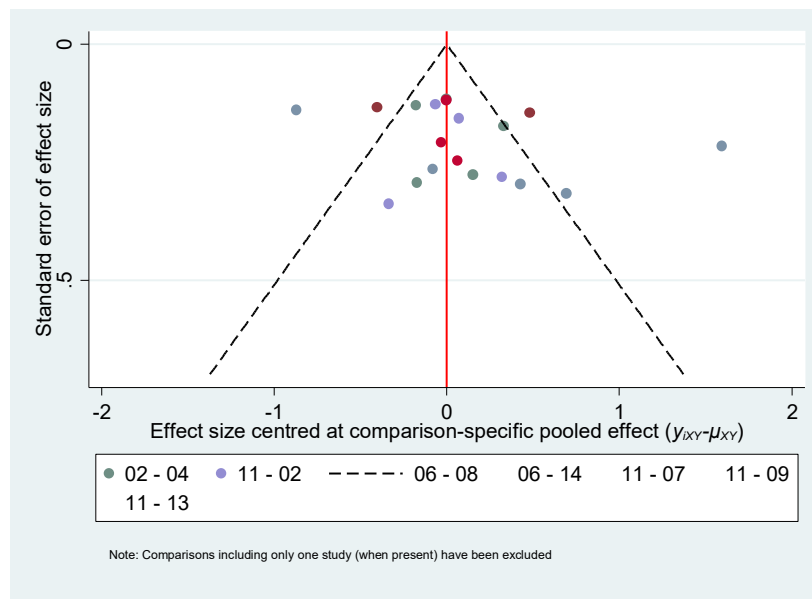

01: advice, 02: behavioural therapy, 03: behavioural therapy delivered with physiotherapy care, 04: cognitive behavioural therapy, 05: cognitive behavioural therapy delivered with physiotherapy care, 06: combined psychological approaches, 07: combined psychological approaches delivered with physiotherapy care, 08: general practitioner care, 09: mindfulness delivered with physiotherapy care, 10: no intervention, 11: physiotherapy care, 12: pain education, 13: pain education delivered with physiotherapy care, 14: usual care.

**Supplementary Figure 13. Pain intensity at mid-term treatment sustainability**

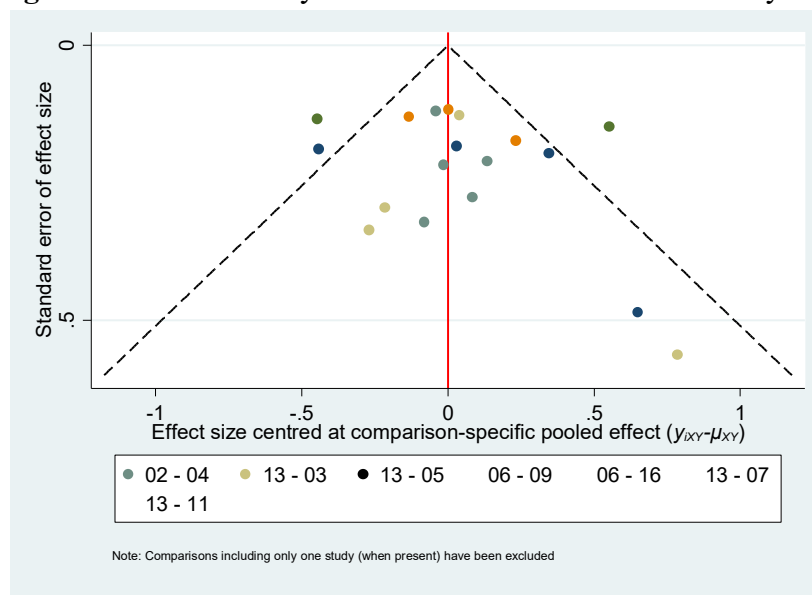

01: advice, 02: behavioural therapy, 03: behavioural therapy delivered with physiotherapy care, 04: cognitive behavioural therapy, 05: cognitive behavioural therapy delivered with physiotherapy care, 06: combined psychological approaches, 07: combined psychological approaches delivered with physiotherapy care, 08: counselling, 09: general practitioner care, 10: mindfulness, 11: mindfulness delivered with physiotherapy care, 12: no intervention, 13: physiotherapy care, 14: pain education, 15: pain education delivered with physiotherapy care, 16: usual care.

**Supplementary Figure 14.** Pain intensity at long-term treatment sustainability

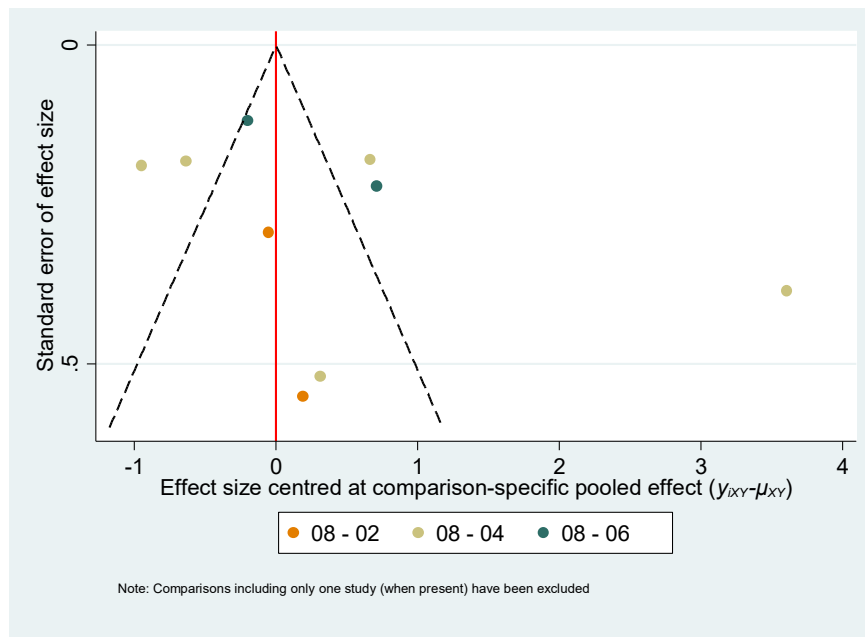

01: behavioural therapy, 02: behavioural therapy delivered with physiotherapy care, 03: cognitive behavioural therapy, 04: cognitive behavioural therapy delivered with physiotherapy care, 05: combined psychological approaches, 06: combined psychological approaches delivered with physiotherapy care, 07: general practitioner care, 08: physiotherapy care, 09: pain education, 10: usual care.

## Supplementary N. Sensitivity analyses for physical function and pain intensity

**Supplementary Table 14.1** Physical function at post-intervention, excluding studies with high risk of bias

|                            |                                        |                        |                        |                        |                            |                        |                        |                        |                        |                        |                        |                        |                        |                        |                        |                       |
|----------------------------|----------------------------------------|------------------------|------------------------|------------------------|----------------------------|------------------------|------------------------|------------------------|------------------------|------------------------|------------------------|------------------------|------------------------|------------------------|------------------------|-----------------------|
| PC<br>(reference)          | <b>1.26</b><br>(0.72,1.81)             | -0.03 (-<br>0.74,0.67) |                        |                        | <b>0.78</b><br>(0.14,1.42) |                        | -0.17 (-<br>1.57,1.23) | 0.13 (-<br>1.28,1.54)  |                        |                        | 0.20 (-<br>0.85,1.24)  |                        |                        | -0.18 (-<br>1.57,1.22) | 0.26 (-<br>1.26,1.77)  | 0.16 (-<br>1.21,1.52) |
| <b>1.09</b><br>(0.62,1.57) | CBT+PC                                 | -0.68 (-<br>2.08,0.71) |                        | -0.04 (-<br>1.46,1.38) | -0.39 (-<br>1.84,1.05)     |                        |                        | 0.12 (-<br>1.25,1.48)  |                        |                        |                        |                        |                        |                        |                        |                       |
| 0.23 (-<br>0.31,0.77)      | <b>-0.87</b> (-<br><b>1.52,-0.22</b> ) | CP+PC                  | -0.03 (-<br>0.85,0.79) |                        |                            |                        |                        |                        |                        |                        | -0.14 (-<br>1.62,1.33) | -0.38 (-<br>1.76,0.99) |                        |                        |                        |                       |
| 0.37 (-<br>0.31,1.05)      | -0.72 (-<br>1.49,0.04)                 | 0.14 (-<br>0.49,0.78)  | CP                     | -0.74 (-<br>2.30,0.81) |                            |                        | -0.21 (-<br>1.01,0.60) |                        |                        |                        |                        | -0.36 (-<br>1.78,1.06) | -0.14 (-<br>1.58,1.30) |                        |                        |                       |
| 0.32 (-<br>0.56,1.20)      | -0.77 (-<br>1.65,0.11)                 | 0.16 (-<br>0.84,1.03)  | -0.05 (-<br>0.94,0.84) | No<br>intervention     |                            |                        |                        | 0.16 (-<br>0.83,1.14)  |                        |                        |                        |                        |                        |                        |                        |                       |
| <b>0.63</b><br>(0.07,1.20) | -0.46 (-<br>1.15,0.22)                 | 0.40 (-<br>0.37,1.18)  | 0.26 (-<br>0.61,1.14)  | 0.31 (-<br>0.72,1.34)  | PE+PC                      |                        |                        |                        |                        |                        |                        |                        |                        |                        |                        | 1.06 (-<br>0.33,2.44) |
| 0.39 (-<br>0.73,1.50)      | -0.71 (-<br>1.86,0.45)                 | 0.16 (-<br>0.99,1.31)  | 0.02 (-<br>1.09,1.13)  | 0.07 (-<br>1.15,1.28)  | -0.25 (-<br>1.49,0.99)     | Mindfulness            | -0.37 (-<br>1.76,1.02) | -0.01 (-<br>1.40,1.38) | -0.30 (-<br>1.68,1.09) |                        |                        |                        |                        |                        |                        |                       |
| 0.08 (-<br>0.70,0.85)      | <b>-1.02</b> (-<br><b>1.87,-0.17</b> ) | -0.15 (-<br>0.96,0.65) | -0.29 (-<br>0.95,0.36) | -0.24 (-<br>1.22,0.73) | -0.56 (-<br>1.51,0.40)     | -0.31 (-<br>1.38,0.75) | Usual care             | 0.36 (-<br>1.03,1.75)  |                        |                        |                        |                        |                        | -0.20 (-<br>1.56,1.16) | -0.01 (-<br>1.41,1.39) |                       |
| 0.41 (-<br>0.32,1.14)      | -0.68 (-<br>1.45,0.09)                 | 0.18 (-<br>0.62,0.99)  | 0.04 (-<br>0.73,0.81)  | 0.09 (-<br>0.68,0.87)  | -0.22 (-<br>1.13,0.69)     | 0.02 (-<br>0.99,1.04)  | 0.34 (-<br>0.46,1.13)  | CBT                    | -0.04 (-<br>1.43,1.34) |                        |                        | -0.06 (-<br>1.45,1.33) |                        |                        | -0.33 (-<br>1.76,1.10) |                       |
| 0.03 (-<br>0.91,0.98)      | <b>-1.06</b> (-<br><b>2.06,-0.06</b> ) | -0.19 (-<br>1.19,0.80) | -0.34 (-<br>1.32,0.64) | -0.29 (-<br>1.37,0.80) | -0.60 (-<br>1.69,0.49)     | -0.35 (-<br>1.37,0.66) | -0.04 (-<br>1.03,0.95) | -0.38 (-<br>1.24,0.48) | Advice                 |                        | 0.55 (-<br>0.91,2.00)  |                        |                        |                        | 0.00 (-<br>1.61,1.61)  |                       |
| 0.09 (-<br>1.49,1.66)      | -1.01 (-<br>2.62,0.61)                 | -0.14 (-<br>1.62,1.33) | -0.28 (-<br>1.89,1.32) | -0.23 (-<br>1.98,1.51) | -0.55 (-<br>2.21,1.12)     | -0.30 (-<br>2.17,1.57) | 0.01 (-<br>1.67,1.69)  | -0.32 (-<br>2.01,1.36) | 1.73,1.83              | BT+PC                  |                        |                        |                        |                        |                        |                       |
| 0.16 (-<br>0.51,0.84)      | <b>-0.93</b> (-<br><b>1.72,-0.15</b> ) | -0.07 (-<br>0.80,0.66) | -0.21 (-<br>0.99,0.57) | -0.16 (-<br>1.17,0.85) | -0.47 (-<br>1.35,0.40)     | -0.23 (-<br>1.40,0.95) | 0.09 (-<br>0.81,0.98)  | -0.25 (-<br>1.12,0.62) | 0.13 (-<br>0.83,1.09)  | 0.08 (-<br>1.57,1.72)  | PE                     |                        |                        |                        | 0.04 (-<br>1.36,1.44)  |                       |
| 0.29 (-<br>0.86,1.44)      | -0.80 (-<br>1.99,0.38)                 | 0.06 (-<br>1.10,1.22)  | -0.08 (-<br>1.14,0.98) | -0.03 (-<br>1.26,1.20) | -0.34 (-<br>1.61,0.93)     | -0.10 (-<br>1.49,1.30) | 0.22 (-<br>0.95,1.38)  | -0.12 (-<br>1.17,0.93) | 0.26 (-<br>1.03,1.55)  | 0.20 (-<br>1.67,2.08)  | 0.13 (-<br>1.10,1.36)  | GP care                |                        |                        |                        |                       |
| -0.12 (-<br>1.69,1.44)     | -1.22 (-<br>2.82,0.38)                 | -0.35 (-<br>1.93,1.22) | -0.50 (-<br>2.00,1.01) | -0.45 (-<br>2.12,1.22) | -0.76 (-<br>2.42,0.90)     | -0.51 (-<br>2.24,1.21) | -0.20 (-<br>1.56,1.16) | -0.54 (-<br>2.11,1.04) | -0.16 (-<br>1.84,1.52) | -0.21 (-<br>2.37,1.95) | -0.29 (-<br>1.91,1.34) | -0.42 (-<br>2.21,1.37) | Csl                    |                        |                        |                       |
| 0.01 (-<br>0.92,0.95)      | <b>-1.08</b> (-<br><b>2.08,-0.09</b> ) | -0.22 (-<br>1.22,0.79) | -0.36 (-<br>1.34,0.63) | -0.31 (-<br>1.41,0.79) | -0.62 (-<br>1.71,0.46)     | -0.38 (-<br>1.58,0.83) | -0.06 (-<br>1.03,0.90) | -0.40 (-<br>1.29,0.49) | -0.02 (-<br>1.02,0.98) | -0.08 (-<br>1.86,1.71) | -0.15 (-<br>1.20,0.89) | -0.28 (-<br>1.58,1.02) | 0.14 (-<br>1.53,1.80)  | BT                     |                        |                       |
| 0.23 (-<br>0.85,1.30)      | -0.87 (-<br>2.03,0.29)                 | -0.00 (-<br>1.16,1.15) | -0.14 (-<br>1.35,1.06) | -0.09 (-<br>1.44,1.25) | -0.41 (-<br>1.62,0.80)     | -0.16 (-<br>1.65,1.33) | 0.15 (-<br>1.12,1.42)  | -0.19 (-<br>1.44,1.06) | 0.19 (-<br>1.15,1.54)  | 0.14 (-<br>1.73,2.01)  | 0.06 (-<br>0.99,1.12)  | -0.07 (-<br>1.59,1.46) | 0.35 (-<br>1.51,2.21)  | 0.21 (-<br>1.16,1.59)  | Mind+PC                |                       |
| 0.91 (-<br>0.12,1.95)      | -0.18 (-<br>1.30,0.94)                 | 0.69 (-<br>0.48,1.85)  | 0.54 (-<br>0.69,1.78)  | 0.59 (-<br>0.76,1.95)  | 0.28 (-<br>0.76,1.32)      | 0.53 (-<br>0.99,2.04)  | 0.84 (-<br>0.45,2.13)  | 0.50 (-<br>0.76,1.77)  | 0.88 (-<br>0.52,2.28)  | 0.83 (-<br>1.05,2.71)  | 0.75 (-<br>0.48,1.99)  | 0.62 (-<br>0.92,2.17)  | 1.04 (-<br>0.84,2.92)  | 0.90 (-<br>0.49,2.30)  | 0.69 (-<br>0.80,2.18)  | Csl+PC                |

Results are presented as standardised mean differences (SMD) and 95% confidence intervals. BT: behavioural therapy, BT+PC: behavioural therapy delivered with physiotherapy care, CBT: cognitive behavioural therapy, CBT+PC: cognitive behavioural therapy delivered with physiotherapy care, CP: combined psychological approaches, CP+PC: combined psychological approaches delivered with physiotherapy care, Csl: counselling, Csl+PC: counselling delivered with physiotherapy care, GP care: general practitioner care, Mind+PC: mindfulness delivered with physiotherapy care, PC: physiotherapy care, PE: pain education, PE+PC: pain education delivered with physiotherapy care. Estimates in bold denote significance at  $p < 0.05$ . SMD values less than 0.00 favour the column-defining treatment node for the NMA results (lower left triangle) and the row-defining treatment nodes for the pairwise meta-analysis results (upper right triangle).

**Supplementary Table 14.2** Physical function at post-intervention, only including studies using intention-to-treatment analysis

|                         |                    |                         |                         |                    |                    |                         |                    |                            |                    |                    |                    |                    |                    |                    |        |
|-------------------------|--------------------|-------------------------|-------------------------|--------------------|--------------------|-------------------------|--------------------|----------------------------|--------------------|--------------------|--------------------|--------------------|--------------------|--------------------|--------|
| PC (reference)          |                    |                         | <b>0.87</b> (0.07,1.66) | 0.13 (-1.20,1.45)  |                    | -0.17 (-1.48,1.14)      |                    | <b>1.47</b> (0.91,2.03)    | 0.14 (-0.62,0.90)  |                    | 0.92 (-0.43,2.27)  |                    | -0.18 (-1.49,1.13) | 0.26 (-1.19,1.71)  |        |
| 0.58 (-0.10,1.25)       | CP                 | -0.74 (-2.23,0.74)      |                         |                    |                    | -0.21 (-0.97,0.55)      |                    |                            | 0.03 (-0.75,0.81)  |                    | -0.36 (-1.70,0.99) | -0.14 (-1.51,1.23) |                    |                    |        |
| 0.48 (-0.32,1.28)       | -0.10 (-0.90,0.71) | No intervention         |                         | 0.21 (-0.56,0.99)  |                    |                         |                    | 0.04 (-1.30,1.38)          |                    |                    |                    |                    | -0.02 (-1.43,1.38) |                    |        |
| <b>0.87</b> (0.19,1.56) | 0.30 (-0.64,1.24)  | 0.39 (-0.63,1.42)       | PE+PC                   |                    |                    |                         |                    | 0.39 (-0.98,1.77)          |                    |                    |                    |                    |                    |                    |        |
| 0.65 (-0.07,1.36)       | 0.07 (-0.67,0.81)  | 0.17 (-0.48,0.81)       | -0.23 (-1.19,0.74)      | CBT                | 0.01 (-1.31,1.33)  | -0.36 (-1.68,0.96)      | -0.04 (-1.37,1.28) | -0.12 (-1.41,1.17)         |                    |                    |                    | -0.06 (-1.38,1.25) | -0.35 (-1.32,0.62) |                    |        |
| 0.72 (-0.43,1.86)       | 0.14 (-0.98,1.27)  | 0.24 (-0.91,1.38)       | -0.16 (-1.47,1.16)      | 0.07 (-0.92,1.06)  | Mindfulness        | -0.37 (-1.69,0.95)      | -0.30 (-1.61,1.02) |                            |                    |                    |                    |                    |                    |                    |        |
| 0.28 (-0.48,1.03)       | -0.30 (-0.92,0.33) | -0.20 (-1.06,0.66)      | -0.60 (-1.60,0.41)      | -0.37 (-1.12,0.38) | -0.44 (-1.50,0.62) | Usual care              |                    |                            |                    |                    |                    |                    | -0.01 (-1.33,1.32) |                    |        |
| 0.51 (-0.71,1.74)       | -0.06 (-1.29,1.16) | 0.03 (-1.17,1.24)       | -0.36 (-1.75,1.02)      | -0.14 (-1.17,0.90) | -0.21 (-1.24,0.83) | 0.23 (-0.96,1.43)       | Advice             |                            |                    |                    |                    |                    |                    |                    |        |
| <b>1.29</b> (0.82,1.77) | 0.72 (-0.02,1.46)  | <b>0.81</b> (0.01,1.62) | 0.42 (-0.34,1.18)       | 0.65 (-0.10,1.39)  | 0.58 (-0.60,1.75)  | <b>1.02</b> (0.20,1.84) | 0.78 (-0.46,2.03)  | CBT+PC                     | -0.68 (-2.01,0.64) |                    |                    |                    |                    |                    |        |
| 0.45 (-0.11,1.01)       | -0.12 (-0.73,0.49) | -0.03 (-0.89,0.83)      | -0.42 (-1.29,0.45)      | -0.20 (-0.99,0.60) | -0.27 (-1.45,0.91) | 0.17 (-0.60,0.95)       | -0.06 (-1.33,1.20) | <b>-0.84</b> (-1.50,-0.19) | CP+PC              | -0.14 (-1.55,1.26) | -0.38 (-1.69,0.92) |                    |                    |                    |        |
| 0.31 (-1.21,1.82)       | -0.27 (-1.80,1.27) | -0.17 (-1.82,1.48)      | -0.57 (-2.22,1.09)      | -0.34 (-1.95,1.28) | -0.41 (-2.25,1.43) | 0.03 (-1.58,1.64)       | -0.20 (-2.09,1.69) | -0.99 (-2.54,0.57)         | -0.14 (-1.55,1.26) | BT+PC              |                    |                    |                    |                    |        |
| 0.37 (-0.41,1.14)       | -0.21 (-1.03,0.61) | -0.11 (-1.14,0.91)      | -0.51 (-1.53,0.52)      | -0.28 (-1.25,0.68) | -0.35 (-1.66,0.95) | 0.09 (-0.86,1.04)       | -0.15 (-1.53,1.23) | <b>-0.93</b> (-1.80,-0.06) | -0.09 (-0.87,0.70) | 0.06 (-1.55,1.67)  | PE                 |                    |                    | 0.04 (-1.29,1.36)  |        |
| 0.51 (-0.59,1.61)       | -0.06 (-1.07,0.94) | 0.03 (-1.09,1.15)       | -0.36 (-1.64,0.92)      | -0.13 (-1.13,0.86) | -0.20 (-1.56,1.15) | 0.24 (-0.86,1.33)       | 0.00 (-1.41,1.42)  | -0.78 (-1.91,0.35)         | 0.06 (-1.05,1.17)  | 0.20 (-1.59,2.00)  | 0.15 (-1.09,1.39)  | GP care            |                    |                    |        |
| 0.23 (-0.63,1.09)       | -0.34 (-1.25,0.56) | -0.25 (-1.11,0.62)      | -0.64 (-1.73,0.44)      | -0.42 (-1.17,0.34) | -0.49 (-1.68,0.71) | -0.05 (-0.93,0.84)      | -0.28 (-1.54,0.98) | <b>-1.06</b> (-1.97,-0.15) | -0.22 (-1.16,0.72) | -0.08 (-1.77,1.61) | -0.13 (-1.22,0.95) | -0.28 (-1.47,0.91) | BT                 |                    |        |
| 0.34 (-0.71,1.39)       | -0.24 (-1.40,0.92) | -0.14 (-1.42,1.13)      | -0.54 (-1.79,0.71)      | -0.31 (-1.54,0.92) | -0.38 (-1.89,1.13) | 0.06 (-1.17,1.29)       | -0.17 (-1.75,1.40) | -0.96 (-2.09,0.18)         | -0.11 (-1.23,1.00) | 0.03 (-1.77,1.82)  | -0.03 (-1.05,0.99) | -0.18 (-1.65,1.29) | 0.11 (-1.22,1.43)  | Mind+PC            |        |
| 0.16 (-1.17,1.49)       | -0.42 (-1.91,1.07) | -0.32 (-1.87,1.23)      | -0.72 (-2.21,0.78)      | -0.49 (-2.00,1.02) | -0.56 (-2.32,1.19) | -0.12 (-1.65,1.41)      | -0.36 (-2.16,1.45) | -1.14 (-2.55,0.27)         | -0.29 (-1.74,1.15) | -0.15 (-2.17,1.86) | -0.21 (-1.75,1.33) | -0.36 (-2.08,1.37) | -0.07 (-1.66,1.51) | -0.18 (-1.87,1.51) | Csl+PC |

Results are presented as standardised mean differences (SMD) and 95% confidence intervals. BT: behavioural therapy, BT+PC: behavioural therapy delivered with physiotherapy care, CBT: cognitive behavioural therapy, CBT+PC: cognitive behavioural therapy delivered with physiotherapy care, CP: combined psychological approaches, CP+PC: combined psychological approaches delivered with physiotherapy care, Csl+PC: counselling delivered with physiotherapy care, GP care: general practitioner care, Mind+PC: mindfulness delivered with physiotherapy care, PC: physiotherapy care, PE: pain education, PE+PC: pain education delivered with physiotherapy care. Estimates in bold denote significance at  $p < 0.05$ . SMD values less than 0.00 favour the column-defining treatment node for the NMA results (lower left triangle) and the row-defining treatment nodes for the pairwise meta-analysis results (upper right triangle).



**Supplementary Table 14.3** Physical function at post-intervention, excluding studies published prior to year 1995

|                                   |                                 |                        |                        |                        |                        |                        |                        |                        |                        |                        |                        |                        |                       |                       |                       |        |  |  |  |
|-----------------------------------|---------------------------------|------------------------|------------------------|------------------------|------------------------|------------------------|------------------------|------------------------|------------------------|------------------------|------------------------|------------------------|-----------------------|-----------------------|-----------------------|--------|--|--|--|
| PC<br>(reference)                 |                                 |                        |                        |                        |                        |                        |                        |                        |                        |                        |                        |                        |                       |                       |                       |        |  |  |  |
| <b>1.09</b><br><b>(0.63,1.55)</b> | CBT+PC                          |                        |                        |                        |                        |                        |                        |                        |                        |                        |                        |                        |                       |                       |                       |        |  |  |  |
| 0.23 (-<br>0.31,0.76)             | <b>-0.86 (-<br/>1.50,-0.22)</b> | CP+PC                  |                        |                        |                        |                        |                        |                        |                        |                        |                        |                        |                       |                       |                       |        |  |  |  |
| 0.37 (-<br>0.31,1.04)             | -0.72 (-<br>1.47,0.03)          | 0.14 (-<br>0.49,0.76)  | CP                     |                        |                        |                        |                        |                        |                        |                        |                        |                        |                       |                       |                       |        |  |  |  |
| 0.26 (-<br>0.54,1.07)             | <b>-0.82 (-<br/>1.64,-0.01)</b> | 0.04 (-<br>0.83,0.90)  | -0.10 (-<br>0.93,0.72) | No<br>intervention     |                        |                        |                        |                        |                        |                        |                        |                        |                       |                       |                       |        |  |  |  |
| <b>0.63</b><br><b>(0.08,1.19)</b> | -0.46 (-<br>1.13,0.22)          | 0.40 (-<br>0.36,1.17)  | 0.27 (-<br>0.60,1.13)  | 0.37 (-<br>0.59,1.33)  | PE+PC                  |                        |                        |                        |                        |                        |                        |                        |                       |                       |                       |        |  |  |  |
| 0.40 (-<br>0.71,1.50)             | -0.69 (-<br>1.84,0.46)          | 0.17 (-<br>0.97,1.31)  | 0.03 (-<br>1.07,1.13)  | 0.13 (-<br>1.02,1.29)  | -0.24 (-<br>1.47,1.00) | Mindfulness            |                        |                        |                        |                        |                        |                        |                       |                       |                       |        |  |  |  |
| 0.08 (-<br>0.68,0.85)             | -1.01 (-<br>1.84,-0.17)         | -0.15 (-<br>0.94,0.64) | -0.28 (-<br>0.93,0.36) | -0.18 (-<br>1.07,0.71) | -0.55 (-<br>1.49,0.39) | -0.32 (-<br>1.38,0.75) | Usual care             |                        |                        |                        |                        |                        |                       |                       |                       |        |  |  |  |
| 0.42 (-<br>0.28,1.13)             | -0.67 (-<br>1.41,0.08)          | 0.19 (-<br>0.59,0.97)  | 0.05 (-<br>0.69,0.80)  | 0.16 (-<br>0.51,0.82)  | -0.21 (-<br>1.10,0.67) | 0.02 (-<br>0.99,1.03)  | 0.34 (-<br>0.43,1.11)  | CBT                    |                        |                        |                        |                        |                       |                       |                       |        |  |  |  |
| 0.05 (-<br>0.96,1.06)             | -1.04 (-<br>2.10,0.02)          | -0.18 (-<br>1.23,0.87) | -0.32 (-<br>1.36,0.72) | -0.22 (-<br>1.30,0.87) | -0.59 (-<br>1.73,0.56) | -0.35 (-<br>1.37,0.67) | -0.03 (-<br>1.09,1.02) | -0.37 (-<br>1.30,0.55) | Advice                 |                        |                        |                        |                       |                       |                       |        |  |  |  |
| 0.09 (-<br>1.47,1.64)             | -1.00 (-<br>2.59,0.59)          | -0.14 (-<br>1.60,1.31) | -0.28 (-<br>1.87,1.30) | -0.18 (-<br>1.87,1.52) | -0.55 (-<br>2.19,1.10) | -0.31 (-<br>2.16,1.54) | 0.00 (-<br>1.65,1.66)  | -0.33 (-<br>1.99,1.32) | 0.04 (-<br>1.76,1.83)  | BT+PC                  |                        |                        |                       |                       |                       |        |  |  |  |
| 0.16 (-<br>0.51,0.83)             | <b>-0.92 (-<br/>1.70,-0.15)</b> | -0.06 (-<br>0.78,0.66) | -0.20 (-<br>0.97,0.57) | -0.10 (-<br>1.05,0.84) | -0.47 (-<br>1.33,0.39) | -0.23 (-<br>1.39,0.92) | 0.08 (-<br>0.80,0.97)  | -0.26 (-<br>1.10,0.59) | 0.12 (-<br>0.88,1.11)  | 0.08 (-<br>1.55,1.70)  | PE                     |                        |                       |                       |                       |        |  |  |  |
| 0.29 (-<br>0.83,1.42)             | -0.79 (-<br>1.96,0.37)          | 0.07 (-<br>1.07,1.21)  | -0.07 (-<br>1.11,0.97) | 0.03 (-<br>1.13,1.19)  | -0.34 (-<br>1.59,0.91) | -0.10 (-<br>1.49,1.28) | 0.21 (-<br>0.93,1.35)  | -0.13 (-<br>1.16,0.90) | 0.25 (-<br>1.08,1.57)  | 0.21 (-<br>1.64,2.06)  | 0.13 (-<br>1.08,1.34)  | GP care                |                       |                       |                       |        |  |  |  |
| -0.12 (-<br>1.66,1.42)            | -1.21 (-<br>2.78,0.37)          | -0.35 (-<br>1.90,1.20) | -0.49 (-<br>1.97,1.00) | -0.38 (-<br>1.99,1.22) | -0.75 (-<br>2.38,0.88) | -0.52 (-<br>2.22,1.19) | -0.20 (-<br>1.54,1.13) | -0.54 (-<br>2.08,1.00) | -0.17 (-<br>1.87,1.54) | -0.21 (-<br>2.33,1.92) | -0.28 (-<br>1.89,1.32) | -0.41 (-<br>2.17,1.34) | Csl                   |                       |                       |        |  |  |  |
| 0.06 (-<br>0.82,0.94)             | <b>-1.03 (-<br/>1.96,-0.10)</b> | -0.17 (-<br>1.12,0.78) | -0.31 (-<br>1.24,0.62) | -0.21 (-<br>1.11,0.69) | -0.58 (-<br>1.61,0.45) | -0.34 (-<br>1.55,0.87) | -0.03 (-<br>0.94,0.89) | -0.36 (-<br>1.15,0.42) | 0.01 (-<br>1.14,1.16)  | -0.03 (-<br>1.77,1.71) | -0.11 (-<br>1.13,0.91) | -0.24 (-<br>1.47,1.00) | 0.18 (-<br>1.44,1.80) | BT                    |                       |        |  |  |  |
| 0.23 (-<br>0.83,1.29)             | -0.86 (-<br>2.00,0.28)          | -0.00 (-<br>1.14,1.14) | -0.14 (-<br>1.33,1.05) | -0.04 (-<br>1.33,1.25) | -0.41 (-<br>1.60,0.79) | -0.17 (-<br>1.64,1.30) | 0.15 (-<br>1.11,1.40)  | -0.19 (-<br>1.42,1.03) | 0.18 (-<br>1.19,1.55)  | 0.14 (-<br>1.71,1.99)  | 0.06 (-<br>0.98,1.10)  | -0.07 (-<br>1.57,1.43) | 0.35 (-<br>1.48,2.18) | 0.17 (-<br>1.17,1.51) | Mind+PC               |        |  |  |  |
| 0.91 (-<br>0.11,1.93)             | -0.17 (-<br>1.28,0.93)          | 0.69 (-<br>0.46,1.84)  | 0.55 (-<br>0.67,1.77)  | 0.65 (-<br>0.64,1.94)  | 0.28 (-<br>0.74,1.30)  | 0.52 (-<br>0.99,2.02)  | 0.83 (-<br>0.44,2.10)  | 0.49 (-<br>0.74,1.73)  | 0.87 (-<br>0.57,2.30)  | 0.83 (-<br>1.03,2.68)  | 0.75 (-<br>0.47,1.97)  | 0.62 (-<br>0.90,2.14)  | 1.03 (-<br>0.81,2.88) | 0.86 (-<br>0.49,2.20) | 0.69 (-<br>0.78,2.16) | Csl+PC |  |  |  |

Results are presented as standardised mean differences (SMD) and 95% confidence intervals. BT: behavioural therapy, BT+PC: behavioural therapy delivered with physiotherapy care, CBT: cognitive behavioural therapy, CBT+PC: cognitive behavioural therapy delivered with physiotherapy care, CP: combined psychological approaches, CP+PC combined psychological approaches delivered with physiotherapy care, Csl: counselling, Csl+PC: counselling delivered with physiotherapy care, GP care: general practitioner care, Mind+PC: mindfulness delivered with physiotherapy care, PC: physiotherapy care, PE: pain education, PE+PC: pain education delivered with physiotherapy care. Estimates in bold denote significance at  $p < 0.05$ . SMD values less than 0.00 favour the column-defining treatment node for the NMA results (lower left triangle) and the row-defining treatment nodes for the pairwise meta-analysis results (upper right triangle).

**Supplementary Table 14.4** Physical function at post-intervention, excluding studies published prior to year 2000

|                            |                                        |                        |                        |                        |                            |                        |                        |                        |                        |                        |                        |                        |                        |                        |                        |                       |
|----------------------------|----------------------------------------|------------------------|------------------------|------------------------|----------------------------|------------------------|------------------------|------------------------|------------------------|------------------------|------------------------|------------------------|------------------------|------------------------|------------------------|-----------------------|
| PC<br>(reference)          | <b>1.26</b><br>(0.72,1.81)             | -0.14 (-<br>0.96,0.67) |                        |                        | <b>0.78</b><br>(0.14,1.42) | 0.13 (-<br>1.29,1.54)  |                        | -0.17 (-<br>1.57,1.23) |                        |                        | 0.20 (-<br>0.85,1.24)  |                        |                        | -0.18 (-<br>1.57,1.22) | 0.26 (-<br>1.26,1.77)  | 0.16 (-<br>1.21,1.53) |
| <b>1.09</b><br>(0.62,1.56) | CBT+PC                                 | -0.68 (-<br>2.08,0.71) |                        | -0.04 (-<br>1.46,1.38) | -0.39 (-<br>1.84,1.05)     | 0.12 (-<br>1.26,1.49)  |                        |                        |                        |                        |                        |                        |                        |                        |                        |                       |
| 0.22 (-<br>0.37,0.81)      | <b>-0.87</b> (-<br><b>1.55,-0.19</b> ) | CP+PC                  | -0.03 (-<br>0.85,0.79) |                        |                            |                        |                        |                        |                        |                        | -0.14 (-<br>1.62,1.34) | -0.38 (-<br>1.76,1.00) |                        |                        |                        |                       |
| 0.36 (-<br>0.34,1.06)      | -0.73 (-<br>1.50,0.04)                 | 0.14 (-<br>0.50,0.79)  | CP                     | -0.74 (-<br>2.30,0.81) |                            |                        |                        | -0.21 (-<br>1.01,0.60) |                        |                        | -0.36 (-<br>1.78,1.07) | -0.14 (-<br>1.58,1.30) |                        |                        |                        |                       |
| 0.26 (-<br>0.56,1.08)      | -0.83 (-<br>1.66,0.00)                 | 0.04 (-<br>0.85,0.94)  | -0.10 (-<br>0.94,0.74) | No<br>intervention     |                            |                        | 0.21 (-<br>0.60,1.03)  |                        |                        |                        |                        |                        |                        | -0.02 (-<br>1.50,1.46) |                        |                       |
| <b>0.63</b><br>(0.07,1.20) | -0.46 (-<br>1.14,0.23)                 | 0.42 (-<br>0.39,1.22)  | 0.27 (-<br>0.62,1.16)  | 0.37 (-<br>0.61,1.35)  | PE+PC                      |                        |                        |                        |                        |                        |                        |                        |                        |                        |                        | 1.06 (-<br>0.33,2.44) |
| 0.42 (-<br>0.30,1.14)      | -0.67 (-<br>1.43,0.09)                 | 0.20 (-<br>0.61,1.01)  | 0.06 (-<br>0.70,0.82)  | 0.16 (-<br>0.52,0.83)  | -0.22 (-<br>1.12,0.69)     | CBT                    | 0.01 (-<br>1.39,1.40)  | -0.36 (-<br>1.75,1.03) | -0.04 (-<br>1.43,1.34) |                        |                        |                        | -0.06 (-<br>1.45,1.33) | -0.35 (-<br>1.37,0.67) |                        |                       |
| 0.39 (-<br>0.74,1.52)      | -0.69 (-<br>1.86,0.47)                 | 0.18 (-<br>1.00,1.35)  | 0.03 (-<br>1.09,1.16)  | 0.13 (-<br>1.04,1.31)  | -0.24 (-<br>1.49,1.02)     | 0.13 (-<br>1.05,1.00)  | Mindfulness            | -0.02 (-<br>1.76,1.03) | -0.37 (-<br>1.68,1.09) |                        |                        |                        |                        |                        |                        |                       |
| 0.08 (-<br>0.71,0.86)      | <b>-1.01</b> (-<br><b>1.86,-0.16</b> ) | -0.14 (-<br>0.95,0.67) | -0.28 (-<br>0.94,0.37) | -0.18 (-<br>1.09,0.72) | -0.56 (-<br>1.51,0.40)     | -0.34 (-<br>1.12,0.44) | -0.32 (-<br>1.40,0.77) | Usual care             |                        |                        |                        |                        |                        | -0.20 (-<br>1.56,1.16) | -0.01 (-<br>1.41,1.40) |                       |
| 0.04 (-<br>0.99,1.07)      | -1.04 (-<br>2.12,0.03)                 | -0.17 (-<br>1.25,0.91) | -0.32 (-<br>1.38,0.74) | -0.22 (-<br>1.32,0.88) | -0.59 (-<br>1.75,0.58)     | -0.37 (-<br>1.32,0.57) | -0.35 (-<br>1.39,0.69) |                        |                        | Advice                 |                        | 0.55 (-<br>0.91,2.00)  |                        |                        |                        |                       |
| 0.07 (-<br>1.52,1.67)      | -1.01 (-<br>2.64,0.61)                 | -0.14 (-<br>1.62,1.34) | -0.29 (-<br>1.90,1.33) | -0.19 (-<br>1.91,1.54) | -0.56 (-<br>2.24,1.13)     | -0.34 (-<br>2.03,1.34) | -0.32 (-<br>2.20,1.57) | -0.00 (-<br>1.69,1.68) | 0.03 (-<br>1.80,1.86)  | BT+PC                  |                        |                        |                        |                        |                        |                       |
| 0.16 (-<br>0.53,0.84)      | <b>-0.93</b> (-<br><b>1.72,-0.14</b> ) | -0.06 (-<br>0.80,0.69) | -0.20 (-<br>0.99,0.58) | -0.10 (-<br>1.06,0.86) | -0.47 (-<br>1.35,0.41)     | -0.26 (-<br>1.12,0.60) | -0.23 (-<br>1.41,0.94) | 0.08 (-<br>0.82,0.98)  | 0.12 (-<br>0.90,1.13)  | 0.08 (-<br>1.57,1.74)  | PE                     |                        |                        |                        | 0.04 (-<br>1.36,1.44)  |                       |
| 0.29 (-<br>0.86,1.44)      | -0.80 (-<br>1.98,0.39)                 | 0.07 (-<br>1.09,1.24)  | -0.07 (-<br>1.13,0.99) | 0.03 (-<br>1.16,1.21)  | -0.34 (-<br>1.62,0.93)     | -0.13 (-<br>1.18,0.92) | -0.10 (-<br>1.51,1.30) | 0.21 (-<br>0.95,1.37)  | 0.25 (-<br>1.10,1.60)  | 0.21 (-<br>1.67,2.10)  | 0.13 (-<br>1.10,1.36)  | GP care                |                        |                        |                        |                       |
| -0.12 (-<br>1.69,1.45)     | -1.21 (-<br>2.82,0.39)                 | -0.34 (-<br>1.93,1.24) | -0.48 (-<br>1.99,1.03) | -0.39 (-<br>2.02,1.25) | -0.76 (-<br>2.42,0.91)     | -0.54 (-<br>2.11,1.03) | -0.52 (-<br>2.26,1.22) | -0.20 (-<br>1.56,1.16) | -0.17 (-<br>1.90,1.57) | -0.20 (-<br>2.37,1.97) | -0.28 (-<br>1.91,1.35) | -0.41 (-<br>2.20,1.38) | Csl                    |                        |                        |                       |
| 0.05 (-<br>0.84,0.95)      | <b>-1.03</b> (-<br><b>1.98,-0.09</b> ) | -0.16 (-<br>1.14,0.82) | -0.31 (-<br>1.25,0.64) | -0.21 (-<br>1.12,0.70) | -0.58 (-<br>1.63,0.47)     | -0.36 (-<br>1.16,0.43) | -0.34 (-<br>1.57,0.89) | -0.02 (-<br>0.96,0.91) | 0.01 (-<br>1.16,1.18)  | -0.02 (-<br>1.80,1.75) | -0.11 (-<br>1.14,0.93) | -0.24 (-<br>1.49,1.02) | 0.18 (-<br>1.47,1.83)  | BT                     |                        |                       |
| 0.22 (-<br>0.85,1.30)      | -0.86 (-<br>2.02,0.30)                 | 0.01 (-<br>1.16,1.18)  | -0.14 (-<br>1.35,1.07) | -0.04 (-<br>1.35,1.27) | -0.41 (-<br>1.62,0.81)     | -0.19 (-<br>1.44,1.05) | -0.17 (-<br>1.66,1.33) | 0.15 (-<br>1.13,1.42)  | 0.18 (-<br>1.21,1.58)  | 0.15 (-<br>1.73,2.04)  | 0.07 (-<br>0.99,1.12)  | -0.06 (-<br>1.59,1.46) | 0.35 (-<br>1.52,2.21)  | 0.17 (-<br>1.19,1.53)  | Mind+PC                |                       |
| 0.91 (-<br>0.12,1.95)      | -0.17 (-<br>1.30,0.95)                 | 0.70 (-<br>0.49,1.89)  | 0.55 (-<br>0.69,1.80)  | 0.65 (-<br>0.66,1.97)  | 0.28 (-<br>0.76,1.32)      | 0.50 (-<br>0.76,1.76)  | 0.52 (-<br>1.01,2.05)  | 0.84 (-<br>0.46,2.13)  | 0.87 (-<br>0.59,2.33)  | 0.84 (-<br>1.06,2.74)  | 0.75 (-<br>0.49,2.00)  | 0.62 (-<br>0.92,2.17)  | 1.04 (-<br>0.84,2.92)  | 0.86 (-<br>0.51,2.23)  | 0.69 (-<br>0.81,2.18)  | Csl+PC                |

Results are presented as standardised mean differences (SMD) and 95% confidence intervals. BT: behavioural therapy, BT+PC: behavioural therapy delivered with physiotherapy care, CBT: cognitive behavioural therapy, CBT+PC: cognitive behavioural therapy delivered with physiotherapy care, CP: combined psychological approaches, CP+PC combined psychological approaches delivered with physiotherapy care, Csl: counselling, Csl+PC: counselling delivered with physiotherapy care, GP care: general practitioner care, Mind+PC: mindfulness delivered with physiotherapy care, PC: physiotherapy care, PE: pain education, PE+PC: pain education delivered with physiotherapy care. Estimates in bold denote significance at  $p < 0.05$ . SMD values less than 0.00 favour the column-defining treatment node for the NMA results (lower left triangle) and the row-defining treatment nodes for the pairwise meta-analysis results (upper right triangle).

**Supplementary Table 14.5** Physical function at post-intervention, excluding studies published prior to year 2005

|                                   |                                 |                        |                        |                        |                        |                        |                        |                        |                        |                        |                        |                        |                       |                       |                       |        |  |  |
|-----------------------------------|---------------------------------|------------------------|------------------------|------------------------|------------------------|------------------------|------------------------|------------------------|------------------------|------------------------|------------------------|------------------------|-----------------------|-----------------------|-----------------------|--------|--|--|
| PC<br>(reference)                 |                                 |                        |                        |                        |                        |                        |                        |                        |                        |                        |                        |                        |                       |                       |                       |        |  |  |
| <b>1.10</b><br><b>(0.62,1.58)</b> | CBT+PC                          |                        |                        |                        |                        |                        |                        |                        |                        |                        |                        |                        |                       |                       |                       |        |  |  |
| 0.21 (-<br>0.38,0.81)             | <b>-0.89 (-<br/>1.57,-0.20)</b> | CP+PC                  |                        |                        |                        |                        |                        |                        |                        |                        |                        |                        |                       |                       |                       |        |  |  |
| 0.38 (-<br>0.33,1.08)             | -0.72 (-<br>1.50,0.05)          | 0.17 (-<br>0.48,0.81)  | CP                     |                        |                        |                        |                        |                        |                        |                        |                        |                        |                       |                       |                       |        |  |  |
| 0.32 (-<br>0.52,1.16)             | -0.78 (-<br>1.62,0.07)          | 0.11 (-<br>0.80,1.02)  | -0.06 (-<br>0.91,0.80) | No<br>intervention     |                        |                        |                        |                        |                        |                        |                        |                        |                       |                       |                       |        |  |  |
| <b>0.63</b><br><b>(0.07,1.20)</b> | -0.47 (-<br>1.16,0.23)          | 0.42 (-<br>0.39,1.23)  | 0.26 (-<br>0.64,1.15)  | 0.31 (-<br>0.68,1.31)  | PE+PC                  |                        |                        |                        |                        |                        |                        |                        |                       |                       |                       |        |  |  |
| 0.57 (-<br>0.64,1.79)             | -0.53 (-<br>1.77,0.72)          | 0.36 (-<br>0.90,1.62)  | 0.20 (-<br>1.00,1.39)  | 0.25 (-<br>0.97,1.47)  | -0.06 (-<br>1.39,1.27) | Mindfulness            |                        |                        |                        |                        |                        |                        |                       |                       |                       |        |  |  |
| 0.13 (-<br>0.67,0.92)             | <b>-0.97 (-<br/>1.84,-0.11)</b> | -0.09 (-<br>0.92,0.74) | -0.25 (-<br>0.92,0.41) | -0.20 (-<br>1.11,0.72) | -0.51 (-<br>1.48,0.46) | -0.45 (-<br>1.58,0.69) | Usual care             |                        |                        |                        |                        |                        |                       |                       |                       |        |  |  |
| 0.51 (-<br>0.25,1.26)             | -0.59 (-<br>1.38,0.19)          | 0.29 (-<br>0.55,1.14)  | 0.13 (-<br>0.65,0.91)  | 0.19 (-<br>0.50,0.87)  | -0.13 (-<br>1.06,0.80) | -0.07 (-<br>1.12,0.99) | 0.38 (-<br>0.41,1.18)  | CBT                    |                        |                        |                        |                        |                       |                       |                       |        |  |  |
| 0.37 (-<br>0.93,1.67)             | -0.73 (-<br>2.05,0.59)          | 0.16 (-<br>1.19,1.51)  | -0.01 (-<br>1.31,1.29) | 0.05 (-<br>1.23,1.33)  | -0.26 (-<br>1.68,1.15) | -0.20 (-<br>1.31,0.90) | 0.24 (-<br>1.03,1.52)  | -0.14 (-<br>1.24,0.97) | Advice                 |                        |                        |                        |                       |                       |                       |        |  |  |
| 0.07 (-<br>1.53,1.67)             | -1.03 (-<br>2.67,0.61)          | -0.14 (-<br>1.63,1.34) | -0.31 (-<br>1.93,1.31) | -0.25 (-<br>1.99,1.49) | -0.56 (-<br>2.26,1.13) | -0.50 (-<br>2.45,1.45) | -0.05 (-<br>1.76,1.65) | -0.44 (-<br>2.15,1.27) | -0.30 (-<br>2.31,1.71) | BT+PC                  |                        |                        |                       |                       |                       |        |  |  |
| 0.07 (-<br>0.65,0.79)             | <b>-1.03 (-<br/>1.86,-0.20)</b> | -0.14 (-<br>0.92,0.64) | -0.31 (-<br>1.14,0.52) | -0.25 (-<br>1.28,0.78) | -0.56 (-<br>1.48,0.35) | -0.50 (-<br>1.85,0.85) | -0.05 (-<br>1.02,0.91) | -0.44 (-<br>1.41,0.53) | -0.30 (-<br>1.73,1.13) | 0.00 (-<br>1.68,1.68)  | PE                     |                        |                       |                       |                       |        |  |  |
| 0.34 (-<br>0.82,1.51)             | -0.76 (-<br>1.95,0.44)          | 0.13 (-<br>1.05,1.32)  | -0.03 (-<br>1.10,1.04) | 0.02 (-<br>1.17,1.22)  | -0.29 (-<br>1.58,1.00) | -0.23 (-<br>1.68,1.22) | 0.22 (-<br>0.95,1.39)  | -0.16 (-<br>1.22,0.90) | -0.03 (-<br>1.53,1.48) | 0.27 (-<br>1.63,2.17)  | 0.27 (-<br>1.01,1.56)  | GP care                |                       |                       |                       |        |  |  |
| -0.08 (-<br>1.66,1.51)            | -1.18 (-<br>2.79,0.44)          | -0.29 (-<br>1.89,1.31) | -0.45 (-<br>1.98,1.07) | -0.40 (-<br>2.04,1.25) | -0.71 (-<br>2.39,0.97) | -0.65 (-<br>2.43,1.13) | -0.20 (-<br>1.57,1.17) | -0.58 (-<br>2.17,1.00) | -0.45 (-<br>2.32,1.43) | -0.15 (-<br>2.33,2.04) | -0.15 (-<br>1.82,1.53) | -0.42 (-<br>2.22,1.38) | Csl                   |                       |                       |        |  |  |
| 0.11 (-<br>0.80,1.03)             | <b>-0.99 (-<br/>1.95,-0.03)</b> | -0.10 (-<br>1.10,0.90) | -0.26 (-<br>1.22,0.69) | -0.21 (-<br>1.13,0.71) | -0.52 (-<br>1.59,0.54) | -0.46 (-<br>1.73,0.81) | -0.01 (-<br>0.95,0.93) | -0.39 (-<br>1.20,0.41) | -0.26 (-<br>1.60,1.08) | 0.04 (-<br>1.75,1.83)  | 0.04 (-<br>1.06,1.14)  | -0.23 (-<br>1.50,1.03) | 0.19 (-<br>1.47,1.85) | BT                    |                       |        |  |  |
| 0.18 (-<br>0.91,1.27)             | -0.92 (-<br>2.10,0.25)          | -0.04 (-<br>1.22,1.15) | -0.20 (-<br>1.43,1.03) | -0.14 (-<br>1.49,1.20) | -0.46 (-<br>1.68,0.77) | -0.40 (-<br>2.00,1.21) | 0.05 (-<br>1.25,1.36)  | -0.33 (-<br>1.62,0.96) | -0.19 (-<br>1.86,1.48) | 0.11 (-<br>1.79,2.01)  | 0.11 (-<br>0.96,1.18)  | -0.17 (-<br>1.72,1.39) | 0.25 (-<br>1.64,2.14) | 0.06 (-<br>1.33,1.46) | Mind+PC               |        |  |  |
| 0.92 (-<br>0.13,1.96)             | -0.18 (-<br>1.32,0.95)          | 0.70 (-<br>0.50,1.90)  | 0.54 (-<br>0.72,1.79)  | 0.59 (-<br>0.74,1.93)  | 0.28 (-<br>0.76,1.33)  | 0.34 (-<br>1.26,1.94)  | 0.79 (-<br>0.52,2.10)  | 0.41 (-<br>0.88,1.69)  | 0.55 (-<br>1.12,2.21)  | 0.84 (-<br>1.06,2.75)  | 0.84 (-<br>0.42,2.11)  | 0.57 (-<br>0.99,2.13)  | 0.99 (-<br>0.90,2.89) | 0.80 (-<br>0.58,2.19) | 0.74 (-<br>0.77,2.25) | Csl+PC |  |  |

Results are presented as standardised mean differences (SMD) and 95% confidence intervals. BT: behavioural therapy, BT+PC: behavioural therapy delivered with physiotherapy care, CBT: cognitive behavioural therapy, CBT+PC: cognitive behavioural therapy delivered with physiotherapy care, CP: combined psychological approaches, CP+PC combined psychological approaches delivered with physiotherapy care, Csl: counselling, Csl+PC: counselling delivered with physiotherapy care, GP care: general practitioner care, Mind+PC: mindfulness delivered with physiotherapy care, PC: physiotherapy care, PE: pain education, PE+PC: pain education delivered with physiotherapy care. Estimates in bold denote significance at  $p < 0.05$ . SMD values less than 0.00 favour the column-defining treatment node for the NMA results (lower left triangle) and the row-defining treatment nodes for the pairwise meta-analysis results (upper right triangle).

**Supplementary Table 14.6** Physical function at post-intervention, excluding studies of patients with leg pain

|                                   |                                       |                                   |                                   |                                   |                                       |                        |                        |                        |                        |                        |                        |                        |                        |                        |                       |        |                        |                        |
|-----------------------------------|---------------------------------------|-----------------------------------|-----------------------------------|-----------------------------------|---------------------------------------|------------------------|------------------------|------------------------|------------------------|------------------------|------------------------|------------------------|------------------------|------------------------|-----------------------|--------|------------------------|------------------------|
| PC<br>(reference)                 | <b>0.62</b><br><b>(0.21,1.04)</b>     | -0.14 (-<br>0.67,0.40)            |                                   |                                   |                                       |                        |                        |                        |                        |                        |                        | 0.24 (-<br>0.43,0.91)  |                        |                        |                       |        | -0.18 (-<br>1.02,0.67) |                        |
| <b>0.56</b><br><b>(0.21,0.91)</b> | CBT+PC                                | -0.68 (-<br>1.51,0.15)            |                                   | -0.04 (-<br>0.94,0.86)            |                                       |                        |                        |                        |                        |                        |                        |                        |                        |                        |                       |        |                        |                        |
| 0.05 (-<br>0.33,0.44)             | <b>-0.51</b> (-<br><b>0.96,-0.05)</b> | CP+PC                             | 0.02 (-<br>0.63,0.67)             |                                   |                                       |                        |                        |                        |                        |                        |                        | -0.14 (-<br>1.12,0.84) | -0.38 (-<br>1.16,0.40) |                        |                       |        |                        |                        |
| 0.21 (-<br>0.27,0.70)             | -0.35 (-<br>0.89,0.20)                | 0.16 (-<br>0.30,0.62)             | CP                                | -0.74 (-<br>1.84,0.35)            |                                       |                        |                        |                        |                        |                        |                        |                        | -0.36 (-<br>1.23,0.52) | -0.14 (-<br>1.06,0.78) |                       |        |                        |                        |
| -0.02 (-<br>0.61,0.57)            | -0.58 (-<br>1.18,0.02)                | -0.07 (-<br>0.69,0.55)            | -0.23 (-<br>0.80,0.34)            | No<br>intervention                |                                       |                        |                        |                        |                        |                        |                        |                        |                        |                        |                       |        |                        | -0.02 (-<br>1.00,0.95) |
| <b>0.92</b><br><b>(0.47,1.37)</b> | 0.36 (-<br>0.22,0.93)                 | <b>0.86</b><br><b>(0.27,1.46)</b> | <b>0.70</b><br><b>(0.04,1.37)</b> | <b>0.94</b><br><b>(0.19,1.68)</b> | PE+PC                                 |                        |                        |                        |                        |                        |                        |                        |                        |                        |                       |        |                        |                        |
| 0.20 (-<br>0.52,0.92)             | -0.36 (-<br>1.12,0.40)                | 0.15 (-<br>0.59,0.89)             | -0.01 (-<br>0.69,0.67)            | 0.22 (-<br>0.51,0.95)             | -0.72 (-<br>1.57,0.13)                | Mindfulness            | -0.37 (-<br>1.20,0.46) | -0.01 (-<br>0.84,0.83) | -0.30 (-<br>1.12,0.53) |                        |                        |                        |                        |                        |                       |        |                        |                        |
| -0.08 (-<br>0.59,0.44)            | <b>-0.64</b> (-<br><b>1.22,-0.06)</b> | -0.13 (-<br>0.66,0.40)            | -0.29 (-<br>0.69,0.11)            | -0.06 (-<br>0.65,0.53)            | <b>-0.99</b> (-<br><b>1.68,-0.31)</b> | -0.28 (-<br>0.92,0.36) | Usual care             | 0.36 (-<br>0.47,1.19)  |                        |                        |                        |                        |                        |                        |                       |        | -0.20 (-<br>1.00,0.59) | -0.01 (-<br>0.85,0.84) |
| 0.16 (-<br>0.42,0.74)             | -0.40 (-<br>1.02,0.22)                | 0.11 (-<br>0.50,0.71)             | -0.05 (-<br>0.58,0.48)            | 0.18 (-<br>0.33,0.68)             | <b>-0.76</b> (-<br><b>1.49,-0.02)</b> | -0.04 (-<br>0.66,0.57) | 0.24 (-<br>0.28,0.75)  | CBT                    | -0.04 (-<br>0.86,0.78) |                        |                        |                        |                        | -0.06 (-<br>0.89,0.77) |                       |        |                        | -0.37 (-<br>1.31,0.57) |
| -0.13 (-<br>0.77,0.51)            | <b>-0.69</b> (-<br><b>1.38,-0.00)</b> | -0.18 (-<br>0.84,0.48)            | -0.34 (-<br>0.96,0.28)            | -0.11 (-<br>0.78,0.56)            | <b>-1.05</b> (-<br><b>1.83,-0.26)</b> | -0.33 (-<br>0.93,0.27) | -0.05 (-<br>0.67,0.56) | -0.29 (-<br>0.83,0.26) | Advice                 |                        |                        |                        |                        | 0.55 (-<br>0.39,1.48)  |                       |        |                        | 0.00 (-<br>1.15,1.15)  |
| -0.09 (-<br>1.14,0.97)            | -0.65 (-<br>1.73,0.43)                | -0.14 (-<br>1.12,0.84)            | -0.30 (-<br>1.39,0.78)            | -0.07 (-<br>1.23,1.09)            | -1.01 (-<br>2.15,0.14)                | -0.29 (-<br>1.52,0.94) | -0.01 (-<br>1.13,1.11) | -0.25 (-<br>1.40,0.91) | 0.04 (-<br>1.15,1.22)  | BT+PC                  |                        |                        |                        |                        |                       |        |                        |                        |
| 0.05 (-<br>0.42,0.51)             | -0.51 (-<br>1.06,0.03)                | -0.01 (-<br>0.49,0.48)            | -0.17 (-<br>0.68,0.35)            | 0.07 (-<br>0.59,0.72)             | <b>-0.87</b> (-<br><b>1.52,-0.22)</b> | -0.15 (-<br>0.89,0.58) | 0.12 (-<br>0.44,0.69)  | -0.11 (-<br>0.73,0.50) | 0.18 (-<br>0.45,0.80)  | 0.14 (-<br>0.96,1.23)  | PE                     |                        |                        |                        |                       |        |                        | 0.04 (-<br>0.78,0.86)  |
| 0.08 (-<br>0.68,0.84)             | -0.48 (-<br>1.27,0.32)                | 0.03 (-<br>0.73,0.80)             | -0.13 (-<br>0.79,0.54)            | 0.10 (-<br>0.65,0.86)             | -0.83 (-<br>1.72,0.05)                | -0.12 (-<br>0.95,0.72) | 0.16 (-<br>0.55,0.87)  | -0.07 (-<br>0.72,0.57) | 0.21 (-<br>0.58,1.00)  | 0.17 (-<br>1.07,1.42)  | 0.04 (-<br>0.74,0.82)  | GP care                |                        |                        |                       |        |                        |                        |
| -0.28 (-<br>1.23,0.67)            | -0.84 (-<br>1.82,0.14)                | -0.33 (-<br>1.29,0.63)            | -0.49 (-<br>1.38,0.40)            | -0.26 (-<br>1.25,0.73)            | <b>-1.20</b> (-<br><b>2.25,-0.15)</b> | -0.48 (-<br>1.50,0.54) | -0.20 (-<br>1.00,0.59) | -0.44 (-<br>1.39,0.51) | -0.15 (-<br>1.15,0.85) | -0.19 (-<br>1.56,1.18) | -0.33 (-<br>1.30,0.65) | -0.36 (-<br>1.43,0.70) | Csl                    |                        |                       |        |                        |                        |
| -0.13 (-<br>0.73,0.47)            | <b>-0.69</b> (-<br><b>1.34,-0.04)</b> | -0.18 (-<br>0.83,0.46)            | -0.34 (-<br>0.95,0.27)            | -0.11 (-<br>0.74,0.52)            | <b>-1.05</b> (-<br><b>1.80,-0.30)</b> | -0.33 (-<br>1.07,0.41) | -0.05 (-<br>0.64,0.53) | -0.29 (-<br>0.87,0.29) | -0.00 (-<br>0.65,0.64) | -0.04 (-<br>1.22,1.13) | -0.18 (-<br>0.84,0.49) | -0.21 (-<br>1.01,0.58) | 0.15 (-<br>0.84,1.13)  | BT                     |                       |        |                        |                        |
| 0.09 (-<br>0.86,1.03)             | -0.48 (-<br>1.46,0.51)                | 0.03 (-<br>0.92,0.98)             | -0.13 (-<br>1.09,0.84)            | 0.10 (-<br>0.94,1.15)             | -0.83 (-<br>1.87,0.21)                | -0.12 (-<br>1.21,0.98) | 0.16 (-<br>0.83,1.16)  | -0.07 (-<br>1.10,0.95) | 0.21 (-<br>0.82,1.25)  | 0.17 (-<br>1.19,1.54)  | 0.04 (-<br>0.78,0.86)  | 0.00 (-<br>1.13,1.13)  | 0.36 (-<br>0.91,1.64)  | 0.22 (-<br>0.84,1.27)  | Mind+PC               |        |                        |                        |
| 0.16 (-<br>0.71,1.02)             | -0.40 (-<br>1.34,0.53)                | 0.10 (-<br>0.85,1.05)             | -0.06 (-<br>1.05,0.94)            | 0.18 (-<br>0.88,1.23)             | -0.76 (-<br>1.74,0.22)                | -0.04 (-<br>1.17,1.08) | 0.23 (-<br>0.78,1.25)  | -0.00 (-<br>1.05,1.04) | 0.29 (-<br>0.79,1.37)  | 0.25 (-<br>1.12,1.61)  | 0.11 (-<br>0.88,1.09)  | 0.07 (-<br>1.08,1.23)  | 0.44 (-<br>0.85,1.72)  | 0.29 (-<br>0.77,1.34)  | 0.07 (-<br>1.21,1.35) | Csl+PC |                        |                        |

Results are presented as standardised mean differences (SMD) and 95% confidence intervals. BT: behavioural therapy, BT+PC: behavioural therapy delivered with physiotherapy care, CBT: cognitive behavioural therapy, CBT+PC: cognitive behavioural therapy delivered with physiotherapy care, CP+PC: combined psychological approaches delivered with physiotherapy care, Csl: counselling, Csl+PC: counselling delivered with physiotherapy care, GP care: general practitioner care, Mind+PC: mindfulness delivered with physiotherapy care, PC: physiotherapy care, PE: pain education, PE+PC: pain education delivered with physiotherapy care. Estimates in bold denote significance at  $p < 0.05$ . SMD values less than 0.00 favour the column-defining treatment node for the NMA results (lower left triangle) and the row-defining treatment nodes for the pairwise meta-analysis results (upper right triangle).

**Supplementary Table 14.7** Physical function at mid-term treatment sustainability, excluding studies involving data imputed from median and interquartile ranges

|                                   |                                 |                        |                                   |                        |                        |                                 |                        |                        |                                 |                                   |                        |                        |                       |       |
|-----------------------------------|---------------------------------|------------------------|-----------------------------------|------------------------|------------------------|---------------------------------|------------------------|------------------------|---------------------------------|-----------------------------------|------------------------|------------------------|-----------------------|-------|
| PC<br>(reference)                 |                                 |                        |                                   |                        |                        |                                 |                        |                        |                                 |                                   |                        |                        |                       |       |
| <b>0.37</b><br><b>(0.14,0.60)</b> | CBT+PC                          |                        |                                   |                        |                        |                                 |                        |                        |                                 |                                   |                        |                        |                       |       |
| 0.21 (-<br>0.24,0.65)             | -0.17 (-<br>0.60,0.26)          | Mindfulness            |                                   |                        |                        |                                 |                        |                        |                                 |                                   |                        |                        |                       |       |
| -0.12 (-<br>0.52,0.27)            | <b>-0.50 (-<br/>0.89,-0.10)</b> | -0.33 (-<br>0.72,0.07) | Usual care                        |                        |                        |                                 |                        |                        |                                 |                                   |                        |                        |                       |       |
| 0.19 (-<br>0.16,0.54)             | -0.18 (-<br>0.52,0.16)          | -0.01 (-<br>0.37,0.35) | 0.31 (-<br>0.02,0.65)             | CBT                    |                        |                                 |                        |                        |                                 |                                   |                        |                        |                       |       |
| 0.11 (-<br>0.30,0.51)             | -0.27 (-<br>0.64,0.10)          | -0.10 (-<br>0.46,0.26) | 0.23 (-<br>0.19,0.64)             | -0.09 (-<br>0.42,0.25) | Advice                 |                                 |                        |                        |                                 |                                   |                        |                        |                       |       |
| <b>0.42</b><br><b>(0.15,0.68)</b> | 0.04 (-<br>0.24,0.33)           | 0.21 (-<br>0.23,0.66)  | <b>0.54</b><br><b>(0.17,0.90)</b> | 0.22 (-<br>0.13,0.58)  | 0.31 (-<br>0.10,0.73)  | CP+PC                           |                        |                        |                                 |                                   |                        |                        |                       |       |
| 0.37 (-<br>0.04,0.79)             | -0.00 (-<br>0.45,0.45)          | 0.17 (-<br>0.40,0.74)  | 0.49 (-<br>0.02,1.01)             | 0.18 (-<br>0.32,0.68)  | 0.27 (-<br>0.27,0.81)  | -0.04 (-<br>0.43,0.34)          | PE                     |                        |                                 |                                   |                        |                        |                       |       |
| -0.02 (-<br>0.42,0.38)            | -0.39 (-<br>0.85,0.07)          | -0.22 (-<br>0.82,0.37) | 0.10 (-<br>0.46,0.67)             | -0.21 (-<br>0.74,0.32) | -0.12 (-<br>0.69,0.44) | -0.44 (-<br>0.92,0.04)          | -0.39 (-<br>0.97,0.19) | Mind+PC                |                                 |                                   |                        |                        |                       |       |
| 0.18 (-<br>0.18,0.54)             | -0.19 (-<br>0.55,0.17)          | -0.02 (-<br>0.44,0.39) | <b>0.30</b><br><b>(0.05,0.56)</b> | -0.01 (-<br>0.34,0.32) | 0.08 (-<br>0.33,0.49)  | -0.24 (-<br>0.54,0.07)          | -0.19 (-<br>0.67,0.29) | 0.20 (-<br>0.34,0.74)  | CP                              |                                   |                        |                        |                       |       |
| -0.13 (-<br>0.55,0.29)            | <b>-0.50 (-<br/>0.92,-0.08)</b> | -0.33 (-<br>0.79,0.12) | -0.01 (-<br>0.37,0.36)            | -0.32 (-<br>0.67,0.03) | -0.23 (-<br>0.68,0.22) | <b>-0.54 (-0.94,-<br/>0.15)</b> | -0.50 (-<br>1.04,0.04) | -0.11 (-<br>0.69,0.47) | <b>-0.31 (-<br/>0.61,-0.01)</b> | GP care                           |                        |                        |                       |       |
| 0.16 (-<br>0.57,0.88)             | -0.21 (-<br>0.93,0.51)          | -0.05 (-<br>0.78,0.68) | 0.28 (-<br>0.44,1.00)             | -0.03 (-<br>0.67,0.60) | 0.05 (-<br>0.66,0.77)  | -0.26 (-<br>0.99,0.47)          | -0.21 (-<br>1.02,0.59) | 0.18 (-<br>0.65,1.01)  | -0.02 (-<br>0.74,0.69)          | 0.29 (-<br>0.44,1.01)             | Csl                    |                        |                       |       |
| -0.06 (-<br>0.61,0.49)            | -0.43 (-<br>0.97,0.11)          | -0.26 (-<br>0.82,0.30) | 0.06 (-<br>0.48,0.61)             | -0.25 (-<br>0.68,0.18) | -0.16 (-<br>0.70,0.38) | -0.47 (-<br>1.03,0.08)          | -0.43 (-<br>1.09,0.23) | -0.04 (-<br>0.72,0.64) | -0.24 (-<br>0.78,0.30)          | 0.07 (-<br>0.48,0.62)             | -0.22 (-<br>0.69,0.26) | No<br>intervention     |                       |       |
| -0.18 (-<br>0.85,0.50)            | -0.55 (-<br>1.22,0.12)          | -0.38 (-<br>1.07,0.30) | -0.05 (-<br>0.73,0.62)            | -0.37 (-<br>0.95,0.21) | -0.28 (-<br>0.95,0.39) | -0.59 (-<br>1.28,0.09)          | -0.55 (-<br>1.32,0.22) | -0.16 (-<br>0.95,0.63) | -0.36 (-<br>1.03,0.31)          | -0.05 (-<br>0.73,0.63)            | -0.33 (-<br>1.20,0.53) | -0.12 (-<br>0.84,0.60) | BT                    |       |
| 0.68 (-<br>0.03,1.39)             | 0.31 (-<br>0.42,1.04)           | 0.47 (-<br>0.34,1.28)  | <b>0.80</b><br><b>(0.03,1.58)</b> | 0.49 (-<br>0.28,1.25)  | 0.57 (-<br>0.22,1.37)  | 0.26 (-<br>0.43,0.96)           | 0.31 (-<br>0.27,0.88)  | 0.70 (-<br>0.12,1.52)  | 0.50 (-<br>0.25,1.25)           | <b>0.81</b><br><b>(0.02,1.59)</b> | 0.52 (-<br>0.47,1.51)  | 0.74 (-<br>0.14,1.61)  | 0.86 (-<br>0.11,1.82) | PE+PC |

Results are presented as standardised mean differences (SMD) and 95% confidence intervals. BT: behavioural therapy, BT+PC: behavioural therapy delivered with physiotherapy care, CBT: cognitive behavioural therapy, CBT+PC: cognitive behavioural therapy delivered with physiotherapy care, CP: combined psychological approaches, CP+PC: combined psychological approaches delivered with physiotherapy care, Csl: counselling, Csl+PC: counselling delivered with physiotherapy care, GP care: general practitioner care, Mind+PC: mindfulness delivered with physiotherapy care, PC: physiotherapy care, PE: pain education, PE+PC: pain education delivered with physiotherapy care. Estimates in bold denote significance at  $p < 0.05$ . SMD values less than 0.00 favour the column-defining treatment node for the NMA results (lower left triangle) and the row-defining treatment nodes for the pairwise meta-analysis results (upper right triangle).

**Supplementary Table 14.8** Physical function at short-term treatment sustainability, removing portions of the evidence in the network to address inconsistency

|                                   |                                       |                        |                        |                        |                                       |                        |                        |                        |                        |                        |                        |                        |
|-----------------------------------|---------------------------------------|------------------------|------------------------|------------------------|---------------------------------------|------------------------|------------------------|------------------------|------------------------|------------------------|------------------------|------------------------|
| PC<br>(reference)                 |                                       |                        |                        | 0.14 (-<br>0.20,0.49)  | 0.14 (-<br>0.20,0.47)                 |                        |                        |                        | -0.02(-<br>0.49,0.46)  |                        | -0.11 (-<br>0.58,0.36) |                        |
| <b>0.85</b><br><b>(0.56,1.15)</b> | PE+PC                                 |                        |                        |                        |                                       |                        |                        |                        |                        |                        |                        |                        |
| -0.00 (-<br>0.48,0.48)            | <b>-0.86 (-</b><br><b>1.42,-0.30)</b> | Advice                 | -0.01 (-<br>0.47,0.45) |                        | 0.33 (-<br>0.18,0.83)                 |                        |                        |                        |                        |                        |                        |                        |
| 0.00 (-<br>0.51,0.52)             | <b>-0.85 (-</b><br><b>1.44,-0.26)</b> | 0.00 (-<br>0.39,0.39)  | CBT                    |                        |                                       |                        |                        | -0.27 (-<br>0.68,0.14) |                        |                        |                        |                        |
| 0.07 (-<br>0.20,0.34)             | <b>-0.78 (-</b><br><b>1.18,-0.39)</b> | 0.07 (-<br>0.41,0.55)  | 0.07 (-<br>0.44,0.58)  | CP+PC                  | <b>0.46</b><br><b>(0.08,0.85)</b>     |                        |                        | -0.13 (-<br>0.60,0.35) |                        |                        |                        | -0.26 (-<br>0.70,0.17) |
| <b>0.31</b><br><b>(0.01,0.61)</b> | <b>-0.54 (-</b><br><b>0.96,-0.13)</b> | 0.31 (-<br>0.11,0.73)  | 0.31 (-<br>0.18,0.80)  | 0.24 (-<br>0.07,0.55)  | CBT+PC                                |                        |                        |                        |                        |                        |                        |                        |
| 0.20 (-<br>0.22,0.62)             | <b>-0.66 (-</b><br><b>1.17,-0.14)</b> | 0.20 (-<br>0.44,0.84)  | 0.20 (-<br>0.47,0.86)  | 0.13 (-<br>0.37,0.62)  | -0.11 (-<br>0.63,0.40)                | Mind+PC                |                        |                        |                        |                        |                        |                        |
| 0.02 (-<br>0.32,0.36)             | <b>-0.84 (-</b><br><b>1.28,-0.39)</b> | 0.02 (-<br>0.47,0.51)  | 0.02 (-<br>0.46,0.50)  | -0.05 (-<br>0.35,0.25) | -0.29 (-<br>0.67,0.09)                | -0.18 (-<br>0.71,0.36) | CP                     | -0.26 (-<br>0.78,0.26) | -0.19 (-<br>0.45,0.07) | -0.12 (-<br>0.43,0.18) |                        | -0.16 (-<br>0.70,0.39) |
| -0.26 (-<br>0.75,0.24)            | <b>-1.11 (-</b><br><b>1.69,-0.54)</b> | -0.26 (-<br>0.72,0.21) | -0.26 (-<br>0.60,0.09) | -0.33 (-<br>0.81,0.15) | <b>-0.57 (-</b><br><b>1.06,-0.08)</b> | -0.45 (-<br>1.10,0.19) | -0.28 (-<br>0.70,0.15) | No<br>intervention     |                        |                        |                        |                        |
| -0.14 (-<br>0.48,0.20)            | <b>-0.99 (-</b><br><b>1.44,-0.54)</b> | -0.14 (-<br>0.65,0.38) | -0.14 (-<br>0.66,0.38) | -0.21 (-<br>0.55,0.13) | <b>-0.45 (-</b><br><b>0.85,-0.05)</b> | -0.33 (-<br>0.87,0.21) | -0.16 (-<br>0.39,0.08) | 0.12 (-<br>0.35,0.60)  | Usual care             |                        |                        | -0.10 (-<br>0.57,0.38) |
| -0.10 (-<br>0.56,0.35)            | <b>-0.96 (-</b><br><b>1.50,-0.42)</b> | -0.10 (-<br>0.67,0.47) | -0.10 (-<br>0.67,0.47) | -0.17 (-<br>0.60,0.26) | -0.41 (-<br>0.90,0.07)                | -0.30 (-<br>0.92,0.32) | -0.12 (-<br>0.43,0.18) | 0.16 (-<br>0.37,0.68)  | 0.03 (-<br>0.35,0.42)  | GP care                |                        |                        |
| -0.17 (-<br>0.60,0.26)            | <b>-1.03 (-</b><br><b>1.55,-0.51)</b> | -0.17 (-<br>0.78,0.44) | -0.17 (-<br>0.80,0.45) | -0.24 (-<br>0.71,0.23) | -0.48 (-<br>0.98,0.02)                | -0.37 (-<br>0.97,0.23) | -0.19 (-<br>0.65,0.27) | 0.09 (-<br>0.51,0.69)  | -0.04 (-<br>0.46,0.39) | -0.07 (-<br>0.62,0.48) | BT                     |                        |
| -0.17 (-<br>0.58,0.24)            | <b>-1.02 (-</b><br><b>1.53,-0.52)</b> | -0.17 (-<br>0.73,0.39) | -0.17 (-<br>0.74,0.40) | -0.24 (-<br>0.58,0.10) | <b>-0.48 (-</b><br><b>0.92,-0.04)</b> | -0.37 (-<br>0.95,0.22) | -0.19 (-<br>0.56,0.18) | 0.09 (-<br>0.45,0.63)  | -0.03 (-<br>0.45,0.38) | -0.07 (-<br>0.55,0.41) | 0.00 (-<br>0.54,0.55)  | PE                     |

Results are presented as standardised mean differences (SMD) and 95% confidence intervals. BT: behavioural therapy, CBT: cognitive behavioural therapy, CBT+PC: cognitive behavioural therapy delivered with physiotherapy care, CP: combined psychological approaches, CP+PC: combined psychological approaches delivered with physiotherapy care, GP care: general practitioner care, Mind+PC: mindfulness delivered with physiotherapy care, PE: pain education, PE+PC: pain education delivered with physiotherapy care, PC: physiotherapy care. Estimates in bold denote significance at  $p < 0.05$ . SMD values less than 0.00 favour the column-defining treatment node for the NMA results (lower left triangle) and the row-defining treatment nodes for the pairwise meta-analysis results (upper right triangle).

Final results of global test for inconsistency:  $\chi^2 = 1.92$ ,  $p = 0.75$ . No local inconsistency was detected in the side-splitting approach.

#### Justification:

Although we used standardised mean differences to estimate treatment effects, for physical function at short-term treatment sustainability, we examined transitivity across studies included in the analysis. We explored whether the use of different measurement scales in sides demonstrating  $p < 0.05$  from the side-splitting approach contributed to inconsistency within the network.

We examined the impact on global inconsistency tests after excluding Christiansen et al. (2010)[13] and Friedrich et al. (1998 and 2005).[18, 19] These studies contributed to sides 02 05, 02 07, 01 02 and 01 05, and utilised the Hannover ADL Questionnaire and Low Back Outcome Scale, respectively. For these measurement tools, higher scores corresponded with higher physical function/less disability. Therefore, to include them in the primary analysis, we had previously reversed the signal of the scores, since most studies utilised the Roland Morris Disability Questionnaire and Oswestry Disability questionnaire (where higher scores corresponded with worse disability/lower physical function). Removal of these studies resulted in a reduction in global inconsistency ( $\chi^2 = 10.86$ ,  $p = 0.05$ ); although, local inconsistency persisted in the side 02 07 (i.e., physiotherapy care compared with pain education).

We subsequently visually inspected possible causes of intransitivity of studies contributing to the side 02 07. We examined the impact of further excluding Gardner et al. (2019)[23] from the analysis, as the study authors assessed physical function using the Quebec Back Pain Disability Scale, whilst study authors of the other studies contributing directly to side 02 07 utilised the Roland Morris Disability Questionnaire. After further removing Gardner et al. (2019),[23] global inconsistency ( $\chi^2 = 1.92$ ,  $p = 0.75$ ) and local inconsistency were removed entirely.

As seen, statistically significant findings for comparisons with physiotherapy care remain similar to our primary analysis. Notably, the effect estimates for pain education delivered with physiotherapy care, compared with physiotherapy care, increased to a large and clinically important effect. On the other hand, effect estimates for cognitive behavioural therapy delivered with physiotherapy care, compared with physiotherapy care, reduced to a small and non-clinically important effect.

**Supplementary Table 14.9.** Physical function at mid-term treatment sustainability, removing portions of the evidence in the network to address inconsistency

|                            |                                 |                                 |                                 |                            |                            |                                 |                        |                                 |                                 |                        |                                 |                        |                                 |                       |
|----------------------------|---------------------------------|---------------------------------|---------------------------------|----------------------------|----------------------------|---------------------------------|------------------------|---------------------------------|---------------------------------|------------------------|---------------------------------|------------------------|---------------------------------|-----------------------|
| PC<br>(reference)          | <b>0.23</b><br>(0.06,0.41)      | 0.11 (-<br>0.30,0.52)           |                                 |                            |                            | <b>0.39</b><br>(0.10,0.68)      |                        |                                 |                                 |                        |                                 |                        |                                 |                       |
| <b>0.25</b><br>(0.09,0.41) | CBT+PC                          | 0.23 (-<br>0.13,0.59)           |                                 |                            | -0.37 (-<br>0.73,0.00)     |                                 |                        |                                 |                                 |                        |                                 |                        |                                 |                       |
| 0.13 (-<br>0.11,0.37)      | -0.12 (-<br>0.36,0.13)          | CBT                             | -0.01 (-<br>0.32,0.30)          | -0.30 (-<br>0.62,0.01)     | 0.03 (-<br>0.27,0.34)      |                                 |                        |                                 | -0.26 (-<br>0.57,0.05)          |                        | <b>-0.25 (-<br/>0.46,-0.04)</b> | -0.37 (-<br>0.82,0.08) |                                 |                       |
| 0.15 (-<br>0.15,0.44)      | -0.10 (-<br>0.39,0.19)          | 0.02 (-<br>0.21,0.24)           | Mindfulness                     | -0.29 (-<br>0.61,0.02)     | -0.14 (-<br>0.43,0.16)     |                                 |                        |                                 |                                 |                        |                                 |                        |                                 |                       |
| -0.15 (-<br>0.43,0.12)     | <b>-0.40 (-<br/>0.68,-0.12)</b> | <b>-0.29 (-<br/>0.50,-0.07)</b> | <b>-0.30 (-<br/>0.55,-0.05)</b> | Usual care                 |                            |                                 |                        | <b>0.30</b><br>(0.12,0.49)      |                                 |                        |                                 |                        |                                 |                       |
| 0.03 (-<br>0.24,0.31)      | -0.21 (-<br>0.47,0.04)          | -0.10 (-<br>0.31,0.12)          | -0.11 (-<br>0.33,0.10)          | 0.19 (-<br>0.08,0.46)      | Advice                     |                                 |                        |                                 |                                 |                        |                                 |                        |                                 |                       |
| <b>0.41</b><br>(0.18,0.64) | 0.17 (-<br>0.10,0.43)           | <b>0.28</b><br>(0.02,0.54)      | 0.27 (-<br>0.04,0.57)           | <b>0.57</b><br>(0.32,0.82) | <b>0.38</b><br>(0.08,0.68) | CP+PC                           |                        |                                 | <b>-0.29 (-<br/>0.53,-0.04)</b> |                        |                                 |                        | <b>-0.33 (-<br/>0.59,-0.07)</b> |                       |
| 0.02 (-<br>0.25,0.28)      | -0.23 (-<br>0.54,0.07)          | -0.11 (-<br>0.47,0.25)          | -0.13 (-<br>0.52,0.26)          | 0.17 (-<br>0.21,0.55)      | -0.02 (-<br>0.39,0.36)     | <b>-0.40 (-<br/>0.75,-0.05)</b> | Mind+PC                |                                 |                                 |                        |                                 |                        |                                 |                       |
| 0.15 (-<br>0.11,0.40)      | -0.10 (-<br>0.37,0.17)          | 0.02 (-<br>0.20,0.23)           | -0.00 (-<br>0.27,0.26)          | <b>0.30</b><br>(0.14,0.46) | 0.11 (-<br>0.16,0.39)      | <b>-0.27 (-<br/>0.47,-0.06)</b> | 0.13 (-<br>0.24,0.50)  | CP                              | <b>-0.33 (-<br/>0.56,-0.11)</b> |                        |                                 |                        |                                 |                       |
| -0.17 (-<br>0.45,0.12)     | <b>-0.41 (-<br/>0.71,-0.12)</b> | <b>-0.30 (-<br/>0.52,-0.07)</b> | <b>-0.31 (-<br/>0.60,-0.03)</b> | -0.01 (-<br>0.24,0.22)     | -0.20 (-<br>0.49,0.09)     | <b>-0.58 (-<br/>0.85,-0.31)</b> | -0.18 (-<br>0.57,0.21) | <b>-0.31 (-<br/>0.50,-0.12)</b> | GP care                         |                        |                                 |                        |                                 |                       |
| 0.10 (-<br>0.34,0.53)      | -0.15 (-<br>0.59,0.28)          | -0.03 (-<br>0.39,0.33)          | -0.05 (-<br>0.48,0.37)          | 0.25 (-<br>0.17,0.67)      | 0.06 (-<br>0.36,0.48)      | -0.32 (-<br>0.76,0.13)          | 0.08 (-<br>0.43,0.59)  | -0.05 (-<br>0.47,0.37)          | 0.26 (-<br>0.16,0.68)           | Csl                    |                                 | -0.22 (-<br>0.51,0.08) |                                 |                       |
| -0.12 (-<br>0.44,0.20)     | <b>-0.37 (-<br/>0.69,-0.05)</b> | <b>-0.25 (-<br/>0.46,-0.04)</b> | -0.27 (-<br>0.57,0.04)          | 0.03 (-<br>0.27,0.34)      | -0.15 (-<br>0.45,0.15)     | <b>-0.53 (-<br/>0.87,-0.20)</b> | -0.14 (-<br>0.55,0.28) | -0.27 (-<br>0.57,0.03)          | 0.05 (-<br>0.26,0.35)           | -0.22 (-<br>0.51,0.08) | No<br>intervention              |                        |                                 |                       |
| -0.24 (-<br>0.75,0.27)     | -0.49 (-<br>1.00,0.03)          | -0.37 (-<br>0.82,0.08)          | -0.39 (-<br>0.89,0.12)          | -0.08 (-<br>0.58,0.42)     | -0.27 (-<br>0.77,0.23)     | <b>-0.65 (-<br/>1.17,-0.13)</b> | -0.26 (-<br>0.83,0.32) | -0.39 (-<br>0.89,0.11)          | -0.07 (-<br>0.57,0.43)          | -0.33 (-<br>0.91,0.24) | -0.12 (-<br>0.61,0.38)          | BT                     |                                 |                       |
| 0.08 (-<br>0.27,0.43)      | -0.17 (-<br>0.54,0.20)          | -0.05 (-<br>0.42,0.32)          | -0.07 (-<br>0.47,0.33)          | 0.24 (-<br>0.12,0.60)      | 0.05 (-<br>0.35,0.45)      | <b>-0.33 (-<br/>0.59,-0.07)</b> | 0.06 (-<br>0.37,0.50)  | -0.07 (-<br>0.40,0.27)          | 0.25 (-<br>0.12,0.62)           | -0.01 (-<br>0.53,0.50) | 0.20 (-<br>0.22,0.63)           | 0.32 (-<br>0.26,0.90)  | PE                              | 0.31 (-<br>0.13,0.75) |
| 0.39 (-<br>0.17,0.95)      | 0.14 (-<br>0.43,0.72)           | 0.26 (-<br>0.32,0.83)           | 0.24 (-<br>0.35,0.84)           | 0.54 (-<br>0.03,1.11)      | 0.36 (-<br>0.24,0.95)      | -0.02 (-<br>0.54,0.49)          | 0.37 (-<br>0.25,0.99)  | 0.24 (-<br>0.31,0.79)           | 0.55 (-<br>0.02,1.13)           | 0.29 (-<br>0.38,0.97)  | 0.51 (-<br>0.10,1.12)           | 0.63 (-<br>0.10,1.36)  | 0.31 (-<br>0.13,0.75)           | PE+PC                 |

Results are presented as standardised mean differences (SMD) and 95% confidence intervals. BT: behavioural therapy, BT+PC: behavioural therapy delivered with physiotherapy care, CBT: cognitive behavioural therapy, CBT+PC: cognitive behavioural therapy delivered with physiotherapy care, CP: combined psychological approaches, CP+PC: combined psychological approaches delivered with physiotherapy care, GP care: general practitioner care, Mind+PC: mindfulness delivered with physiotherapy care, PC: physiotherapy care, PE: pain education, PE+PC: pain education delivered with physiotherapy care. Estimates in bold denote significance at  $p < 0.05$ . SMD values less than 0.00 favour the column-defining treatment node for the NMA results (lower left triangle) and the row-defining treatment nodes for the pairwise meta-analysis results (upper right triangle).

Final results of global test for inconsistency:  $\chi^2 = 6.88$ ,  $p = 0.22$ . No local inconsistency was detected in the side-splitting approach.



#### Justification:

To maintain consistency with the sensitivity analysis performed to remove inconsistency for physical function at short-term treatment sustainability, we also removed Christiansen et al. (2010),[13] Friedrich et al. (1998 and 2005),[18, 19] and Gardner et al. (2019)[23] in the sensitivity analysis of physical function at mid-term treatment sustainability. However, global inconsistency persisted within the network ( $\chi^2 = 26.79$ ,  $p < 0.001$ ).

We then explored the sides which continued to demonstrate  $p < 0.05$  from the side-splitting approach, which were 02 08 (physiotherapy care compared with pain education), 01 02 (cognitive behavioural therapy delivered with physiotherapy care compared with physiotherapy care), 01 05 (cognitive behavioural therapy delivered with physiotherapy care compared with physiotherapy care), 01 07 (cognitive behavioural therapy delivered with physiotherapy care compared with combined psychological approaches), and 07 08 (combined psychological approaches delivered with physiotherapy care compared with pain education). We visually inspected possible sources of intransitivity and performed numerous sensitivity analysis by (i) removing studies with inpatient study settings, (ii) removing individual and multiple studies with intervention durations outside the range of 6 to 12 weeks, (iii) removing individual and multiple studies utilising different outcome scales, (iv) removing individual studies and multiple studies based on baseline levels of physical function. None of these sensitivity analyses resolved concerns regarding global inconsistency.

After removing the study conducted by O’Keeffe et al. (2020),[60] the single study directly comparing the side 01 07, this removed global ( $\chi^2 = 6.88$ ,  $p = 0.22$ ) and local inconsistency from the network.

As seen, the effect estimates for our main findings, cognitive behavioural therapy compared with physiotherapy care, and combined psychological approaches delivered with physiotherapy care compared with physiotherapy care, remained very similar in magnitude and statistical significance to the primary analysis.

**Supplementary Table 14.10** Pain intensity at post-intervention, excluding studies with high risk of bias

|                                     |                        |                                        |                                        |                                        |                                     |                                     |                        |                                     |                        |                                     |                        |                                        |                                        |                                        |                       |                                     |
|-------------------------------------|------------------------|----------------------------------------|----------------------------------------|----------------------------------------|-------------------------------------|-------------------------------------|------------------------|-------------------------------------|------------------------|-------------------------------------|------------------------|----------------------------------------|----------------------------------------|----------------------------------------|-----------------------|-------------------------------------|
| PC<br>(reference)                   |                        | 0.52 (-<br>0.66,1.70)                  | 0.42 (-<br>0.58,1.42)                  | -0.46 (-<br>1.41,0.49)                 |                                     |                                     | 0.42 (-<br>0.80,1.64)  | 0.28 (-<br>0.56,1.13)               |                        | -0.65 (-<br>2.30,1.00)              |                        | 0.22 (-<br>1.46,1.90)                  | <b>0.92</b><br>( <b>0.31,1.53</b> )    | <b>-1.95</b> (-<br><b>3.18,0.71</b> )  |                       | <b>1.14</b><br>( <b>0.51,1.77</b> ) |
| 0.14 (-<br>1.53,1.80)               | Csl+PC                 |                                        |                                        |                                        |                                     |                                     |                        |                                     |                        |                                     |                        |                                        |                                        |                                        |                       |                                     |
| <b>1.14</b><br>( <b>0.04,2.24</b> ) | 1.01 (-<br>0.99,3.00)  | BT+PC                                  |                                        | -1.10 (-<br>2.34,0.14)                 |                                     |                                     |                        |                                     |                        |                                     |                        |                                        |                                        | <b>-2.46</b> (-<br><b>3.74,-1.18</b> ) |                       |                                     |
| 0.42 (-<br>0.46,1.30)               | 0.29 (-<br>1.60,2.17)  | -0.72 (-<br>2.12,0.68)                 | Mind+PC                                |                                        |                                     |                                     | -0.21 (-<br>1.87,1.45) |                                     |                        |                                     |                        |                                        |                                        |                                        |                       |                                     |
| 0.10 (-<br>0.65,0.85)               | -0.03 (-<br>1.86,1.79) | -1.04 (-<br>2.13,0.06)                 | -0.32 (-<br>1.46,0.83)                 | BT                                     |                                     |                                     |                        |                                     | -0.19 (-<br>2.03,1.65) | -0.41 (-<br>2.07,1.26)              |                        | 0.01 (-<br>0.86,0.88)                  |                                        | <b>-0.98</b> (-<br><b>1.77,-0.19</b> ) |                       |                                     |
| -1.68 (-<br>3.54,0.18)              | -1.82 (-<br>4.31,0.68) | <b>-2.82</b> (-<br><b>4.91,-0.73</b> ) | <b>-2.10</b> (-<br><b>4.15,-0.06</b> ) | -1.78 (-<br>3.67,0.10)                 | Csl                                 |                                     |                        |                                     |                        | 1.55 (-<br>0.08,3.18)               |                        |                                        |                                        |                                        |                       |                                     |
| -0.46 (-<br>1.64,0.72)              | -0.60 (-<br>2.64,1.44) | <b>-1.60</b> (-<br><b>3.10,-0.11</b> ) | -0.88 (-<br>2.34,0.57)                 | -0.57 (-<br>1.74,0.61)                 | 1.22 (-<br>0.83,3.27)               | GP care                             |                        |                                     |                        |                                     |                        | 0.79 (-<br>0.44,2.03)                  |                                        |                                        | 0.30 (-<br>1.40,2.00) |                                     |
| 0.21 (-<br>0.69,1.11)               | 0.07 (-<br>1.82,1.96)  | -0.93 (-<br>2.33,0.46)                 | -0.21 (-<br>1.28,0.86)                 | 0.11 (-<br>1.02,1.23)                  | 1.89 (-<br>0.12,3.90)               | 0.67 (-<br>0.74,2.09)               | PE                     |                                     |                        |                                     |                        |                                        |                                        |                                        | 0.31 (-<br>1.37,1.98) |                                     |
| 0.13 (-<br>0.54,0.79)               | -0.01 (-<br>1.80,1.78) | -1.01 (-<br>2.26,0.23)                 | -0.29 (-<br>1.38,0.79)                 | 0.02 (-<br>0.90,0.95)                  | 1.81 (-<br>0.09,3.70)               | 0.59 (-<br>0.66,1.84)               | -0.08 (-<br>1.14,0.97) | CP+PC                               |                        |                                     |                        |                                        |                                        |                                        | 0.14 (-<br>0.83,1.12) | 0.93 (-<br>0.73,2.59)               |
| 0.04 (-<br>1.21,1.28)               | -0.10 (-<br>2.18,1.98) | -1.10 (-<br>2.62,0.41)                 | -0.38 (-<br>1.90,1.13)                 | -0.07 (-<br>1.20,1.07)                 | 1.72 (-<br>0.37,3.81)               | 0.50 (-<br>0.98,1.98)               | -0.17 (-<br>1.67,1.32) | -0.09 (-<br>1.43,1.25)              | Advice                 |                                     | 0.14 (-<br>1.51,1.79)  | 0.10 (-<br>1.55,1.76)                  |                                        |                                        |                       |                                     |
| -0.13 (-<br>1.03,0.76)              | -0.27 (-<br>2.16,1.62) | -1.28 (-<br>2.58,0.03)                 | -0.56 (-<br>1.79,0.67)                 | -0.24 (-<br>1.17,0.70)                 | 1.55 (-<br>0.08,3.18)               | 0.33 (-<br>0.92,1.57)               | -0.34 (-<br>1.52,0.83) | -0.26 (-<br>1.22,0.70)              | -0.17 (-<br>1.47,1.13) | Usual care                          | 0.44 (-<br>1.22,2.09)  | 0.34 (-<br>1.32,2.00)                  |                                        |                                        | 0.08 (-<br>0.87,1.03) |                                     |
| 0.24 (-<br>1.09,1.58)               | 0.11 (-<br>2.03,2.24)  | -0.90 (-<br>2.50,0.71)                 | -0.18 (-<br>1.76,1.41)                 | 0.14 (-<br>1.15,1.42)                  | 1.92 (-<br>0.16,4.01)               | 0.71 (-<br>0.84,2.25)               | 0.03 (-<br>1.53,1.59)  | 0.12 (-<br>1.30,1.53)               | 0.21 (-<br>1.04,1.45)  | 0.38 (-<br>0.92,1.67)               | Mindfulness            | -0.10 (-<br>1.75,1.56)                 |                                        |                                        |                       |                                     |
| 0.18 (-<br>0.58,0.95)               | 0.05 (-<br>1.79,1.88)  | -0.96 (-<br>2.13,0.21)                 | -0.24 (-<br>1.39,0.91)                 | 0.08 (-<br>0.59,0.75)                  | 1.86 (-<br>0.00,3.73)               | 0.64 (-<br>0.39,1.67)               | -0.03 (-<br>1.15,1.10) | 0.05 (-<br>0.86,0.97)               | 0.14 (-<br>0.95,1.24)  | 0.32 (-<br>0.59,1.22)               | -0.06 (-<br>1.27,1.15) | CBT                                    |                                        | -0.66 (-<br>1.53,0.21)                 |                       | -0.21 (-<br>1.85,1.42)              |
| <b>0.91</b><br>( <b>0.35,1.48</b> ) | 0.78 (-<br>0.98,2.53)  | -0.23 (-<br>1.46,1.00)                 | 0.49 (-<br>0.56,1.53)                  | 0.81 (-<br>0.12,1.74)                  | <b>2.59</b><br>( <b>0.65,4.53</b> ) | <b>1.37</b><br>( <b>0.07,2.68</b> ) | 0.70 (-<br>0.36,1.76)  | 0.78 (-<br>0.08,1.65)               | 0.87 (-<br>0.49,2.24)  | 1.05 (-<br>0.01,2.10)               | 0.67 (-<br>0.78,2.11)  | 0.73 (-<br>0.21,1.67)                  | PE+PC                                  |                                        |                       | 0.06 (-<br>1.64,1.75)               |
| -0.66 (-<br>1.42,0.10)              | -0.79 (-<br>2.62,1.04) | <b>-1.80</b> (-<br><b>2.91,-0.68</b> ) | -1.08 (-<br>2.23,0.07)                 | <b>-0.76</b> (-<br><b>1.45,-0.07</b> ) | 1.02 (-<br>0.87,2.92)               | -0.20 (-<br>1.37,0.98)              | -0.87 (-<br>1.99,0.26) | -0.79 (-<br>1.70,0.13)              | -0.70 (-<br>1.91,0.52) | -0.52 (-<br>1.49,0.44)              | -0.90 (-<br>2.23,0.42) | <b>-0.84</b> (-<br><b>1.53,-0.15</b> ) | <b>-1.57</b> (-<br><b>2.51,-0.63</b> ) | No<br>intervention                     | 0.71 (-<br>1.10,2.52) | 0.11 (-<br>1.53,1.76)               |
| 0.12 (-<br>0.66,0.89)               | -0.02 (-<br>1.85,1.82) | -1.02 (-<br>2.28,0.23)                 | -0.30 (-<br>1.44,0.83)                 | 0.01 (-<br>0.88,0.91)                  | 1.80 (-<br>0.01,3.61)               | 0.58 (-<br>0.56,1.72)               | -0.09 (-<br>1.13,0.94) | -0.01 (-<br>0.77,0.75)              | 0.08 (-<br>1.23,1.38)  | 0.25 (-<br>0.52,1.03)               | -0.13 (-<br>1.48,1.23) | -0.06 (-<br>0.93,0.80)                 | -0.79 (-<br>1.75,0.16)                 | 0.78 (-<br>0.11,1.66)                  | CP                    |                                     |
| <b>0.91</b><br>( <b>0.37,1.46</b> ) | 0.78 (-<br>0.97,2.53)  | -0.23 (-<br>1.41,0.96)                 | 0.49 (-<br>0.54,1.52)                  | 0.81 (-<br>0.05,1.67)                  | <b>2.59</b><br>( <b>0.69,4.50</b> ) | <b>1.38</b><br>( <b>0.13,2.62</b> ) | 0.70 (-<br>0.33,1.74)  | <b>0.79</b><br>( <b>0.00,1.57</b> ) | 0.88 (-<br>0.43,2.18)  | <b>1.05</b><br>( <b>0.06,2.04</b> ) | 0.67 (-<br>0.72,2.06)  | 0.73 (-<br>0.12,1.58)                  | 0.00 (-<br>0.74,0.74)                  | <b>1.57</b><br>( <b>0.74,2.41</b> )    | 0.80 (-<br>0.09,1.68) | CBT+PC                              |

Results are presented as standardised mean differences (SMD) and 95% confidence intervals. BT: behavioural therapy, BT+PC: behavioural therapy delivered with physiotherapy care, CBT: cognitive behavioural therapy, CBT+PC: cognitive behavioural therapy delivered with physiotherapy care, CP: combined psychological approaches, CP+PC: combined physiotherapy approaches delivered with physiotherapy care, Csl: counselling, Csl+PC: counselling delivered with physiotherapy care, GP care: general practitioner care, Mind+PC: mindfulness delivered with physiotherapy care, PC: physiotherapy care, PE: pain education, PE+PC: pain education delivered with physiotherapy care. Estimates in bold denote significance at  $p < 0.05$ . SMD values less than 0.00 favour the column-defining treatment node for the NMA results (lower left triangle) and the row-defining treatment nodes for the pairwise meta-analysis results (upper right triangle).

**Supplementary Table 14.11 Pain intensity at post-intervention, only including studies using intention-to-treatment analysis**

|                            |                                       |                        |                                       |                                       |                                       |                                       |                                       |                                       |                        |                                       |                        |                            |                                       |                        |        |
|----------------------------|---------------------------------------|------------------------|---------------------------------------|---------------------------------------|---------------------------------------|---------------------------------------|---------------------------------------|---------------------------------------|------------------------|---------------------------------------|------------------------|----------------------------|---------------------------------------|------------------------|--------|
| PC<br>(reference)          |                                       |                        | <b>0.86</b><br>(0.21,1.51)            | 0.22 (-<br>1.20,1.64)                 |                                       | -0.65 (-<br>2.01,0.70)                |                                       | <b>1.28</b><br>(0.69,1.87)            | 0.21 (-<br>0.62,1.04)  | 1.41 (-<br>0.02,2.83)                 |                        |                            | -0.25 (-<br>1.63,1.14)                | 0.38 (-<br>0.68,1.44)  |        |
| 0.53 (-<br>0.19,1.25)      | CP                                    | -0.71 (-<br>2.29,0.87) |                                       |                                       |                                       | -0.08 (-<br>0.88,0.72)                |                                       |                                       | -0.14 (-<br>0.98,0.69) | -0.31 (-<br>1.73,1.12)                | -0.30 (-<br>1.75,1.15) |                            |                                       |                        |        |
| 0.25 (-<br>0.64,1.13)      | -0.28 (-<br>1.18,0.61)                | No<br>intervention     |                                       | 0.69 (-<br>0.31,1.70)                 |                                       |                                       |                                       | 0.11 (-<br>1.32,1.55)                 |                        |                                       |                        |                            | 0.22 (-<br>1.27,1.72)                 |                        |        |
| <b>0.90</b><br>(0.30,1.49) | 0.37 (-<br>0.55,1.28)                 | 0.65 (-<br>0.39,1.69)  | PE+PC                                 |                                       |                                       |                                       |                                       | 0.06 (-<br>1.40,1.51)                 |                        |                                       |                        |                            |                                       |                        |        |
| 0.68 (-<br>0.10,1.46)      | 0.15 (-<br>0.65,0.95)                 | 0.43 (-<br>0.36,1.22)  | -0.22 (-<br>1.18,0.74)                | CBT                                   | 0.10 (-<br>1.31,1.51)                 | -0.34 (-<br>1.75,1.07)                | -0.10 (-<br>1.52,1.31)                | -0.21 (-<br>1.61,1.18)                |                        |                                       | 0.02 (-<br>1.38,1.42)  |                            | -0.42 (-<br>1.45,0.62)                |                        |        |
| 0.72 (-<br>0.51,1.95)      | 0.19 (-<br>1.02,1.40)                 | 0.47 (-<br>0.80,1.74)  | -0.18 (-<br>1.53,1.17)                | 0.04 (-<br>1.02,1.10)                 | Mindfulness                           | -0.44 (-<br>1.85,0.97)                | -0.14 (-<br>1.55,1.26)                |                                       |                        |                                       |                        |                            |                                       |                        |        |
| 0.22 (-<br>0.58,1.03)      | -0.31 (-<br>0.97,0.36)                | -0.02 (-<br>0.98,0.93) | -0.67 (-<br>1.66,0.32)                | -0.45 (-<br>1.26,0.35)                | -0.49 (-<br>1.64,0.65)                | Usual care                            |                                       |                                       |                        |                                       |                        |                            | <b>-1.55 (-</b><br><b>2.93,-0.17)</b> | 0.41 (-<br>1.00,1.81)  |        |
| 0.57 (-<br>0.74,1.89)      | 0.04 (-<br>1.27,1.36)                 | 0.33 (-<br>1.01,1.67)  | -0.32 (-<br>1.75,1.11)                | -0.10 (-<br>1.22,1.01)                | -0.14 (-<br>1.25,0.97)                | 0.35 (-<br>0.93,1.64)                 | Advice                                |                                       |                        |                                       |                        |                            |                                       |                        |        |
| <b>1.13</b><br>(0.63,1.63) | 0.60 (-<br>0.19,1.39)                 | 0.88 (-<br>0.00,1.77)  | 0.23 (-<br>0.49,0.95)                 | 0.41 (-<br>0.36,1.26)                 | 0.45 (-<br>0.85,1.67)                 | 0.90<br>(0.03,1.78)                   | 0.55 (-<br>0.78,1.89)                 | CBT+PC                                | -0.93 (-<br>2.34,0.48) |                                       |                        |                            |                                       |                        |        |
| 0.28 (-<br>0.34,0.91)      | -0.25 (-<br>0.92,0.42)                | 0.04 (-<br>0.92,1.00)  | -0.61 (-<br>1.46,0.24)                | -0.39 (-<br>1.27,0.48)                | -0.43 (-<br>1.71,0.85)                | 0.06 (-<br>0.79,0.91)                 | -0.29 (-<br>1.66,1.08)                | <b>-0.84 (-</b><br><b>1.56,-0.13)</b> | CP+PC                  |                                       |                        |                            |                                       |                        |        |
| 0.64 (-<br>0.28,1.56)      | 0.11 (-<br>0.87,1.09)                 | 0.40 (-<br>0.80,1.59)  | -0.25 (-<br>1.34,0.83)                | -0.04 (-<br>1.16,1.09)                | -0.08 (-<br>1.54,1.38)                | 0.42 (-<br>0.69,1.52)                 | 0.07 (-<br>1.47,1.61)                 | -0.49 (-<br>1.51,0.53)                | 0.36 (-<br>0.67,1.38)  | PE                                    |                        |                            |                                       | 0.21 (-<br>1.20,1.62)  |        |
| 0.47 (-<br>0.70,1.65)      | -0.06 (-<br>1.13,1.02)                | 0.23 (-<br>1.01,1.47)  | -0.42 (-<br>1.73,0.88)                | -0.21 (-<br>1.27,0.86)                | -0.24 (-<br>1.70,1.21)                | 0.25 (-<br>0.93,1.42)                 | -0.10 (-<br>1.62,1.41)                | -0.66 (-<br>1.87,0.56)                | 0.19 (-<br>1.01,1.39)  | -0.17 (-<br>1.56,1.23)                | GP care                |                            |                                       |                        |        |
| -1.32 (-<br>2.92,0.28)     | <b>-1.85 (-</b><br><b>3.39,-0.32)</b> | -1.57 (-<br>3.25,0.11) | <b>-2.22 (-</b><br><b>3.92,-0.52)</b> | <b>-2.00 (-</b><br><b>3.60,-0.40)</b> | <b>-2.04 (-3.83,-</b><br><b>0.25)</b> | <b>-1.55 (-</b><br><b>2.93,-0.17)</b> | <b>-1.90 (-</b><br><b>3.78,-0.01)</b> | <b>-2.45 (-</b><br><b>4.09,-0.82)</b> | -1.61 (-<br>3.23,0.01) | <b>-1.96 (-</b><br><b>3.73,-0.20)</b> | -1.80 (-<br>3.61,0.02) | Csl                        |                                       |                        |        |
| 0.32 (-<br>0.60,1.24)      | -0.21 (-<br>1.18,0.75)                | 0.07 (-<br>0.89,1.03)  | -0.58 (-<br>1.66,0.50)                | -0.36 (-<br>1.18,0.45)                | -0.40 (-<br>1.68,0.88)                | 0.09 (-<br>0.85,1.04)                 | -0.26 (-<br>1.61,1.09)                | -0.81 (-<br>1.78,0.16)                | 0.03 (-<br>0.98,1.05)  | -0.32 (-<br>1.56,0.91)                | -0.16 (-<br>1.43,1.12) | 1.64 (-<br>0.03,3.31)      | BT                                    |                        |        |
| 0.55 (-<br>0.35,1.45)      | 0.02 (-<br>1.07,1.11)                 | 0.30 (-<br>0.93,1.54)  | -0.34 (-<br>1.42,0.73)                | -0.13 (-<br>1.29,1.03)                | -0.17 (-<br>1.66,1.33)                | 0.33 (-<br>0.84,1.49)                 | -0.02 (-<br>1.60,1.55)                | -0.58 (-<br>1.60,0.44)                | 0.27 (-<br>0.80,1.33)  | -0.09 (-<br>1.11,0.93)                | 0.08 (-<br>1.37,1.53)  | <b>1.87</b><br>(0.07,3.68) | 0.23 (-<br>1.03,1.50)                 | Mind+PC                |        |
| 0.14 (-<br>1.28,1.56)      | -0.39 (-<br>1.98,1.20)                | -0.11 (-<br>1.78,1.56) | -0.76 (-<br>2.30,0.78)                | -0.54 (-<br>2.16,1.08)                | -0.58 (-<br>2.46,1.30)                | -0.09 (-<br>1.72,1.54)                | -0.44 (-<br>2.37,1.50)                | -0.99 (-<br>2.50,0.51)                | -0.15 (-<br>1.70,1.40) | -0.51 (-<br>2.19,1.18)                | -0.34 (-<br>2.18,1.51) | 1.46 (-<br>0.68,3.60)      | -0.18 (-<br>1.87,1.51)                | -0.41 (-<br>2.10,1.27) | Csl+PC |

Results are presented as standardised mean differences (SMD) and 95% confidence intervals. BT: behavioural therapy, CBT: cognitive behavioural therapy, CBT+PC: cognitive behavioural therapy delivered with physiotherapy care, CP: combined psychological approaches, CP+PC: combined psychological approaches delivered with physiotherapy care, Csl: counselling, Csl+PC: counselling delivered with physiotherapy care, GP care: general practitioner care, Mind+PC: mindfulness delivered with physiotherapy care, PC: physiotherapy care, PE: pain education, PE+PC: pain education delivered with physiotherapy care. Estimates in bold denote significance at  $p < 0.05$ . SMD values less than 0.00 favour the column-defining treatment node for the NMA results (lower left triangle) and the row-defining treatment nodes for the pairwise meta-analysis results (upper right triangle).

**Supplementary Table 14.12** Pain intensity at post-intervention, excluding studies published prior to year 1995

|                                   |                                 |                                   |                                   |                                 |                                   |                        |                                   |                        |                                   |                        |                                   |                                   |                                   |                        |                        |        |  |  |  |
|-----------------------------------|---------------------------------|-----------------------------------|-----------------------------------|---------------------------------|-----------------------------------|------------------------|-----------------------------------|------------------------|-----------------------------------|------------------------|-----------------------------------|-----------------------------------|-----------------------------------|------------------------|------------------------|--------|--|--|--|
| PC<br>(reference)                 |                                 |                                   |                                   |                                 |                                   |                        |                                   |                        |                                   |                        |                                   |                                   |                                   |                        |                        |        |  |  |  |
| <b>0.90</b><br><b>(0.32,1.47)</b> | CBT+PC                          |                                   |                                   |                                 |                                   |                        |                                   |                        |                                   |                        |                                   |                                   |                                   |                        |                        |        |  |  |  |
| 0.07 (-<br>0.76,0.90)             | -0.82 (-<br>1.75,0.11)          | CP                                |                                   |                                 |                                   |                        |                                   |                        |                                   |                        |                                   |                                   |                                   |                        |                        |        |  |  |  |
| -0.86 (-<br>1.78,0.07)            | <b>-1.75 (-<br/>2.72,-0.79)</b> | -0.93 (-<br>1.91,0.05)            | No<br>intervention                |                                 |                                   |                        |                                   |                        |                                   |                        |                                   |                                   |                                   |                        |                        |        |  |  |  |
| <b>0.91</b><br><b>(0.32,1.51)</b> | 0.01 (-<br>0.77,0.80)           | 0.84 (-<br>0.18,1.85)             | <b>1.77</b><br><b>(0.68,2.85)</b> | PE+PC                           |                                   |                        |                                   |                        |                                   |                        |                                   |                                   |                                   |                        |                        |        |  |  |  |
| 0.21 (-<br>0.68,1.10)             | -0.68 (-<br>1.63,0.27)          | 0.14 (-<br>0.81,1.09)             | <b>1.07</b><br><b>(0.21,1.93)</b> | -0.70 (-<br>1.76,0.36)          | CBT                               |                        |                                   |                        |                                   |                        |                                   |                                   |                                   |                        |                        |        |  |  |  |
| 0.08 (-<br>1.20,1.35)             | -0.82 (-<br>2.14,0.50)          | 0.00 (-<br>1.29,1.29)             | 0.93 (-<br>0.25,2.11)             | -0.83 (-<br>2.24,0.57)          | -0.14 (-<br>1.27,0.99)            | Mindfulne<br>ss        |                                   |                        |                                   |                        |                                   |                                   |                                   |                        |                        |        |  |  |  |
| -0.18 (-<br>1.14,0.77)            | <b>-1.08 (-<br/>2.12,-0.03)</b> | -0.26 (-<br>1.07,0.56)            | 0.67 (-<br>0.39,1.74)             | -1.09 (-<br>2.21,0.02)          | -0.40 (-<br>1.38,0.59)            | -0.26 (-<br>1.51,1.00) | Usual care                        |                        |                                   |                        |                                   |                                   |                                   |                        |                        |        |  |  |  |
| 0.02 (-<br>1.52,1.56)             | -0.87 (-<br>2.45,0.70)          | -0.05 (-<br>1.62,1.51)            | 0.88 (-<br>0.62,2.37)             | -0.89 (-<br>2.53,0.75)          | -0.19 (-<br>1.53,1.15)            | -0.05 (-<br>1.39,1.28) | 0.20 (-<br>1.36,1.76)             | Advice                 |                                   |                        |                                   |                                   |                                   |                        |                        |        |  |  |  |
| 0.11 (-<br>0.59,0.81)             | -0.79 (-<br>1.61,0.04)          | 0.03 (-<br>0.77,0.84)             | 0.97 (-<br>0.08,2.01)             | -0.80 (-<br>1.71,0.11)          | -0.10 (-<br>1.13,0.92)            | 0.03 (-<br>1.33,1.39)  | 0.29 (-<br>0.73,1.31)             | 0.09 (-<br>1.53,1.70)  | CP+PC                             |                        |                                   |                                   |                                   |                        |                        |        |  |  |  |
| 0.20 (-<br>0.74,1.14)             | -0.70 (-<br>1.78,0.39)          | 0.12 (-<br>0.97,1.22)             | 1.05 (-<br>0.20,2.31)             | -0.71 (-<br>1.82,0.40)          | -0.02 (-<br>1.25,1.22)            | 0.12 (-<br>1.41,1.65)  | 0.38 (-<br>0.86,1.62)             | 0.18 (-<br>1.58,1.93)  | 0.09 (-<br>1.02,1.20)             | PE                     |                                   |                                   |                                   |                        |                        |        |  |  |  |
| -0.46 (-<br>1.74,0.81)            | <b>-1.36 (-<br/>2.69,-0.03)</b> | -0.54 (-<br>1.74,0.67)            | 0.39 (-<br>0.90,1.69)             | -1.37 (-<br>2.77,0.03)          | -0.68 (-<br>1.76,0.41)            | -0.54 (-<br>2.04,0.97) | -0.28 (-<br>1.60,1.04)            | -0.48 (-<br>2.18,1.22) | -0.57 (-<br>1.90,0.76)            | -0.66 (-<br>2.17,0.85) | GP care                           |                                   |                                   |                        |                        |        |  |  |  |
| -1.73 (-<br>3.69,0.24)            | <b>-2.62 (-<br/>4.64,-0.61)</b> | -1.80 (-<br>3.71,0.10)            | -0.87 (-<br>2.89,1.15)            | <b>-2.64 (-<br/>4.69,-0.59)</b> | -1.94 (-<br>3.93,0.04)            | -1.80 (-<br>3.93,0.32) | -1.55 (-<br>3.27,0.17)            | -1.75 (-<br>4.07,0.57) | -1.84 (-<br>3.84,0.16)            | -1.93 (-<br>4.05,0.19) | -1.27 (-<br>3.43,0.90)            | Csl                               |                                   |                        |                        |        |  |  |  |
| 0.03 (-<br>0.93,0.99)             | -0.87 (-<br>1.91,0.18)          | -0.05 (-<br>1.12,1.02)            | 0.88 (-<br>0.10,1.87)             | -0.88 (-<br>2.00,0.24)          | -0.19 (-<br>1.11,0.74)            | -0.05 (-<br>1.37,1.28) | 0.21 (-<br>0.87,1.29)             | 0.01 (-<br>1.56,1.58)  | -0.08 (-<br>1.18,1.02)            | -0.17 (-<br>1.47,1.13) | 0.49 (-<br>0.86,1.84)             | 1.76 (-<br>0.27,3.79)             | BT                                |                        |                        |        |  |  |  |
| 0.42 (-<br>0.50,1.34)             | -0.48 (-<br>1.56,0.60)          | 0.34 (-<br>0.86,1.54)             | 1.27 (-<br>0.01,2.56)             | -0.49 (-<br>1.59,0.61)          | 0.20 (-<br>1.06,1.47)             | 0.34 (-<br>1.22,1.90)  | 0.60 (-<br>0.70,1.90)             | 0.40 (-<br>1.38,2.18)  | 0.31 (-<br>0.83,1.45)             | 0.22 (-<br>0.90,1.35)  | 0.88 (-<br>0.67,2.43)             | 2.15 (-<br>0.01,4.30)             | 0.39 (-<br>0.93,1.71)             | Mind+PC                |                        |        |  |  |  |
| <b>1.95</b><br><b>(0.33,3.56)</b> | 1.05 (-<br>0.63,2.73)           | <b>1.87</b><br><b>(0.14,3.60)</b> | <b>2.80</b><br><b>(1.13,4.48)</b> | 1.04 (-<br>0.68,2.75)           | <b>1.73</b><br><b>(0.03,3.43)</b> | 1.87 (-<br>0.06,3.80)  | <b>2.13</b><br><b>(0.36,3.90)</b> | 1.92 (-<br>0.19,4.04)  | <b>1.84</b><br><b>(0.11,3.56)</b> | 1.75 (-<br>0.10,3.60)  | <b>2.41</b><br><b>(0.46,4.36)</b> | <b>3.67</b><br><b>(1.21,6.14)</b> | <b>1.92</b><br><b>(0.28,3.55)</b> | 1.53 (-<br>0.33,3.38)  | BT+PC                  |        |  |  |  |
| 0.14 (-<br>1.61,1.89)             | -0.76 (-<br>2.60,1.08)          | 0.06 (-<br>1.88,2.00)             | 0.99 (-<br>0.99,2.97)             | -0.77 (-<br>2.62,1.07)          | -0.08 (-<br>2.04,1.89)            | 0.06 (-<br>2.11,2.23)  | 0.32 (-<br>1.68,2.31)             | 0.11 (-<br>2.22,2.45)  | 0.03 (-<br>1.86,1.91)             | -0.06 (-<br>2.05,1.93) | 0.60 (-<br>1.57,2.76)             | 1.86 (-<br>0.77,4.50)             | 0.11 (-<br>1.89,2.10)             | -0.28 (-<br>2.26,1.70) | -1.81 (-<br>4.19,0.57) | Csl+PC |  |  |  |

Results are presented as standardised mean differences (SMD) and 95% confidence intervals. BT: behavioural therapy, BT+PC: behavioural therapy delivered with physiotherapy care, CBT: cognitive behavioural therapy, CBT+PC: cognitive behavioural therapy delivered with physiotherapy care, CP: combined psychological approaches, CP+PC: combined psychological approaches delivered with physiotherapy care, Csl: counselling, Csl+PC: counselling delivered with physiotherapy care, GP care: general practitioner care, Mind+PC: mindfulness delivered with physiotherapy care, PC: physiotherapy care, PE: pain education, PE+PC: pain education delivered with physiotherapy care. Estimates in bold denote significance at  $p < 0.05$ . SMD values less than 0.00 favour the column-defining treatment node for the NMA results (lower left triangle) and the row-defining treatment nodes for the pairwise meta-analysis results (upper right triangle).

**Supplementary Table 14.13 Pain intensity at post-intervention, excluding studies published prior to year 2000**

|                            |                                        |                            |                                       |                                        |                            |                        |                            |                        |                            |                        |                            |                            |                            |                                      |                            |        |
|----------------------------|----------------------------------------|----------------------------|---------------------------------------|----------------------------------------|----------------------------|------------------------|----------------------------|------------------------|----------------------------|------------------------|----------------------------|----------------------------|----------------------------|--------------------------------------|----------------------------|--------|
| PC (reference)             | <b>1.14</b><br>(0.47,1.82)             |                            | <b>-4.73</b> (-<br><b>6.42,3.04</b> ) | <b>0.92</b><br>(0.27,1.57)             | 0.22 (-<br>1.58,2.02)      |                        | -0.65 (-<br>2.43,1.12)     |                        | 0.33 (-<br>0.72,1.37)      | 0.42 (-<br>0.89,1.72)  |                            |                            | -0.63 (-<br>1.88,0.63)     | 0.42 (-<br>0.64,1.49)                | 0.55 (-<br>1.12,2.21)      |        |
| <b>0.89</b><br>(0.31,1.48) | CBT+PC                                 |                            | -0.11 (-<br>1.84,1.61)                | -0.06 (-<br>1.87,1.76)                 | 0.21 (-<br>1.54,1.97)      |                        |                            |                        | -0.93 (-<br>2.71,0.85)     |                        |                            |                            |                            |                                      |                            |        |
| 0.07 (-<br>0.79,0.93)      | -0.83 (-<br>1.78,0.53)                 | CP                         | -0.71 (-<br>2.63,1.21)                |                                        |                            |                        | -0.08 (-<br>1.10,0.94)     |                        | -0.14 (-<br>1.19,0.90)     | -0.31 (-<br>2.10,1.49) | -0.30 (-<br>2.12,1.51)     |                            |                            |                                      |                            |        |
| -0.86 (-<br>1.80,0.08)     | <b>-1.76</b> (-<br><b>2.74,-0.78</b> ) | -0.93 (-<br>1.93,0.07)     | No<br>intervention                    |                                        | 0.71 (-<br>0.56,1.98)      | 0.52 (-<br>1.36,2.40)  |                            |                        |                            |                        |                            |                            | <b>1.67</b><br>(0.36,2.98) |                                      | <b>5.32</b><br>(3.56,7.08) |        |
| <b>0.91</b><br>(0.31,1.51) | 0.02 (-<br>0.78,0.81)                  | 0.84 (-<br>0.20,1.88)      | <b>1.77</b><br>(0.67,2.88)            | PE+PC                                  |                            |                        |                            |                        |                            |                        |                            |                            |                            |                                      |                            |        |
| 0.21 (-<br>0.70,1.12)      | -0.68 (-<br>1.65,0.28)                 | 0.14 (-<br>0.83,1.11)      | <b>1.07</b><br>(0.20,1.95)            | -0.70 (-<br>1.78,0.38)                 | CBT                        | 0.10 (-<br>1.68,1.87)  | -0.34 (-<br>2.12,1.44)     | -0.10 (-<br>1.88,1.67) |                            |                        | -0.81 (-<br>2.12,0.51)     |                            | -0.42 (-<br>1.71,0.86)     |                                      |                            |        |
| 0.07 (-<br>1.23,1.37)      | -0.82 (-<br>2.17,0.52)                 | 0.00 (-<br>1.31,1.31)      | 0.93 (-<br>0.26,2.13)                 | -0.84 (-<br>2.27,0.58)                 | -0.14 (-<br>1.29,1.01)     | Mindfulness            | -0.44 (-<br>2.21,1.34)     | -0.14 (-<br>1.92,1.63) |                            |                        |                            |                            |                            |                                      |                            |        |
| -0.19 (-<br>1.16,0.79)     | <b>-1.08</b> (-<br><b>2.15,-0.02</b> ) | -0.26 (-<br>1.09,0.58)     | 0.68 (-<br>0.40,1.76)                 | -1.10 (-<br>2.24,0.04)                 | -0.40 (-<br>1.40,0.61)     | -0.26 (-<br>1.53,1.02) | Usual care                 |                        |                            |                        |                            | -1.55 (-<br>3.29,0.20)     | 0.41 (-<br>1.37,2.19)      |                                      |                            |        |
| 0.02 (-<br>1.55,1.58)      | -0.88 (-<br>2.48,0.73)                 | -0.05 (-<br>1.64,1.54)     | 0.88 (-<br>0.64,2.40)                 | -0.89 (-<br>2.57,0.78)                 | -0.19 (-<br>1.56,1.17)     | -0.05 (-<br>1.41,1.31) | 0.20 (-<br>1.38,1.79)      | Advice                 |                            |                        |                            |                            |                            |                                      |                            |        |
| 0.10 (-<br>0.68,0.88)      | -0.79 (-<br>1.68,0.09)                 | 0.03 (-<br>0.80,0.86)      | 0.96 (-<br>0.13,2.05)                 | -0.81 (-<br>1.79,0.16)                 | -0.11 (-<br>1.17,0.95)     | 0.03 (-<br>1.37,1.43)  | 0.29 (-<br>0.76,1.34)      | 0.08 (-<br>1.57,1.74)  | CP+PC                      |                        |                            |                            |                            |                                      |                            |        |
| 0.20 (-<br>0.76,1.15)      | -0.70 (-<br>1.80,0.40)                 | 0.13 (-<br>0.99,1.25)      | 1.06 (-<br>0.22,2.34)                 | -0.71 (-<br>1.84,0.42)                 | -0.01 (-<br>1.27,1.24)     | 0.13 (-<br>1.43,1.68)  | 0.38 (-<br>0.88,1.65)      | 0.18 (-<br>1.61,1.97)  | 0.10 (-<br>1.06,1.25)      | PE                     |                            |                            |                            | 0.21 (-<br>1.57,1.99)                |                            |        |
| -0.47 (-<br>1.77,0.83)     | <b>-1.36</b> (-<br><b>2.71,-0.01</b> ) | -0.54 (-<br>1.77,0.69)     | 0.39 (-<br>0.92,1.71)                 | -1.38 (-<br>2.80,0.05)                 | -0.68 (-<br>1.78,0.42)     | -0.54 (-<br>2.07,0.99) | -0.28 (-<br>1.62,1.06)     | -0.48 (-<br>2.21,1.24) | -0.57 (-<br>1.94,0.80)     | -0.66 (-<br>2.20,0.87) | GP care                    |                            |                            |                                      |                            |        |
| -1.73 (-<br>3.74,0.27)     | <b>-2.63</b> (-<br><b>4.67,-0.58</b> ) | -1.80 (-<br>3.74,0.13)     | -0.87 (-<br>2.92,1.18)                | <b>-2.64</b> (-<br><b>4.73,-0.56</b> ) | -1.94 (-<br>3.96,0.07)     | -1.80 (-<br>3.97,0.36) | -1.55 (-<br>3.29,0.20)     | -1.75 (-<br>4.11,0.61) | -1.83 (-<br>3.87,0.21)     | -1.93 (-<br>4.09,0.23) | -1.27 (-<br>3.47,0.94)     | Csl                        |                            |                                      |                            |        |
| 0.03 (-<br>0.95,1.00)      | -0.87 (-<br>1.93,0.19)                 | -0.04 (-<br>1.13,1.05)     | 0.89 (-<br>0.11,1.89)                 | -0.88 (-<br>2.02,0.26)                 | -0.18 (-<br>1.12,0.75)     | -0.04 (-<br>1.39,1.30) | 0.21 (-<br>0.89,1.31)      | 0.01 (-<br>1.59,1.61)  | -0.07 (-<br>1.22,1.07)     | -0.17 (-<br>1.49,1.15) | 0.49 (-<br>0.88,1.87)      | 1.76 (-<br>0.31,3.83)      | BT                         |                                      | 1.56 (-<br>0.32,3.45)      |        |
| 0.42 (-<br>0.52,1.35)      | -0.48 (-<br>1.58,0.62)                 | 0.35 (-<br>0.88,1.58)      | 1.28 (-<br>0.03,2.59)                 | -0.49 (-<br>1.61,0.62)                 | 0.21 (-<br>1.08,1.49)      | 0.35 (-<br>1.24,1.94)  | 0.61 (-<br>0.72,1.93)      | 0.40 (-<br>1.41,2.21)  | 0.32 (-<br>0.88,1.52)      | 0.22 (-<br>0.92,1.37)  | 0.89 (-<br>0.69,2.47)      | 2.15 (-<br>0.04,4.35)      | 0.39 (-<br>0.95,1.73)      | Mind+PC                              |                            |        |
| <b>1.95</b><br>(0.31,3.59) | 1.06 (-<br>0.65,2.76)                  | <b>1.88</b><br>(0.12,3.65) | <b>2.82</b><br>(1.12,4.51)            | 1.04 (-<br>0.70,2.78)                  | <b>1.74</b><br>(0.02,3.47) | 1.88 (-<br>0.07,3.84)  | <b>2.14</b><br>(0.34,3.94) | 1.94 (-<br>0.21,4.08)  | <b>1.85</b><br>(0.08,3.62) | 1.76 (-<br>0.12,3.63)  | <b>2.42</b><br>(0.44,4.40) | <b>3.69</b><br>(1.18,6.19) | <b>1.93</b><br>(0.27,3.59) | <b>1.53</b> (-<br><b>0.35,3.41</b> ) | BT+PC                      |        |
| 0.14 (-<br>1.64,1.91)      | -0.76 (-<br>2.63,1.11)                 | 0.07 (-<br>1.91,2.04)      | 1.00 (-<br>1.01,3.01)                 | -0.77 (-<br>2.65,1.10)                 | -0.07 (-<br>2.07,1.92)     | 0.07 (-<br>2.14,2.27)  | 0.32 (-<br>1.71,2.35)      | 0.12 (-<br>2.25,2.49)  | 0.04 (-<br>1.91,1.98)      | -0.06 (-<br>2.08,1.96) | 0.60 (-<br>1.60,2.81)      | 1.87 (-<br>0.81,4.55)      | 0.11 (-<br>1.92,2.14)      | -0.28 (-<br>2.29,1.73)               | -1.82 (-<br>4.23,0.60)     | Csl+PC |

Results are presented as standardised mean differences (SMD) and 95% confidence intervals. BT: behavioural therapy, BT+PC: behavioural therapy delivered with physiotherapy care, CBT: cognitive behavioural therapy, CBT+PC: cognitive behavioural therapy delivered with physiotherapy care, CP: combined psychological approaches, CP+PC: combined psychological approaches delivered with physiotherapy care, Csl: counselling, Csl+PC: counselling delivered with physiotherapy care, GP care: general practitioner care, Mind+PC: mindfulness delivered with physiotherapy care, PC: physiotherapy care, PE: pain education, PE+PC: pain education delivered with physiotherapy care. Estimates in bold denote significance at  $p < 0.05$ . SMD values less than 0.00 favour the column-defining treatment node for the NMA results (lower left triangle) and the row-defining treatment nodes for the pairwise meta-analysis results (upper right triangle).

**Supplementary Table 14.14** Pain intensity at post-intervention, excluding studies published prior to year 2005

|                                   |                                 |                                   |                                   |                                 |                                   |                        |                                   |                        |                                   |                        |                                   |                                   |                                   |                        |                        |        |  |
|-----------------------------------|---------------------------------|-----------------------------------|-----------------------------------|---------------------------------|-----------------------------------|------------------------|-----------------------------------|------------------------|-----------------------------------|------------------------|-----------------------------------|-----------------------------------|-----------------------------------|------------------------|------------------------|--------|--|
| PC<br>(reference)                 |                                 |                                   |                                   |                                 |                                   |                        |                                   |                        |                                   |                        |                                   |                                   |                                   |                        |                        |        |  |
| <b>0.89</b><br><b>(0.31,1.48)</b> | CBT+PC                          |                                   |                                   |                                 |                                   |                        |                                   |                        |                                   |                        |                                   |                                   |                                   |                        |                        |        |  |
| 0.07 (-<br>0.79,0.93)             | -0.83 (-<br>1.78,0.13)          | CP                                |                                   |                                 |                                   |                        |                                   |                        |                                   |                        |                                   |                                   |                                   |                        |                        |        |  |
| -0.86 (-<br>1.80,0.08)            | <b>-1.76 (-<br/>2.74,-0.78)</b> | -0.93 (-<br>1.93,0.07)            | No<br>intervention                |                                 |                                   |                        |                                   |                        |                                   |                        |                                   |                                   |                                   |                        |                        |        |  |
| <b>0.91</b><br><b>(0.31,1.51)</b> | 0.02 (-<br>0.78,0.81)           | 0.84 (-<br>0.20,1.88)             | <b>1.77</b><br><b>(0.67,2.88)</b> | PE+PC                           |                                   |                        |                                   |                        |                                   |                        |                                   |                                   |                                   |                        |                        |        |  |
| 0.21 (-<br>0.70,1.12)             | -0.68 (-<br>1.65,0.28)          | 0.14 (-<br>0.83,1.11)             | <b>1.07</b><br><b>(0.20,1.95)</b> | -0.70 (-<br>1.78,0.38)          | CBT                               |                        |                                   |                        |                                   |                        |                                   |                                   |                                   |                        |                        |        |  |
| 0.07 (-<br>1.23,1.37)             | -0.82 (-<br>2.17,0.52)          | 0.00 (-<br>1.31,1.31)             | 0.93 (-<br>0.26,2.13)             | -0.84 (-<br>2.27,0.58)          | -0.14 (-<br>1.29,1.01)            | Mindfulness            |                                   |                        |                                   |                        |                                   |                                   |                                   |                        |                        |        |  |
| -0.19 (-<br>1.16,0.79)            | <b>-1.08 (-<br/>2.15,-0.02)</b> | -0.26 (-<br>1.09,0.58)            | 0.68 (-<br>0.40,1.76)             | -1.10 (-<br>2.24,0.04)          | -0.40 (-<br>1.40,0.61)            | -0.26 (-<br>1.53,1.02) | Usual care                        |                        |                                   |                        |                                   |                                   |                                   |                        |                        |        |  |
| 0.02 (-<br>1.55,1.58)             | -0.88 (-<br>2.48,0.73)          | -0.05 (-<br>1.64,1.54)            | 0.88 (-<br>0.64,2.40)             | -0.89 (-<br>2.57,0.78)          | -0.19 (-<br>1.56,1.17)            | -0.05 (-<br>1.41,1.31) | 0.20 (-<br>1.38,1.79)             | Advice                 |                                   |                        |                                   |                                   |                                   |                        |                        |        |  |
| 0.10 (-<br>0.68,0.88)             | -0.79 (-<br>1.68,0.09)          | 0.03 (-<br>0.80,0.86)             | 0.96 (-<br>0.13,2.05)             | -0.81 (-<br>1.79,0.16)          | -0.11 (-<br>1.17,0.95)            | 0.03 (-<br>1.37,1.43)  | 0.29 (-<br>0.76,1.34)             | 0.08 (-<br>1.57,1.74)  | CP+PC                             |                        |                                   |                                   |                                   |                        |                        |        |  |
| 0.20 (-<br>0.76,1.15)             | -0.70 (-<br>1.80,0.40)          | 0.13 (-<br>0.99,1.25)             | 1.06 (-<br>0.22,2.34)             | -0.71 (-<br>1.84,0.42)          | -0.01 (-<br>1.27,1.24)            | 0.13 (-<br>1.43,1.68)  | 0.38 (-<br>0.88,1.65)             | 0.18 (-<br>1.61,1.97)  | 0.10 (-<br>1.06,1.25)             | PE                     |                                   |                                   |                                   |                        |                        |        |  |
| -0.47 (-<br>1.77,0.83)            | <b>-1.36 (-<br/>2.71,-0.01)</b> | -0.54 (-<br>1.77,0.69)            | 0.39 (-<br>0.92,1.71)             | -1.38 (-<br>2.80,0.05)          | -0.68 (-<br>1.78,0.42)            | -0.54 (-<br>2.07,0.99) | -0.28 (-<br>1.62,1.06)            | -0.48 (-<br>2.21,1.24) | -0.57 (-<br>1.94,0.80)            | -0.66 (-<br>2.20,0.87) | GP care                           |                                   |                                   |                        |                        |        |  |
| -1.73 (-<br>3.74,0.27)            | <b>-2.63 (-<br/>4.67,-0.58)</b> | -1.80 (-<br>3.74,0.13)            | -0.87 (-<br>2.92,1.18)            | <b>-2.64 (-<br/>4.73,-0.56)</b> | -1.94 (-<br>3.96,0.07)            | -1.80 (-<br>3.97,0.36) | -1.55 (-<br>3.29,0.20)            | -1.75 (-<br>4.11,0.61) | -1.83 (-<br>3.87,0.21)            | -1.93 (-<br>4.09,0.23) | -1.27 (-<br>3.47,0.94)            | Csl                               |                                   |                        |                        |        |  |
| 0.03 (-<br>0.95,1.00)             | -0.87 (-<br>1.93,0.19)          | -0.04 (-<br>1.13,1.05)            | 0.89 (-<br>0.11,1.89)             | -0.88 (-<br>2.02,0.26)          | -0.18 (-<br>1.12,0.75)            | -0.04 (-<br>1.39,1.30) | 0.21 (-<br>0.89,1.31)             | 0.01 (-<br>1.59,1.61)  | -0.07 (-<br>1.22,1.07)            | -0.17 (-<br>1.49,1.15) | 0.49 (-<br>0.88,1.87)             | 1.76 (-<br>0.31,3.83)             | BT                                |                        |                        |        |  |
| 0.42 (-<br>0.52,1.35)             | -0.48 (-<br>1.58,0.62)          | 0.35 (-<br>0.88,1.58)             | 1.28 (-<br>0.03,2.59)             | -0.49 (-<br>1.61,0.62)          | 0.21 (-<br>1.08,1.49)             | 0.35 (-<br>1.24,1.94)  | 0.61 (-<br>0.72,1.93)             | 0.40 (-<br>1.41,2.21)  | 0.32 (-<br>0.88,1.52)             | 0.22 (-<br>0.92,1.37)  | 0.89 (-<br>0.69,2.47)             | 2.15 (-<br>0.04,4.35)             | 0.39 (-<br>0.95,1.73)             | Mind+PC                |                        |        |  |
| <b>1.95</b><br><b>(0.31,3.59)</b> | 1.06 (-<br>0.65,2.76)           | <b>1.88</b><br><b>(0.12,3.65)</b> | <b>2.82</b><br><b>(1.12,4.51)</b> | 1.04 (-<br>0.70,2.78)           | <b>1.74</b><br><b>(0.02,3.47)</b> | 1.88 (-<br>0.07,3.84)  | <b>2.14</b><br><b>(0.34,3.94)</b> | 1.94 (-<br>0.21,4.08)  | <b>1.85</b><br><b>(0.08,3.62)</b> | 1.76 (-<br>0.12,3.63)  | <b>2.42</b><br><b>(0.44,4.40)</b> | <b>3.69</b><br><b>(1.18,6.19)</b> | <b>1.93</b><br><b>(0.27,3.59)</b> | 1.53 (-<br>0.35,3.41)  | BT+PC                  |        |  |
| 0.14 (-<br>1.64,1.91)             | -0.76 (-<br>2.63,1.11)          | 0.07 (-<br>1.91,2.04)             | 1.00 (-<br>1.01,3.01)             | -0.77 (-<br>2.65,1.10)          | -0.07 (-<br>2.07,1.92)            | 0.07 (-<br>2.14,2.27)  | 0.32 (-<br>1.71,2.35)             | 0.12 (-<br>2.25,2.49)  | 0.04 (-<br>1.91,1.98)             | -0.06 (-<br>2.08,1.96) | 0.60 (-<br>1.60,2.81)             | 1.87 (-<br>0.81,4.55)             | 0.11 (-<br>1.92,2.14)             | -0.28 (-<br>2.29,1.73) | -1.82 (-<br>4.23,0.60) | Csl+PC |  |

Results are presented as standardised mean differences (SMD) and 95% confidence intervals. BT: behavioural therapy, BT+PC: behavioural therapy delivered with physiotherapy care, CBT: cognitive behavioural therapy, CBT+PC: cognitive behavioural therapy delivered with physiotherapy care, CP: combined psychological approaches, CP+PC: combined psychological approaches delivered with physiotherapy care, Csl: counselling, Csl+PC: counselling delivered with physiotherapy care, GP care: general practitioner care, Mind+PC: mindfulness delivered with physiotherapy care, PC: physiotherapy care, PE: pain education, PE+PC: pain education delivered with physiotherapy care. Estimates in bold denote significance at  $p < 0.05$ . SMD values less than 0.00 favour the column-defining treatment node for the NMA results (lower left triangle) and the row-defining treatment nodes for the pairwise meta-analysis results (upper right triangle).

**Supplementary Table 14.15** Pain intensity at post-intervention, excluding studies of patients with leg pain

|                               |                               |                               |                               |                               |                               |                               |                               |                    |                               |                               |                    |                            |                               |                    |                            |                    |
|-------------------------------|-------------------------------|-------------------------------|-------------------------------|-------------------------------|-------------------------------|-------------------------------|-------------------------------|--------------------|-------------------------------|-------------------------------|--------------------|----------------------------|-------------------------------|--------------------|----------------------------|--------------------|
| PC (reference)                | <b>0.71</b><br>(0.05,1.38)    |                               | <b>-1.82</b><br>(-2.92,-0.73) |                               |                               |                               | -0.65 (-2.05,0.74)            |                    | 0.30 (-0.53,1.14)             | 0.43 (-0.62,1.48)             |                    |                            | 0.63 (-0.25,1.51)             | 0.56 (-0.48,1.61)  | -0.44 (-1.27,0.39)         |                    |
| 0.56 (-0.01,1.12)             | CBT+PC                        |                               | -0.11 (-1.51,1.28)            |                               |                               |                               |                               |                    | -0.93 (-2.33,0.47)            |                               |                    |                            | 0.08 (-1.43,1.59)             |                    |                            |                    |
| 0.08 (-0.65,0.80)             | -0.48 (-1.33,0.37)            | CP                            | -0.71 (-2.29,0.88)            |                               |                               |                               | -0.08 (-0.88,0.71)            |                    | -0.22 (-1.25,0.81)            | -0.31 (-1.72,1.11)            | -0.30 (-1.76,1.15) |                            |                               |                    |                            |                    |
| <b>-0.81</b><br>(-1.49,-0.13) | <b>-1.36</b><br>(-2.14,-0.59) | <b>-0.88</b><br>(-1.65,-0.12) | No intervention               |                               |                               | <b>0.75</b><br>(0.08,1.42)    | 0.52 (-1.02,2.05)             |                    |                               |                               |                    |                            | <b>2.33</b><br>(1.19,3.48)    |                    | <b>0.81</b><br>(0.19,1.44) |                    |
| <b>1.17</b><br>(0.57,1.76)    | 0.61 (-0.21,1.43)             | <b>1.09</b><br>(0.15,2.03)    | <b>1.98</b><br>(1.07,2.88)    | PE+PC                         |                               |                               |                               |                    |                               |                               |                    |                            |                               |                    |                            |                    |
| -0.05 (-0.81,0.72)            | -0.60 (-1.46,0.26)            | -0.12 (-0.93,0.68)            | <b>0.76</b><br>(0.19,1.33)    | <b>-1.21</b><br>(-2.18,-0.25) | CBT                           | 0.10 (-1.31,1.50)             | -0.34 (-1.75,1.07)            | -0.10 (-1.51,1.30) |                               |                               | 0.02 (-1.38,1.42)  |                            |                               |                    |                            | -0.28 (-1.03,0.47) |
| -0.05 (-1.08,0.97)            | -0.61 (-1.71,0.49)            | -0.13 (-1.17,0.91)            | 0.76 (-0.14,1.65)             | <b>-1.22</b><br>(-2.40,-0.04) | -0.01 (-0.89,0.88)            | Mindfulness                   | -0.44 (-1.84,0.96)            | -0.14 (-1.54,1.26) |                               |                               |                    |                            |                               |                    |                            |                    |
| -0.25 (-1.04,0.54)            | -0.81 (-1.71,0.10)            | -0.33 (-0.99,0.34)            | 0.56 (-0.24,1.35)             | <b>-1.42</b><br>(-2.41,-0.43) | -0.20 (-1.01,0.60)            | -0.20 (-1.19,0.80)            | Usual care                    |                    |                               |                               |                    |                            | <b>-1.55</b><br>(-2.92,-0.17) |                    |                            | 0.41 (-1.00,1.81)  |
| -0.22 (-1.31,0.86)            | -0.78 (-1.94,0.38)            | -0.30 (-1.42,0.82)            | 0.58 (-0.40,1.56)             | <b>-1.39</b><br>(-2.63,-0.15) | -0.18 (-1.10,0.74)            | -0.17 (-1.16,0.82)            | 0.03 (-1.08,1.14)             | Advice             |                               |                               |                    |                            |                               |                    |                            | 0.19 (-1.42,1.81)  |
| 0.03 (-0.61,0.68)             | -0.52 (-1.28,0.24)            | -0.04 (-0.80,0.71)            | 0.84 (-0.00,1.69)             | <b>-1.13</b><br>(-2.01,-0.26) | 0.08 (-0.82,0.98)             | 0.09 (-1.04,1.22)             | 0.29 (-0.60,1.17)             | 0.26 (-0.93,1.45)  | CP+PC                         |                               |                    |                            |                               |                    |                            |                    |
| 0.23 (-0.55,1.01)             | -0.33 (-1.27,0.62)            | 0.15 (-0.76,1.06)             | <b>1.04</b><br>(0.06,2.01)    | -0.94 (-1.92,0.04)            | 0.27 (-0.76,1.30)             | 0.28 (-0.95,1.51)             | 0.48 (-0.54,1.49)             | 0.45 (-0.84,1.74)  | 0.19 (-0.77,1.15)             | PE                            |                    |                            |                               | 0.21 (-1.20,1.62)  |                            |                    |
| -0.12 (-1.29,1.05)            | -0.68 (-1.92,0.57)            | -0.20 (-1.27,0.88)            | 0.69 (-0.44,1.81)             | -1.29 (-2.60,0.03)            | -0.08 (-1.14,0.99)            | -0.07 (-1.39,1.25)            | 0.13 (-1.04,1.30)             | 0.10 (-1.26,1.47)  | -0.16 (-1.39,1.08)            | -0.35 (-1.68,0.98)            | GP care            |                            |                               |                    |                            |                    |
| <b>-1.80</b><br>(-3.38,-0.21) | <b>-2.35</b><br>(-4.00,-0.70) | <b>-1.87</b><br>(-3.40,-0.35) | -0.99 (-2.58,0.60)            | <b>-2.97</b><br>(-4.66,-1.27) | <b>-1.75</b><br>(-3.34,-0.16) | <b>-1.75</b><br>(-3.44,-0.05) | <b>-1.55</b><br>(-2.92,-0.17) | -1.57 (-3.34,0.19) | <b>-1.83</b><br>(-3.47,-0.20) | <b>-2.02</b><br>(-3.73,-0.32) | -1.68 (-3.48,0.13) | Csl                        |                               |                    |                            |                    |
| <b>0.90</b><br>(0.10,1.69)    | 0.34 (-0.54,1.22)             | 0.82 (-0.17,1.81)             | <b>1.70</b><br>(0.83,2.57)    | -0.27 (-1.26,0.72)            | 0.94 (-0.00,1.89)             | 0.95 (-0.23,2.12)             | <b>1.15</b><br>(0.12,2.17)    | 1.12 (-0.10,2.34)  | 0.86 (-0.11,1.84)             | 0.67 (-0.42,1.76)             | 1.02 (-0.31,2.34)  | <b>2.69</b><br>(0.98,4.41) | BT+PC                         |                    |                            | -1.06 (-2.14,0.02) |
| 0.52 (-0.35,1.39)             | -0.04 (-1.07,0.99)            | 0.44 (-0.64,1.53)             | <b>1.33</b><br>(0.24,2.41)    | -0.65 (-1.70,0.40)            | 0.56 (-0.57,1.70)             | 0.57 (-0.75,1.90)             | 0.77 (-0.37,1.91)             | 0.74 (-0.63,2.12)  | 0.48 (-0.58,1.55)             | 0.29 (-0.67,1.26)             | 0.64 (-0.79,2.07)  | <b>2.32</b><br>(0.53,4.11) | -0.38 (-1.55,0.79)            | Mind+PC            |                            |                    |
| -0.17 (-0.85,0.50)            | -0.73 (-1.52,0.07)            | -0.25 (-1.04,0.55)            | <b>0.64</b><br>(0.08,1.20)    | <b>-1.34</b><br>(-2.24,-0.44) | -0.12 (-0.72,0.47)            | -0.12 (-1.06,0.82)            | 0.08 (-0.71,0.88)             | 0.05 (-0.90,1.01)  | -0.21 (-1.06,0.65)            | -0.40 (-1.38,0.58)            | -0.05 (-1.19,1.09) | <b>1.63</b><br>(0.04,3.22) | <b>-1.07</b><br>(-1.92,-0.21) | -0.69 (-1.77,0.39) | BT                         |                    |
| 0.14 (-1.28,1.55)             | -0.42 (-1.94,1.10)            | 0.06 (-1.53,1.65)             | 0.94 (-0.63,2.51)             | -1.03 (-2.57,0.50)            | 0.18 (-1.43,1.79)             | 0.19 (-1.56,1.93)             | 0.39 (-1.23,2.01)             | 0.36 (-1.42,2.14)  | 0.10 (-1.45,1.66)             | -0.09 (-1.71,1.52)            | 0.26 (-1.58,2.09)  | 1.93 (-0.19,4.06)          | -0.76 (-2.38,0.86)            | -0.38 (-2.04,1.28) | 0.31 (-1.26,1.87)          | Csl+PC             |

Results are presented as standardised mean differences (SMD) and 95% confidence intervals. BT+PC: behavioural therapy delivered with physiotherapy care, CBT: cognitive behavioural therapy, CBT+PC: cognitive behavioural therapy delivered with physiotherapy care, CP: combined psychological approaches, CP+PC: combined psychological approaches delivered with physiotherapy care, Csl: counselling, Csl+PC: counselling delivered with physiotherapy care, GP care: general practitioner care, Mind+PC: mindfulness delivered with physiotherapy care, PC: physiotherapy care, PE: pain education, PE+PC: pain education delivered with physiotherapy care. Estimates in bold denote significance at  $p < 0.05$ . SMD values less than 0.00 favour the column-defining treatment node for the NMA results (lower left triangle) and the row-defining treatment nodes for the pairwise meta-analysis results (upper right triangle).

**Supplementary Table 14.16** Pain intensity at post-intervention, excluding studies involving data imputed from median and interquartile ranges

|                         |                    |                            |                            |                            |                         |                         |                    |                         |                    |                         |                    |                            |                            |                         |                   |        |  |  |
|-------------------------|--------------------|----------------------------|----------------------------|----------------------------|-------------------------|-------------------------|--------------------|-------------------------|--------------------|-------------------------|--------------------|----------------------------|----------------------------|-------------------------|-------------------|--------|--|--|
| PC (reference)          |                    |                            |                            |                            |                         |                         |                    |                         |                    |                         |                    |                            |                            |                         |                   |        |  |  |
| 0.14 (-1.47,1.74)       | Csl+PC             |                            |                            |                            |                         |                         |                    |                         |                    |                         |                    |                            |                            |                         |                   |        |  |  |
| <b>1.08 (0.21,1.95)</b> | 0.94 (-0.88,2.77)  | BT+PC                      |                            |                            |                         |                         |                    |                         |                    |                         |                    |                            |                            |                         |                   |        |  |  |
| 0.35 (-0.63,1.34)       | 0.22 (-1.66,2.10)  | -0.73 (-2.04,0.58)         | Mind+PC                    |                            |                         |                         |                    |                         |                    |                         |                    |                            |                            |                         |                   |        |  |  |
| 0.04 (-0.66,0.74)       | -0.10 (-1.85,1.65) | <b>-1.04 (-1.98,-0.11)</b> | -0.32 (-1.51,0.88)         | BT                         |                         |                         |                    |                         |                    |                         |                    |                            |                            |                         |                   |        |  |  |
| -1.69 (-3.48,0.09)      | -1.83 (-4.23,0.57) | <b>-2.77 (-4.71,-0.84)</b> | <b>-2.05 (-4.07,-0.03)</b> | -1.73 (-3.53,0.07)         | Csl                     |                         |                    |                         |                    |                         |                    |                            |                            |                         |                   |        |  |  |
| -0.42 (-1.55,0.71)      | -0.56 (-2.52,1.40) | <b>-1.51 (-2.84,-0.17)</b> | -0.78 (-2.26,0.70)         | -0.46 (-1.57,0.65)         | 1.27 (-0.70,3.24)       | GP care                 |                    |                         |                    |                         |                    |                            |                            |                         |                   |        |  |  |
| 0.19 (-0.68,1.07)       | 0.06 (-1.77,1.88)  | -0.89 (-2.10,0.33)         | -0.16 (-1.26,0.93)         | 0.16 (-0.92,1.23)          | 1.89 (-0.05,3.82)       | 0.62 (-0.75,1.98)       | PE                 |                         |                    |                         |                    |                            |                            |                         |                   |        |  |  |
| 0.13 (-0.51,0.77)       | -0.01 (-1.73,1.72) | -0.95 (-1.99,0.09)         | -0.22 (-1.38,0.93)         | 0.09 (-0.78,0.96)          | <b>1.82 (0.01,3.64)</b> | 0.55 (-0.64,1.75)       | -0.06 (-1.09,0.96) | CP+PC                   |                    |                         |                    |                            |                            |                         |                   |        |  |  |
| 0.00 (-1.17,1.17)       | -0.13 (-2.12,1.85) | -1.08 (-2.42,0.26)         | -0.35 (-1.87,1.17)         | -0.04 (-1.10,1.03)         | 1.70 (-0.30,3.70)       | 0.43 (-0.98,1.83)       | -0.19 (-1.61,1.23) | -0.13 (-1.40,1.14)      | Advice             |                         |                    |                            |                            |                         |                   |        |  |  |
| -0.15 (-1.00,0.70)      | -0.28 (-2.10,1.53) | <b>-1.23 (-2.36,-0.10)</b> | -0.50 (-1.78,0.77)         | -0.18 (-1.07,0.70)         | 1.55 (-0.02,3.11)       | 0.28 (-0.92,1.47)       | -0.34 (-1.47,0.79) | -0.28 (-1.20,0.64)      | -0.15 (-1.39,1.09) | Usual care              |                    |                            |                            |                         |                   |        |  |  |
| 0.14 (-0.96,1.25)       | 0.01 (-1.94,1.95)  | -0.94 (-2.23,0.36)         | -0.21 (-1.67,1.26)         | 0.11 (-0.94,1.15)          | 1.84 (-0.09,3.76)       | 0.57 (-0.79,1.93)       | -0.05 (-1.41,1.31) | 0.02 (-1.18,1.21)       | 0.14 (-0.98,1.27)  | 0.29 (-0.83,1.41)       | Mindfulness        |                            |                            |                         |                   |        |  |  |
| 0.23 (-0.49,0.94)       | 0.09 (-1.66,1.85)  | -0.85 (-1.84,0.13)         | -0.12 (-1.33,1.08)         | 0.19 (-0.41,0.79)          | <b>1.92 (0.13,3.71)</b> | 0.65 (-0.34,1.65)       | 0.04 (-1.04,1.12)  | 0.10 (-0.77,0.97)       | 0.23 (-0.80,1.26)  | 0.38 (-0.49,1.24)       | 0.08 (-0.91,1.08)  | CBT                        |                            |                         |                   |        |  |  |
| <b>0.91 (0.37,1.46)</b> | 0.78 (-0.92,2.47)  | -0.17 (-1.19,0.85)         | 0.56 (-0.57,1.69)          | 0.88 (-0.00,1.75)          | <b>2.61 (0.75,4.47)</b> | <b>1.34 (0.09,2.59)</b> | 0.72 (-0.31,1.75)  | 0.78 (-0.05,1.62)       | 0.91 (-0.37,2.19)  | <b>1.06 (0.06,2.06)</b> | 0.77 (-0.46,1.99)  | 0.68 (-0.21,1.57)          | PE+PC                      |                         |                   |        |  |  |
| -0.62 (-1.32,0.08)      | -0.76 (-2.51,0.99) | <b>-1.70 (-2.65,-0.76)</b> | -0.98 (-2.17,0.22)         | <b>-0.66 (-1.27,-0.05)</b> | 1.07 (-0.73,2.87)       | -0.20 (-1.30,0.90)      | -0.82 (-1.89,0.26) | -0.75 (-1.61,0.11)      | -0.63 (-1.72,0.47) | -0.48 (-1.37,0.41)      | -0.77 (-1.78,0.24) | <b>-0.85 (-1.45,-0.25)</b> | <b>-1.54 (-2.41,-0.66)</b> | No intervention         |                   |        |  |  |
| 0.12 (-0.63,0.86)       | -0.02 (-1.78,1.75) | -0.96 (-2.03,0.11)         | -0.23 (-1.43,0.96)         | 0.08 (-0.77,0.93)          | <b>1.81 (0.08,3.55)</b> | 0.54 (-0.55,1.64)       | -0.07 (-1.08,0.93) | -0.01 (-0.74,0.72)      | 0.12 (-1.12,1.35)  | 0.27 (-0.48,1.01)       | -0.03 (-1.17,1.12) | -0.11 (-0.93,0.71)         | -0.79 (-1.71,0.12)         | 0.74 (-0.08,1.57)       | CP                |        |  |  |
| <b>0.92 (0.42,1.42)</b> | 0.79 (-0.89,2.47)  | -0.16 (-1.09,0.77)         | 0.57 (-0.53,1.67)          | <b>0.89 (0.10,1.67)</b>    | <b>2.62 (0.79,4.44)</b> | <b>1.35 (0.17,2.53)</b> | 0.73 (-0.26,1.72)  | <b>0.79 (0.05,1.54)</b> | 0.92 (-0.29,2.14)  | <b>1.07 (0.14,2.00)</b> | 0.78 (-0.37,1.93)  | 0.69 (-0.09,1.48)          | 0.01 (-0.69,0.71)          | <b>1.55 (0.79,2.31)</b> | 0.80 (-0.03,1.64) | CBT+PC |  |  |

Results are presented as standardised mean differences (SMD) and 95% confidence intervals. BT: behavioural therapy, BT+PC: behavioural therapy delivered with physiotherapy care, CBT: cognitive behavioural therapy, CBT+PC: cognitive behavioural therapy delivered with physiotherapy care, CP: combined psychological approaches, CP+PC: combined psychological approaches delivered with physiotherapy care, Csl: counselling, Csl+PC: counselling delivered with physiotherapy care, GP care: general practitioner care, Mind+PC: Mindfulness delivered with physiotherapy care, NI: no intervention, PC: physiotherapy care, PE: pain education, PE+PC: pain education delivered with physiotherapy care. Estimates in bold denote significance at  $p < 0.05$ . SMD values less than 0.00 favour the column-defining treatment node for the NMA results (lower left triangle) and the row-defining treatment nodes for the pairwise meta-analysis results (upper right triangle).



**Supplementary Table 14.17** Pain intensity at short-term treatment sustainability, excluding studies involving data imputed from median and interquartile ranges

|                                   |                                 |                                   |                                   |                                 |                                   |                                 |                        |                                   |                                   |                                   |                                   |                                   |       |
|-----------------------------------|---------------------------------|-----------------------------------|-----------------------------------|---------------------------------|-----------------------------------|---------------------------------|------------------------|-----------------------------------|-----------------------------------|-----------------------------------|-----------------------------------|-----------------------------------|-------|
| PC<br>(reference)                 |                                 |                                   |                                   |                                 |                                   |                                 |                        |                                   |                                   |                                   |                                   |                                   |       |
| <b>1.04</b><br><b>(0.17,1.91)</b> | PE+PC                           |                                   |                                   |                                 |                                   |                                 |                        |                                   |                                   |                                   |                                   |                                   |       |
| -0.22 (-<br>1.63,1.18)            | -1.26 (-<br>2.88,0.35)          | CBT                               |                                   |                                 |                                   |                                 |                        |                                   |                                   |                                   |                                   |                                   |       |
| -0.36 (-<br>1.85,1.14)            | -1.39 (-<br>3.06,0.27)          | -0.13 (-<br>1.59,1.32)            | Advice                            |                                 |                                   |                                 |                        |                                   |                                   |                                   |                                   |                                   |       |
| 0.47 (-<br>0.69,1.64)             | -0.57 (-<br>1.85,0.72)          | 0.70 (-<br>0.93,2.33)             | 0.83 (-<br>0.67,2.33)             | CBT+PC                          |                                   |                                 |                        |                                   |                                   |                                   |                                   |                                   |       |
| -0.04 (-<br>1.02,0.95)            | -1.08 (-<br>2.35,0.20)          | 0.19 (-<br>1.39,1.76)             | 0.32 (-<br>1.29,1.93)             | -0.51 (-<br>1.80,0.78)          | CP+PC                             |                                 |                        |                                   |                                   |                                   |                                   |                                   |       |
| 0.29 (-<br>1.28,1.87)             | -0.74 (-<br>2.53,1.04)          | 0.52 (-<br>1.39,2.42)             | 0.65 (-<br>1.32,2.62)             | -0.18 (-<br>2.06,1.70)          | 0.33 (-<br>1.43,2.10)             | PE                              |                        |                                   |                                   |                                   |                                   |                                   |       |
| 0.23 (-<br>1.80,2.26)             | -0.81 (-<br>3.02,1.40)          | 0.45 (-<br>2.02,2.92)             | 0.59 (-<br>1.94,3.11)             | -0.24 (-<br>2.59,2.10)          | 0.27 (-<br>1.99,2.53)             | -0.07 (-<br>2.64,2.51)          | Mind+PC                |                                   |                                   |                                   |                                   |                                   |       |
| -0.65 (-<br>1.83,0.53)            | <b>-1.69 (-<br/>3.12,-0.26)</b> | -0.43 (-<br>1.74,0.89)            | -0.29 (-<br>1.68,1.10)            | -1.12 (-<br>2.58,0.34)          | -0.61 (-<br>1.91,0.68)            | -0.94 (-<br>2.52,0.63)          | -0.88 (-<br>3.23,1.47) | CP                                |                                   |                                   |                                   |                                   |       |
| <b>-2.08 (-<br/>3.57,-0.59)</b>   | <b>-3.12 (-<br/>4.82,-1.41)</b> | <b>-1.85 (-<br/>3.24,-0.46)</b>   | -1.72 (-<br>3.44,0.00)            | <b>-2.55 (-<br/>4.30,-0.80)</b> | <b>-2.04 (-<br/>3.70,-0.38)</b>   | <b>-2.37 (-<br/>4.33,-0.41)</b> | -2.31 (-<br>4.83,0.21) | <b>-1.43 (-<br/>2.81,-0.04)</b>   | No<br>intervention                |                                   |                                   |                                   |       |
| -0.47 (-<br>1.81,0.87)            | -1.51 (-<br>3.08,0.06)          | -0.25 (-<br>1.77,1.27)            | -0.12 (-<br>1.75,1.51)            | -0.95 (-<br>2.58,0.68)          | -0.44 (-<br>1.93,1.06)            | -0.77 (-<br>2.56,1.02)          | -0.70 (-<br>3.14,1.73) | 0.18 (-<br>0.86,1.21)             | 1.60 (-<br>0.00,3.21)             | Usual care                        |                                   |                                   |       |
| -1.00 (-<br>2.63,0.63)            | <b>-2.03 (-<br/>3.85,-0.22)</b> | -0.77 (-<br>2.29,0.75)            | -0.64 (-<br>2.40,1.12)            | -1.47 (-<br>3.31,0.37)          | -0.96 (-<br>2.70,0.78)            | -1.29 (-<br>3.27,0.69)          | -1.23 (-<br>3.83,1.38) | -0.35 (-<br>1.61,0.92)            | 1.08 (-<br>0.65,2.81)             | -0.52 (-<br>2.11,1.07)            | GP care                           |                                   |       |
| 0.04 (-<br>1.23,1.31)             | -1.00 (-<br>2.51,0.52)          | 0.26 (-<br>0.92,1.45)             | 0.40 (-<br>1.20,2.00)             | -0.43 (-<br>2.03,1.16)          | 0.08 (-<br>1.42,1.58)             | -0.25 (-<br>2.12,1.61)          | -0.19 (-<br>2.58,2.21) | 0.69 (-<br>0.64,2.03)             | <b>2.12</b><br><b>(0.66,3.58)</b> | 0.51 (-<br>0.92,1.95)             | 1.04 (-<br>0.63,2.70)             | BT                                |       |
| <b>2.16</b><br><b>(0.23,4.09)</b> | 1.12 (-<br>0.98,3.23)           | <b>2.38</b><br><b>(0.29,4.48)</b> | <b>2.52</b><br><b>(0.25,4.79)</b> | 1.69 (-<br>0.50,3.88)           | <b>2.20</b><br><b>(0.08,4.31)</b> | 1.87 (-<br>0.54,4.27)           | 1.93 (-<br>0.87,4.73)  | <b>2.81</b><br><b>(0.74,4.88)</b> | <b>4.24</b><br><b>(2.14,6.34)</b> | <b>2.63</b><br><b>(0.46,4.80)</b> | <b>3.16</b><br><b>(0.83,5.49)</b> | <b>2.12</b><br><b>(0.19,4.05)</b> | BT+PC |

Results are presented as standardised mean differences (SMD) and 95% confidence intervals. BT: behavioural therapy, BT+PC: behavioural therapy delivered with physiotherapy care, CBT: cognitive behavioural therapy, CBT+PC: cognitive behavioural therapy delivered with physiotherapy care, CP: combined psychological approaches, CP+PC: combined psychological approaches delivered with physiotherapy care, GP care: general practitioner care, Mind+PC: mindfulness delivered with physiotherapy care, PC: physiotherapy care, PE: pain education, PE+PC: pain education delivered with physiotherapy care. Estimates in bold denote significance at  $p < 0.05$ . SMD values less than 0.00 favour the column-defining treatment node for the NMA results (lower left triangle) and the row-defining treatment nodes for the pairwise meta-analysis results (upper right triangle).

**Supplementary Table 14.18** Pain intensity at mid-term treatment sustainability, excluding studies involving data imputed from median and interquartile ranges

|                                   |                                   |                                   |                                   |                                   |                                   |                                   |                                      |                                   |                    |                    |                                   |                                   |                                   |                   |       |
|-----------------------------------|-----------------------------------|-----------------------------------|-----------------------------------|-----------------------------------|-----------------------------------|-----------------------------------|--------------------------------------|-----------------------------------|--------------------|--------------------|-----------------------------------|-----------------------------------|-----------------------------------|-------------------|-------|
| PC (reference)                    |                                   |                                   |                                   |                                   |                                   |                                   |                                      |                                   |                    |                    |                                   |                                   |                                   |                   |       |
| <b>0.35</b><br><b>(0.04,0.67)</b> | CBT+PC                            |                                   |                                   |                                   |                                   |                                   |                                      |                                   |                    |                    |                                   |                                   |                                   |                   |       |
| 0.25 (-0.32,0.83)                 | -0.10 (-0.66,0.46)                | Mindfulness                       |                                   |                                   |                                   |                                   |                                      |                                   |                    |                    |                                   |                                   |                                   |                   |       |
| -0.06 (-0.59,0.48)                | -0.41 (-0.95,0.13)                | -0.31 (-0.84,0.22)                | Usual care                        |                                   |                                   |                                   |                                      |                                   |                    |                    |                                   |                                   |                                   |                   |       |
| 0.25 (-0.17,0.66)                 | -0.11 (-0.52,0.31)                | -0.01 (-0.48,0.47)                | 0.30 (-0.15,0.75)                 | CBT                               |                                   |                                   |                                      |                                   |                    |                    |                                   |                                   |                                   |                   |       |
| -0.05 (-0.56,0.46)                | -0.40 (-0.87,0.07)                | -0.30 (-0.78,0.17)                | 0.01 (-0.55,0.56)                 | -0.30 (-0.73,0.14)                | Advice                            |                                   |                                      |                                   |                    |                    |                                   |                                   |                                   |                   |       |
| 0.17 (-0.20,0.53)                 | -0.19 (-0.58,0.21)                | -0.08 (-0.69,0.52)                | 0.22 (-0.31,0.76)                 | -0.08 (-0.55,0.39)                | 0.22 (-0.33,0.77)                 | CP+PC                             |                                      |                                   |                    |                    |                                   |                                   |                                   |                   |       |
| <b>0.75</b><br><b>(0.16,1.34)</b> | 0.40 (-0.27,1.07)                 | 0.50 (-0.32,1.32)                 | <b>0.81</b><br><b>(0.01,1.61)</b> | 0.51 (-0.21,1.23)                 | <b>0.80</b><br><b>(0.02,1.58)</b> | 0.59 (-0.11,1.28)                 | PE                                   |                                   |                    |                    |                                   |                                   |                                   |                   |       |
| -0.10 (-0.61,0.40)                | -0.46 (-1.05,0.14)                | -0.36 (-1.12,0.41)                | -0.05 (-0.78,0.69)                | -0.35 (-1.00,0.30)                | -0.05 (-0.77,0.66)                | -0.27 (-0.89,0.35)                | <b>-0.86</b><br><b>(-1.63,-0.08)</b> | Mind+PC                           |                    |                    |                                   |                                   |                                   |                   |       |
| 0.28 (-0.29,0.84)                 | -0.08 (-0.64,0.49)                | 0.02 (-0.58,0.63)                 | 0.33 (-0.14,0.81)                 | 0.03 (-0.44,0.49)                 | 0.32 (-0.27,0.92)                 | 0.11 (-0.46,0.67)                 | -0.48 (-1.29,0.34)                   | 0.38 (-0.38,1.13)                 | GP care            |                    |                                   |                                   |                                   |                   |       |
| 0.20 (-0.75,1.15)                 | -0.16 (-1.11,0.79)                | -0.06 (-1.03,0.92)                | 0.25 (-0.71,1.22)                 | -0.05 (-0.90,0.80)                | 0.24 (-0.71,1.20)                 | 0.03 (-0.95,1.00)                 | -0.56 (-1.68,0.56)                   | 0.30 (-0.77,1.37)                 | -0.08 (-1.05,0.89) | Csl                |                                   |                                   |                                   |                   |       |
| -0.01 (-0.73,0.71)                | -0.36 (-1.08,0.35)                | -0.26 (-1.01,0.49)                | 0.05 (-0.69,0.79)                 | -0.25 (-0.84,0.33)                | 0.04 (-0.69,0.77)                 | -0.18 (-0.93,0.57)                | -0.76 (-1.69,0.17)                   | 0.10 (-0.78,0.97)                 | -0.28 (-1.03,0.46) | -0.20 (-0.83,0.42) | No intervention                   |                                   |                                   |                   |       |
| 0.07 (-0.44,0.58)                 | -0.28 (-0.80,0.23)                | -0.18 (-0.74,0.37)                | 0.13 (-0.21,0.46)                 | -0.18 (-0.62,0.27)                | 0.12 (-0.44,0.68)                 | -0.10 (-0.58,0.39)                | -0.68 (-1.46,0.10)                   | 0.17 (-0.54,0.89)                 | -0.21 (-0.60,0.18) | -0.13 (-1.09,0.84) | 0.08 (-0.66,0.81)                 | CP                                |                                   |                   |       |
| 0.32 (-0.18,0.81)                 | -0.04 (-0.55,0.47)                | 0.06 (-0.54,0.67)                 | 0.37 (-0.21,0.95)                 | 0.07 (-0.33,0.47)                 | 0.36 (-0.20,0.93)                 | 0.15 (-0.41,0.70)                 | -0.44 (-1.21,0.33)                   | 0.42 (-0.29,1.13)                 | 0.04 (-0.56,0.64)  | 0.12 (-0.82,1.06)  | 0.32 (-0.38,1.03)                 | 0.25 (-0.32,0.82)                 | BT                                |                   |       |
| 0.41 (-0.13,0.95)                 | 0.06 (-0.57,0.68)                 | 0.16 (-0.63,0.94)                 | 0.47 (-0.29,1.23)                 | 0.16 (-0.52,0.84)                 | 0.46 (-0.28,1.20)                 | 0.24 (-0.41,0.89)                 | -0.34 (-0.91,0.23)                   | 0.51 (-0.22,1.25)                 | 0.13 (-0.64,0.91)  | 0.21 (-0.88,1.31)  | 0.42 (-0.48,1.32)                 | 0.34 (-0.40,1.08)                 | 0.09 (-0.64,0.82)                 | PE+PC             |       |
| <b>1.03</b><br><b>(0.44,1.63)</b> | <b>0.68</b><br><b>(0.07,1.29)</b> | <b>0.78</b><br><b>(0.02,1.55)</b> | <b>1.09</b><br><b>(0.35,1.83)</b> | <b>0.79</b><br><b>(0.14,1.43)</b> | <b>1.08</b><br><b>(0.36,1.80)</b> | <b>0.87</b><br><b>(0.20,1.53)</b> | 0.28 (-0.56,1.12)                    | <b>1.14</b><br><b>(0.36,1.92)</b> | 0.76 (-0.00,1.52)  | 0.84 (-0.23,1.91)  | <b>1.04</b><br><b>(0.17,1.91)</b> | <b>0.96</b><br><b>(0.24,1.69)</b> | <b>0.72</b><br><b>(0.07,1.37)</b> | 0.62 (-0.18,1.43) | BT+PC |

Results are presented as standardised mean differences (SMD) and 95% confidence intervals. BT: behavioural therapy, BT+PC: behavioural therapy delivered with physiotherapy care, CBT: cognitive behavioural therapy, CBT+PC: cognitive behavioural therapy delivered with physiotherapy care, CP: combined psychological approaches, CP+PC: combined psychological approaches delivered with physiotherapy care, Csl: counselling, GP care: general practitioner care, Mind+PC: mindfulness delivered with physiotherapy care, PC: physiotherapy care, PE: pain education, PE+PC: pain education delivered with physiotherapy care. Estimates in bold denote significance at  $p < 0.05$ . SMD values less than 0.00 favour the column-defining treatment node for the NMA results (lower left triangle) and the row-defining treatment nodes for the pairwise meta-analysis results (upper right triangle).

**Supplementary Table 14.19** Pain intensity at short-term treatment sustainability, removing portions of the evidence in the network to address inconsistency

|                         |                            |                            |                    |                            |                    |                            |                    |                    |                    |                    |                            |                    |
|-------------------------|----------------------------|----------------------------|--------------------|----------------------------|--------------------|----------------------------|--------------------|--------------------|--------------------|--------------------|----------------------------|--------------------|
| PC (reference)          | <b>1.20 (0.68,1.71)</b>    |                            |                    | 0.10 (-1.04,1.24)          | 0.16 (-0.53,0.85)  | <b>1.30 (0.15,2.46)</b>    |                    |                    |                    | -0.24 (-1.38,0.90) |                            | -0.19 (-1.30,0.92) |
| <b>1.06 (0.56,1.55)</b> | PE+PC                      |                            |                    | 0.32 (-0.83,1.46)          |                    |                            |                    |                    |                    |                    |                            |                    |
| 0.53 (-0.37,1.44)       | -0.52 (-1.53,0.49)         | CBT                        | -0.20 (-1.35,0.96) |                            |                    |                            |                    |                    | -0.30 (-1.44,0.84) |                    | <b>-1.97 (-3.34,-0.59)</b> | 0.00 (-0.87,0.87)  |
| 0.24 (-0.63,1.11)       | -0.81 (-1.78,0.15)         | -0.29 (-1.12,0.54)         | Advice             | 0.37 (-0.80,1.55)          |                    |                            |                    | 0.09 (-1.05,1.23)  |                    |                    |                            |                    |
| <b>0.67 (0.01,1.33)</b> | -0.38 (-1.11,0.35)         | 0.14 (-0.84,1.12)          | 0.43 (-0.42,1.29)  | CBT+PC                     | -0.48 (-1.64,0.68) |                            |                    |                    |                    |                    |                            |                    |
| 0.17 (-0.39,0.73)       | <b>-0.88 (-1.61,-0.16)</b> | -0.36 (-1.32,0.60)         | -0.07 (-0.98,0.84) | -0.50 (-1.22,0.22)         | CP+PC              |                            |                    | 0.00 (-1.17,1.17)  |                    |                    |                            |                    |
| 0.70 (-0.21,1.61)       | -0.35 (-1.38,0.67)         | 0.17 (-0.96,1.30)          | 0.46 (-0.65,1.57)  | 0.03 (-1.04,1.09)          | 0.53 (-0.47,1.53)  | PE                         |                    | 0.04 (-1.07,1.15)  |                    |                    |                            |                    |
| 0.41 (-0.42,1.23)       | -0.65 (-1.61,0.31)         | -0.13 (-1.35,1.09)         | 0.16 (-1.03,1.36)  | -0.27 (-1.32,0.79)         | 0.24 (-0.76,1.23)  | -0.30 (-1.52,0.93)         | Mind+PC            |                    |                    |                    |                            |                    |
| 0.18 (-0.53,0.90)       | <b>-0.87 (-1.72,-0.03)</b> | -0.35 (-1.14,0.43)         | -0.06 (-0.83,0.71) | -0.49 (-1.33,0.34)         | 0.01 (-0.74,0.76)  | -0.52 (-1.42,0.38)         | -0.22 (-1.31,0.87) | CP                 | 0.00 (-1.18,1.18)  | 0.02 (-0.65,0.69)  |                            | -0.28 (-1.35,0.79) |
| 0.21 (-0.86,1.28)       | -0.85 (-2.01,0.31)         | -0.33 (-1.20,0.55)         | -0.03 (-1.09,1.03) | -0.46 (-1.61,0.68)         | 0.04 (-1.07,1.15)  | -0.49 (-1.73,0.74)         | -0.20 (-1.55,1.15) | 0.03 (-0.86,0.92)  | No intervention    |                    |                            |                    |
| 0.14 (-0.65,0.93)       | <b>-0.91 (-1.83,-0.00)</b> | -0.39 (-1.27,0.49)         | -0.10 (-1.00,0.80) | -0.53 (-1.45,0.39)         | -0.03 (-0.88,0.82) | -0.56 (-1.58,0.46)         | -0.26 (-1.40,0.87) | -0.04 (-0.62,0.54) | -0.07 (-1.09,0.95) | Usual care         |                            | 0.05 (-1.11,1.22)  |
| -0.61 (-1.73,0.51)      | <b>-1.67 (-2.88,-0.46)</b> | <b>-1.15 (-2.15,-0.14)</b> | -0.85 (-1.98,0.27) | <b>-1.29 (-2.48,-0.09)</b> | -0.78 (-1.94,0.37) | <b>-1.32 (-2.59,-0.04)</b> | -1.02 (-2.41,0.37) | -0.80 (-1.73,0.13) | -0.82 (-2.01,0.37) | -0.76 (-1.82,0.31) | GP care                    |                    |
| 0.30 (-0.59,1.19)       | -0.75 (-1.75,0.25)         | -0.23 (-0.97,0.51)         | 0.06 (-0.90,1.02)  | -0.37 (-1.38,0.64)         | 0.13 (-0.84,1.10)  | -0.40 (-1.55,0.75)         | -0.10 (-1.31,1.11) | 0.12 (-0.73,0.97)  | 0.09 (-0.96,1.15)  | 0.16 (-0.71,1.04)  | 0.92 (-0.22,2.05)          | BT                 |

Results are presented as standardised mean differences (SMD) and 95% confidence intervals. BT: behavioural therapy, BT+PC: behavioural therapy delivered with physiotherapy care, CBT: cognitive behavioural therapy, CBT+PC: cognitive behavioural therapy delivered with physiotherapy care, CP: combined psychological approaches, CP+PC: combined psychological approaches delivered with physiotherapy care, GP care: general practitioner care, Mind+PC: mindfulness delivered with physiotherapy care, PC: physiotherapy care, PE: pain education, PE+PC: pain education delivered with physiotherapy care. Estimates in bold denote significance at  $p < 0.05$ . SMD values less than 0.00 favour the column-defining treatment node for the NMA results (lower left triangle) and the row-defining treatment nodes for the pairwise meta-analysis results (upper right triangle).

Final results of global test for inconsistency:  $\chi^2 = 7.25$ ,  $p = 0.51$ . No local inconsistency was detected in the side-splitting approach.

#### Justification:

To examine the possible cause(s) of inconsistency for pain intensity at short-term treatment sustainability, we first examined the studies contributing to the sides demonstrating  $p < 0.05$  from the side-splitting approach. The affected sides were 02 10 (physiotherapy care compared with no intervention), 02 14 (physiotherapy care compared with behavioural therapy delivered with physiotherapy care), 03 10 (cognitive behavioural therapy compared with no intervention), 10 13 (no intervention compared with behavioural therapy), 10 14 (no intervention compared with behavioural therapy delivered with physiotherapy care). We identified that Shariat et al. (2019),[77] was a common article contributing to all affected comparisons. We performed sensitivity analysis excluding this study to examine the impact on the degree of inconsistency. The global inconsistency test returned a result of  $\chi^2 = 9.38$ ,  $p = 0.31$ ; however, local inconsistency was still detected in the sides 03 12 (cognitive behavioural therapy compared with general practitioner care) and 09 12 (combined psychological approaches compared with general practitioner care) from the side-splitting approach.

We subsequently visually inspected possible causes of intransitivity across the three studies directly contributing to these comparisons. We identified that Tavafian et al. (2017)[85] was potentially contributing to inconsistency due to intransience related to intervention duration. Intervention duration for the other studies were 2 to 3 weeks[53] and 12 to 24 weeks,[81] whilst Tavafian et al. (2017)[85] involved a one-week intervention post-randomisation with monthly booster counselling sessions between 24 to 30 months post-intervention.[85] We examined the impact of further excluding Tavafian et al. (2017)[85], and found that that global inconsistency ( $\chi^2 = 7.25$ ,  $p = 0.51$ ) and local inconsistency were removed entirely.

As seen, the exclusion of Shariat et al. (2019)[77] resulted in behavioural therapy delivered with physiotherapy care (treatment node) becoming disconnected from the network. We recognise that this comparison resulted in statistically important findings from our primary analyses of pain intensity at both post-intervention and short-term treatment sustainability, from which our main conclusions were previously drawn in our initial manuscript submission. However, given that the current sensitivity analysis does not indicate important global or local inconsistency affecting the results, we have revised our discussion accordingly. Further studies should examine the robustness of effect estimates comparing behavioural therapy delivered with physiotherapy care, with physiotherapy care, at short-term treatment sustainability for pain intensity.

Nonetheless, effect estimates for pain education delivered with physiotherapy care compared with physiotherapy care remained very similar to those obtained in the primary analysis in terms of the magnitude of the effect and clinical significance. Also, effect estimates for cognitive behavioural therapy delivered with physiotherapy care remained similar in magnitude to the primary analysis; however, results became statistically significant in the sensitivity analyses, potentially suggesting that the effect of cognitive behavioural therapy delivered with physiotherapy care is sustained at least until short-term follow-up, and findings are not due to chance.

## Supplementary O. Assessment of global inconsistency

Results of global inconsistency tests for the primary analysis are presented below in Supplementary Table 15.

**Supplementary Table 15.** Results of global inconsistency tests for the primary analyses

| <b>Time-point</b>                   | <b>Physical Function</b>                   | <b>Pain Intensity</b>                      |
|-------------------------------------|--------------------------------------------|--------------------------------------------|
| Post-intervention                   | $\text{chi}^2 = 6.51, p = 0.99$            | $\text{chi}^2 = 10.07, p = 0.97$           |
| Short-term treatment sustainability | $\text{chi}^2 = 21.33, p < \mathbf{0.001}$ | $\text{chi}^2 = 43.46, p < \mathbf{0.001}$ |
| Mid-term treatment sustainability   | $\text{chi}^2 = 28.75, p < \mathbf{0.001}$ | $\text{chi}^2 = 11.98, p = 0.29$           |
| Long-term treatment sustainability  | $\text{chi}^2 = 1.18, p = 0.28$            | $\text{chi}^2 = 1.12, p = 0.77$            |

Estimates in bold denote significance at  $p < 0.05$ .

Results of global inconsistency tests for sensitivity analyses conducted to address inconsistency are presented below in Supplementary Table 16.

**Supplementary Table 16.** Results of global inconsistency tests for the sensitivity analyses conducted to address inconsistency

| <b>Time-point</b>                   | <b>Physical Function</b>        | <b>Pain Intensity</b>           |
|-------------------------------------|---------------------------------|---------------------------------|
| Short-term treatment sustainability | $\text{chi}^2 = 1.92, p = 0.75$ | $\text{chi}^2 = 7.25, p = 0.51$ |
| Mid-term treatment sustainability   | $\text{chi}^2 = 1.92, p = 0.78$ | N/A                             |

Estimates in bold denote significance at  $p < 0.05$ .

**Supplementary P. Results of side-splitting method for physical function and pain intensity**

**Supplementary Table 17.1** Physical function at post-intervention

| <b>Side</b> | <b>Direct Coef.</b> | <b>SE</b> | <b>Indirect Coef.</b> | <b>SE</b> | <b>p</b> |
|-------------|---------------------|-----------|-----------------------|-----------|----------|
| 02 03       | 0.03                | 0.35      | -0.56                 | 0.42      | 0.28     |
| 02 06       | -0.78               | 0.31      | -0.07                 | 0.59      | 0.29     |
| 02 08       | 0.17                | 0.69      | -0.17                 | 0.47      | 0.68     |
| 02 09       | -0.13               | 0.70      | -0.49                 | 0.42      | 0.66     |
| 02 12       | -0.20               | 0.51      | -0.12                 | 0.45      | 0.91     |
| 02 15       | 0.18                | 0.69      | -0.16                 | 0.54      | 0.70     |
| 02 16       | -0.26               | 0.75      | -0.18                 | 0.78      | 0.95     |
| 02 17       | -0.16               | 0.67      | -1.81                 | 0.74      | 0.10     |
| 01 02       | 1.14                | 0.25      | 0.58                  | 0.46      | 0.28     |
| 01 03       | 0.68                | 0.69      | 0.84                  | 0.36      | 0.85     |
| 01 05       | 0.04                | 0.70      | 1.15                  | 0.50      | 0.20     |
| 01 06       | 0.39                | 0.71      | 0.39                  | 0.38      | 1.00     |
| 01 09       | -0.12               | 0.68      | 0.92                  | 0.44      | 0.20     |
| 03 04       | 0.03                | 0.41      | -0.40                 | 0.51      | 0.52     |
| 03 11       | 0.14                | 0.73      | 0.42                  | 632.26    | 1.00     |
| 03 12       | 0.38                | 0.68      | -0.07                 | 0.43      | 0.57     |
| 04 05       | 0.74                | 0.77      | -0.14                 | 0.49      | 0.34     |
| 04 08       | 0.21                | 0.40      | 0.45                  | 0.58      | 0.73     |
| 04 12       | 0.36                | 0.70      | 0.12                  | 0.47      | 0.78     |
| 04 13       | 0.14                | 0.71      | 0.00                  | 0.80      | 0.89     |
| 05 09       | -0.21               | 0.40      | -0.04                 | 0.62      | 0.82     |
| 05 15       | 0.02                | 0.73      | 0.30                  | 0.55      | 0.77     |
| 06 17       | -1.06               | 0.68      | 0.60                  | 0.73      | 0.10     |
| 07 08       | 0.37                | 0.68      | 0.23                  | 0.85      | 0.90     |
| 07 09       | 0.01                | 0.68      | -0.05                 | 0.75      | 0.96     |
| 07 10       | 0.30                | 0.68      | 0.41                  | 0.76      | 0.91     |
| 08 09       | -0.36               | 0.68      | -0.31                 | 0.48      | 0.96     |
| 08 14       | 0.20                | 0.67      | 0.12                  | 631.65    | 1.00     |
| 08 15       | 0.01                | 0.69      | 0.05                  | 0.59      | 0.96     |
| 09 10       | 0.04                | 0.68      | 0.56                  | 0.54      | 0.55     |
| 09 13       | 0.06                | 0.68      | 0.21                  | 0.82      | 0.89     |
| 09 15       | 0.35                | 0.50      | 0.37                  | 0.55      | 0.97     |
| 10 12       | -0.55               | 0.72      | 0.20                  | 0.63      | 0.44     |
| 10 15       | 0.00                | 0.80      | -0.01                 | 0.58      | 1.00     |
| 12 16       | -0.04               | 0.69      | -0.11                 | 0.83      | 0.95     |

01: cognitive behavioural therapy delivered with physiotherapy care, 02: physiotherapy care, 03: combined psychological approaches delivered with physiotherapy care, 04: combined psychological approaches, 05: no intervention, 06: pain education delivered with physiotherapy care, 07: mindfulness, 08: usual care, 09: cognitive behavioural therapy, 10: advice, 11: behavioural therapy delivered with physiotherapy care, 12: pain education, 13: general practitioner care, 14: counselling, 15: behavioural therapy, 16: mindfulness delivered with physiotherapy care, 17: counselling delivered with physiotherapy care. Direct Coef.: direct coefficient, SE: standard error, Indirect Coef.: indirect coefficient. Estimates in bold denote significance at  $p < 0.05$ .

**Supplementary Table 17.2** Physical function at short-term treatment sustainability

| Side  | Direct Coef. | SE   | Indirect Coef. | SE     | <i>p</i>    |
|-------|--------------|------|----------------|--------|-------------|
| 02 05 | -0.14        | 0.23 | -1.07          | 0.24   | <b>0.01</b> |
| 02 06 | -0.21        | 0.23 | -0.47          | 0.30   | 0.50        |
| 02 07 | -1.01        | 0.38 | 0.06           | 0.28   | <b>0.02</b> |
| 02 08 | .            | .    | .              | .      | .           |
| 02 11 | 0.02         | 0.39 | -0.16          | 0.39   | 0.75        |
| 02 13 | 0.11         | 0.39 | -0.24          | 1.04   | 0.75        |
| 01 02 | 0.83         | 0.18 | -0.35          | 0.40   | <b>0.01</b> |
| 01 05 | -0.73        | 0.36 | 0.45           | 0.26   | <b>0.01</b> |
| 03 04 | -0.01        | 0.39 | 0.03           | 0.76   | 0.97        |
| 03 10 | 0.27         | 0.37 | 0.23           | 0.76   | 0.97        |
| 04 05 | -0.33        | 0.40 | -0.29          | 0.75   | 0.97        |
| 05 06 | 0.46         | 0.38 | 0.19           | 0.30   | 0.57        |
| 06 07 | 0.26         | 0.36 | -0.32          | 0.34   | 0.24        |
| 06 09 | 0.13         | 0.39 | -0.06          | 0.34   | 0.72        |
| 07 09 | -0.16        | 0.40 | 0.27           | 0.39   | 0.45        |
| 09 10 | 0.26         | 0.40 | 0.30           | 0.75   | 0.97        |
| 09 11 | 0.18         | 0.22 | 0.36           | 0.51   | 0.75        |
| 09 12 | 0.12         | 0.26 | 0.56           | 443.23 | 1.00        |
| 11 13 | 0.10         | 0.39 | 0.45           | 1.04   | 0.75        |

01: pain education delivered with physiotherapy care, 02: physiotherapy care, 03: cognitive behavioural therapy, 04: advice, 05: cognitive behavioural therapy delivered with physiotherapy care, 06: combined psychological approaches delivered with physiotherapy care, 07: pain education, 08: mindfulness delivered with physiotherapy care, 09: combined psychological approaches, 10: no intervention, 11: usual care, 12: general practitioner care, 13: behavioural therapy. Direct Coef.: direct coefficient, SE: standard error, Indirect Coef.: indirect coefficient. Estimates in bold denote significance at  $p < 0.05$ .

**Supplementary Table 17.3** Physical function at mid-term treatment sustainability

| Side  | Direct Coef. | SE   | Indirect Coef. | SE     | <i>p</i>         |
|-------|--------------|------|----------------|--------|------------------|
| 02 05 | -0.11        | 0.28 | -0.22          | 0.24   | 0.76             |
| 02 07 | -0.45        | 0.19 | -0.36          | 0.20   | 0.76             |
| 02 08 | -0.91        | 0.28 | 0.04           | 0.22   | <b>0.01</b>      |
| 02 09 | .            | .    | .              | .      | .                |
| 01 02 | 0.23         | 0.10 | 0.91           | 0.22   | <b>0.01</b>      |
| 01 05 | -0.23        | 0.25 | 0.43           | 0.20   | <b>0.04</b>      |
| 01 06 | 0.37         | 0.27 | 0.15           | 0.28   | 0.57             |
| 01 07 | 0.42         | 0.19 | -0.30          | 0.14   | <b>&lt;0.001</b> |
| 03 04 | 0.29         | 0.25 | 0.40           | 0.39   | 0.82             |
| 03 05 | -0.01        | 0.25 | 0.04           | 0.30   | 0.90             |
| 03 06 | 0.14         | 0.24 | 0.05           | 0.30   | 0.83             |
| 04 05 | -0.30        | 0.25 | -0.32          | 0.26   | 0.96             |
| 04 10 | -0.31        | 0.15 | -0.26          | 0.32   | 0.89             |
| 05 06 | -0.03        | 0.25 | 0.21           | 0.24   | 0.48             |
| 05 11 | 0.26         | 0.25 | 0.39           | 0.28   | 0.72             |
| 05 13 | 0.25         | 0.21 | 0.31           | 279.69 | 1.00             |

|       |       |      |       |        |             |
|-------|-------|------|-------|--------|-------------|
| 05 14 | 0.37  | 0.30 | 0.34  | 620.96 | 1.00        |
| 07 08 | 0.33  | 0.19 | -0.61 | 0.31   | <b>0.01</b> |
| 07 10 | 0.29  | 0.18 | 0.10  | 0.31   | 0.61        |
| 08 15 | -0.31 | 0.29 | 0.71  | 614.07 | 1.00        |
| 10 11 | 0.34  | 0.18 | 0.21  | 0.32   | 0.72        |
| 12 13 | 0.22  | 0.24 | 0.16  | 645.50 | 1.00        |

01: cognitive behavioural therapy delivered with physiotherapy care, 02: physiotherapy care, 03: mindfulness, 04: usual care, 05: cognitive behavioural therapy, 06: advice, 07: combined psychological approaches delivered with physiotherapy care, 08: pain education, 09: mindfulness delivered with physiotherapy care, 10: combined psychological approaches, 11: general practitioner care, 12: counselling, 13: no intervention, 14: behavioural therapy, 15: pain education delivered with physiotherapy care. Direct Coef.: direct coefficient, SE: standard error, Indirect Coef.: indirect coefficient. Estimates in bold denote significance at  $p < 0.05$ .

**Supplementary Table 17.4** Physical function at long-term treatment sustainability

| Side  | Direct Coef. | SE   | Indirect Coef. | SE     | <i>p</i> |
|-------|--------------|------|----------------|--------|----------|
| 02 03 | -1.56        | 0.85 | 0.96           | 258.43 | 0.99     |
| 02 04 | -0.09        | 1.84 | -4.58          | 3.69   | 0.28     |
| 01 02 | .            | .    | .              | .      | .        |
| 03 04 | -0.33        | 1.84 | 4.16           | 3.69   | 0.28     |
| 04 05 | 0.20         | 1.88 | 1.55           | 138.05 | 0.99     |
| 05 10 | -0.65        | 1.88 | 0.78           | 153.43 | 0.99     |
| 06 07 | 0.19         | 1.88 | -2.88          | 632.64 | 1.00     |
| 07 10 | 0.00         | 1.89 | -1.81          | 282.84 | 1.00     |
| 08 09 | 0.26         | 1.87 | -2.29          | 632.44 | 1.00     |
| 09 10 | -0.30        | 1.88 | -1.84          | 282.93 | 1.00     |

01: combined psychological approaches delivered with physiotherapy care, 02: physiotherapy care, 03: cognitive behavioural therapy delivered with physiotherapy care, 04: cognitive behavioural therapy, 05: general practitioner care, 06: counselling, 07: no intervention, 08: pain education, 09: usual care, 10: combined psychological approaches. Direct Coef.: direct coefficient, SE: standard error, Indirect Coef.: indirect coefficient. Estimates in bold denote significance at  $p < 0.05$ .

**Supplementary Table 17.5** Pain intensity at post-intervention

| Side  | Direct Coef. | SE   | Indirect Coef. | SE   | <i>p</i>    |
|-------|--------------|------|----------------|------|-------------|
| 02 04 | 1.90         | 0.61 | 0.01           | 0.41 | <b>0.01</b> |
| 02 05 | -0.92        | 0.29 | -0.86          | 0.87 | 0.95        |
| 02 06 | -0.22        | 0.81 | -0.23          | 0.41 | 0.99        |
| 02 08 | 0.65         | 0.80 | -0.06          | 0.51 | 0.45        |
| 02 10 | -0.28        | 0.41 | 0.12           | 0.53 | 0.55        |
| 02 11 | -0.42        | 0.59 | 0.04           | 0.65 | 0.60        |
| 02 14 | 0.45         | 0.47 | -0.64          | 0.51 | 0.12        |
| 02 15 | -0.42        | 0.49 | -0.42          | 0.95 | 1.00        |
| 02 16 | -0.64        | 0.49 | -2.73          | 0.97 | 0.05        |
| 02 17 | .            | .    | .              | .    | .           |



|       |       |      |       |        |      |
|-------|-------|------|-------|--------|------|
| 01 02 | 1.12  | 0.29 | 0.37  | 0.50   | 0.20 |
| 01 04 | 0.11  | 0.80 | 1.93  | 0.42   | 0.05 |
| 01 05 | 0.06  | 0.82 | 0.00  | 0.40   | 0.95 |
| 01 06 | -0.21 | 0.80 | 0.98  | 0.45   | 0.19 |
| 01 10 | 0.93  | 0.80 | 0.75  | 0.43   | 0.85 |
| 01 16 | -0.08 | 0.85 | -0.19 | 0.57   | 0.92 |
| 03 04 | 0.71  | 0.88 | 0.76  | 0.48   | 0.96 |
| 03 08 | 0.08  | 0.46 | 0.65  | 0.66   | 0.48 |
| 03 10 | 0.14  | 0.47 | -0.26 | 0.61   | 0.60 |
| 03 11 | 0.31  | 0.81 | -0.34 | 0.65   | 0.53 |
| 03 12 | 0.30  | 0.82 | 0.75  | 0.76   | 0.69 |
| 04 06 | -0.76 | 0.38 | -1.03 | 0.52   | 0.67 |
| 04 07 | -0.52 | 0.86 | -0.91 | 0.64   | 0.72 |
| 04 14 | -0.84 | 0.35 | -0.07 | 0.64   | 0.29 |
| 04 16 | -2.41 | 0.63 | -0.73 | 0.73   | 0.09 |
| 06 07 | -0.10 | 0.80 | 0.21  | 0.65   | 0.77 |
| 06 08 | 0.34  | 0.80 | 0.39  | 0.53   | 0.96 |
| 06 09 | 0.10  | 0.80 | 0.32  | 0.70   | 0.84 |
| 06 12 | 0.78  | 0.60 | 0.33  | 0.94   | 0.69 |
| 06 14 | 0.20  | 0.38 | 0.18  | 0.52   | 0.97 |
| 07 08 | 0.44  | 0.80 | 0.14  | 0.82   | 0.79 |
| 07 09 | 0.14  | 0.80 | 0.15  | 0.83   | 1.00 |
| 08 13 | 1.55  | 0.79 | -0.29 | 628.96 | 1.00 |
| 08 14 | -0.41 | 0.80 | -0.08 | 0.54   | 0.74 |
| 09 14 | -0.19 | 0.90 | 0.05  | 0.68   | 0.83 |
| 11 15 | -0.21 | 0.80 | -0.21 | 0.70   | 1.00 |
| 14 16 | -1.08 | 0.60 | -0.98 | 0.76   | 0.92 |

01: cognitive behavioural therapy delivered with physiotherapy care, 02: physiotherapy care, 03: combined psychological approaches, 04: no intervention, 05: pain education delivered with physiotherapy care, 06: cognitive behavioural therapy, 07: mindfulness, 08: usual care, 09: advice, 10: combined psychological approaches delivered with physiotherapy care, 11: pain education, 12: general practitioner care, 13: counselling, 14: behavioural therapy, 15: mindfulness delivered with physiotherapy care, 16: behavioural therapy delivered with physiotherapy care, 17: counselling delivered with physiotherapy care. Direct Coef.: direct coefficient, SE: standard error, Indirect Coef.: indirect coefficient. Estimates in bold denote significance at  $p < 0.05$ .

**Supplementary Table 17.6** Pain intensity at short-term treatment sustainability

| Side  | Direct Coef. | SE   | Indirect Coef. | SE   | <i>p</i>         |
|-------|--------------|------|----------------|------|------------------|
| 02 05 | -0.10        | 1.04 | -0.65          | 0.72 | 0.66             |
| 02 06 | -0.16        | 0.60 | 0.48           | 0.91 | 0.56             |
| 02 07 | -1.30        | 1.00 | 1.06           | 1.17 | 0.12             |
| 02 08 | .            | .    | .              | .    | .                |
| 02 10 | 5.15         | 0.88 | -0.10          | 0.64 | <b>&lt;0.001</b> |
| 02 11 | 0.24         | 1.04 | 0.65           | 0.91 | 0.77             |
| 02 13 | 0.36         | 0.73 | -1.19          | 1.23 | 0.28             |
| 02 14 | -1.08        | 0.95 | -6.57          | 1.96 | <b>0.01</b>      |
| 01 02 | 1.22         | 0.46 | -0.22          | 1.22 | 0.27             |

|       |       |      |       |      |                  |
|-------|-------|------|-------|------|------------------|
| 01 05 | -0.32 | 1.02 | 1.12  | 0.81 | 0.27             |
| 03 04 | 0.20  | 1.04 | 0.07  | 1.06 | 0.93             |
| 03 10 | 0.30  | 0.93 | 3.14  | 0.89 | <b>0.03</b>      |
| 03 12 | 1.97  | 1.07 | -0.30 | 1.00 | 0.12             |
| 03 13 | 0.00  | 0.75 | -0.73 | 1.00 | 0.56             |
| 04 05 | -0.37 | 1.04 | -1.36 | 1.12 | 0.52             |
| 04 09 | -0.09 | 1.03 | 0.64  | 0.97 | 0.61             |
| 05 06 | 0.48  | 1.04 | 0.53  | 0.85 | 0.97             |
| 06 09 | 0.00  | 1.03 | 1.02  | 0.85 | 0.44             |
| 07 09 | -0.04 | 0.99 | 2.32  | 1.18 | 0.12             |
| 09 10 | 0.00  | 0.97 | 2.56  | 0.89 | 0.05             |
| 09 11 | -0.02 | 0.60 | -0.70 | 1.11 | 0.59             |
| 09 12 | -0.16 | 0.69 | 2.10  | 1.29 | 0.12             |
| 10 13 | -4.44 | 0.99 | -0.46 | 0.77 | <b>&lt;0.001</b> |
| 10 14 | -6.54 | 0.89 | 3.69  | 1.45 | <b>&lt;0.001</b> |
| 11 13 | -0.05 | 1.03 | -0.97 | 1.03 | 0.53             |
| 13 14 | -1.61 | 1.07 | -4.14 | 2.12 | 0.28             |

01: pain education delivered with physiotherapy care, 02: physiotherapy care, 03: cognitive behavioural therapy, 04: advice, 05: cognitive behavioural therapy delivered with physiotherapy care, 06: combined psychological approaches delivered with physiotherapy care, 07: pain education, 08: mindfulness delivered with physiotherapy care, 09: combined psychological approaches, 10: no intervention, 11: usual care, 12: general practitioner care, 13: behavioural therapy, 14: behavioural therapy delivered with physiotherapy care. Direct Coef.: direct coefficient, SE: standard error, Indirect Coef.: indirect coefficient. Estimates in bold denote significance at  $p < 0.05$ .

**Supplementary Table 17.7** Pain intensity at mid-term treatment sustainability

| Side  | Direct Coef. | SE   | Indirect Coef. | SE     | <i>p</i>    |
|-------|--------------|------|----------------|--------|-------------|
| 02 05 | -0.05        | 0.35 | -0.30          | 0.27   | 0.58        |
| 02 07 | -0.35        | 0.23 | 0.20           | 0.29   | 0.14        |
| 02 08 | -1.27        | 0.36 | 0.06           | 0.43   | <b>0.02</b> |
| 02 09 | .            | .    | .              | .      | .           |
| 02 14 | -0.02        | 0.41 | -0.45          | 0.32   | 0.40        |
| 02 15 | -0.05        | 0.28 | -1.38          | 0.48   | <b>0.02</b> |
| 02 16 | -1.01        | 0.35 | -1.00          | 0.70   | 0.99        |
| 01 02 | 0.21         | 0.17 | 0.57           | 0.33   | 0.33        |
| 01 05 | -0.25        | 0.34 | 0.26           | 0.26   | 0.24        |
| 01 06 | 0.48         | 0.35 | 0.28           | 0.35   | 0.68        |
| 01 07 | 0.43         | 0.32 | -0.04          | 0.25   | 0.25        |
| 01 16 | -0.73        | 0.50 | -0.72          | 0.39   | 0.98        |
| 03 04 | 0.27         | 0.33 | 0.39           | 0.53   | 0.85        |
| 03 05 | -0.03        | 0.33 | 0.04           | 0.39   | 0.89        |
| 03 06 | 0.35         | 0.33 | 0.25           | 0.40   | 0.84        |
| 04 05 | -0.30        | 0.33 | -0.30          | 0.34   | 0.99        |
| 04 13 | -0.13        | 0.19 | -0.09          | 0.43   | 0.92        |
| 05 06 | 0.17         | 0.33 | 0.43           | 0.31   | 0.58        |
| 05 10 | 0.09         | 0.33 | -0.19          | 0.37   | 0.57        |
| 05 12 | 0.25         | 0.30 | 0.35           | 280.63 | 1.00        |

|       |       |      |       |        |             |
|-------|-------|------|-------|--------|-------------|
| 05 14 | -0.13 | 0.23 | 0.13  | 0.45   | 0.60        |
| 07 13 | 0.00  | 0.34 | 0.25  | 0.39   | 0.63        |
| 08 15 | -0.11 | 0.33 | 1.22  | 0.45   | <b>0.02</b> |
| 10 13 | 0.27  | 0.23 | -0.01 | 0.43   | 0.57        |
| 11 12 | 0.20  | 0.32 | 0.10  | 636.37 | 1.00        |
| 14 16 | -0.71 | 0.42 | -0.74 | 0.56   | 0.97        |

01: cognitive behavioural therapy delivered with physiotherapy care, 02: physiotherapy care, 03: mindfulness, 04: usual care, 05: cognitive behavioural therapy, 06: advice, 07: combined psychological approaches delivered with physiotherapy care, 08: pain education, 09: mindfulness delivered with physiotherapy care, 10: general practitioner care, 11: counselling, 12: no intervention, 13: combined psychological approaches, 14: behavioural therapy, 15: pain education delivered with physiotherapy care, 16: behavioural therapy delivered with physiotherapy care. Direct Coef.: direct coefficient, SE: standard error, Indirect Coef.: indirect coefficient. Estimates in bold denote significance at  $p < 0.05$ .

**Supplementary Table 17.8** Pain intensity at long-term treatment sustainability

| Side  | Direct Coef. | SE   | Indirect Coef. | SE     | <i>p</i> |
|-------|--------------|------|----------------|--------|----------|
| 02 03 | -0.03        | 1.43 | -3.78          | 2.86   | 0.24     |
| 02 07 | -1.21        | 0.73 | -0.45          | 4.35   | 0.86     |
| 02 08 | -0.77        | 1.17 | -1.56          | 3.28   | 0.82     |
| 02 10 | -0.40        | 1.63 | -1.17          | 4.10   | 0.86     |
| 01 02 | .            | .    | .              | .      | .        |
| 03 04 | 0.07         | 1.47 | 0.13           | 175.52 | 1.00     |
| 03 07 | 0.35         | 1.43 | -3.40          | 2.86   | 0.24     |
| 04 09 | 0.92         | 1.47 | 0.77           | 210.87 | 1.00     |
| 05 06 | 0.18         | 1.46 | 0.60           | 632.28 | 1.00     |
| 06 09 | -0.09        | 1.47 | 0.17           | 282.83 | 1.00     |
| 07 08 | 0.05         | 1.64 | 0.64           | 1.72   | 0.81     |
| 08 10 | 0.25         | 1.63 | 1.02           | 4.10   | 0.86     |

01: combined psychological approaches delivered with physiotherapy care, 02: physiotherapy care, 03: cognitive behavioural therapy, 04: general practitioner care, 05: pain education, 06: usual care, 07: cognitive behavioural therapy delivered with physiotherapy care, 08: behavioural therapy delivered with physiotherapy care, 09: combined psychological approaches, 10: behavioural therapy. Direct Coef.: direct coefficient, SE: standard error, Indirect Coef.: indirect coefficient. Estimates in bold denote significance at  $p < 0.05$ .

**Supplementary Q. Results from direct and network evidence for fear avoidance and intervention compliance**

**Supplementary Figure 15.** Network plots of fear avoidance at post-intervention, and short, mid, and long-term follow-up

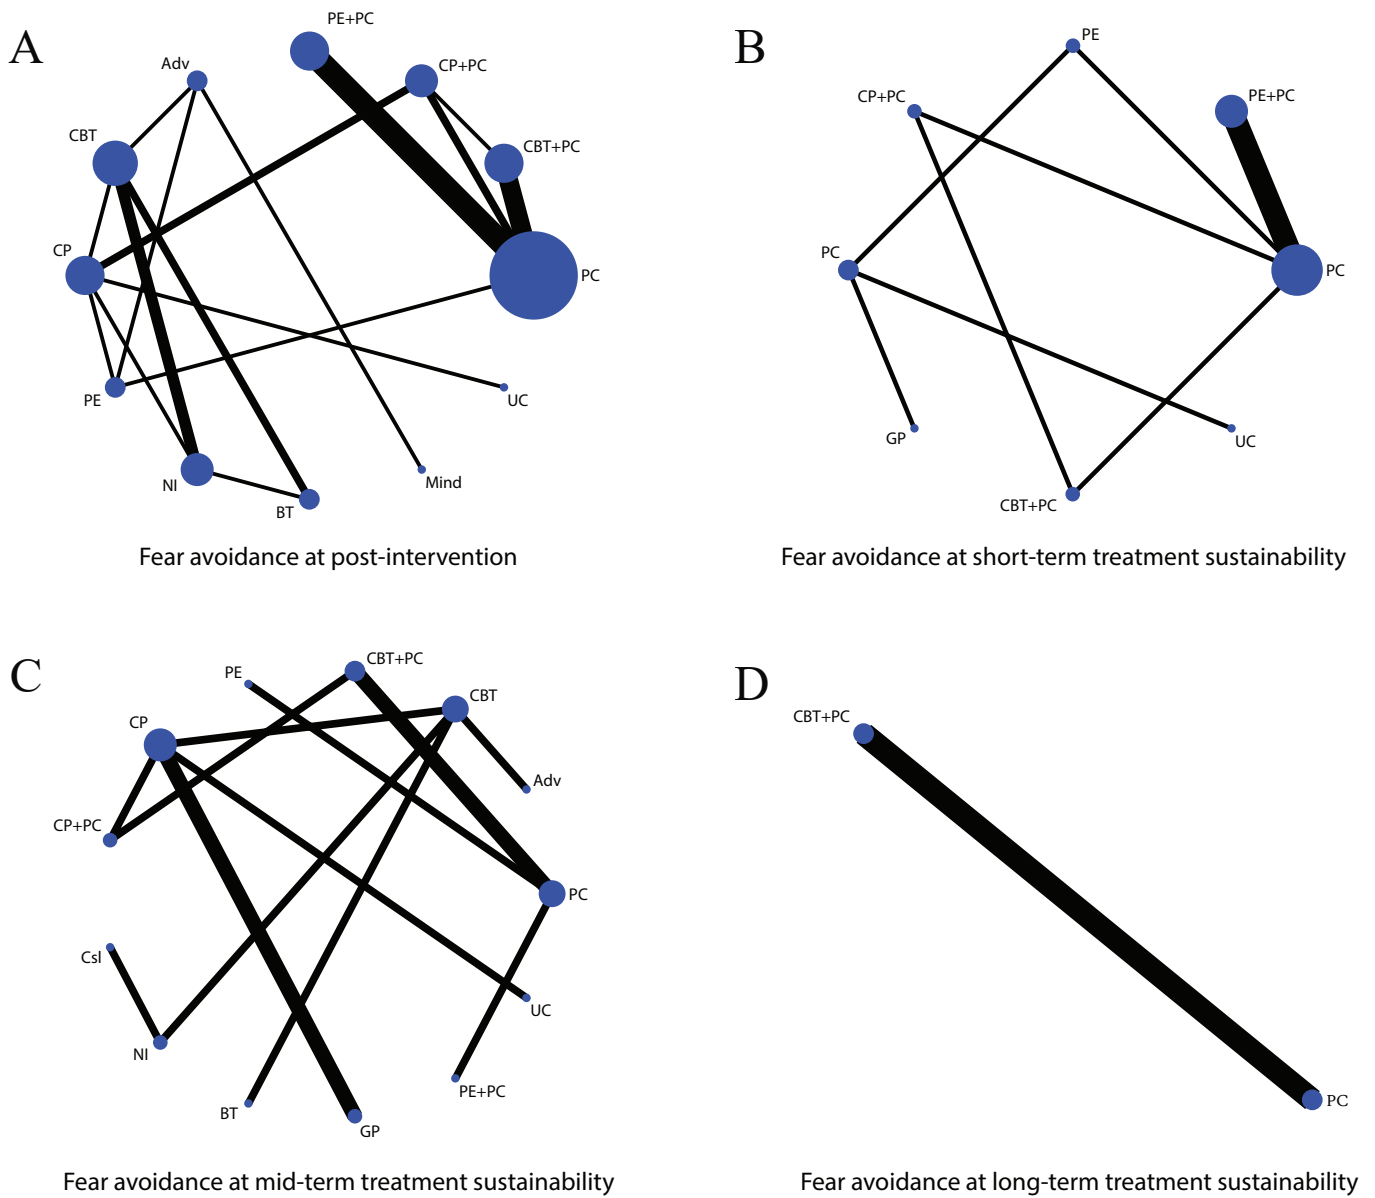

Adv: advice, BT: behavioural therapy, CBT: cognitive behavioural therapy, CBT+PC: cognitive behavioural therapy delivered with physiotherapy care, CP: combined psychological approaches, CP+PC: combined psychological approaches delivered with physiotherapy care, Csl: counselling, GP: general practitioner care, Mind: Mindfulness, NI: no intervention, PC: physiotherapy care, PE: pain education, PE+PC: pain education delivered with physiotherapy care, UC: usual care.

**Supplementary Table 18.1** Fear avoidance at post-intervention

|                            |                            |                        |                        |                        |                        |                        |                        |                        |                        |                       |                        |
|----------------------------|----------------------------|------------------------|------------------------|------------------------|------------------------|------------------------|------------------------|------------------------|------------------------|-----------------------|------------------------|
| PC<br>(reference)          | <b>1.93</b><br>(0.71,3.14) |                        |                        |                        |                        |                        | -0.14 (-<br>2.81,2.53) | 1.31 (-<br>1.43,4.04)  |                        |                       |                        |
| <b>1.77</b><br>(0.65,2.90) | CBT+PC                     |                        |                        |                        |                        |                        | -0.33 (-<br>2.98,2.33) |                        |                        |                       |                        |
| 0.83 (-<br>0.24,1.91)      | -0.94 (-<br>2.49,0.62)     | PE+PC                  |                        |                        |                        |                        |                        |                        |                        |                       |                        |
| 0.27 (-<br>2.57,3.11)      | -1.50 (-<br>4.46,1.46)     | -0.56 (-<br>3.60,2.47) | Advice                 | 0.13 (-<br>2.55,2.82)  |                        |                        |                        | 1.25 (-<br>1.48,3.99)  |                        | 0.18 (-<br>2.41,2.78) |                        |
| 0.71 (-<br>2.07,3.49)      | -1.06 (-<br>3.94,1.82)     | -0.12 (-<br>3.10,2.85) | 0.44 (-<br>1.76,2.65)  | CBT                    | -0.06 (-<br>2.77,2.64) |                        |                        | -0.84 (-<br>2.41,0.72) | -0.51 (-<br>2.43,1.42) |                       |                        |
| 0.92 (-<br>1.20,3.04)      | -0.85 (-<br>3.08,1.37)     | 0.08 (-<br>2.29,2.46)  | 0.65 (-<br>1.80,3.10)  | 0.21 (-<br>1.87,2.29)  | CP                     | -0.15 (-<br>2.08,1.78) | -0.13 (-<br>2.83,2.56) | -0.79 (-<br>3.51,1.93) |                        |                       | -0.37 (-<br>2.96,2.23) |
| 0.71 (-<br>1.02,2.45)      | -1.06 (-<br>2.86,0.74)     | -0.12 (-<br>2.16,1.92) | 0.44 (-<br>2.33,3.21)  | 0.00 (-<br>2.57,2.58)  | -0.21 (-<br>1.89,1.48) |                        | CP+PC                  |                        |                        |                       |                        |
| 1.20 (-<br>0.90,3.31)      | -0.57 (-<br>2.85,1.72)     | 0.37 (-<br>1.99,2.73)  | 0.93 (-<br>1.30,3.16)  | 0.49 (-<br>1.93,2.92)  | 0.28 (-<br>1.65,2.21)  | 0.49 (-<br>1.69,2.67)  | PE                     |                        |                        |                       |                        |
| -0.07 (-<br>2.97,2.84)     | -1.84 (-<br>4.83,1.15)     | -0.90 (-<br>3.99,2.19) | -0.34 (-<br>2.86,2.19) | -0.78 (-<br>2.24,0.68) | -0.98 (-<br>3.18,1.21) | -0.78 (-<br>3.46,1.91) | -1.27 (-<br>3.87,1.34) | No<br>intervention     | 0.53 (-<br>2.22,3.27)  |                       |                        |
| 0.30 (-<br>2.93,3.54)      | -1.47 (-<br>4.79,1.85)     | -0.53 (-<br>3.94,2.87) | 0.03 (-<br>2.77,2.83)  | -0.41 (-<br>2.18,1.36) | -0.62 (-<br>3.26,2.03) | -0.41 (-<br>3.47,2.64) | -0.90 (-<br>3.85,2.04) | 0.37 (-<br>1.65,2.39)  | BT                     |                       |                        |
| 0.45 (-<br>3.40,4.30)      | -1.32 (-<br>5.25,2.62)     | -0.38 (-<br>4.38,3.61) | 0.18 (-<br>2.41,2.78)  | -0.26 (-<br>3.66,3.14) | -0.47 (-<br>4.04,3.10) | -0.26 (-<br>4.06,3.53) | -0.75 (-<br>4.17,2.67) | 0.52 (-<br>3.10,4.14)  | 0.15 (-<br>3.67,3.96)  | Mindfulness           |                        |
| 0.55 (-<br>2.80,3.90)      | -1.22 (-<br>4.64,2.20)     | -0.28 (-<br>3.80,3.24) | 0.28 (-<br>3.29,3.85)  | -0.16 (-<br>3.49,3.17) | -0.37 (-<br>2.96,2.23) | -0.16 (-<br>3.26,2.93) | -0.65 (-<br>3.89,2.58) | 0.62 (-<br>2.78,4.02)  | 0.25 (-<br>3.46,3.96)  | 0.10 (-<br>4.31,4.51) | Usual care             |

Results are presented as standardised mean differences (SMD) and 95% confidence intervals. BT: behavioural therapy, CBT: cognitive behavioural therapy, CBT+PC: cognitive behavioural therapy delivered with physiotherapy care, CP: combined psychological approaches, CP+PC: combined psychological approaches delivered with physiotherapy care, PC: physiotherapy care, PE: pain education, PE+PC: pain education delivered with physiotherapy care. Estimates in bold denote significance at  $p < 0.05$ . SMD values less than 0.00 favour the column-defining treatment node for the NMA results (lower left triangle) and the row-defining treatment nodes for the pairwise meta-analysis results (upper right triangle). Note: Three studies [5, 17, 92] were excluded from the NMA due to using ambiguous methods to score the Fear Avoidance Beliefs Questionnaire which were inconsistent with validated recommendations. The results of these studies have been summarised descriptively in Supplementary E.[17, 92]

**Supplementary Figure 16.** Forest plots of network results for fear avoidance at post-intervention

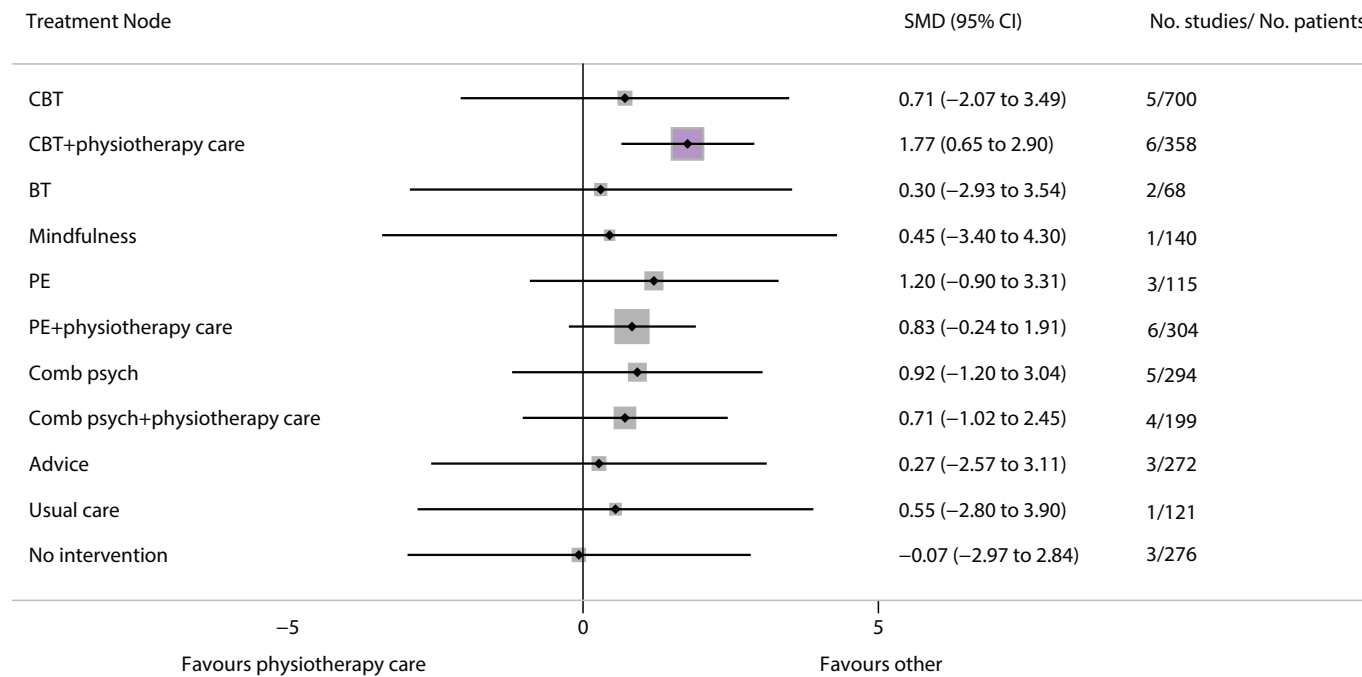

BT: behavioural therapy, CBT: cognitive behavioural therapy, Comb psych: combined psychological approaches, GP care: general practitioner care, PE: pain education. Physiotherapy care was considered the reference comparison group.

**Supplementary Table 18.2** Fear avoidance at short-term treatment sustainability

|                                   |                                       |                                       |                                   |                                       |                        |                        |                        |
|-----------------------------------|---------------------------------------|---------------------------------------|-----------------------------------|---------------------------------------|------------------------|------------------------|------------------------|
| PC<br>(reference)                 |                                       | <b>1.34</b><br><b>(0.38,2.30)</b>     | 0.14 (-<br>0.85,1.13)             |                                       |                        | -0.20 (-<br>1.15,0.74) |                        |
| <b>0.92</b><br><b>(0.50,1.34)</b> | PE+PC                                 |                                       |                                   |                                       |                        |                        |                        |
| <b>1.34</b><br><b>(0.38,2.30)</b> | 0.42 (-<br>0.62,1.47)                 | PE                                    |                                   | 0.36 (-<br>0.55,1.27)                 |                        |                        |                        |
| -0.09 (-<br>0.85,0.66)            | <b>-1.01</b> (-<br><b>1.87,-0.15)</b> | <b>-1.43</b> (-<br><b>2.65,-0.21)</b> | CP+PC                             |                                       |                        | 0.30 (-<br>0.61,1.20)  |                        |
| <b>1.70</b><br><b>(0.38,3.02)</b> | 0.78 (-<br>0.60,2.17)                 | 0.36 (-<br>0.55,1.27)                 | <b>1.79</b><br><b>(0.28,3.31)</b> | CP                                    | -0.53 (-<br>1.39,0.33) |                        | -0.42 (-<br>1.27,0.44) |
| 1.17 (-<br>0.40,2.74)             | 0.25 (-<br>1.37,1.88)                 | -0.17 (-<br>1.42,1.08)                | 1.26 (-<br>0.48,3.01)             | -0.53 (-<br>1.39,0.33)                | GP care                |                        |                        |
| 0.01 (-<br>0.73,0.74)             | <b>-0.91</b> (-<br><b>1.76,-0.06)</b> | <b>-1.33</b> (-<br><b>2.54,-0.12)</b> | 0.10 (-<br>0.62,0.82)             | <b>-1.69</b> (-<br><b>3.20,-0.18)</b> | -1.16 (-<br>2.90,0.57) | CBT+PC                 |                        |
| 1.28 (-<br>0.29,2.85)             | 0.37 (-<br>1.26,1.99)                 | -0.06 (-<br>1.30,1.19)                | 1.38 (-<br>0.37,3.12)             | -0.42 (-<br>1.27,0.44)                | 0.11 (-<br>1.10,1.32)  | 1.27 (-<br>0.46,3.01)  | Usual care             |

Results are presented as standardised mean differences (SMD) and 95% confidence intervals. CBT+PC: cognitive behavioural therapy delivered with physiotherapy care, CP: combined psychological approaches, CP+PC: combined psychological approaches delivered with physiotherapy care, GP care: general practitioner care, PC: physiotherapy care, PE: pain education, PE+PC: pain education delivered with physiotherapy care. Estimates in bold denote significance at  $p < 0.05$ . SMD values less than 0.00 favour the column-defining treatment node for the NMA results (lower left triangle) and the row-defining treatment nodes for the pairwise meta-analysis results (upper right triangle).

**Supplementary Figure 17.** Forest plots of network results for fear avoidance at short-term treatment sustainability

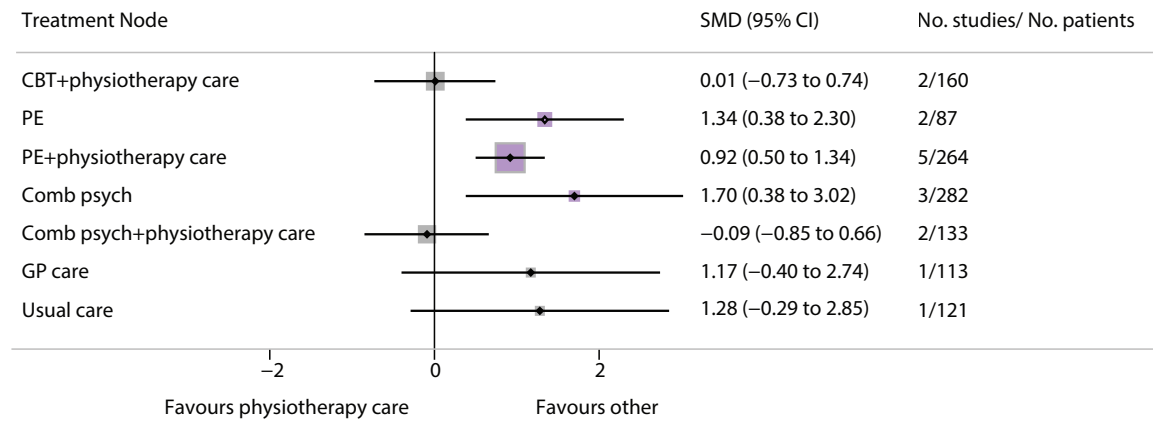

CBT: cognitive behavioural therapy, Comb psych: combined psychological approaches, GP care: general practitioner care, PE: pain education. Physiotherapy care was considered the reference comparison group.



**Supplementary Table 18.3** Fear avoidance at mid-term treatment sustainability

|                        |                        |                        |                        |                        |                        |                        |                        |                        |                        |                        |                        |                        |
|------------------------|------------------------|------------------------|------------------------|------------------------|------------------------|------------------------|------------------------|------------------------|------------------------|------------------------|------------------------|------------------------|
| PC<br>(reference)      |                        |                        | 0.5 (-<br>0.08,1.07)   |                        |                        |                        |                        |                        |                        |                        |                        |                        |
| 0.25 (-<br>1.43,1.92)  | Advice                 | 0.00 (-<br>0.78,0.78)  |                        |                        |                        |                        |                        |                        |                        |                        |                        |                        |
| 0.25 (-<br>1.24,1.73)  | 0.00 (-<br>0.78,0.78)  | CBT                    |                        |                        | -0.27 (-<br>1.08,0.54) |                        |                        | -0.51 (-<br>1.26,0.23) | -0.07 (-<br>0.91,0.77) |                        |                        |                        |
| 0.50 (-<br>0.08,1.07)  | 0.25 (-<br>1.33,1.83)  | 0.25 (-<br>1.12,1.62)  | CBT+PC                 |                        |                        | -0.32 (-<br>1.10,0.45) |                        |                        |                        |                        |                        |                        |
| 0.76 (-<br>0.11,1.62)  | 0.51 (-<br>1.38,2.40)  | 0.51 (-<br>1.21,2.23)  | 0.26 (-<br>0.78,1.30)  | PE                     |                        |                        |                        |                        |                        |                        |                        |                        |
| -0.02 (-<br>1.27,1.22) | -0.27 (-<br>1.39,0.85) | -0.27 (-<br>1.08,0.54) | -0.52 (-<br>1.62,0.58) | -0.78 (-<br>2.30,0.73) | CP                     | 0.20 (-<br>0.59,0.98)  |                        |                        |                        | -0.14 (-<br>0.69,0.40) |                        | -0.32 (-<br>1.09,0.45) |
| 0.17 (-<br>0.79,1.14)  | -0.07 (-<br>1.44,1.30) | -0.07 (-<br>1.20,1.06) | -0.32 (-<br>1.10,0.45) | -0.58 (-<br>1.88,0.71) | 0.20 (-<br>0.59,0.98)  | CP+PC                  |                        |                        |                        |                        |                        |                        |
| -0.13 (-<br>1.96,1.70) | -0.38 (-<br>1.70,0.94) | -0.38 (-<br>1.45,0.69) | -0.63 (-<br>2.37,1.11) | -0.89 (-<br>2.92,1.14) | -0.11 (-<br>1.45,1.23) | -0.31 (-<br>1.86,1.25) | Csl                    | -0.13 (-<br>0.90,0.64) |                        |                        |                        |                        |
| -0.27 (-<br>1.93,1.40) | -0.51 (-<br>1.59,0.56) | -0.51 (-<br>1.26,0.23) | -0.76 (-<br>2.32,0.80) | -1.02 (-<br>2.90,0.85) | -0.24 (-<br>1.34,0.86) | -0.44 (-<br>1.79,0.91) | -0.13 (-<br>0.90,0.64) | No<br>Intervention     |                        |                        |                        |                        |
| 0.18 (-<br>1.53,1.89)  | -0.07 (-<br>1.21,1.08) | -0.07 (-<br>0.91,0.77) | -0.32 (-<br>1.92,1.29) | -0.58 (-<br>2.49,1.34) | 0.20 (-<br>0.97,1.37)  | 0.01 (-<br>1.40,1.41)  | 0.31 (-<br>1.05,1.67)  | 0.45 (-<br>0.68,1.57)  | BT                     |                        |                        |                        |
| -0.17 (-<br>1.53,1.19) | -0.41 (-<br>1.66,0.84) | -0.41 (-<br>1.39,0.56) | -0.66 (-<br>1.90,0.57) | -0.93 (-<br>2.54,0.68) | -0.14 (-<br>0.69,0.40) | -0.34 (-<br>1.30,0.61) | -0.04 (-<br>1.49,1.41) | 0.10 (-<br>1.13,1.33)  | -0.35 (-<br>1.64,0.94) | GP care                |                        |                        |
| 0.41 (-<br>0.36,1.19)  | 0.16 (-<br>1.68,2.01)  | 0.16 (-<br>1.51,1.84)  | -0.09 (-<br>1.05,0.88) | -0.35 (-<br>1.51,0.81) | 0.43 (-<br>1.03,1.90)  | 0.24 (-<br>1.00,1.48)  | 0.54 (-<br>1.45,2.53)  | 0.68 (-<br>1.16,2.51)  | 0.23 (-<br>1.65,2.11)  | 0.58 (-<br>0.99,2.14)  | PE+PC                  |                        |
| -0.34 (-<br>1.80,1.12) | -0.59 (-<br>1.95,0.78) | -0.59 (-<br>1.70,0.53) | -0.84 (-<br>2.18,0.51) | -1.10 (-<br>2.80,0.60) | -0.32 (-<br>1.09,0.45) | -0.51 (-<br>1.61,0.58) | -0.21 (-<br>1.76,1.34) | -0.07 (-<br>1.42,1.27) | -0.52 (-<br>1.92,0.88) | -0.17 (-<br>1.11,0.77) | -0.75 (-<br>2.41,0.91) | Usual care             |

Results are presented as standardised mean differences (SMD) and 95% confidence intervals. BT: behavioural therapy, CBT: cognitive behavioural therapy, CBT+PC: cognitive behavioural therapy delivered with physiotherapy care, CP: combined psychological approaches, CP+PC: combined psychological approaches delivered with physiotherapy care, Csl: counselling, GP care: general practitioner care, PC: physiotherapy care, PE: pain education, PE+PC: pain education delivered with physiotherapy care. Estimates in bold denote significance at  $p < 0.05$ . SMD values less than 0.00 favour the column-defining treatment node for the NMA results (lower left triangle) and the row-defining treatment nodes for the pairwise meta-analysis results (upper right triangle).

**Supplementary Figure 18.** Forest plots of network results for fear avoidance at mid-term treatment sustainability

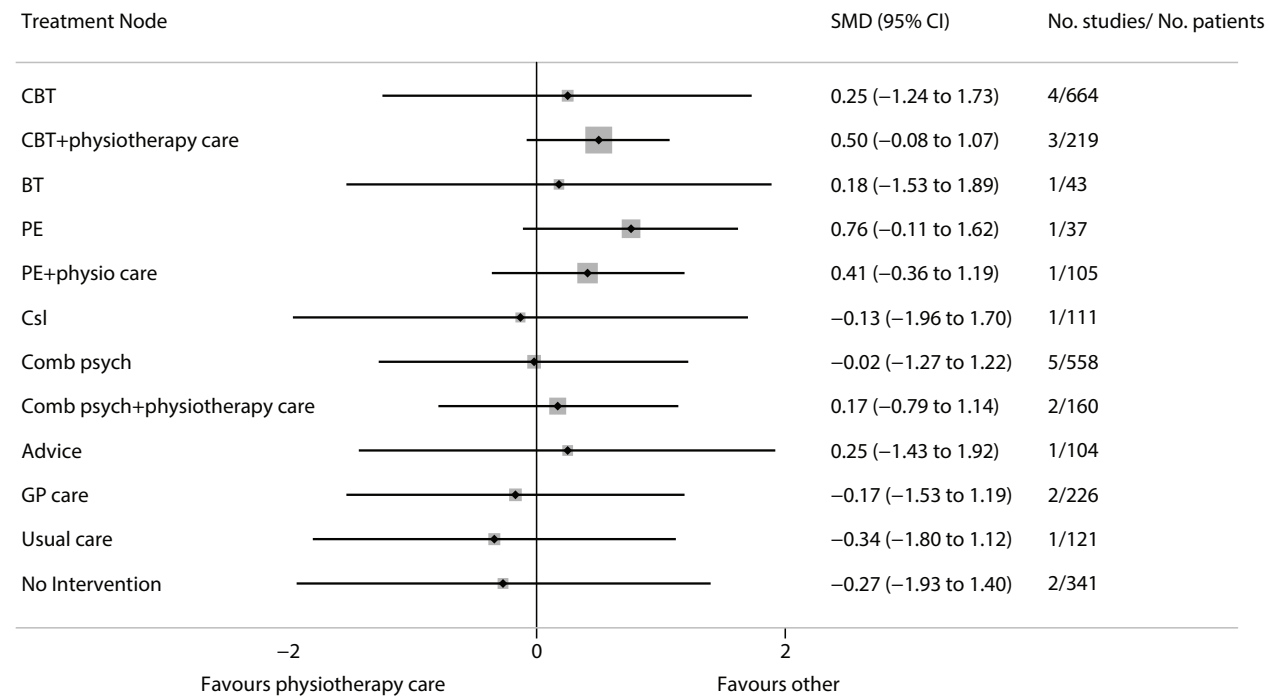

BT: behavioural therapy, CBT: cognitive behavioural therapy, Comb psych: combined psychological approaches, GP care: general practitioner care, PE: pain education. Physiotherapy care was considered the reference comparison group.

**Comment.** Fear avoidance at long-term treatment sustainability

NMA was not performed at long-term treatment sustainability for fear avoidance as the network became disconnected. Results from pairwise meta-analysis for cognitive behavioural therapy delivered with physiotherapy care (CBT+PC) compared with physiotherapy care (PC): standardised mean difference 3.21 (95% confidence interval 0.00 to 6.41).

**Supplementary Figure 19.** Network plot for intervention compliance at post-intervention

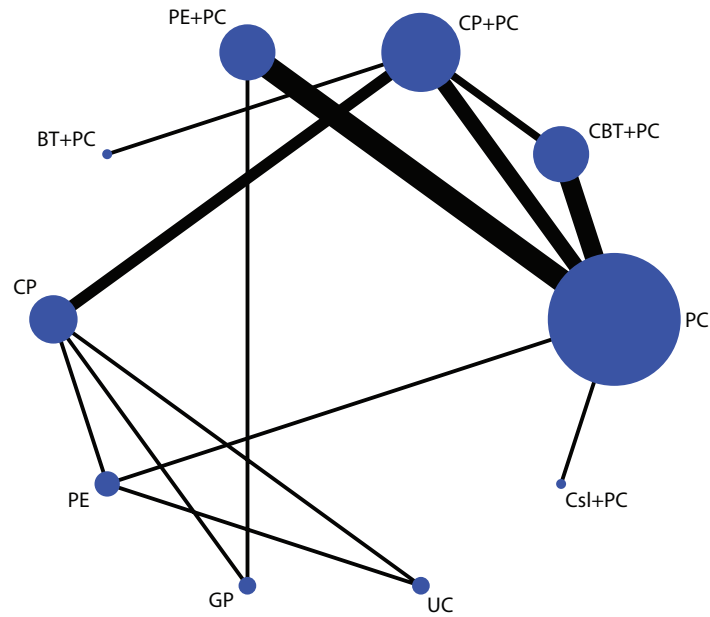

BT+PC: behavioural therapy delivered with physiotherapy care, CBT+PC: cognitive behavioural therapy delivered with physiotherapy care, CP: combined psychological approaches, CP+PC: combined psychological approaches delivered with physiotherapy care, Csl+PC: counselling delivered with physiotherapy care, GP: general practitioner care, PC: physiotherapy care, PE: pain education, PE+PC: pain education delivered with physiotherapy care, UC: usual care.

**Supplementary Table 18.4** Intervention compliance at post-intervention

|                                   |                      |                      |                      |                       |                      |                      |                      |                      |               |
|-----------------------------------|----------------------|----------------------|----------------------|-----------------------|----------------------|----------------------|----------------------|----------------------|---------------|
| PC<br>(reference)                 | 0.77<br>(0.36,1.63)  | 0.40<br>(0.15,1.06)  | 0.43<br>(0.14,1.32)  |                       |                      | 0.97<br>(0.02,58.54) |                      |                      |               |
| 0.73<br>(0.38,1.39)               | <b>CBT+PC</b>        | 0.82<br>(0.31,2.15)  |                      |                       |                      |                      |                      |                      |               |
| 0.50<br>(0.23,1.07)               | 0.68<br>(0.31,1.49)  | <b>CP+PC</b>         |                      | 1.00<br>(0.02,60.40)  | 0.61<br>(0.22,1.67)  |                      |                      |                      |               |
| 0.47<br>(0.17,1.30)               | 0.65<br>(0.20,2.13)  | 0.95<br>(0.28,3.21)  | <b>PE+PC</b>         |                       |                      |                      | 0.58<br>(0.09,3.83)  |                      |               |
| 0.50<br>(0.01,32.13)              | 0.68<br>(0.01,44.29) | 1.00<br>(0.02,60.40) | 1.06<br>(0.01,76.15) | <b>BT+PC</b>          |                      |                      |                      |                      |               |
| <b>0.28</b><br><b>(0.09,0.86)</b> | 0.39<br>(0.12,1.24)  | 0.57<br>(0.23,1.44)  | 0.61<br>(0.16,2.36)  | 0.57<br>(0.01,38.41)  | <b>CP</b>            | 3.06<br>(0.10,89.97) | 1.57<br>(0.33,7.41)  | 1.40<br>(0.28,6.95)  |               |
| 0.60<br>(0.09,3.79)               | 0.82<br>(0.13,5.37)  | 1.21<br>(0.21,7.03)  | 1.27<br>(0.16,9.83)  | 1.21<br>(0.01,104.68) | 2.10<br>(0.43,10.32) | <b>PE</b>            |                      | 0.41<br>(0.13,1.27)  |               |
| 0.37<br>(0.09,1.55)               | 0.50<br>(0.11,2.28)  | 0.74<br>(0.18,3.05)  | 0.78<br>(0.19,3.26)  | 0.74<br>(0.01,56.68)  | 1.29<br>(0.36,4.65)  | 0.61<br>(0.08,4.63)  | <b>GP care</b>       |                      |               |
| 0.29<br>(0.05,1.59)               | 0.40<br>(0.07,2.27)  | 0.58<br>(0.12,2.93)  | 0.61<br>(0.09,4.11)  | 0.58<br>(0.01,47.71)  | 1.01<br>(0.25,4.07)  | 0.48<br>(0.17,1.39)  | 0.79<br>(0.12,5.12)  | <b>Usual care</b>    |               |
| 1.15<br>(0.29,4.55)               | 1.59<br>(0.35,7.24)  | 2.33<br>(0.48,11.22) | 2.46<br>(0.44,13.61) | 2.33<br>(0.03,188.17) | 4.05<br>(0.69,23.63) | 1.93<br>(0.19,19.33) | 3.15<br>(0.43,23.02) | 4.01<br>(0.45,35.99) | <b>Csl+PC</b> |

Results are presented as odds ratios (OR) and 95% confidence intervals. BT+PC: behavioural therapy delivered with physiotherapy care, CBT+PC: cognitive behavioural therapy delivered with physiotherapy care, CP: combined psychological approaches, CP+PC: combined psychological approaches delivered with physiotherapy care, Csl+PC: counselling delivered with physiotherapy care, GP care: general practitioner care, PE: pain education, PE+PC: pain education delivered with physiotherapy care, PC: physiotherapy care. Estimates in bold denote significance at  $p < 0.05$ . OR values less than 1.00 favour the column-defining treatment node for the NMA results (lower left triangle) and the row-defining treatment nodes for the pairwise meta-analysis results (upper right triangle).

**Supplementary Figure 20.** Forest plots of network results for intervention compliance at post-intervention

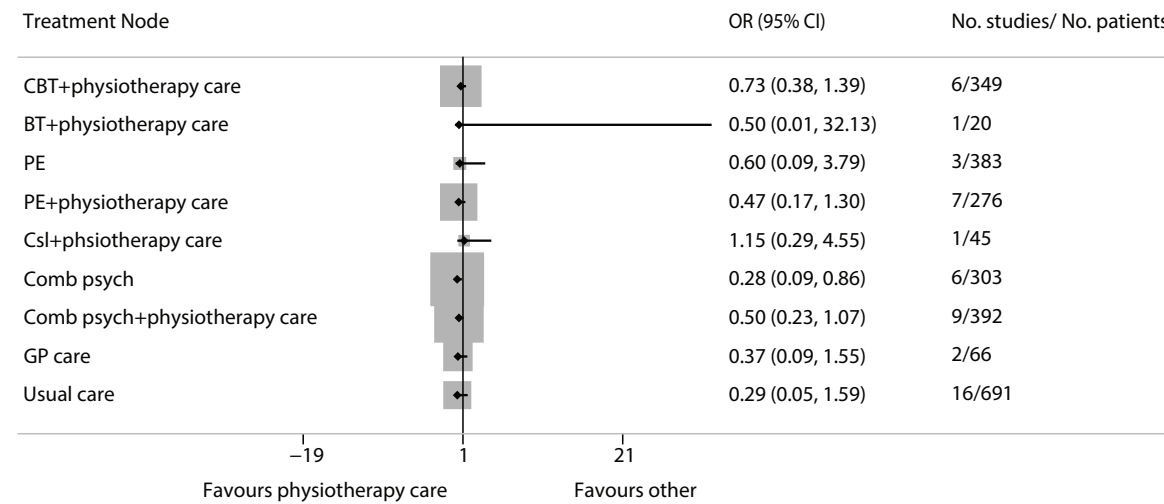

BT: behavioural therapy, CBT: cognitive behavioural therapy, Comb psych: combined psychological approaches, Csl: counselling, GP care: general practitioner care, PE: pain education. Physiotherapy care was considered the reference comparison group.

## Supplementary R. CINeMA results for fear avoidance

Judgments of the confidence in cumulative evidence were evaluated using the Confidence in Network Meta-Analysis (CINeMA) framework,[102-104] a web application of the Grading of Recommendations Assessment, Development and Evaluation (GRADE) ratings approach.

In CINeMA, the default confidence rating for each comparison is “high confidence.” Confidence ratings per comparison were assessed according to the following steps. First, we assigned a point scale to the domain-level judgments: “no concerns” was 0 points, “some concerns” was 0.5 points, “major concerns” was 1 point. Then, we downgraded the confidence rating, for each comparison, by: (i) one level (i.e., “moderate confidence”), if there was a reduction of  $\geq 1$  but  $< 2$  points across all domains; two levels (i.e., “low confidence”), if there was a reduction of  $\geq 2$  but  $< 3$  points across all domains; (ii) three levels (i.e., “very low confidence”), if there was a reduction of  $\geq 3$  points across all domains.

**Supplementary Table 19.1** Fear avoidance at post-intervention

| Comparison   | n studies | Within-study bias | Reporting bias | Indirectness | Imprecision    | Heterogeneity  | Incoherence | Confidence rating |
|--------------|-----------|-------------------|----------------|--------------|----------------|----------------|-------------|-------------------|
| Adv:CBT      | 1         | Some concerns     | Undetected     | No concerns  | Major concerns | No concerns    | No concerns | Moderate          |
| Adv:Mind     | 1         | Some concerns     | Undetected     | No concerns  | Major concerns | No concerns    | No concerns | Moderate          |
| Adv:PE       | 1         | Some concerns     | Undetected     | No concerns  | Major concerns | No concerns    | No concerns | Moderate          |
| BT:CBT       | 2         | Major concerns    | Undetected     | No concerns  | Major concerns | No concerns    | No concerns | Moderate          |
| BT:NI        | 1         | Major concerns    | Undetected     | No concerns  | Major concerns | No concerns    | No concerns | Moderate          |
| CBT:CP       | 1         | Some concerns     | Undetected     | No concerns  | Major concerns | No concerns    | No concerns | Moderate          |
| CBT:NI       | 3         | Some concerns     | Undetected     | No concerns  | Some concerns  | Some concerns  | No concerns | Moderate          |
| CBT+PC:CP+PC | 1         | Some concerns     | Undetected     | No concerns  | Major concerns | No concerns    | No concerns | Moderate          |
| CBT+PC:PC    | 5         | Some concerns     | Undetected     | No concerns  | No concerns    | Some concerns  | No concerns | Moderate          |
| CP:CP+PC     | 2         | Some concerns     | Undetected     | No concerns  | Major concerns | No concerns    | No concerns | Moderate          |
| CP:NI        | 1         | Some concerns     | Undetected     | No concerns  | Some concerns  | Some concerns  | No concerns | Moderate          |
| CP:PE        | 1         | Some concerns     | Undetected     | No concerns  | Major concerns | No concerns    | No concerns | Moderate          |
| CP:UC        | 1         | Some concerns     | Undetected     | No concerns  | Major concerns | No concerns    | No concerns | Moderate          |
| CP+PC:PC     | 1         | Some concerns     | Undetected     | No concerns  | No concerns    | Major concerns | No concerns | Moderate          |
| PC:PE        | 1         | Some concerns     | Undetected     | No concerns  | No concerns    | Major concerns | No concerns | Moderate          |
| PC:PE+PC     | 6         | Some concerns     | Undetected     | No concerns  | No concerns    | Major concerns | No concerns | Moderate          |
| Adv:BT       | 0         | Some concerns     | Undetected     | No concerns  | Major concerns | No concerns    | No concerns | Moderate          |
| Adv:CBT+PC   | 0         | Some concerns     | Undetected     | No concerns  | Major concerns | No concerns    | No concerns | Moderate          |
| Adv:CP       | 0         | Some concerns     | Undetected     | No concerns  | Major concerns | No concerns    | No concerns | Moderate          |





|             |   |               |            |             |                |             |             |          |
|-------------|---|---------------|------------|-------------|----------------|-------------|-------------|----------|
| CP+PC:PE    | 0 | Some concerns | Undetected | No concerns | Major concerns | No concerns | No concerns | Moderate |
| CP+PC:PE+PC | 0 | Some concerns | Undetected | No concerns | Major concerns | No concerns | No concerns | Moderate |
| CP+PC:UC    | 0 | Some concerns | Undetected | No concerns | Major concerns | No concerns | No concerns | Moderate |
| Mind:NI     | 0 | Some concerns | Undetected | No concerns | Major concerns | No concerns | No concerns | Moderate |
| Mind:PC     | 0 | Some concerns | Undetected | No concerns | Major concerns | No concerns | No concerns | Moderate |
| Mind:PE     | 0 | Some concerns | Undetected | No concerns | Major concerns | No concerns | No concerns | Moderate |
| Mind:PE+PC  | 0 | Some concerns | Undetected | No concerns | Major concerns | No concerns | No concerns | Moderate |
| Mind:UC     | 0 | Some concerns | Undetected | No concerns | Major concerns | No concerns | No concerns | Moderate |
| NI:PC       | 0 | Some concerns | Undetected | No concerns | Major concerns | No concerns | No concerns | Moderate |
| NI:PE       | 0 | Some concerns | Undetected | No concerns | Major concerns | No concerns | No concerns | Moderate |
| NI:PE+PC    | 0 | Some concerns | Undetected | No concerns | Major concerns | No concerns | No concerns | Moderate |
| NI:UC       | 0 | Some concerns | Undetected | No concerns | Major concerns | No concerns | No concerns | Moderate |
| PC:UC       | 0 | Some concerns | Undetected | No concerns | Major concerns | No concerns | No concerns | Moderate |
| PE:PE+PC    | 0 | Some concerns | Undetected | No concerns | Major concerns | No concerns | No concerns | Moderate |
| PE:UC       | 0 | Some concerns | Undetected | No concerns | Major concerns | No concerns | No concerns | Moderate |
| PE+PC:UC    | 0 | Some concerns | Undetected | No concerns | Major concerns | No concerns | No concerns | Moderate |

Adv: advice, BT: behavioural therapy, CBT: cognitive behavioural therapy, CBT+PC: cognitive behavioural therapy delivered with physiotherapy care, CP: combined psychological approaches, CP+PC: combined psychological approaches delivered with physiotherapy care, Mind: mindfulness, NI: no intervention, PC: physiotherapy care, PE: pain education, PE+PC: pain education delivered with physiotherapy care, UC: usual care.

**Supplementary Table 19.2** Fear avoidance at short-term treatment sustainability

| Comparison   | n studies | Within-study bias | Reporting bias | Indirectness | Imprecision    | Heterogeneity  | Incoherence | Confidence rating |
|--------------|-----------|-------------------|----------------|--------------|----------------|----------------|-------------|-------------------|
| CBT+PC:CP+PC | 1         | Some concerns     | Undetected     | No concerns  | Major concerns | No concerns    | No concerns | Moderate          |
| CBT+PC:PC    | 1         | Some concerns     | Undetected     | No concerns  | Major concerns | No concerns    | No concerns | Moderate          |
| CP:GP        | 1         | Some concerns     | Undetected     | No concerns  | Some concerns  | Some concerns  | No concerns | Moderate          |
| CP:PE        | 1         | Some concerns     | Undetected     | No concerns  | Major concerns | No concerns    | No concerns | Moderate          |
| CP:UC        | 1         | Some concerns     | Undetected     | No concerns  | Some concerns  | Some concerns  | No concerns | Moderate          |
| CP+PC:PC     | 1         | Some concerns     | Undetected     | No concerns  | Major concerns | No concerns    | No concerns | Moderate          |
| PC:PE        | 1         | Some concerns     | Undetected     | No concerns  | No concerns    | Some concerns  | No concerns | Moderate          |
| PC:PE+PC     | 5         | Some concerns     | Undetected     | No concerns  | No concerns    | Some concerns  | No concerns | Moderate          |
| CBT+PC:CP    | 0         | Some concerns     | Undetected     | No concerns  | No concerns    | Major concerns | No concerns | Moderate          |

|              |   |               |            |             |                |                |             |          |
|--------------|---|---------------|------------|-------------|----------------|----------------|-------------|----------|
| CBT+PC:GP    | 0 | Some concerns | Undetected | No concerns | Major concerns | No concerns    | No concerns | Moderate |
| CBT+PC:PE    | 0 | Some concerns | Undetected | No concerns | No concerns    | Major concerns | No concerns | Moderate |
| CBT+PC:PE+PC | 0 | Some concerns | Undetected | No concerns | No concerns    | Major concerns | No concerns | Moderate |
| CBT+PC:UC    | 0 | Some concerns | Undetected | No concerns | Some concerns  | Some concerns  | No concerns | Moderate |
| CP:CP+PC     | 0 | Some concerns | Undetected | No concerns | No concerns    | Major concerns | No concerns | Moderate |
| CP:PC        | 0 | Some concerns | Undetected | No concerns | No concerns    | Some concerns  | No concerns | Moderate |
| CP:PE+PC     | 0 | Some concerns | Undetected | No concerns | Major concerns | No concerns    | No concerns | Moderate |
| CP+PC:GP     | 0 | Some concerns | Undetected | No concerns | Some concerns  | Some concerns  | No concerns | Moderate |
| CP+PC:PE     | 0 | Some concerns | Undetected | No concerns | No concerns    | Major concerns | No concerns | Moderate |
| CP+PC:PE+PC  | 0 | Some concerns | Undetected | No concerns | No concerns    | Major concerns | No concerns | Moderate |
| CP+PC:UC     | 0 | Some concerns | Undetected | No concerns | Some concerns  | Some concerns  | No concerns | Moderate |
| GP:PC        | 0 | Some concerns | Undetected | No concerns | Some concerns  | Some concerns  | No concerns | Moderate |
| GP:PE        | 0 | Some concerns | Undetected | No concerns | Major concerns | No concerns    | No concerns | Moderate |
| GP:PE+PC     | 0 | Some concerns | Undetected | No concerns | Major concerns | No concerns    | No concerns | Moderate |
| GP:UC        | 0 | Some concerns | Undetected | No concerns | Major concerns | No concerns    | No concerns | Moderate |
| PC:UC        | 0 | Some concerns | Undetected | No concerns | Some concerns  | Some concerns  | No concerns | Moderate |
| PE:PE+PC     | 0 | Some concerns | Undetected | No concerns | Major concerns | No concerns    | No concerns | Moderate |
| PE:UC        | 0 | Some concerns | Undetected | No concerns | Major concerns | No concerns    | No concerns | Moderate |
| PE+PC:UC     | 0 | Some concerns | Undetected | No concerns | Major concerns | No concerns    | No concerns | Moderate |

CBT+PC: cognitive behavioural therapy delivered with physiotherapy care, CP: combined psychological approaches, CP+PC: combined psychological approaches delivered with physiotherapy care, GP: general practitioner care, PC: physiotherapy care, PE: pain education, PE+PC: pain education delivered with physiotherapy care, UC: usual care.

**Supplementary Table 19.3** Fear avoidance at mid-term treatment sustainability

| Comparison   | n studies | Within-study bias | Reporting bias | Indirectness | Imprecision    | Heterogeneity | Incoherence    | Confidence rating |
|--------------|-----------|-------------------|----------------|--------------|----------------|---------------|----------------|-------------------|
| Adv:CBT      | 1         | Some concerns     | Undetected     | No concerns  | Major concerns | No concerns   | Major concerns | Low               |
| BT:CBT       | 1         | Some concerns     | Undetected     | No concerns  | Major concerns | No concerns   | Major concerns | Low               |
| CBT:CP       | 1         | Some concerns     | Undetected     | No concerns  | Some concerns  | Some concerns | Major concerns | Low               |
| CBT:NI       | 1         | Some concerns     | Undetected     | No concerns  | Some concerns  | Some concerns | Major concerns | Low               |
| CBT+PC:CP+PC | 1         | Some concerns     | Undetected     | No concerns  | Some concerns  | Some concerns | Major concerns | Low               |
| CBT+PC:PC    | 2         | Some concerns     | Undetected     | No concerns  | Some concerns  | Some concerns | Major concerns | Low               |





|          |   |               |            |             |                |               |                |     |
|----------|---|---------------|------------|-------------|----------------|---------------|----------------|-----|
| GP:PE+PC | 0 | Some concerns | Undetected | No concerns | Major concerns | No concerns   | Major concerns | Low |
| GP:UC    | 0 | Some concerns | Undetected | No concerns | Major concerns | No concerns   | Major concerns | Low |
| NI:PC    | 0 | Some concerns | Undetected | No concerns | Major concerns | No concerns   | Major concerns | Low |
| NI:PE    | 0 | Some concerns | Undetected | No concerns | Major concerns | No concerns   | Major concerns | Low |
| NI:PE+PC | 0 | Some concerns | Undetected | No concerns | Major concerns | No concerns   | Major concerns | Low |
| NI:UC    | 0 | Some concerns | Undetected | No concerns | Major concerns | No concerns   | Major concerns | Low |
| PC:UC    | 0 | Some concerns | Undetected | No concerns | Major concerns | No concerns   | Major concerns | Low |
| PE:PE+PC | 0 | Some concerns | Undetected | No concerns | Major concerns | No concerns   | Major concerns | Low |
| PE:UC    | 0 | Some concerns | Undetected | No concerns | Some concerns  | Some concerns | Major concerns | Low |
| PE+PC:UC | 0 | Some concerns | Undetected | No concerns | Major concerns | No concerns   | Major concerns | Low |

Adv: advice, BT: behavioural therapy, CBT: cognitive behavioural therapy, CBT+PC: cognitive behavioural therapy delivered with physiotherapy care, CP: combined psychological approaches, CP+PC: combined psychological approaches delivered with physiotherapy care, Csl: counselling, GP: general practitioner care, NI: no intervention, PC: physiotherapy care, PE: pain education, PE+PC: pain education delivered with physiotherapy care, UC: usual care.

**Comment.** Fear avoidance at long-term treatment sustainability

At long-term follow-up, the network became disconnected. We were unable to use CINeMA to perform the GRADE assessment.

## Supplementary S. Rank results for fear avoidance and intervention compliance

**Supplementary Table 20.1** Fear avoidance at post-intervention

| Rank             | Treatment Node     | SUCRA | Mean Rank |
|------------------|--------------------|-------|-----------|
| 1 <sup>st</sup>  | CBT+PC             | 81.8  | 3         |
| 2 <sup>nd</sup>  | PE                 | 67.7  | 4.5       |
| 3 <sup>rd</sup>  | CBT                | 59.4  | 5.5       |
| 4 <sup>th</sup>  | CP+PC              | 55.4  | 5.9       |
| 5 <sup>th</sup>  | Advice             | 53.8  | 6.1       |
| 6 <sup>th</sup>  | CP                 | 51    | 6.4       |
| 7 <sup>th</sup>  | Usual care         | 47.8  | 6.7       |
| 8 <sup>th</sup>  | Mindfulness        | 46.2  | 6.9       |
| 9 <sup>th</sup>  | BT                 | 40.9  | 7.5       |
| 10 <sup>th</sup> | PE+PC              | 39.1  | 7.7       |
| 11 <sup>th</sup> | No Intervention    | 29.1  | 8.8       |
| 12 <sup>th</sup> | Physiotherapy care | 27.8  | 8.9       |

BT: behavioural therapy, CBT: cognitive behavioural therapy, CBT+PC: cognitive behavioural therapy delivered with physiotherapy care, CP: combined psychological approaches, CP+PC: combined psychological approaches delivered with physiotherapy care, PE: pain education, PE+PC: pain education delivered with physiotherapy care.

**Supplementary Table 20.2** Fear avoidance at short-term treatment sustainability

| Rank            | Treatment Node     | SUCRA | Mean Rank |
|-----------------|--------------------|-------|-----------|
| 1 <sup>st</sup> | CP                 | 90.4  | 1.7       |
| 2 <sup>nd</sup> | PE                 | 73    | 2.9       |
| 3 <sup>rd</sup> | Usual care         | 66.9  | 3.3       |
| 4 <sup>th</sup> | GP care            | 61.8  | 3.7       |
| 5 <sup>th</sup> | PE+PC              | 57.6  | 4         |
| 6 <sup>th</sup> | CBT+PC             | 19.3  | 6.7       |
| 7 <sup>th</sup> | Physiotherapy care | 17.4  | 6.8       |
| 8 <sup>th</sup> | CP+PC              | 13.6  | 7         |

CBT+PC: cognitive behavioural therapy delivered with physiotherapy care, CP: combined psychological approaches, CP+PC: combined psychological approaches delivered with physiotherapy care, GP care: general practitioner care, PE: pain education, PE+PC: pain education delivered with physiotherapy care.

**Supplementary Table 20.3** Fear avoidance at mid-term treatment sustainability

| Rank             | Treatment Node     | SUCRA | Mean Rank |
|------------------|--------------------|-------|-----------|
| 1 <sup>st</sup>  | PE                 | 80.5  | 3.3       |
| 2 <sup>nd</sup>  | CBT+PC             | 73.2  | 4.2       |
| 3 <sup>rd</sup>  | PE+PC              | 64.5  | 5.3       |
| 4 <sup>th</sup>  | CBT                | 61.3  | 5.6       |
| 5 <sup>th</sup>  | Advice             | 58.7  | 6         |
| 6 <sup>th</sup>  | BT                 | 54.6  | 6.4       |
| 7 <sup>th</sup>  | CP+PC              | 54    | 6.5       |
| 8 <sup>th</sup>  | CP                 | 42    | 8         |
| 9 <sup>th</sup>  | Physiotherapy care | 40    | 8.2       |
| 10 <sup>th</sup> | Csl                | 37.7  | 8.5       |
| 11 <sup>th</sup> | GP care            | 32.1  | 9.2       |
| 12 <sup>th</sup> | No intervention    | 27.6  | 9.7       |
| 13 <sup>th</sup> | Usual care         | 24    | 10.1      |

BT: behavioural therapy, CBT: cognitive behavioural therapy, CBT+PC: cognitive behavioural therapy delivered with physiotherapy care, CP: combined psychological approaches, CP+PC: combined psychological approaches delivered with physiotherapy care, Csl: counselling, GP care: general practitioner care, PE: pain education, PE+PC: pain education delivered with physiotherapy care.

**Comment.** Fear avoidance at long-term treatment sustainability

NMA was not performed at long-term treatment sustainability for fear avoidance as the network became disconnected.

**Supplementary Table 20.4** Intervention compliance at post-intervention

| Rank             | Treatment Node     | SUCRA | Mean Rank |
|------------------|--------------------|-------|-----------|
| 1 <sup>st</sup>  | CP                 | 78.7  | 2.9       |
| 2 <sup>nd</sup>  | Usual care         | 74.6  | 3.3       |
| 3 <sup>rd</sup>  | GP care            | 64.9  | 4.2       |
| 4 <sup>th</sup>  | PE+PC              | 56.3  | 4.9       |
| 5 <sup>th</sup>  | CP+PC              | 54.6  | 5.1       |
| 6 <sup>th</sup>  | BT+PC              | 51.9  | 5.3       |
| 7 <sup>th</sup>  | PE                 | 43.1  | 6.1       |
| 8 <sup>th</sup>  | CBT+PC             | 35.4  | 6.8       |
| 9 <sup>th</sup>  | Csl+PC             | 21.5  | 8.1       |
| 10 <sup>th</sup> | Physiotherapy care | 18.9  | 8.3       |

BT+PC: behavioural therapy delivered with physiotherapy care, CBT+PC: cognitive behavioural therapy delivered with physiotherapy care, CP: combined psychological approaches, CP+PC: combined psychological approaches delivered with physiotherapy care, Csl+PC: counselling delivered with physiotherapy care, GP care: general practitioner care, PE: pain education, PE+PC: pain education delivered with physiotherapy care.

**Supplementary T. Comparison-adjusted funnel plots for fear avoidance and intervention compliance**

**Supplementary Figure 21. Fear avoidance at post-intervention**

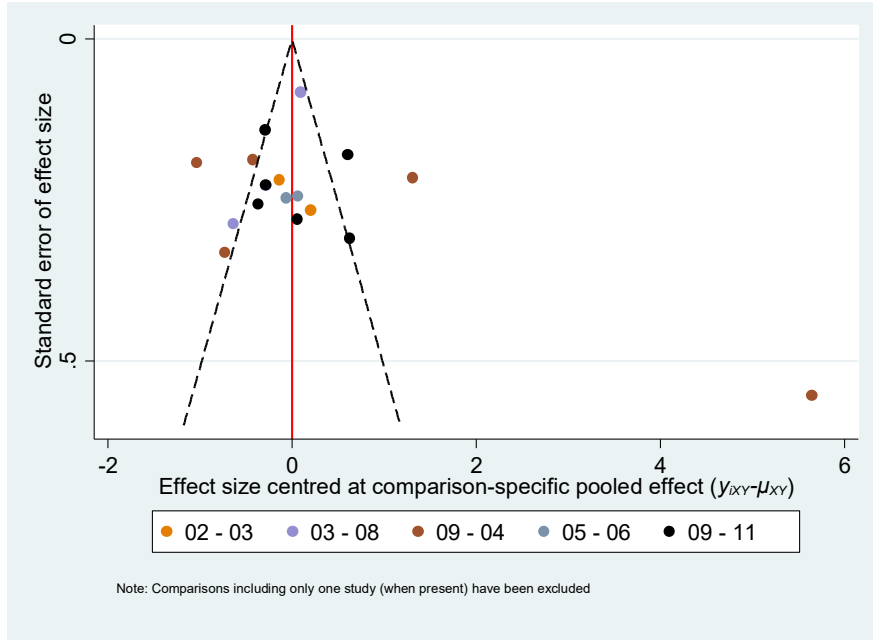

01: advice, 02: behavioural therapy, 03: cognitive behavioural therapy, 04: cognitive behavioural therapy delivered with physiotherapy care, 05: combined psychological approaches, 06: combined psychological approaches delivered with physiotherapy care, 07: mindfulness, 08: no intervention, 09: physiotherapy care, 10: pain education, 11: pain education delivered with physiotherapy care, 12: usual care.

**Supplementary Figure 22. Fear avoidance at short-term treatment sustainability**

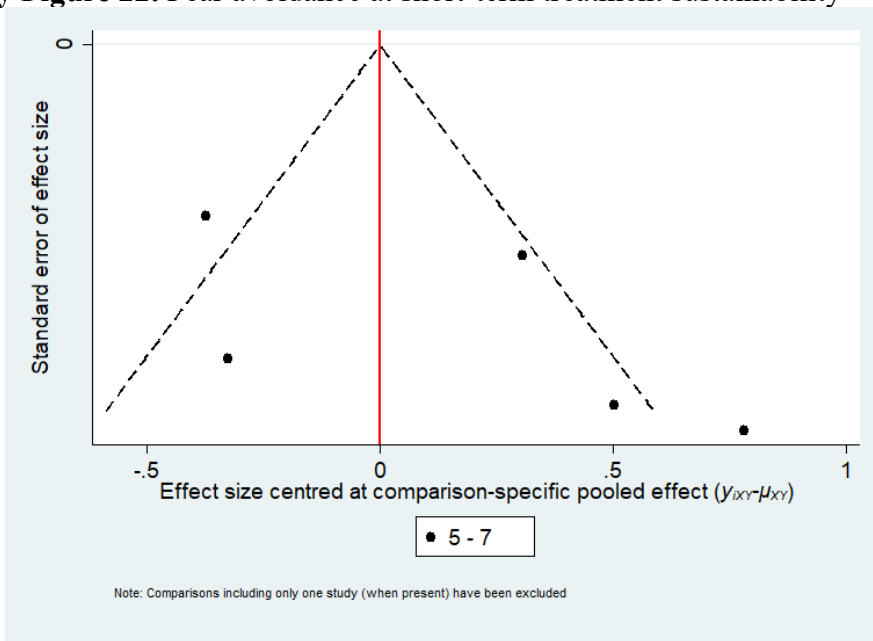

01: cognitive behavioural therapy delivered with physiotherapy care, 02: combined psychological approaches, 03: combined psychological approaches delivered with physiotherapy care, 04: general practitioner care, 05: physiotherapy care, 06: pain education, 07: pain education delivered with physiotherapy care, 08: usual care.



**Supplementary Figure 23.** Fear avoidance at mid-term treatment sustainability

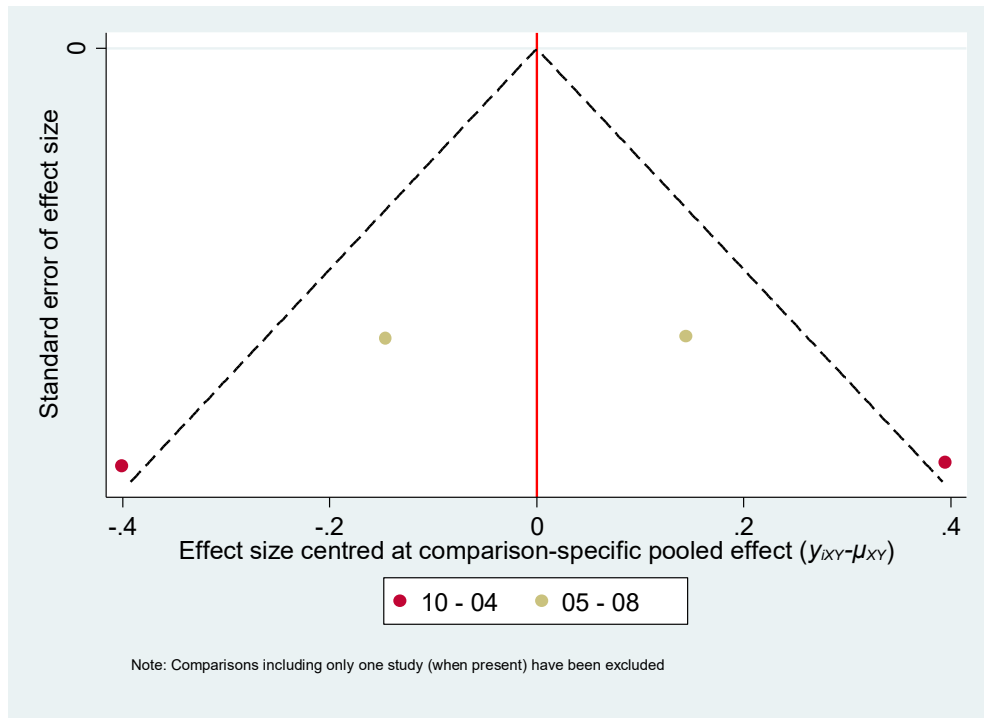

01: advice, 02: behavioural therapy, 03: cognitive behavioural therapy, 04: cognitive behavioural therapy delivered with physiotherapy care, 05: combined psychological approaches, 06: combined psychological approaches delivered with physiotherapy care, 07: counselling, 08: general practitioner care, 09: no intervention, 10: physiotherapy care, 11: pain education, 12: pain education delivered with physiotherapy care, 13: usual care.

**Supplementary Figure 24.** Fear avoidance at long-term treatment sustainability

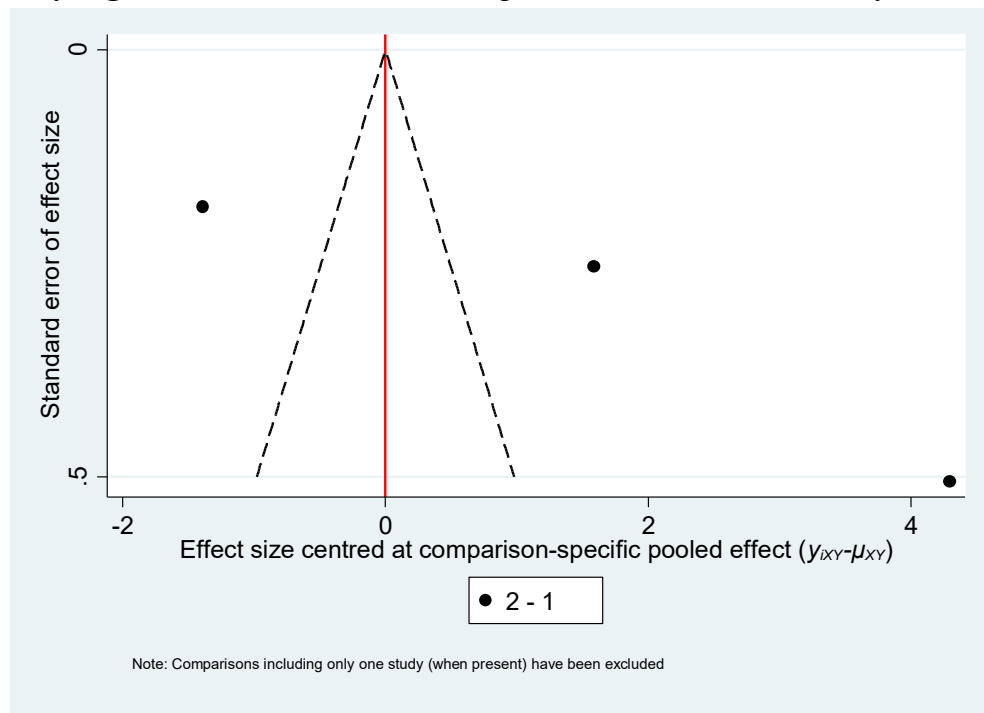

01: cognitive behavioural therapy delivered with physiotherapy care, 02: physiotherapy care.

**Supplementary Figure 25. Intervention compliance at post-intervention**

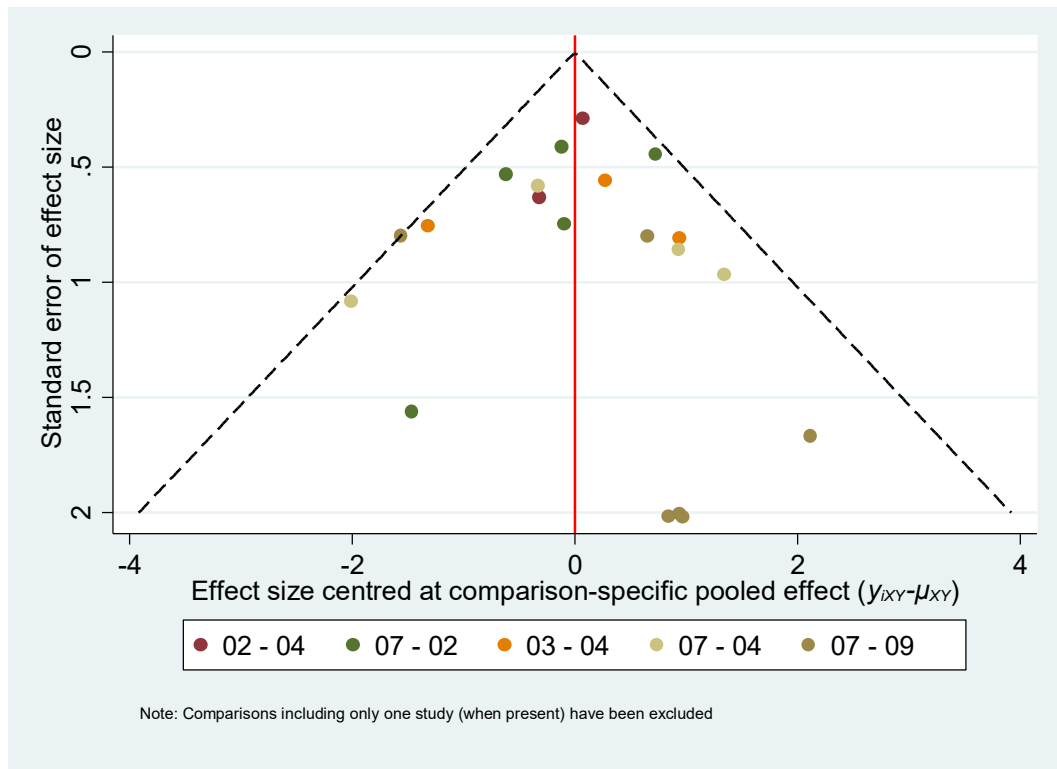

01: behavioural therapy delivered with physiotherapy care, 02: cognitive behavioural therapy delivered with physiotherapy care, 03: combined psychological approaches, 04: combined psychological approaches delivered with physiotherapy care, 05: counselling delivered with physiotherapy care, 06: general practitioner care, 07: physiotherapy care, 08: pain education, 09: pain education delivered with physiotherapy care, 10: usual care.

## Supplementary U. Summary of health-related quality of life

The following table presents the effect sizes for all studies included in the review which report data on health-related quality of life. The results of the studies involving at least one treatment node classified as physiotherapy care (PC) have been summarised in the main paper.

**Supplementary Table 21.** Effect sizes for health-related quality of life

| Author, Year                                                 | Treatment nodes                   | Outcome     | Results <sup>a</sup>                                                                                                                                                                                                                                                                                                                                                                                                                                                                                                                                          |
|--------------------------------------------------------------|-----------------------------------|-------------|---------------------------------------------------------------------------------------------------------------------------------------------------------------------------------------------------------------------------------------------------------------------------------------------------------------------------------------------------------------------------------------------------------------------------------------------------------------------------------------------------------------------------------------------------------------|
| <b>SF-36 physical component summary score provided</b>       |                                   |             |                                                                                                                                                                                                                                                                                                                                                                                                                                                                                                                                                               |
| Dufour, 2010[15]                                             | CP+PC vs PC                       | SF-36 (PCS) | Post-intervention: assessed but between-group differences not analysed<br>Short-term follow-up: <b><math>p &lt; 0.001</math> (favouring CP+PC)</b><br>Mid-term follow-up: assessed but between-group differences not analysed<br>Long-term follow-up: assessed but between-group differences not analysed                                                                                                                                                                                                                                                     |
| Galan-Martin, 2020[21]                                       | PE+PC vs PC                       | SF-36 (PCS) | Post-intervention: results of between-group differences were not reported.<br>Short-term follow-up: <b>12 (9.6 to 14.4), <math>p &lt; 0.001</math> (favouring PE+PC).</b>                                                                                                                                                                                                                                                                                                                                                                                     |
| Yao, 2020[98]                                                | Mind+PC vs PC                     | SF-36 (PCS) | Post-intervention: 3.1 (-1.8 to 8.0), $p > 0.05$ .                                                                                                                                                                                                                                                                                                                                                                                                                                                                                                            |
| Saper, 2017[73]                                              | Mind+PC vs PE                     | SF-36 (PCS) | Post-intervention: 0.62 (-1.6 to 2.9), $p > 0.05$                                                                                                                                                                                                                                                                                                                                                                                                                                                                                                             |
| Fairbank, 2005[16]                                           | CBT+PC vs Surgery (Lumbar Fusion) | SF-36 (PCS) | Post-intervention: between-group differences were not assessed.<br>Long-term follow-up: 2.0 (-1.2 to 5.3), $p > 0.05$ .                                                                                                                                                                                                                                                                                                                                                                                                                                       |
| Cuesta-Vargas, 2011[14]                                      | PE+PC vs PE+PC                    | SF-36 (PCS) | Post-intervention: Mean difference 5.1, standard deviation 11.2. Results were not statistically significant.                                                                                                                                                                                                                                                                                                                                                                                                                                                  |
| <b>SF-12 physical component summary (PCS) score provided</b> |                                   |             |                                                                                                                                                                                                                                                                                                                                                                                                                                                                                                                                                               |
| Godfrey, 2019[28]                                            | Mind+PC vs PC                     | SF-12 (PCS) | Post-intervention: between-group differences were not assessed.<br>Short-term follow-up: <b>mean difference 1.91, standard error 0.89, <math>p = 0.032</math> (favouring Mind+PC).</b><br>Mid-term follow-up: Mean difference 0.48, standard error 1.01, $p = 0.637$                                                                                                                                                                                                                                                                                          |
| Cherkin, 2016[11]                                            | Mind vs UC vs CBT                 | SF-12 (PCS) | Post-intervention: <ul style="list-style-type: none"> <li>• Mind vs UC: 1.48 (-0.06 to 3.02), <math>p &gt; 0.05</math></li> <li>• CBT vs Mind: -0.45 (-1.95 to 1.05), <math>p &gt; 0.05</math></li> <li>• CBT vs UC: 1.03 (-0.48 to 2.54), <math>p &gt; 0.05</math></li> </ul> Mid-term follow-up: <ul style="list-style-type: none"> <li>• Mind vs UC: 0.31 (-1.53 to 2.16), <math>p &gt; 0.05</math></li> <li>• CBT vs Mind: 0.20 (-1.69 to 2.10), <math>p &gt; 0.05</math></li> <li>• CBT vs UC: 0.52 (-1.19 to 2.22), <math>p &gt; 0.05</math></li> </ul> |

|                                                                                                                                        |                |                        |                                                                                                                                                                                                                                                                                                                                                           |
|----------------------------------------------------------------------------------------------------------------------------------------|----------------|------------------------|-----------------------------------------------------------------------------------------------------------------------------------------------------------------------------------------------------------------------------------------------------------------------------------------------------------------------------------------------------------|
| Lamb, 2010[39]                                                                                                                         | CBT vs NI      | SF-12 (PCS)            | Post-intervention: <b>-2.2 (-3.57 to -0.74), <math>p = 0.0031</math> (favouring CBT).</b><br>Short-term follow-up: <b>-1.8 (-3.25 to -0.37), <math>p = 0.0144</math> (favouring CBT).</b><br>Mid-term follow-up: <b>-4.1 (-5.62 to -2.63), <math>p &lt; 0.0001</math> (favouring CBT).</b>                                                                |
| Macedo, 2012[46]                                                                                                                       | CP+PC vs CP    | SF-12 (PCS)            | Post-intervention: -0.2 (-3.7 to 3.2), $p = 0.89$<br>Short-term follow-up: 1.1 (-2.4 to 4.6), $p = 0.54$<br>Mid-term follow-up: -0.3 (-3.8 to 3.3), $p = 0.33$                                                                                                                                                                                            |
| Nguyen, 2017[58]                                                                                                                       | PE+PC vs PE    | SF-12 (PCS)            | Post-intervention: between-group differences were not assessed.<br>Mid-term follow-up: -0.3 (-4.5 to 3.9), $p = 0.89$                                                                                                                                                                                                                                     |
| Tilbrook, 2011[87]                                                                                                                     | CP+PC vs PE    | SF-12 (PCS)            | Post-intervention: 1.36 (-0.70 to 3.41), $p = 0.20$<br>Short-term follow-up: 1.24 (-0.83 to 3.33), $p = 0.24$<br>Mid-term follow-up: 0.80 (-1.28 to 2.87), $p = 0.45$                                                                                                                                                                                     |
| <b>SF-36: Scores for all SF-36 sub-scales assessed; however, no physical health or mental health component summary scores provided</b> |                |                        |                                                                                                                                                                                                                                                                                                                                                           |
| Mehling, 2005[49]                                                                                                                      | Mind+PC vs PC  | SF-36 (all sub-scales) | Post-intervention: $p > 0.05$ for all SF-36 sub-scales.<br>Mid-term follow-up: $p > 0.05$ for all SF-36 sub-scales.                                                                                                                                                                                                                                       |
| Monticone, 2013[51]                                                                                                                    | CBT+PC vs PC   | SF-36 (all sub-scales) | Post-intervention: results of between-group differences were not reported.<br>Interaction (group x time) assessed at long-term follow-up: <b><math>p &lt; 0.05</math> for all SF-36 sub-scales (favouring CBT+PC).</b>                                                                                                                                    |
| Monticone, 2016[52]                                                                                                                    | CBT+PC vs PC   | SF-36 (all sub-scales) | Post-intervention: results of between-group differences were not reported.<br>Interaction (group x time) assessed at long-term follow-up: <b><math>p &lt; 0.05</math> for all SF-36 sub-scales (favouring CBT+PC).</b>                                                                                                                                    |
| Poole, 2007[65]                                                                                                                        | BT vs PC vs UC | SF-36 (all sub-scales) | Post-intervention: results of between-group differences were not reported.<br>Interaction (group x time) assessed at short-term follow-up: $p > 0.05$ for all SF-36 sub-scales.                                                                                                                                                                           |
| Saracoglu, 2020[75]                                                                                                                    | PE+PC vs PC    | SF-36 (all sub-scales) | Post-intervention: <ul style="list-style-type: none"> <li>Physical function: <b><math>r = -0.35, p = 0.04</math> (favouring PE+PC).</b></li> <li>For all other SF-36 sub-scales, <math>p &gt; 0.05</math></li> </ul>                                                                                                                                      |
| Unal, 2020[92]                                                                                                                         | PE vs PC       | SF-36 (all sub-scales) | Post-intervention: <ul style="list-style-type: none"> <li>Physical functioning: <b><math>p &lt; 0.001</math> (favouring PC)</b></li> <li>Physical role: <b><math>p = 0.003</math> (favouring PC)</b></li> <li>Mental health: <b><math>p &lt; 0.001</math> (favouring PC)</b></li> <li>For all other SF-36 sub-scales, <math>p &gt; 0.05</math></li> </ul> |
| Tavafian, 2017[85]                                                                                                                     | CP vs GP       | SF-36 (all sub-scales) | Interaction (group x time) assessed at long-term follow-up: <ul style="list-style-type: none"> <li>Mental health: <b><math>p &lt; 0.05</math> (favouring CP).</b></li> </ul>                                                                                                                                                                              |

|                                                                                                                                      |                |                          |                                                                                                                                                                                                                                                                                                                                                                                                                |
|--------------------------------------------------------------------------------------------------------------------------------------|----------------|--------------------------|----------------------------------------------------------------------------------------------------------------------------------------------------------------------------------------------------------------------------------------------------------------------------------------------------------------------------------------------------------------------------------------------------------------|
|                                                                                                                                      |                |                          | <ul style="list-style-type: none"> <li>For all other SF-36 sub-scales, <math>p &gt; 0.05</math></li> </ul>                                                                                                                                                                                                                                                                                                     |
| Michaelson, 2016[50]                                                                                                                 | PE+PC vs PE+PC | SF-36 (all sub-scales)   | Post-intervention: $p > 0.05$ for all SF-36 sub-scales.<br>Mid-term follow-up: $p > 0.05$ for all SF-36 sub-scales.                                                                                                                                                                                                                                                                                            |
| Luedtke, 2016[43]                                                                                                                    | CP+PC vs CP+PC | RAND-36 (all sub-scales) | Post-intervention: $p > 0.05$ for all RAND-36 subscales.                                                                                                                                                                                                                                                                                                                                                       |
| <b>SF-36: Only overall score provided. No sub-scale scores or physical health or mental health component summary scores provided</b> |                |                          |                                                                                                                                                                                                                                                                                                                                                                                                                |
| Gardner, 2019[23]                                                                                                                    | PE vs PC       | SF-36 (overall score)    | Post-treatment: <b>-15.8 (-24.2 to -7.4), <math>p &lt; 0.05</math> (favouring PE).</b><br>Short-term follow-up: <b>-17.7 (-26.0 to -9.5), <math>p &lt; 0.05</math> (favouring PE).</b><br>Mid-term follow-up: <b>-19.5 (-27.9 to -11.0), <math>p &lt; 0.05</math> (favouring PE).</b>                                                                                                                          |
| <b>SF-36 only some components assessed and/or reported</b>                                                                           |                |                          |                                                                                                                                                                                                                                                                                                                                                                                                                |
| Magalhaes, 2018[47]                                                                                                                  | CP+PC vs PC    | SF-36 (some sub-scales)  | SF-36 sub-scales assessed: physical role, emotional role.<br>Post-intervention: $p > 0.05$ for the SF-36 sub-scales assessed.<br>Short-term follow-up: $p > 0.05$ for the SF-36 sub-scales assessed.                                                                                                                                                                                                           |
| Paolucci, 2017[61]                                                                                                                   | Mind+PC vs PC  | SF-36 (some sub-scales)  | SF-36 sub-scales assessed and reported (i.e., between-group data available): vitality, social functioning.<br>Post-intervention: results of between-group differences were not reported.<br>Short-term follow-up: <ul style="list-style-type: none"> <li>Vitality: <b><math>p = 0.033</math> (favouring PC).</b></li> <li>Social functioning: <b><math>p = 0.022</math> (favouring PC).</b></li> </ul>         |
| Vong, 2011[96]                                                                                                                       | Csl+PC, PC     | SF-36 (some sub-scales)  | SF-36 sub-scales assessed: physical functioning, physical role, bodily pain, global health.<br>Post-intervention: <ul style="list-style-type: none"> <li>Global health: <b><math>F = 6.21, p = 0.015</math> (favouring Csl+PC)</b></li> <li>For all other SF-36 sub-scales, <math>p &gt; 0.05</math> for group x time interaction.</li> </ul>                                                                  |
| Haas, 2005[31]                                                                                                                       | CP vs NI       | SF-36 (some sub-scales)  | SF-36 sub-scales assessed: general health, emotional well-being (mental health), and energy-fatigue (vitality).<br>Post-intervention: between-group differences were not assessed.<br>Short-term follow-up: <ul style="list-style-type: none"> <li>Mental health: <b>mean 7.6, SE 3.6, <math>p = 0.037</math> (favouring CP).</b></li> <li>For all other SF-36 sub-scales, <math>p &gt; 0.05</math></li> </ul> |
| Jensen, 2012[33]                                                                                                                     | Csl vs UC      | SF-36 (some sub-scales)  | SF-36 sub-scales assessed: physical functioning, bodily pain.<br>Post-intervention: <ul style="list-style-type: none"> <li>Physical functioning: <b>5.60 (1.39 to 9.81), <math>p &lt; 0.05</math> (favouring Csl).</b></li> </ul>                                                                                                                                                                              |

|                                       |                         |                           |                                                                                                                                                                                                                                                                                                                                                                                            |
|---------------------------------------|-------------------------|---------------------------|--------------------------------------------------------------------------------------------------------------------------------------------------------------------------------------------------------------------------------------------------------------------------------------------------------------------------------------------------------------------------------------------|
|                                       |                         |                           | <ul style="list-style-type: none"> <li>Bodily pain: <b>6.27 (0.70 to 11.83), <math>p &lt; 0.05</math> (favouring Csl)</b></li> </ul>                                                                                                                                                                                                                                                       |
| Moore, 2000[53]                       | CP vs GP                | SF-36 (some sub-scales)   | <p>SF-36 sub-scales assessed: mental health.<br/> Post-intervention: between-group differences were not assessed.<br/> Short-term follow-up: <math>p &gt; 0.05</math><br/> Mid-term follow-up: <math>p &gt; 0.05</math></p>                                                                                                                                                                |
| von Korff, 2005[95]                   | CP vs UC                | SF-36 (some sub-scales)   | <p>SF-36 sub-scales assessed: social functioning, mental health.<br/> Post-intervention: <math>p &gt; 0.05</math> for both SF-36 sub-scales.<br/> Short-term follow-up: <math>p &gt; 0.05</math> for both SF-36 sub-scales.<br/> Mid-term follow-up: <math>p &gt; 0.05</math> for both SF-36 sub-scales.<br/> Long-term follow-up: <math>p &gt; 0.05</math> for both SF-36 sub-scales.</p> |
| Morone, 2016[54]                      | Mind vs Adv             | RAND-36 (some sub-scales) | <p>RAND-36 composite scores assessed: global health composite, physical health composite.<br/> Interaction (group x time) assessed at mid-term follow-up:</p> <ul style="list-style-type: none"> <li>Global health composite: <b><math>p = 0.02</math> (favouring Mind).</b></li> <li>Physical health composite: <b><math>p = 0.02</math> (favouring Mind).</b></li> </ul>                 |
| <b>EuroQoL-5D<sup>b</sup></b>         |                         |                           |                                                                                                                                                                                                                                                                                                                                                                                            |
| Johnson, 2007[34]                     | CBT vs GP               | EQ-5D                     | <p>Post-intervention: 0.05 (-0.01 to 0.11), <math>p &gt; 0.05</math><br/> Mid-term follow-up: 0.03 (-0.05 to 0.10), <math>p &gt; 0.05</math><br/> Long-term follow-up: 0.03 (-0.04 to 0.09), <math>p &gt; 0.05</math></p>                                                                                                                                                                  |
| <b>Other: Sickness Impact Profile</b> |                         |                           |                                                                                                                                                                                                                                                                                                                                                                                            |
| Turner, 1990[90]                      | BT+PC vs BT vs PC vs NI | SIP                       | <p>Post-intervention: Results of univariate between-group analyses for health-related quality of life were not reported by authors. Descriptive results report there were no statistically significant between-group differences at post-treatment, or mid-term and long-term follow-ups.</p>                                                                                              |
| Turner, 1982[88]                      | BT vs CBT vs NI         | SIP                       | <p>Interaction (group x time) assessed at post-intervention: <b><math>F(2, 33) = 8.47, p &lt; 0.001</math> (favouring CBT).</b></p>                                                                                                                                                                                                                                                        |
| Turner, 1988[89]                      | CBT vs BT vs NI         | SIP                       | <p>Interaction (group x time) assessed at post-intervention (CBT vs BT vs NI): <b><math>F(2, 70) = 4.12, p &lt; 0.05</math> (favouring BT).</b><br/> Interaction (group x time) assessed at short-term follow-up (CBT vs BT only): <math>p &gt; 0.05</math><br/> Interaction (group x time) assessed at mid-term follow-up (CBT vs BT only): <math>p &gt; 0.05</math></p>                  |
| Turner, 1993[91]                      | CBT (2 arms) vs BT vs   | SIP                       | <p>Interaction (group x time) assessed at post-intervention: <math>p &gt; 0.05</math></p>                                                                                                                                                                                                                                                                                                  |

|                                       |                         |                                                                                                                                                                                                    |                                                                                                                                                                                                                                                                                                                          |
|---------------------------------------|-------------------------|----------------------------------------------------------------------------------------------------------------------------------------------------------------------------------------------------|--------------------------------------------------------------------------------------------------------------------------------------------------------------------------------------------------------------------------------------------------------------------------------------------------------------------------|
|                                       | NI                      |                                                                                                                                                                                                    | Interaction (group x time) assessed at short-term follow-up: $p > 0.05$<br>Interaction (group x time) assessed at mid-term follow-up: $p > 0.05$                                                                                                                                                                         |
| <b>Other: Miscellaneous</b>           |                         |                                                                                                                                                                                                    |                                                                                                                                                                                                                                                                                                                          |
| Bendix, 2000[8]                       | CBT+PC vs PC            | Investigator-initiated question: “How much has the treatment influenced your quality of life? Has the treatment made it 1 (much better), 2 (better), 3 (unchanged), 4 (worse), or 5 (much worse).” | Post-intervention: between-group differences were not assessed.<br>Mid-term follow-up: $p = 0.03$ (favouring CBT+PC).                                                                                                                                                                                                    |
| Shariat, 2019[77]                     | BT+PC vs BT vs PC vs NI | Quality of Life Scale                                                                                                                                                                              | Post-intervention: between-group differences were not assessed.<br>Interaction (group x time) assessed at short-term follow-up: results not reported clearly.                                                                                                                                                            |
| Bendix, 1998[6] & 1998[7] (Project B) | CP+PC vs CBT+PC vs PC   | Investigator-initiated question (scores ranged from 1-5)                                                                                                                                           | Post-intervention: between-group differences were not assessed.<br>Long-term follow-up: <ul style="list-style-type: none"> <li>• 2-years post-intervention: <math>p = 0.005</math> (favouring CP+PC).</li> <li>• 5-year post-intervention: <math>p = 0.004</math> (favouring CP+PC).</li> </ul>                          |
| Bendix, 1998[6] & 1998[7] (Project A) | CP+PC vs NI             | Investigator-initiated question (scores ranged from 1-5)                                                                                                                                           | Post-intervention: between-group differences were not assessed.<br>Long-term follow-up: <ul style="list-style-type: none"> <li>• 2-years post-intervention: <math>p &gt; 0.05</math></li> <li>• 5-year post-intervention: <math>p &gt; 0.05</math></li> </ul>                                                            |
| Sander, 2020[71]                      | CP vs UC                | AQoL-6D                                                                                                                                                                                            | Post-intervention: <b>-0.25 (-0.42 to -0.08), <math>p</math> values not reported (favouring CP).</b><br>Short-term follow-up: <b>-0.24 (-0.42 to -0.05), <math>p</math> values not reported (favouring CP).</b><br>Mid-term follow-up: <b>-0.43 (-0.61 to -0.25), <math>p</math> values not reported (favouring CP).</b> |
| O'Keeffe, 2020[60]                    | CBT+PC vs CP+PC         | General Health (0-13)                                                                                                                                                                              | Post-intervention: <b>2.29 (0.33 to 4.24), <math>p = 0.022</math> (favouring CBT+PC).</b><br>Mid-term follow-up: 1.91 (0.19 to 4.01), $p = 0.075$                                                                                                                                                                        |
| Glombiewski,                          | CBT vs CBT              | Health-Related Life                                                                                                                                                                                | Post-intervention: results of between-group differences were not reported.                                                                                                                                                                                                                                               |

|                 |          |                             |                                                                                                                                                                                                                                                         |
|-----------------|----------|-----------------------------|---------------------------------------------------------------------------------------------------------------------------------------------------------------------------------------------------------------------------------------------------------|
| 2010[26]        |          | Satisfaction Scale          | Descriptive results report no statistically significant difference between groups.<br>Mid-term follow-up: results of between-group differences were not reported.<br>Descriptive results report no statistically significant difference between groups. |
| Lorig, 2002[44] | PE vs UC | Illness Intrusiveness Scale | Post-intervention: between-group differences were not assessed.<br>Long-term follow-up: <b><math>p &lt; 0.001</math> (favouring PE)</b> .                                                                                                               |

<sup>a</sup> Values are mean difference between groups (95% confidence interval), unless stated otherwise. Estimates in bold denote significance at  $p < 0.05$ .

<sup>b</sup> Results of Reme et al. 2016[68] have not been summarised, as only two of the four study arms were included in our review and only ANOVA results involving all four arms were reported in the original article.

Adv: advice, AQoL: Assessment of Quality of Life Questionnaire, BT: behavioural therapy, BT+PC: behavioural therapy delivered with physiotherapy care, CBT: cognitive behavioural therapy, CBT+PC: cognitive behavioural therapy delivered with physiotherapy care, CP: combined psychological approaches, CP+PC: combined psychological approaches delivered with physiotherapy care, Csl: counselling, Csl+physio care: counselling delivered with physiotherapy care, EuroQoL: European Quality of Life Scale, GP: general practitioner care, Mind: mindfulness, Mind+PC: mindfulness delivered with physiotherapy care, NI: no intervention, PE: pain education, PE+PC: pain education delivered with physiotherapy care, PC: physiotherapy care, SIP: Sickness Impact Profile, SF-12: 12-Item Short-form Survey, SF-36: 36-Item Short-form Survey, UC: usual care.



## Supplementary V. Sensitivity analyses for fear avoidance and intervention compliance

**Supplementary Table 22.1** Fear avoidance at post-intervention, excluding studies with high risk of bias

|                                   |                                   |                        |                        |                        |                        |                        |                        |                        |                        |                        |                       |                        |
|-----------------------------------|-----------------------------------|------------------------|------------------------|------------------------|------------------------|------------------------|------------------------|------------------------|------------------------|------------------------|-----------------------|------------------------|
| PC<br>(reference)                 | <b>1.94</b><br><b>(0.63,3.25)</b> |                        |                        |                        |                        |                        | -0.14 (-<br>3.02,2.74) | 1.31 (-<br>1.65,4.26)  |                        |                        |                       |                        |
| <b>1.79</b><br><b>(0.58,2.99)</b> | CBT+PC                            |                        |                        |                        |                        |                        | -0.33 (-<br>3.20,2.55) |                        |                        |                        |                       |                        |
| 0.84 (-<br>0.32,1.99)             | -0.95 (-<br>2.62,0.72)            | PE+PC                  |                        |                        |                        |                        |                        |                        |                        |                        |                       |                        |
| 0.24 (-<br>2.83,3.30)             | -1.55 (-<br>4.74,1.64)            | -0.60 (-<br>3.88,2.68) | Advice                 | 0.13 (-<br>2.78,3.04)  |                        |                        |                        | 1.25 (-<br>1.70,4.21)  |                        |                        | 0.18 (-<br>2.62,2.98) |                        |
| 0.65 (-<br>2.36,3.67)             | -1.13 (-<br>4.25,1.99)            | -0.18 (-<br>3.41,3.05) | 0.42 (-<br>1.96,2.80)  | CBT                    | -0.06 (-<br>2.98,2.85) |                        |                        |                        | -0.66 (-<br>2.73,1.40) | -0.34 (-<br>3.16,2.48) |                       |                        |
| 0.93 (-<br>1.35,3.22)             | -0.85 (-<br>3.25,1.54)            | 0.10 (-<br>2.46,2.66)  | 0.70 (-<br>1.96,3.35)  | 0.28 (-<br>2.01,2.56)  | CP                     |                        | -0.15 (-<br>2.24,1.93) | -0.13 (-<br>3.05,2.79) | -0.79 (-<br>3.74,2.16) |                        |                       | -0.37 (-<br>3.17,2.43) |
| 0.72 (-<br>1.15,2.59)             | -1.06 (-<br>3.00,0.87)            | -0.11 (-<br>2.31,2.08) | 0.49 (-<br>2.51,3.48)  | 0.07 (-<br>2.73,2.87)  | -0.21 (-<br>2.02,1.60) | CP+PC                  |                        |                        |                        |                        |                       |                        |
| 1.20 (-<br>1.07,3.46)             | -0.59 (-<br>3.05,1.87)            | 0.36 (-<br>2.18,2.90)  | 0.96 (-<br>1.44,3.36)  | 0.54 (-<br>2.09,3.18)  | 0.26 (-<br>1.82,2.35)  | 0.47 (-<br>1.87,2.82)  |                        | PE                     |                        |                        |                       |                        |
| 0.06 (-<br>3.16,3.27)             | -1.73 (-<br>5.03,1.58)            | -0.78 (-<br>4.19,2.64) | -0.18 (-<br>3.07,2.72) | -0.59 (-<br>2.54,1.36) | -0.87 (-<br>3.34,1.59) | -0.66 (-<br>3.65,2.32) | -1.14 (-<br>4.06,1.78) | No<br>intervention     |                        |                        |                       |                        |
| 0.32 (-<br>3.81,4.45)             | -1.47 (-<br>5.68,2.74)            | -0.52 (-<br>4.81,3.77) | 0.08 (-<br>3.61,3.77)  | -0.34 (-<br>3.16,2.48) | -0.62 (-<br>4.25,3.01) | -0.41 (-<br>4.38,3.57) | -0.88 (-<br>4.74,2.98) | 0.26 (-<br>3.17,3.69)  |                        | BT                     |                       |                        |
| 0.42 (-<br>3.73,4.57)             | -1.37 (-<br>5.61,2.88)            | -0.42 (-<br>4.73,3.89) | 0.18 (-<br>2.62,2.98)  | -0.23 (-<br>3.91,3.44) | -0.51 (-<br>4.37,3.34) | -0.30 (-<br>4.40,3.79) | -0.78 (-<br>4.47,2.91) | 0.36 (-<br>3.67,4.39)  | 0.10 (-<br>4.53,4.73)  |                        | Mindfulness           |                        |
| 0.56 (-<br>3.05,4.18)             | -1.22 (-<br>4.91,2.46)            | -0.27 (-<br>4.06,3.52) | 0.33 (-<br>3.53,4.19)  | -0.09 (-<br>3.70,3.53) | -0.37 (-<br>3.17,2.43) | -0.16 (-<br>3.49,3.18) | -0.63 (-<br>4.12,2.86) | 0.51 (-<br>3.22,4.24)  | 0.25 (-<br>4.33,4.83)  | 0.15 (-<br>4.62,4.91)  |                       | Usual care             |

Results are presented as standardised mean differences (SMD) and 95% confidence intervals. BT: behavioural therapy, CBT: cognitive behavioural therapy, CBT+PC: cognitive behavioural therapy delivered with physiotherapy care, CP: combined psychological approaches, CP+PC: combined psychological approaches delivered with physiotherapy care, PC: physiotherapy care, PE: pain education, PE+PC: pain education delivered with physiotherapy care. Estimates in bold denote significance at  $p < 0.05$ . SMD values less than 0.00 favour the column-defining treatment node for the NMA results (lower left triangle) and the row-defining treatment nodes for the pairwise meta-analysis results (upper right triangle). Note: Three studies [5, 17, 92] were excluded from the sensitivity analysis due to using ambiguous methods to score the Fear Avoidance Beliefs Questionnaire which were inconsistent with validated recommendations.

**Supplementary Table 22.2** Fear avoidance at post-intervention, only including studies using intention-to-treatment analysis

|                                     |                                     |                        |                        |                        |                        |                        |
|-------------------------------------|-------------------------------------|------------------------|------------------------|------------------------|------------------------|------------------------|
| PC<br>(reference)                   | <b>2.38</b><br>( <b>0.59,4.16</b> ) |                        |                        | -0.14 (-<br>3.65,3.37) | 1.31 (-<br>2.34,4.96)  |                        |
| <b>2.14</b><br>( <b>0.53,3.75</b> ) | CBT+PC                              |                        |                        | -0.33 (-<br>3.85,3.19) |                        |                        |
| 0.78 (-<br>0.93,2.49)               | -1.36 (-<br>3.70,0.99)              | PE+PC                  |                        |                        |                        |                        |
| 1.14 (-<br>1.70,3.98)               | -1.00 (-<br>3.98,1.99)              | 0.36 (-<br>2.95,3.68)  | CP                     | -0.15 (-<br>2.73,2.42) | -0.13 (-<br>3.77,3.50) | -0.37 (-<br>3.76,3.03) |
| 0.92 (-<br>1.39,3.22)               | -1.22 (-<br>3.61,1.17)              | 0.14 (-<br>2.73,3.00)  | -0.23 (-<br>2.44,1.98) | CP+PC                  |                        |                        |
| 1.16 (-<br>1.65,3.97)               | -0.98 (-<br>4.08,2.12)              | 0.38 (-<br>2.90,3.66)  | 0.02 (-<br>2.78,2.81)  | 0.24 (-<br>2.74,3.23)  | PE                     |                        |
| 0.78 (-<br>3.65,5.20)               | -1.36 (-<br>5.89,3.16)              | -0.00 (-<br>4.75,4.74) | -0.37 (-<br>3.76,3.03) | -0.14 (-<br>4.19,3.91) | -0.38 (-<br>4.78,4.02) | Usual care             |

Results are presented as standardised mean differences (SMD) and 95% confidence intervals. CBT+PC: cognitive behavioural therapy delivered with physiotherapy care, CP: combined psychological approaches, CP+PC: combined psychological approaches delivered with physiotherapy care, PC: physiotherapy care, PE: pain education, PE+PC: pain education delivered with physiotherapy care. Estimates in bold denote significance at  $p < 0.05$ . SMD values less than 0.00 favour the column-defining treatment node for the NMA results (lower left triangle) and the row-defining treatment nodes for the pairwise meta-analysis results (upper right triangle). Note: One study [17] was excluded from the sensitivity analysis due to using ambiguous methods to score the Fear Avoidance Beliefs Questionnaire which were inconsistent with validated recommendations.

**Comment.** Fear avoidance at post-intervention, excluding studies published prior to year 2000.

Sensitivity analysis was not performed, as no studies were excluded (i.e., all included studies were published after year 2004).

**Supplementary Table 22.3** Fear avoidance at post-intervention, excluding studies of patients with leg pain.

|                                   |                                   |                                       |                                   |                                       |                                       |                                   |                                       |                                       |                        |                        |                        |
|-----------------------------------|-----------------------------------|---------------------------------------|-----------------------------------|---------------------------------------|---------------------------------------|-----------------------------------|---------------------------------------|---------------------------------------|------------------------|------------------------|------------------------|
| PC<br>(reference)                 | 0.36 (-<br>0.14,0.86)             |                                       |                                   |                                       |                                       | -0.14 (-<br>1.00,0.72)            | <b>1.31</b><br><b>(0.50,2.12)</b>     |                                       |                        |                        |                        |
| 0.39 (-<br>0.04,0.82)             | CBT+PC                            |                                       |                                   |                                       |                                       | -0.33 (-<br>1.11,0.46)            |                                       |                                       |                        |                        |                        |
| <b>1.03</b><br><b>(0.61,1.45)</b> | <b>0.64</b><br><b>(0.03,1.24)</b> | PE+PC                                 |                                   |                                       |                                       |                                   |                                       |                                       |                        |                        |                        |
| -0.02 (-<br>0.93,0.89)            | -0.41 (-<br>1.37,0.55)            | <b>-1.05 (-</b><br><b>2.06,-0.04)</b> | Advice                            | 0.13 (-<br>0.60,0.87)                 |                                       |                                   | <b>1.25</b><br><b>(0.36,2.15)</b>     |                                       | 0.18 (-<br>0.55,0.91)  |                        |                        |
| 0.32 (-<br>0.55,1.19)             | -0.07 (-<br>0.98,0.84)            | -0.71 (-<br>1.68,0.26)                | 0.34 (-<br>0.31,0.99)             | CBT                                   | -0.06 (-<br>0.84,0.71)                |                                   |                                       | <b>-0.79 (-1.24,-</b><br><b>0.33)</b> |                        |                        | -0.68 (-<br>1.53,0.18) |
| 0.48 (-<br>0.19,1.15)             | 0.09 (-<br>0.62,0.80)             | -0.55 (-<br>1.34,0.25)                | 0.50 (-<br>0.26,1.26)             | 0.16 (-<br>0.48,0.79)                 | CP+PC                                 | -0.15 (-<br>0.72,0.41)            | -0.13 (-<br>0.77,0.51)                | -0.77 (-<br>1.63,0.08)                |                        | -0.37 (-<br>1.10,0.37) |                        |
| 0.14 (-<br>0.41,0.69)             | -0.25 (-<br>0.81,0.31)            | -0.89 (-<br>1.58,-0.20)               | 0.16 (-<br>0.72,1.04)             | -0.18 (-<br>0.99,0.62)                | -0.34 (-<br>0.88,0.20)                | CP+PC                             |                                       |                                       |                        |                        |                        |
| <b>0.92</b><br><b>(0.25,1.60)</b> | 0.53 (-<br>0.22,1.28)             | -0.11 (-<br>0.90,0.69)                | <b>0.94</b><br><b>(0.21,1.68)</b> | 0.60 (-<br>0.15,1.35)                 | 0.44 (-<br>0.16,1.04)                 | <b>0.78</b><br><b>(0.09,1.47)</b> | PE                                    |                                       |                        |                        |                        |
| -0.43 (-<br>1.35,0.48)            | -0.82 (-<br>1.77,0.13)            | <b>-1.46 (-</b><br><b>2.47,-0.45)</b> | -0.41 (-<br>1.18,0.36)            | <b>-0.75 (-</b><br><b>1.21,-0.29)</b> | <b>-0.91 (-</b><br><b>1.59,-0.23)</b> | -0.57 (-<br>1.42,0.27)            | <b>-1.35 (-</b><br><b>2.17,-0.54)</b> | No<br>intervention                    |                        |                        | 0.53 (-<br>0.36,1.42)  |
| 0.16 (-<br>1.01,1.33)             | -0.23 (-<br>1.43,0.97)            | -0.87 (-<br>2.11,0.38)                | 0.18 (-<br>0.55,0.91)             | -0.16 (-<br>1.14,0.82)                | -0.32 (-<br>1.38,0.74)                | 0.02 (-<br>1.12,1.16)             | -0.76 (-<br>1.80,0.27)                | 0.59 (-<br>0.47,1.65)                 | Mindfulness            |                        |                        |
| 0.11 (-<br>0.89,1.11)             | -0.28 (-<br>1.30,0.75)            | -0.92 (-<br>2.00,0.17)                | 0.13 (-<br>0.93,1.19)             | -0.21 (-<br>1.18,0.76)                | -0.37 (-<br>1.10,0.37)                | -0.03 (-<br>0.94,0.89)            | -0.81 (-<br>1.76,0.14)                | 0.55 (-<br>0.46,1.55)                 | -0.05 (-<br>1.34,1.24) | Usual care             |                        |
| -0.15 (-<br>1.30,1.00)            | -0.54 (-<br>1.72,0.64)            | -1.18 (-<br>2.40,0.05)                | -0.13 (-<br>1.14,0.89)            | -0.47 (-<br>1.26,0.32)                | -0.63 (-<br>1.61,0.35)                | -0.29 (-<br>1.38,0.81)            | <b>-1.07 (-</b><br><b>2.14,-0.00)</b> | 0.28 (-<br>0.52,1.09)                 | -0.31 (-<br>1.56,0.94) | -0.26 (-<br>1.49,0.97) | BT                     |

Results are presented as standardised mean differences (SMD) and 95% confidence intervals. BT: behavioural therapy, CBT: cognitive behavioural therapy, CBT+PC: cognitive behavioural therapy delivered with physiotherapy care, CP: combined psychological approaches, CP+PC: combined psychological approaches delivered with physiotherapy care, PC: physiotherapy care, PE: pain education, PE+PC: pain education delivered with physiotherapy care. Estimates in bold denote significance at  $p < 0.05$ . SMD values less than 0.00 favour the column-defining treatment node for the NMA results (lower left triangle) and the row-defining treatment nodes for the pairwise meta-analysis results (upper right triangle). Note: Three studies [5, 17, 92] were excluded from sensitivity analysis due to using ambiguous methods to score the Fear Avoidance Beliefs Questionnaire which were inconsistent with validated recommendations.

**Supplementary Table 22.4** Intervention compliance at post-intervention, excluding studies with high risk of bias

|                                   |                      |                      |                      |                       |                      |                      |                      |                     |                     |
|-----------------------------------|----------------------|----------------------|----------------------|-----------------------|----------------------|----------------------|----------------------|---------------------|---------------------|
| PC<br>(reference)                 | 0.77<br>(0.36,1.65)  | 0.40<br>(0.15,1.07)  | 0.43<br>(0.14,1.34)  |                       |                      | 0.97<br>(0.02,58.13) |                      |                     |                     |
| 0.73<br>(0.38,1.42)               | CBT+PC               | 0.81<br>(0.30,2.21)  |                      |                       |                      |                      |                      |                     |                     |
| 0.51<br>(0.23,1.10)               | 0.69<br>(0.31,1.53)  | CP+PC                |                      | 1.00<br>(0.02,60.74)  | 0.61<br>(0.22,1.72)  |                      |                      |                     |                     |
| 0.48<br>(0.17,1.33)               | 0.65<br>(0.20,2.16)  | 0.94<br>(0.27,3.20)  | PE+PC                |                       |                      |                      | 0.58<br>(0.09,3.87)  |                     |                     |
| 0.51<br>(0.01,33.16)              | 0.69<br>(0.01,45.36) | 1.00<br>(0.02,60.74) | 1.07<br>(0.01,77.54) | BT+PC                 |                      |                      |                      |                     |                     |
| <b>0.30</b><br><b>(0.10,0.94)</b> | 0.41<br>(0.13,1.34)  | 0.60<br>(0.24,1.52)  | 0.64<br>(0.16,2.52)  | 0.60<br>(0.01,40.39)  | CP                   | 0.33<br>(0.01,9.78)  | 1.57<br>(0.33,7.52)  |                     | 1.40<br>(0.28,6.95) |
| 0.26<br>(0.02,3.82)               | 0.35<br>(0.02,5.44)  | 0.51<br>(0.03,7.54)  | 0.54<br>(0.03,9.25)  | 0.51<br>(0.00,69.12)  | 0.85<br>(0.06,12.01) | PE                   |                      |                     |                     |
| 0.38<br>(0.09,1.64)               | 0.52<br>(0.11,2.40)  | 0.75<br>(0.18,3.15)  | 0.81<br>(0.19,3.41)  | 0.75<br>(0.01,58.38)  | 1.26<br>(0.34,4.61)  | 1.49<br>(0.08,26.82) | GP care              |                     |                     |
| 1.15<br>(0.29,4.63)               | 1.57<br>(0.34,7.32)  | 2.27<br>(0.46,11.15) | 2.42<br>(0.43,13.66) | 2.27<br>(0.03,185.82) | 3.79<br>(0.63,22.69) | 4.47<br>(0.22,92.77) | 3.01<br>(0.40,22.52) | Csl+PC              |                     |
| 0.43<br>(0.06,3.02)               | 0.58<br>(0.08,4.22)  | 0.84<br>(0.13,5.35)  | 0.89<br>(0.11,7.38)  | 0.84<br>(0.01,75.90)  | 1.40<br>(0.28,6.95)  | 1.65<br>(0.07,36.57) | 1.11<br>(0.14,8.74)  | 0.37<br>(0.03,4.08) | Usual care          |

Results are presented as odds ratios (OR) and 95% confidence intervals. BT+PC: behavioural therapy delivered with physiotherapy care, CBT+PC: cognitive behavioural therapy delivered with physiotherapy care, CP: combined psychological approaches, CP+PC: combined psychological approaches delivered with physiotherapy care, Csl+PC: counselling delivered with physiotherapy care, GP: general practitioner care, PC: physiotherapy care, PE: pain education, PE+PC: pain education delivered with physiotherapy care. Estimates in bold denote significance at  $p < 0.05$ . OR values less than 1.00 favour the column-defining treatment node for the NMA results (lower left triangle) and the row-defining treatment nodes for the pairwise meta-analysis results (upper right triangle).

**Supplementary Table 22.5** Intervention compliance at post-intervention, only including studies using intention-to-treatment analysis

|                      |                      |                      |                      |                     |                                   |                     |                      |                     |        |
|----------------------|----------------------|----------------------|----------------------|---------------------|-----------------------------------|---------------------|----------------------|---------------------|--------|
| PC<br>(reference)    | 0.80<br>(0.20,3.15)  |                      | 1.00<br>(0.15,6.56)  |                     | 1.03<br>(0.02,55.54)              |                     |                      | 1.32<br>(0.39,4.45) |        |
| 0.98<br>(0.30,3.17)  | PE+PC                |                      |                      |                     |                                   | 0.58<br>(0.11,3.06) |                      |                     |        |
| 1.05<br>(0.02,65.05) | 1.07<br>(0.02,72.85) | BT+PC                | 1.00<br>(0.02,54.49) |                     |                                   |                     |                      |                     |        |
| 1.05<br>(0.38,2.92)  | 1.07<br>(0.28,4.14)  | 1.00<br>(0.02,54.48) | CP+PC                | 0.60<br>(0.26,1.38) |                                   |                     |                      | 1.08<br>(0.41,2.83) |        |
| 0.57<br>(0.18,1.82)  | 0.59<br>(0.15,2.28)  | 0.55<br>(0.01,32.20) | 0.55<br>(0.25,1.20)  | CP                  | 3.06<br>(0.12,78.24)              | 1.57<br>(0.44,5.60) | 1.40<br>(0.41,4.83)  |                     |        |
| 1.30<br>(0.20,8.42)  | 1.33<br>(0.18,9.53)  | 1.24<br>(0.02,89.56) | 1.24<br>(0.27,5.72)  | 2.26<br>(0.56,9.21) | PE                                |                     | 0.41<br>(0.25,0.67)  |                     |        |
| 0.77<br>(0.19,3.03)  | 0.78<br>(0.21,2.90)  | 0.73<br>(0.01,47.83) | 0.73<br>(0.21,2.50)  | 1.33<br>(0.46,3.89) | 0.59<br>(0.10,3.36)               | GP care             |                      |                     |        |
| 0.58<br>(0.11,2.96)  | 0.59<br>(0.10,3.52)  | 0.55<br>(0.01,37.71) | 0.55<br>(0.14,2.17)  | 1.00<br>(0.31,3.28) | <b>0.44</b><br><b>(0.21,0.93)</b> | 0.75<br>(0.16,3.66) | Usual care           |                     |        |
| 1.23<br>(0.51,2.96)  | 1.25<br>(0.33,4.74)  | 1.17<br>(0.02,67.74) | 1.17<br>(0.58,2.35)  | 2.14<br>(0.79,5.77) | 0.94<br>(0.18,5.05)               | 1.61<br>(0.43,6.05) | 2.13<br>(0.47,9.59)  | CBT+PC              |        |
| 1.15<br>(0.41,3.22)  | 1.18<br>(0.25,5.58)  | 1.10<br>(0.02,77.18) | 1.10<br>(0.26,4.67)  | 2.01<br>(0.43,9.38) | 0.89<br>(0.11,7.47)               | 1.51<br>(0.27,8.39) | 2.00<br>(0.29,13.76) | 0.94<br>(0.24,3.62) | Csl+PC |

Results are presented as odds ratios (OR) and 95% confidence intervals. BT+PC: behavioural therapy delivered with physiotherapy care, CBT+PC: cognitive behavioural therapy delivered with physiotherapy care, CP: combined psychological approaches, CP+PC: combined psychological approaches delivered with physiotherapy care, Csl+PC: counselling delivered with physiotherapy care, GP care: general practitioner care, PE: pain education, PE+PC: pain education delivered with physiotherapy care, PC: physiotherapy care. Estimates in bold denote significance at  $p < 0.05$ . OR values less than 1.00 favour the column-defining treatment node for the NMA results (lower left triangle) and the row-defining treatment nodes for the pairwise meta-analysis results (upper right triangle).

**Supplementary Table 22.6** Intervention compliance at post-intervention, excluding studies published prior to year 2000

|                      |                      |                      |                      |                       |                      |                      |                      |                      |               |
|----------------------|----------------------|----------------------|----------------------|-----------------------|----------------------|----------------------|----------------------|----------------------|---------------|
| PC<br>(reference)    | 0.89<br>(0.35,2.30)  | 0.50<br>(0.13,1.91)  | 0.44<br>(0.13,1.44)  |                       |                      | 0.97<br>(0.02,61.83) |                      |                      |               |
| 0.81<br>(0.37,1.78)  | <b>CBT+PC</b>        | 0.93<br>(0.22,3.94)  |                      |                       |                      |                      |                      |                      |               |
| 0.58<br>(0.22,1.49)  | 0.71<br>(0.27,1.90)  | <b>CP+PC</b>         |                      | 1.00<br>(0.02,63.15)  | 0.61<br>(0.21,1.79)  |                      |                      |                      |               |
| 0.49<br>(0.17,1.42)  | 0.61<br>(0.16,2.25)  | 0.85<br>(0.22,3.29)  | <b>PE+PC</b>         |                       |                      |                      | 0.58<br>(0.08,4.24)  |                      |               |
| 0.58<br>(0.01,40.53) | 0.71<br>(0.01,50.47) | 1.00<br>(0.02,63.14) | 1.18<br>(0.02,92.33) | <b>BT+PC</b>          |                      |                      |                      |                      |               |
| 0.33<br>(0.09,1.13)  | 0.40<br>(0.11,1.49)  | 0.57<br>(0.21,1.51)  | 0.67<br>(0.15,2.92)  | 0.57<br>(0.01,40.07)  | <b>CP</b>            | 3.06<br>(0.10,94.70) | 1.57<br>(0.29,8.40)  | 1.40<br>(0.25,7.82)  |               |
| 0.64<br>(0.09,4.71)  | 0.79<br>(0.10,6.07)  | 1.11<br>(0.17,7.25)  | 1.31<br>(0.15,11.72) | 1.11<br>(0.01,105.06) | 1.96<br>(0.36,10.76) | <b>PE</b>            |                      | 0.41<br>(0.11,1.49)  |               |
| 0.40<br>(0.09,1.89)  | 0.50<br>(0.10,2.59)  | 0.70<br>(0.15,3.20)  | 0.82<br>(0.18,3.78)  | 0.70<br>(0.01,57.76)  | 1.23<br>(0.31,4.90)  | 0.63<br>(0.07,5.45)  | <b>GP care</b>       |                      |               |
| 0.32<br>(0.05,2.04)  | 0.40<br>(0.06,2.65)  | 0.56<br>(0.10,3.10)  | 0.65<br>(0.09,5.02)  | 0.56<br>(0.01,49.37)  | 0.98<br>(0.22,4.31)  | 0.50<br>(0.15,1.66)  | 0.80<br>(0.11,5.89)  | <b>Usual care</b>    |               |
| 1.15<br>(0.26,5.17)  | 1.43<br>(0.26,7.77)  | 2.00<br>(0.34,11.79) | 2.36<br>(0.37,14.86) | 2.00<br>(0.02,181.69) | 3.53<br>(0.50,24.69) | 1.80<br>(0.15,21.88) | 2.87<br>(0.33,24.80) | 3.60<br>(0.33,38.97) | <b>Csl+PC</b> |

Results are presented as odds ratios (OR) and 95% confidence intervals. BT+PC: behavioural therapy delivered with physiotherapy care, CBT+PC: cognitive behavioural therapy delivered with physiotherapy care, CP: combined psychological approaches, CP+PC: combined psychological approaches delivered with physiotherapy care, Csl+PC: counselling delivered with physiotherapy care, GP: general practitioner care, PC: physiotherapy care, PE: pain education, PE+PC: pain education delivered with physiotherapy care. Estimates in bold denote significance at  $p < 0.05$ . OR values less than 1.00 favour the column-defining treatment node for the NMA results (lower left triangle) and the row-defining treatment nodes for the pairwise meta-analysis results (upper right triangle).

**Supplementary Table 22.7** Intervention compliance at post-intervention, excluding studies of patients with leg pain

|                      |                      |                      |                      |                       |                      |                      |                      |                      |               |
|----------------------|----------------------|----------------------|----------------------|-----------------------|----------------------|----------------------|----------------------|----------------------|---------------|
| PC<br>(reference)    | 0.76<br>(0.28,2.07)  | 0.40<br>(0.14,1.18)  | 0.42<br>(0.12,1.45)  |                       |                      | 0.97<br>(0.02,63.19) |                      |                      |               |
| 0.70<br>(0.30,1.63)  | <b>CBT+PC</b>        | 0.80<br>(0.26,2.47)  |                      |                       |                      |                      |                      |                      |               |
| 0.47<br>(0.20,1.11)  | 0.66<br>(0.27,1.66)  | <b>CP+PC</b>         |                      | 1.00<br>(0.02,64.78)  | 0.90<br>(0.24,3.33)  |                      |                      |                      |               |
| 0.48<br>(0.16,1.49)  | 0.68<br>(0.17,2.74)  | 1.03<br>(0.26,4.01)  | <b>PE+PC</b>         |                       |                      |                      | 0.58<br>(0.07,4.45)  |                      |               |
| 0.47<br>(0.01,32.99) | 0.66<br>(0.01,47.49) | 1.00<br>(0.02,64.77) | 0.97<br>(0.01,77.96) | <b>BT+PC</b>          |                      |                      |                      |                      |               |
| 0.36<br>(0.10,1.36)  | 0.52<br>(0.13,2.12)  | 0.78<br>(0.24,2.49)  | 0.76<br>(0.16,3.55)  | 0.78<br>(0.01,59.20)  | <b>CP</b>            | 3.06<br>(0.10,97.62) | 1.57<br>(0.28,8.87)  | 0.71<br>(0.12,4.26)  |               |
| 0.68<br>(0.09,5.27)  | 0.97<br>(0.12,8.02)  | 1.46<br>(0.20,10.58) | 1.42<br>(0.15,13.38) | 1.46<br>(0.01,148.06) | 1.88<br>(0.32,10.85) | <b>PE</b>            |                      | 0.41<br>(0.10,1.63)  |               |
| 0.42<br>(0.08,2.14)  | 0.60<br>(0.11,3.44)  | 0.91<br>(0.18,4.58)  | 0.88<br>(0.18,4.27)  | 0.91<br>(0.01,79.63)  | 1.16<br>(0.28,4.91)  | 0.62<br>(0.07,5.71)  | <b>GP care</b>       |                      |               |
| 0.35<br>(0.05,2.38)  | 0.50<br>(0.07,3.65)  | 0.75<br>(0.12,4.73)  | 0.73<br>(0.09,5.97)  | 0.75<br>(0.01,71.60)  | 0.96<br>(0.21,4.43)  | 0.51<br>(0.14,1.81)  | 0.83<br>(0.10,6.52)  | <b>Usual care</b>    |               |
| 1.15<br>(0.24,5.54)  | 1.64<br>(0.28,9.74)  | 2.47<br>(0.41,14.85) | 2.40<br>(0.35,16.61) | 2.47<br>(0.03,231.73) | 3.17<br>(0.41,24.67) | 1.69<br>(0.13,22.24) | 2.73<br>(0.29,26.01) | 3.30<br>(0.28,39.42) | <b>Csl+PC</b> |

Results are presented as odds ratios (OR) and 95% confidence intervals. BT+PC: behavioural therapy delivered with physiotherapy care, CBT+PC: cognitive behavioural therapy delivered with physiotherapy care, CBT+PC: combined psychological approaches delivered with physiotherapy care, CP: combined psychological approaches, Csl+PC: counselling delivered with physiotherapy care, GP care: general practitioner care, PC: physiotherapy care, PE: pain education, PE+PC: pain education delivered with physiotherapy care. Estimates in bold denote significance at  $p < 0.05$ . OR values less than 1.00 favour the column-defining treatment node for the NMA results (lower left triangle) and the row-defining treatment nodes for the pairwise meta-analysis results (upper right triangle).

**Supplementary W. Assessment of global inconsistency for fear avoidance and intervention compliance**

**Supplementary Table 23.** Results of global inconsistency tests for fear avoidance and intervention compliance

| <b>Time-point</b>                   | <b>Fear avoidance</b>                                                    | <b>Intervention compliance</b> |
|-------------------------------------|--------------------------------------------------------------------------|--------------------------------|
| Post-intervention                   | $\chi^2 = 0.77, p = 0.99$                                                | $\chi^2 = 1.97, p = 0.92$      |
| Short-term Treatment Sustainability | $\chi^2 = 0.59, p = 0.44$                                                | NMA not performed              |
| Mid-term Treatment Sustainability   | No inconsistency detected due to absence of closed loops in the network. | NMA not performed              |
| Long-term Treatment Sustainability  | NMA not performed                                                        | NMA not performed              |

NMA: network meta-analysis. Estimates in bold denote significance at  $p < 0.05$ .



**Supplementary X. Results of side-splitting method for fear avoidance and intervention compliance**

**Supplementary Table 24.1** Fear avoidance at post-intervention

| Side  | Direct Coef. | SE   | Indirect Coef. | SE     | <i>p</i> |
|-------|--------------|------|----------------|--------|----------|
| 02 03 | .            | .    | .              | .      | .        |
| 02 07 | 0.14         | 1.36 | -1.37          | 1.20   | 0.40     |
| 02 08 | -1.31        | 1.39 | -1.02          | 1.85   | 0.90     |
| 01 02 | 1.93         | 0.62 | 0.52           | 1.77   | 0.45     |
| 01 07 | 0.33         | 1.35 | 1.73           | 1.30   | 0.45     |
| 04 05 | -0.13        | 1.37 | -1.23          | 2.19   | 0.67     |
| 04 08 | -1.25        | 1.39 | -0.16          | 2.17   | 0.67     |
| 04 11 | -0.18        | 1.32 | 0.54           | 632.08 | 1.00     |
| 05 06 | 0.06         | 1.38 | -0.68          | 1.82   | 0.74     |
| 05 09 | 0.84         | 0.80 | -0.12          | 2.99   | 0.76     |
| 05 10 | 0.51         | 0.98 | -0.55          | 3.09   | 0.75     |
| 06 07 | 0.15         | 0.98 | 0.44           | 2.10   | 0.90     |
| 06 08 | 0.13         | 1.38 | -0.78          | 1.50   | 0.66     |
| 06 09 | 0.79         | 1.39 | 1.44           | 2.12   | 0.80     |
| 06 12 | 0.37         | 1.32 | 1.84           | 632.20 | 1.00     |
| 09 10 | -0.53        | 1.40 | -0.15          | 1.65   | 0.86     |

01: cognitive behavioural therapy delivered with physiotherapy care, 02: physiotherapy care, 03: combined psychological approaches delivered with physiotherapy care, 04: pain education delivered with physiotherapy care, 05: advice, 06: cognitive behavioural therapy, 07: combined psychological approaches, 08: pain education, 09: no intervention, 10: behavioural therapy, 11: mindfulness, 12: usual care. Direct Coef.: direct coefficient, SE: standard error, Indirect Coef.: indirect coefficient. Estimates in bold denote significance at  $p < 0.05$ .

**Supplementary Table 24.2** Fear avoidance at short-term treatment sustainability

| Side | Direct Coef. | SE   | Indirect Coef. | SE     | <i>p</i> |
|------|--------------|------|----------------|--------|----------|
| 2 3  | -1.34        | 0.49 | 0.14           | 182.35 | 0.99     |
| 2 4  | -0.14        | 0.51 | 0.50           | 0.67   | 0.44     |
| 2 7  | 0.20         | 0.48 | -0.44          | 0.69   | 0.44     |
| 1 2  | .            | .    | .              | .      | .        |
| 3 5  | -0.36        | 0.46 | 1.28           | 210.37 | 0.99     |
| 4 7  | -0.30        | 0.46 | 0.35           | 0.70   | 0.44     |
| 5 6  | 0.53         | 0.44 | 3.40           | 637.31 | 1.00     |
| 5 8  | 0.42         | 0.44 | 3.40           | 620.87 | 1.00     |

01: pain education delivered with physiotherapy care, 02: physiotherapy care, 03: pain education, 04: combined psychological approaches delivered with physiotherapy care, 05: combined psychological approaches, 06: general practitioner care, 07: cognitive behavioural therapy delivered with physiotherapy care, 08: usual care. Direct Coef.: direct coefficient, SE: standard error, Indirect Coef.: indirect coefficient. Estimates in bold denote significance at  $p < 0.05$ .

**Supplementary Table 24.3** Fear avoidance at mid-term treatment sustainability

| Side  | Direct Coef. | SE   | Indirect Coef. | SE     | <i>p</i> |
|-------|--------------|------|----------------|--------|----------|
| 04 05 | .            | .    | .              | .      | .        |
| 04 12 | .            | .    | .              | .      | .        |
| 01 02 | 0.00         | 0.40 | -0.49          | 632.44 | 1.00     |
| 02 06 | 0.27         | 0.41 | 0.18           | 153.77 | 1.00     |
| 02 09 | 0.51         | 0.38 | 0.38           | 282.34 | 1.00     |
| 02 10 | 0.07         | 0.43 | 0.49           | 632.38 | 1.00     |
| 03 04 | 0.50         | 0.29 | 0.45           | 99.76  | 1.00     |
| 03 07 | 0.32         | 0.40 | 0.35           | 103.60 | 1.00     |
| 06 07 | -0.20        | 0.40 | -0.21          | 110.21 | 1.00     |
| 06 11 | 0.14         | 0.28 | -0.04          | 432.16 | 1.00     |
| 06 13 | 0.32         | 0.39 | -0.05          | 615.50 | 1.00     |
| 08 09 | 0.13         | 0.39 | 0.54           | 630.64 | 1.00     |

01: advice, 02: cognitive behavioural therapy, 03: cognitive behavioural therapy delivered with physiotherapy care, 04: physiotherapy care, 05: pain education, 06: combined psychological approaches, 07: combined psychological approaches delivered with physiotherapy care, 08: counselling, 09: no intervention, 10: behavioural therapy, 11: general practitioner care, 12: pain education delivered with physiotherapy care, 13: usual care. Direct Coef.: direct coefficient, SE: standard error, Indirect Coef.: indirect coefficient. Estimates in bold denote significance at  $p < 0.05$ .

**Comment.** Fear avoidance at long-term treatment sustainability

NMA was not performed at long-term treatment sustainability for fear avoidance as the network became disconnected.

**Supplementary Table 24.4** Intervention compliance at post-intervention

| Side  | Direct Coef. | SE   | Indirect Coef. | SE      | <i>p</i> |
|-------|--------------|------|----------------|---------|----------|
| 02 03 | 0.92         | 0.5  | 0.35           | 0.64    | 0.49     |
| 02 04 | 0.85         | 0.58 | 0.12           | 1.4     | 0.63     |
| 02 07 | -0.03        | 2.09 | 0.68           | 1.1     | 0.77     |
| 02 10 | .            | .    | .              | .       | .        |
| 01 02 | -0.26        | 0.38 | -0.65          | 0.87    | 0.69     |
| 01 03 | 0.2          | 0.49 | 0.75           | 0.71    | 0.53     |
| 03 05 | 0            | 2.09 | -1.43          | 4177.09 | 1.00     |
| 03 06 | 0.5          | 0.52 | 0.84           | 1.28    | 0.80     |
| 04 08 | 0.55         | 0.97 | -0.18          | 1.17    | 0.63     |
| 06 07 | 1.12         | 1.72 | -1.24          | 0.89    | 0.22     |
| 06 08 | -0.45        | 0.79 | 0.28           | 1.3     | 0.63     |
| 06 09 | -0.34        | 0.82 | 1.05           | 1.47    | 0.41     |
| 07 09 | 0.89         | 0.57 | -0.5           | 1.58    | 0.41     |

01: cognitive behavioural therapy delivered with physiotherapy care, 02: physiotherapy care, 03: combined psychological approaches delivered with physiotherapy care, 04: pain education delivered with physiotherapy care, 05: behavioural therapy delivered with physiotherapy care, 06: combined psychological approaches, 07: pain education, 08: general practitioner care, 09: usual care, 10: counselling delivered with physiotherapy care. Direct Coef.: direct coefficient, SE: standard error, Indirect Coef.: indirect coefficient. Estimates in bold denote significance at  $p < 0.05$ .

## Supplementary Y. Results of meta-regression for primary and secondary outcomes

**Supplementary Table 25.** Results of meta-regression for physical function

| Pairwise comparisons for physical function | Post-intervention |          | Short-term follow-up |             | Mid-term follow-up |                 | Long-term follow-up |             |
|--------------------------------------------|-------------------|----------|----------------------|-------------|--------------------|-----------------|---------------------|-------------|
|                                            | Coef. (SE)        | <i>p</i> | Coef. (SE)           | <i>p</i>    | Coef. (SE)         | <i>p</i>        | Coef. (SE)          | <i>p</i>    |
| PC vs. CBT                                 |                   |          |                      |             |                    |                 |                     |             |
| - Mean age                                 | 0.00 (0.14)       | 0.99     | -0.01 (5.69)         | 1.00        | 0.08 (0.06)        | 0.16            | 0.08 (5.26)         | 1.00        |
| - Percentage of males                      | 0.00 (0.06)       | 0.97     | -0.01 (5.74)         | 1.00        | 0.00 (0.02)        | 0.94            | 0.02 (2.28)         | 1.00        |
| - Sample size                              | 0.00 (0.01)       | 0.79     | 0.00 (0.09)          | 1.00        | 0.01 (0.01)        | 0.33            | 0.01 (0.51)         | 1.00        |
| - Baseline level of physical function      | -0.02 (0.04)      | 0.72     | 0.01 (5.27)          | 1.00        | -0.03 (0.03)       | 0.32            | -0.09 (2.51)        | 0.97        |
| PC vs CBT+PC                               |                   |          |                      |             |                    |                 |                     |             |
| - Mean age                                 | -0.10 (0.06)      | 0.08     | 0.00 (0.05)          | 0.96        | -0.01 (0.03)       | 0.65            | -0.26 (0.08)        | <b>0.01</b> |
| - Percentage of males                      | 0.02 (0.04)       | 0.63     | 0.03 (0.02)          | 0.23        | 0.01 (0.01)        | 0.54            | 0.27 (0.10)         | <b>0.01</b> |
| - Sample size                              | 0.00 (0.00)       | 0.43     | 0.00 (0.00)          | 0.97        | 0.00 (0.00)        | 0.58            | 0.01 (0.03)         | 0.71        |
| - Baseline level of physical function      | -0.03 (0.02)      | 0.23     | 0.01 (0.05)          | 0.75        | 0.02 (0.01)        | <b>0.02</b>     | -0.03 (0.05)        | 0.56        |
| PC vs. BT                                  |                   |          |                      |             |                    |                 |                     |             |
| - Mean age                                 | -0.20 (0.37)      | 0.59     | N/A                  | N/A         | N/A                | N/A             | N/A                 | N/A         |
| - Percentage of males                      | 0.00 (0.08)       | 0.99     | N/A                  | N/A         | N/A                | N/A             | N/A                 | N/A         |
| - Sample size                              | 0.00 (0.01)       | 0.86     | N/A                  | N/A         | N/A                | N/A             | N/A                 | N/A         |
| - Baseline level of physical function      | -0.01 (0.05)      | 0.78     | N/A                  | N/A         | N/A                | N/A             | N/A                 | N/A         |
| PC vs. BT+PC                               |                   |          |                      |             |                    |                 |                     |             |
| - Mean age                                 | N/A               | N/A      | N/A                  | N/A         | N/A                | N/A             | N/A                 | N/A         |
| - Percentage of males                      | N/A               | N/A      | N/A                  | N/A         | N/A                | N/A             | N/A                 | N/A         |
| - Sample size                              | N/A               | N/A      | N/A                  | N/A         | N/A                | N/A             | N/A                 | N/A         |
| - Baseline level of physical function      | N/A               | N/A      | N/A                  | N/A         | N/A                | N/A             | N/A                 | N/A         |
| PC vs. Mindfulness                         |                   |          |                      |             |                    |                 |                     |             |
| - Mean age                                 | -0.32 (0.50)      | 0.52     | N/A                  | N/A         | -0.01 (1.26)       | 1.00            | N/A                 | N/A         |
| - Percentage of males                      | 0.00 (0.07)       | 0.96     | N/A                  | N/A         | 0.01 (0.03)        | 0.72            | N/A                 | N/A         |
| - Sample size                              | 0.01 (0.03)       | 0.71     | N/A                  | N/A         | 0.02 (0.02)        | 0.20            | N/A                 | N/A         |
| - Baseline level of physical function      | 0.03 (0.09)       | 0.71     | N/A                  | N/A         | 0.01 (0.04)        | 0.72            | N/A                 | N/A         |
| PC vs. Mindfulness+PC                      |                   |          |                      |             |                    |                 |                     |             |
| - Mean age                                 | 0.00 (0.34)       | 1.00     | N/A                  | N/A         | 0.22 (0.29)        | 0.44            | N/A                 | N/A         |
| - Percentage of males                      | 0.00 (0.28)       | 0.99     | N/A                  | N/A         | -0.06 (0.07)       | 0.40            | N/A                 | N/A         |
| - Sample size                              | 0.00 (0.01)       | 0.98     | N/A                  | N/A         | 0.00 (0.00)        | 0.52            | N/A                 | N/A         |
| - Baseline level of physical function      | 0.01 (0.07)       | 0.83     | N/A                  | N/A         | -0.09 (0.10)       | 0.41            | N/A                 | N/A         |
| PC vs. PE                                  |                   |          |                      |             |                    |                 |                     |             |
| - Mean age                                 | -0.06 (0.16)      | 0.70     | 0.27 (0.19)          | 0.17        | 0.61 (0.19)        | <b>&lt;0.01</b> | N/A                 | N/A         |
| - Percentage of males                      | 0.01 (0.05)       | 0.80     | -0.08 (0.04)         | <b>0.03</b> | -0.09 (0.03)       | <b>&lt;0.01</b> | N/A                 | N/A         |
| - Sample size                              | 0.00 (0.00)       | 0.97     | 0.00 (0.00)          | 0.31        | 0.00 (0.00)        | <b>0.03</b>     | N/A                 | N/A         |
| - Baseline level of physical function      | 0.01 (0.03)       | 0.79     | -0.01 (0.05)         | 0.85        | -0.10 (0.03)       | <b>&lt;0.01</b> | N/A                 | N/A         |
| PC vs. PE+PC                               |                   |          |                      |             |                    |                 |                     |             |
| - Mean age                                 | 0.02 (0.10)       | 0.81     | 0.05 (0.07)          | 0.48        | N/A                | N/A             | N/A                 | N/A         |
| - Percentage of males                      | 0.01 (0.04)       | 0.79     | -0.02 (0.02)         | 0.26        | N/A                | N/A             | N/A                 | N/A         |
| - Sample size                              | -0.01 (0.01)      | 0.58     | -0.01 (0.01)         | 0.19        | N/A                | N/A             | N/A                 | N/A         |
| - Baseline level of physical function      | 0.00 (0.03)       | 0.91     | 0.02 (0.04)          | 0.61        | N/A                | N/A             | N/A                 | N/A         |
| PC vs. Csl                                 |                   |          |                      |             |                    |                 |                     |             |
| - Mean age                                 | N/A               | N/A      | N/A                  | N/A         | N/A                | N/A             | N/A                 | N/A         |
| - Percentage of males                      | N/A               | N/A      | N/A                  | N/A         | N/A                | N/A             | N/A                 | N/A         |
| - Sample size                              | N/A               | N/A      | N/A                  | N/A         | N/A                | N/A             | N/A                 | N/A         |
| - Baseline level of physical function      | N/A               | N/A      | N/A                  | N/A         | N/A                | N/A             | N/A                 | N/A         |
| PC vs. Csl+PC                              |                   |          |                      |             |                    |                 |                     |             |
| - Mean age                                 | -0.42 (0.33)      | 0.20     | N/A                  | N/A         | N/A                | N/A             | N/A                 | N/A         |
| - Percentage of males                      | -0.08 (0.07)      | 0.27     | N/A                  | N/A         | N/A                | N/A             | N/A                 | N/A         |
| - Sample size                              | 0.21 (0.16)       | 0.18     | N/A                  | N/A         | N/A                | N/A             | N/A                 | N/A         |
| - Baseline level of physical function      | 0.39 (0.29)       | 0.19     | N/A                  | N/A         | N/A                | N/A             | N/A                 | N/A         |
| PC vs. CP                                  |                   |          |                      |             |                    |                 |                     |             |
| - Mean age                                 | -0.11 (0.12)      | 0.36     | 0.17 (0.32)          | 0.57        | 0.00 (0.07)        | 0.99            | 0.07 (11.22)        | 1.00        |

|                                       |              |      |              |      |               |      |               |      |
|---------------------------------------|--------------|------|--------------|------|---------------|------|---------------|------|
| - Percentage of males                 | 0.06 (0.04)  | 0.14 | -0.04 (0.04) | 0.23 | -0.01 (0.02)  | 0.81 | 0.01 (2.14)   | 1.00 |
| - Sample size                         | 0.00 (0.01)  | 0.72 | 0.01 (0.01)  | 0.34 | 0.01 (0.01)   | 0.37 | 0.00 (0.29)   | 1.00 |
| - Baseline level of physical function | 0.00 (0.05)  | 0.96 | -0.03 (0.06) | 0.60 | -0.03 (0.02)  | 0.10 | 0.01 (2.20)   | 1.00 |
| PC vs. CP+PC                          |              |      |              |      |               |      |               |      |
| - Mean age                            | -0.09 (0.08) | 0.26 | 0.06 (0.08)  | 0.45 | 0.07 (0.04)   | 0.09 |               | N/A  |
| - Percentage of males                 | 0.02 (0.04)  | 0.56 | -0.01 (0.02) | 0.57 | -0.03 (0.02)  | 0.09 | N/A           | N/A  |
| - Sample size                         | 0.00 (0.00)  | 0.65 | 0.00 (0.00)  | 0.80 | 0.00 (0.00)   | 0.74 | N/A           | N/A  |
| - Baseline level of physical function | 0.01 (0.04)  | 0.90 | 0.02 (0.03)  | 0.56 | -0.01 (0.01)  | 0.21 | N/A           | N/A  |
| PC vs. Advice                         |              |      |              |      |               |      |               |      |
| - Mean age                            | -0.28 (0.42) | 0.51 | N/A          | N/A  | 0.00 (1.12)   | 1.00 | N/A           | N/A  |
| - Percentage of males                 | 0.03 (0.12)  | 0.78 | N/A          | N/A  | -0.05 (0.09)  | 0.60 | N/A           | N/A  |
| - Sample size                         | 0.00 (0.01)  | 0.82 | 0.00 (0.43)  | 1.00 | 0.00 (0.01)   | 0.75 | N/A           | N/A  |
| - Baseline level of physical function | 0.01 (0.04)  | 0.70 | 0.02 (1.79)  | 0.99 | 0.01 (0.02)   | 0.56 | N/A           | N/A  |
| PC vs. Usual care                     |              |      |              |      |               |      |               |      |
| - Mean age                            | -0.08 (0.18) | 0.65 | 0.21 (0.31)  | 0.48 | -0.03 (0.08)  | 0.71 | 0.02 (9.45)   | 1.00 |
| - Percentage of males                 | 0.00 (0.05)  | 0.98 | -0.06 (0.04) | 0.15 | 0.00 (0.02)   | 0.92 | N/A           | N/A  |
| - Sample size                         | 0.00 (0.01)  | 0.72 | 0.01 (0.01)  | 0.28 | 0.01 (0.01)   | 0.47 | 0.00 (0.12)   | 1.00 |
| - Baseline level of physical function | 0.00 (0.05)  | 0.92 | -0.03 (0.06) | 0.54 | -0.02 (0.02)  | 0.23 | 0.02 (2.21)   | 0.99 |
| PC vs. GP care                        |              |      |              |      |               |      |               |      |
| - Mean age                            | -0.09 (0.17) | 0.59 | 0.24 (0.37)  | 0.50 | -0.10 (0.11)  | 0.32 | -0.13 (23.45) | 1.00 |
| - Percentage of males                 | 0.02 (0.05)  | 0.70 | -0.03 (0.04) | 0.38 | -0.02 (0.02)  | 0.41 | -0.01 (2.13)  | 1.00 |
| - Sample size                         | 0.00 (0.01)  | 0.96 | 0.01 (0.02)  | 0.54 | 0.00 (0.01)   | 0.76 | -0.01 (1.00)  | 1.00 |
| - Baseline level of physical function | 0.08 (0.34)  | 0.80 | -0.07 (0.13) | 0.60 | 0.01 (0.04)   | 0.85 | -0.10 (12.00) | 0.99 |
| PC vs. No intervention                |              |      |              |      |               |      |               |      |
| - Mean age                            | 0.04 (0.17)  | 0.83 | 0.23 (1.42)  | 0.99 | 0.33 (13.71)  | 0.99 | 0.08 (14.99)  | 1.00 |
| - Percentage of males                 | -0.01 (0.07) | 0.88 | -0.04 (1.29) | 0.98 | 0.00 (0.67)   | 1.00 | 0.00 (0.77)   | 1.00 |
| - Sample size                         | 0.00 (0.01)  | 0.78 | 0.00 (0.06)  | 1.00 | 0.01 (0.07)   | 0.99 | 0.00 (0.32)   | 1.00 |
| - Baseline level of physical function | -0.05 (0.06) | 0.37 | -0.04 (6.89) | 1.00 | -0.28 (18.04) | 0.99 | -0.01 (2.22)  | 1.00 |

BT: behavioural therapy, BT+PC: behavioural therapy delivered with physiotherapy care, CBT: cognitive behavioural therapy, CBT+PC: cognitive behavioural therapy delivered with physiotherapy care, Coef.: coefficient, CP: combined psychological approaches, CP+PC: combined psychological approaches delivered with physiotherapy care, Csl: counselling, Csl+PC: counselling delivered with physiotherapy care, GP care: general practitioner care, Mindfulness+PC: mindfulness delivered with physiotherapy care, PC: physiotherapy care, PE: pain education, PE+PC: pain education delivered with physiotherapy care. SE: standard error, vs.: versus (i.e., compared with). Estimates in bold denote significance at  $p < 0.05$ .

#### Interpretation:

A small number of meta-regression results for comparisons between PC and psychological interventions, delivered with or without PC as a co-intervention (e.g., CBT+PC vs PC and PE vs PC, respectively), demonstrated significance at  $p < 0.05$ . However, for these comparisons, results were only significant at  $p < 0.05$  at one (majority) to two time points, per potential effect modifier (i.e., results were not consistent across follow-up time points for a given comparison). From a clinical perspective, it is unlikely that a covariate only modifies the effect of treatment at one or two time points, out of four time points in total. Thus, these findings are likely due to type I error.

#### Conclusion:

We did not find any evidence suggesting that mean age, proportion of males, study sample size, or mean baseline levels of physical function, were effect modifiers.

**Supplementary Table 26.** Results of meta-regression for pain intensity

| Pairwise comparisons for pain intensity | Post-intervention |                 | Short-term follow-up |                 | Mid-term follow-up |             | Long-term follow-up |                 |
|-----------------------------------------|-------------------|-----------------|----------------------|-----------------|--------------------|-------------|---------------------|-----------------|
|                                         | Coef. (SE)        | <i>p</i>        | Coef. (SE)           | <i>p</i>        | Coef. (SE)         | <i>p</i>    | Coef. (SE)          | <i>p</i>        |
| PC vs CBT                               |                   |                 |                      |                 |                    |             |                     |                 |
| - Mean age                              | -0.21 (0.09)      | <b>0.02</b>     | -0.13 (0.10)         | 0.20            | -0.02 (0.06)       | 0.75        | 0.07 (5.32)         | 1.00            |
| - Percentage of males                   | 0.08 (0.03)       | <b>0.01</b>     | 0.07 (0.05)          | 0.18            | 0.00 (0.04)        | 0.97        | 0.00 (2.28)         | 1.00            |
| - Sample size                           | 0.00 (0.01)       | 0.99            | -0.02 (0.01)         | 0.15            | 0.00 (0.01)        | 0.55        | 0.01 (0.50)         | 1.00            |
| - Baseline level of pain intensity      | -0.06 (0.02)      | <b>0.01</b>     | 0.03 (0.07)          | 0.68            | 0.01 (0.06)        | 0.87        | 0.08 (252.91)       | 1.00            |
| PC vs CBT+PC                            |                   |                 |                      |                 |                    |             |                     |                 |
| - Mean age                              | -0.10 (0.05)      | <b>0.04</b>     | 0.47 (0.13)          | <b>&lt;0.01</b> | -0.07 (0.03)       | <b>0.02</b> | -0.19 (0.16)        | 0.24            |
| - Percentage of males                   | 0.09 (0.04)       | <b>0.02</b>     | 0.03 (0.06)          | 0.59            | -0.01 (0.02)       | 0.76        | 0.19 (0.14)         | 0.16            |
| - Sample size                           | 0.00 (0.01)       | 0.92            | 0.01 (0.01)          | 0.46            | 0.00 (0.00)        | 0.97        | 0.01 (0.02)         | 0.47            |
| - Baseline level of pain intensity      | -0.11 (0.03)      | <b>&lt;0.01</b> | -0.07 (0.10)         | 0.49            | -0.03 (0.04)       | 0.41        | -0.17 (0.04)        | <b>&lt;0.01</b> |
| PC vs. BT                               |                   |                 |                      |                 |                    |             |                     |                 |
| - Mean age                              | -0.09 (0.08)      | 0.23            | -0.04 (0.03)         | 0.26            | 0.00 (0.12)        | 0.97        | N/A                 | N/A             |
| - Percentage of males                   | 0.07 (0.03)       | <b>0.03</b>     | 0.03 (0.04)          | 0.50            | 0.01 (0.05)        | 0.87        | N/A                 | N/A             |
| - Sample size                           | 0.00 (0.01)       | 0.86            | 0.00 (0.01)          | 0.67            | 0.00 (0.02)        | 0.82        | N/A                 | N/A             |
| - Baseline level of pain intensity      | -0.05 (0.02)      | <b>0.01</b>     | -0.02 (0.03)         | 0.38            | 0.01 (0.06)        | 0.91        | N/A                 | N/A             |
| PC vs. BT+PC                            |                   |                 |                      |                 |                    |             |                     |                 |
| - Mean age                              | 0.07 (0.11)       | 0.50            | N/A                  | N/A             | 0.06 (0.18)        | 0.74        | -0.03 (0.84)        | 0.98            |
| - Percentage of males                   | -0.02 (0.05)      | 0.63            | N/A                  | N/A             | 0.09 (0.15)        | 0.55        | 0.05 (0.58)         | 0.94            |
| - Sample size                           | 0.02 (0.03)       | 0.54            | N/A                  | N/A             | 0.01 (0.02)        | 0.41        | 0.02 (0.07)         | 0.73            |
| - Baseline level of pain intensity      | -0.01 (0.02)      | 0.76            | N/A                  | N/A             | -0.07 (0.08)       | 0.37        | -0.18 (0.06)        | <b>&lt;0.01</b> |
| PC vs. Mindfulness                      |                   |                 |                      |                 |                    |             |                     |                 |
| - Mean age                              | -0.32 (0.14)      | <b>0.02</b>     | N/A                  | N/A             | 0.00 (8.76)        | 1.00        | N/A                 | N/A             |
| - Percentage of males                   | 0.07 (0.04)       | 0.10            | N/A                  | N/A             | 0.01 (0.05)        | 0.80        | N/A                 | N/A             |
| - Sample size                           | 0.00 (0.01)       | 0.79            | N/A                  | N/A             | 0.00 (0.02)        | 0.93        | N/A                 | N/A             |
| - Baseline level of pain intensity      | -0.07 (0.09)      | 0.41            | N/A                  | N/A             | 0.03 (0.10)        | 0.75        | N/A                 | N/A             |
| PC vs. Mindfulness+PC                   |                   |                 |                      |                 |                    |             |                     |                 |
| - Mean age                              | 0.00 (0.07)       | 0.98            | -0.03 (0.03)         | 0.25            | 0.22 (0.28)        | 0.43        | N/A                 | N/A             |
| - Percentage of males                   | 0.00 (0.05)       | 0.97            | 0.02 (0.06)          | 0.75            | -0.06 (0.09)       | 0.49        | N/A                 | N/A             |
| - Sample size                           | -0.01 (0.02)      | 0.63            | 0.00 (0.01)          | 0.77            | 0.00 (0.00)        | 0.58        | N/A                 | N/A             |
| - Baseline level of pain intensity      | 0.02 (0.06)       | 0.71            | 0.06 (0.15)          | 0.70            | -0.02 (0.04)       | 0.53        | N/A                 | N/A             |
| PC vs. PE                               |                   |                 |                      |                 |                    |             |                     |                 |
| - Mean age                              | -0.15 (0.15)      | 0.31            | 0.14 (0.08)          | 0.08            | -1.05 (15.67)      | 0.95        | N/A                 | N/A             |
| - Percentage of males                   | 0.05 (0.05)       | 0.31            | -0.03 (0.09)         | 0.75            | -0.86 (21.79)      | 0.97        | N/A                 | N/A             |
| - Sample size                           | -0.01 (0.02)      | 0.61            | 0.20 (0.07)          | <b>&lt;0.01</b> | 0.10 (2.43)        | 1.00        | N/A                 | N/A             |
| - Baseline level of pain intensity      | 0.20 (0.24)       | 0.39            | 0.16 (0.33)          | 0.63            | -0.22 (5.39)       | 0.97        | N/A                 | N/A             |
| PC vs. PE+PC                            |                   |                 |                      |                 |                    |             |                     |                 |
| - Mean age                              | 0.02 (0.04)       | 0.62            | 0.07 (0.04)          | 0.07            | -0.49 (4.91)       | 0.92        | N/A                 | N/A             |
| - Percentage of males                   | 0.01 (0.03)       | 0.68            | 0.01 (0.04)          | 0.78            | 0.00 (5.07)        | 1.00        | N/A                 | N/A             |
| - Sample size                           | 0.00 (0.01)       | 0.99            | 0.00 (0.01)          | 0.68            | 0.00 (0.27)        | 1.00        | N/A                 | N/A             |
| - Baseline level of pain intensity      | -0.03 (0.02)      | <b>0.04</b>     | -0.04 (0.03)         | 0.15            | 0.00 (9.11)        | 1.00        | N/A                 | N/A             |
| PC vs. Csl                              |                   |                 |                      |                 |                    |             |                     |                 |
| - Mean age                              | N/A               | N/A             | N/A                  | N/A             | N/A                | N/A         | N/A                 | N/A             |
| - Percentage of males                   | N/A               | N/A             | N/A                  | N/A             | N/A                | N/A         | N/A                 | N/A             |
| - Sample size                           | N/A               | N/A             | N/A                  | N/A             | N/A                | N/A         | N/A                 | N/A             |
| - Baseline level of pain intensity      | N/A               | N/A             | N/A                  | N/A             | N/A                | N/A         | N/A                 | N/A             |
| PC vs. Csl+PC                           |                   |                 |                      |                 |                    |             |                     |                 |
| - Mean age                              | N/A               | N/A             | N/A                  | N/A             | N/A                | N/A         | N/A                 | N/A             |
| - Percentage of males                   | N/A               | N/A             | N/A                  | N/A             | N/A                | N/A         | N/A                 | N/A             |
| - Sample size                           | N/A               | N/A             | N/A                  | N/A             | N/A                | N/A         | N/A                 | N/A             |
| - Baseline level of pain intensity      | N/A               | N/A             | N/A                  | N/A             | N/A                | N/A         | N/A                 | N/A             |
| PC vs. CP                               |                   |                 |                      |                 |                    |             |                     |                 |
| - Mean age                              | -0.19 (0.13)      | 0.13            | -0.28 (0.08)         | <b>&lt;0.01</b> | -0.14 (0.20)       | 0.49        | -0.14 (12.11)       | 1.00            |
| - Percentage of males                   | 0.06 (0.03)       | 0.08            | 0.03 (0.07)          | 0.66            | 0.02 (0.04)        | 0.62        | -0.03 (2.44)        | 1.00            |
| - Sample size                           | 0.00 (0.01)       | 0.93            | -0.03 (0.01)         | <b>0.01</b>     | 0.00 (0.01)        | 0.64        | -0.01 (1.04)        | 1.00            |

|                                    |              |                 |              |                 |               |      |               |      |
|------------------------------------|--------------|-----------------|--------------|-----------------|---------------|------|---------------|------|
| - Baseline level of pain intensity | -0.02 (0.04) | 0.53            | -0.05 (0.05) | 0.30            | -0.03 (0.05)  | 0.62 | -0.05 (3.91)  | 0.99 |
| PC vs. CP+PC                       |              |                 |              |                 |               |      |               |      |
| - Mean age                         | -0.16 (0.10) | 0.11            | -0.03 (0.03) | 0.40            | 0.03 (0.04)   | 0.47 | -0.28 (0.74)  | 0.70 |
| - Percentage of males              | 0.06 (0.03)  | 0.08            | 0.01 (0.05)  | 0.77            | -0.04 (0.03)  | 0.15 | -0.16 (0.40)  | 0.69 |
| - Sample size                      | 0.00 (0.00)  | 0.98            | 0.00 (0.01)  | 0.82            | 0.00 (0.00)   | 0.65 | 0.00 (0.01)   | 0.73 |
| - Baseline level of pain intensity | -0.01 (0.03) | 0.66            | 0.00 (0.04)  | 0.95            | 0.06 (0.07)   | 0.40 | 0.19 (0.19)   | 0.32 |
| PC vs. Advice                      |              |                 |              |                 |               |      |               |      |
| - Mean age                         | -0.30 (0.11) | <b>0.01</b>     | -0.19 (0.08) | <b>0.02</b>     | 0.01 (7.78)   | 1.00 | N/A           | N/A  |
| - Percentage of males              | 0.09 (0.09)  | 0.31            | 0.04 (0.08)  | 0.60            | -0.09 (0.15)  | 0.57 | N/A           | N/A  |
| - Sample size                      | 0.00 (0.01)  | 0.92            | -0.02 (0.01) | 0.09            | -0.01 (0.01)  | 0.58 | N/A           | N/A  |
| - Baseline level of pain intensity | -0.06 (0.05) | 0.19            | -0.04 (0.09) | 0.66            | -0.03 (0.06)  | 0.58 | N/A           | N/A  |
| PC vs. Usual care                  |              |                 |              |                 |               |      |               |      |
| - Mean age                         | -0.24 (0.17) | 0.16            | -0.24 (0.08) | <b>&lt;0.01</b> | -0.11 (0.21)  | 0.60 | -0.01 (10.59) | 1.00 |
| - Percentage of males              | 0.06 (0.04)  | 0.15            | 0.01 (0.09)  | 0.91            | 0.00 (0.03)   | 0.92 | N/A           | N/A  |
| - Sample size                      | 0.00 (0.01)  | 0.87            | -0.03 (0.01) | 0.05            | 0.00 (0.01)   | 0.82 | 0.00 (0.13)   | 1.00 |
| - Baseline level of pain intensity | -0.03 (0.04) | 0.39            | -0.05 (0.05) | 0.32            | -0.03 (0.05)  | 0.61 | N/A           | N/A  |
| PC vs. GP care                     |              |                 |              |                 |               |      |               |      |
| - Mean age                         | -0.13 (0.16) | 0.44            | -0.02 (0.10) | 0.82            | 0.15 (0.22)   | 0.48 | 0.26 (24.11)  | 1.00 |
| - Percentage of males              | 0.06 (0.04)  | 0.14            | 0.03 (0.08)  | 0.67            | 0.06 (0.04)   | 0.14 | 0.02 (2.13)   | 1.00 |
| - Sample size                      | -0.01 (0.01) | 0.44            | -0.01 (0.01) | 0.18            | 0.02 (0.02)   | 0.15 | 0.01 (1.15)   | 1.00 |
| - Baseline level of pain intensity | -0.15 (0.07) | <b>0.03</b>     | -0.03 (0.11) | 0.78            | 0.11 (0.07)   | 0.13 | 0.18 (34.01)  | 1.00 |
| PC vs. No intervention             |              |                 |              |                 |               |      |               |      |
| - Mean age                         | -0.32 (0.08) | <b>&lt;0.01</b> | -0.33 (0.06) | <b>&lt;0.01</b> | -0.51 (9.01)  | 0.96 | N/A           | N/A  |
| - Percentage of males              | 0.08 (0.03)  | <b>0.01</b>     | 0.12 (0.04)  | <b>0.01</b>     | 0.00 (0.67)   | 1.00 | N/A           | N/A  |
| - Sample size                      | 0.00 (0.01)  | 0.85            | -0.02 (0.01) | <b>0.04</b>     | 0.00 (0.07)   | 1.00 | N/A           | N/A  |
| - Baseline level of pain intensity | -0.09 (0.02) | <b>&lt;0.01</b> | -0.12 (0.03) | <b>&lt;0.01</b> | -0.08 (44.00) | 1.00 | N/A           | N/A  |

BT: behavioural therapy, BT+PC: behavioural therapy delivered with physiotherapy care, CBT: cognitive behavioural therapy, CBT+PC: cognitive behavioural therapy delivered with physiotherapy care, Coef.: coefficient, CP: combined psychological approaches, CP+PC: combined psychological approaches delivered with physiotherapy care, Csl: counselling, Csl+PC: counselling delivered with physiotherapy care, GP care: general practitioner care, Mindfulness+PC: mindfulness delivered with physiotherapy care, PC: physiotherapy care, PE: pain education, PE+PC: pain education delivered with physiotherapy care. SE: standard error, vs.: versus (i.e., compared with). Estimates in bold denote significance at  $p < 0.05$ .

#### Interpretation:

Some meta-regression results for comparisons between PC and psychological interventions, delivered with or without PC as a co-intervention, demonstrated significance at  $p < 0.05$ . However, for most affected comparisons, results were only significant at  $p < 0.05$  at one (majority) to two time points, per potential effect modifier (i.e., results were not consistent across follow-up time points for a given comparison). From a clinical perspective, it is unlikely that a covariate only modifies the effect of treatment at one or two time points, out of four time points in total. Thus, these findings are likely due to type I error.

For CBT+PC vs. PC, meta-regression of mean age demonstrated  $p < 0.05$  at three time points (post-intervention, and short and mid-term follow-ups). However, the number of studies available for this comparison at each respective time points was eight, one, and five. In accordance with the pre-specified criteria for performing sub-group analyses (i.e., (i)  $p$  value of the regression coefficient was  $< 0.05$ , (ii)  $\geq 10$  studies were available for the relevant comparison), sub-group analyses were not performed. Thus, whilst results suggest that mean age may be a potential effect modifier for pain intensity, insufficient number of studies precludes further investigations to conclude that mean age modifies the effect of CBT+PC compared with PC. Results likely reflect an “absence of evidence.”[105]

#### Conclusions:

We did not find any evidence suggesting that mean age, proportion of males, study sample size, or mean baseline levels of pain intensity were effect modifiers.

**Supplementary Table 27.** Results of meta-regression for fear avoidance

| Pairwise comparisons for fear avoidance | Post-intervention |      | Short-term follow-up |      | Mid-term follow-up |    | Long-term follow-up |      |
|-----------------------------------------|-------------------|------|----------------------|------|--------------------|----|---------------------|------|
|                                         | Coef. (SE)        | p    | Coef. (SE)           | p    | Coef. (SE)         | p  | Coef. (SE)          | p    |
| <b>PC vs. CBT</b>                       |                   |      |                      |      |                    |    |                     |      |
| - Mean age                              | 0.56 (4.39)       | 0.90 | N/A                  | N/A  | Np                 | Np | N/A                 | N/A  |
| - Percentage of males                   | 0.01 (1.89)       | 1.00 | N/A                  | N/A  | Np                 | Np | N/A                 | N/A  |
| - Sample size                           | 0.00 (0.08)       | 0.96 | N/A                  | N/A  | Np                 | Np | N/A                 | N/A  |
| - Baseline level of fear avoidance      | -0.02 (0.87)      | 0.98 | N/A                  | N/A  | Np                 | Np | N/A                 | N/A  |
| <b>PC vs. CBT+PC</b>                    |                   |      |                      |      |                    |    |                     |      |
| - Mean age                              | -0.19 (0.18)      | 0.29 | 0.20 (17.93)         | 1.00 | Np                 | Np | -0.33 (0.42)        | 0.43 |
| - Percentage of males                   | 0.05 (0.12)       | 0.68 | 0.01 (1.33)          | 1.00 | Np                 | Np | 0.39 (0.49)         | 0.43 |
| - Sample size                           | -0.01 (0.02)      | 0.58 | 0.00 (0.32)          | 1.00 | Np                 | Np | 0.05 (0.08)         | 0.58 |
| - Baseline level of fear avoidance      | 0.03 (0.07)       | 0.65 | -0.01 (1.35)         | 0.99 | Np                 | Np | -0.18 (1.26)        | 0.89 |
| <b>PC vs. BT</b>                        |                   |      |                      |      |                    |    |                     |      |
| - Mean age                              | 1.21 (4.88)       | 0.80 | N/A                  | N/A  | Np                 | Np | N/A                 | N/A  |
| - Percentage of males                   | -0.05 (1.89)      | 1.00 | N/A                  | N/A  | Np                 | Np | N/A                 | N/A  |
| - Sample size                           | -0.43 (1.33)      | 0.75 | N/A                  | N/A  | Np                 | Np | N/A                 | N/A  |
| - Baseline level of fear avoidance      | -0.01 (0.87)      | 0.99 | N/A                  | N/A  | Np                 | Np | N/A                 | N/A  |
| <b>PC vs. BT+PC</b>                     |                   |      |                      |      |                    |    |                     |      |
| - Mean age                              | N/A               | N/A  | N/A                  | N/A  | Np                 | Np | N/A                 | N/A  |
| - Percentage of males                   | N/A               | N/A  | N/A                  | N/A  | Np                 | Np | N/A                 | N/A  |
| - Sample size                           | N/A               | N/A  | N/A                  | N/A  | Np                 | Np | N/A                 | N/A  |
| - Baseline level of fear avoidance      | N/A               | N/A  | N/A                  | N/A  | Np                 | Np | N/A                 | N/A  |
| <b>PC vs. Mindfulness</b>               |                   |      |                      |      |                    |    |                     |      |
| - Mean age                              | N/A               | N/A  | N/A                  | N/A  | Np                 | Np | N/A                 | N/A  |
| - Percentage of males                   | N/A               | N/A  | N/A                  | N/A  | Np                 | Np | N/A                 | N/A  |
| - Sample size                           | N/A               | N/A  | N/A                  | N/A  | Np                 | Np | N/A                 | N/A  |
| - Baseline level of fear avoidance      | N/A               | N/A  | N/A                  | N/A  | Np                 | Np | N/A                 | N/A  |
| <b>PC vs. Mindfulness+PC</b>            |                   |      |                      |      |                    |    |                     |      |
| - Mean age                              | N/A               | N/A  | N/A                  | N/A  | Np                 | Np | N/A                 | N/A  |
| - Percentage of males                   | N/A               | N/A  | N/A                  | N/A  | Np                 | Np | N/A                 | N/A  |
| - Sample size                           | N/A               | N/A  | N/A                  | N/A  | Np                 | Np | N/A                 | N/A  |
| - Baseline level of fear avoidance      | N/A               | N/A  | N/A                  | N/A  | Np                 | Np | N/A                 | N/A  |
| <b>PC vs. PE</b>                        |                   |      |                      |      |                    |    |                     |      |
| - Mean age                              | 0.19 (0.70)       | 0.79 | 0.27 (3.92)          | 0.95 | Np                 | Np | N/A                 | N/A  |
| - Percentage of males                   | 0.03 (0.25)       | 0.89 | -0.07 (1.33)         | 0.96 | Np                 | Np | N/A                 | N/A  |
| - Sample size                           | -0.01 (0.19)      | 0.97 | 0.06 (1.26)          | 0.96 | Np                 | Np | N/A                 | N/A  |
| - Baseline level of fear avoidance      | 0.04 (0.73)       | 0.96 | 0.12 (2.31)          | 0.96 | Np                 | Np | N/A                 | N/A  |
| <b>PC vs. PE+PC</b>                     |                   |      |                      |      |                    |    |                     |      |
| - Mean age                              | 0.03 (0.10)       | 0.74 | 0.02 (0.07)          | 0.83 | Np                 | Np | N/A                 | N/A  |
| - Percentage of males                   | 0.00 (0.07)       | 0.95 | 0.00 (0.03)          | 0.94 | Np                 | Np | N/A                 | N/A  |
| - Sample size                           | 0.00 (0.02)       | 0.90 | 0.00 (0.00)          | 0.30 | Np                 | Np | N/A                 | N/A  |
| - Baseline level of fear avoidance      | -0.01 (0.05)      | 0.88 | -0.02 (0.02)         | 0.34 | Np                 | Np | N/A                 | N/A  |
| <b>PC vs. Csl</b>                       |                   |      |                      |      |                    |    |                     |      |
| - Mean age                              | N/A               | N/A  | N/A                  | N/A  | Np                 | Np | N/A                 | N/A  |
| - Percentage of males                   | N/A               | N/A  | N/A                  | N/A  | Np                 | Np | N/A                 | N/A  |
| - Sample size                           | N/A               | N/A  | N/A                  | N/A  | Np                 | Np | N/A                 | N/A  |
| - Baseline level of fear avoidance      | N/A               | N/A  | N/A                  | N/A  | Np                 | Np | N/A                 | N/A  |
| <b>PC vs. Csl+PC</b>                    |                   |      |                      |      |                    |    |                     |      |
| - Mean age                              | N/A               | N/A  | N/A                  | N/A  | Np                 | Np | N/A                 | N/A  |
| - Percentage of males                   | N/A               | N/A  | N/A                  | N/A  | Np                 | Np | N/A                 | N/A  |
| - Sample size                           | N/A               | N/A  | N/A                  | N/A  | Np                 | Np | N/A                 | N/A  |
| - Baseline level of fear avoidance      | N/A               | N/A  | N/A                  | N/A  | Np                 | Np | N/A                 | N/A  |
| <b>PC vs. CP</b>                        |                   |      |                      |      |                    |    |                     |      |
| - Mean age                              | 0.33 (0.35)       | 0.34 | 0.05 (39.35)         | 1.00 | Np                 | Np | N/A                 | N/A  |
| - Percentage of males                   | 0.12 (0.13)       | 0.35 | 0 (1.69)             | 1.00 | Np                 | Np | N/A                 | N/A  |
| - Sample size                           | 0.00 (0.06)       | 1.00 | 0.00 (0.29)          | 1.00 | Np                 | Np | N/A                 | N/A  |

|                                    |              |      |              |      |    |    |     |     |
|------------------------------------|--------------|------|--------------|------|----|----|-----|-----|
| - Baseline level of fear avoidance | -0.16 (0.47) | 0.74 | 0.01 (3.87)  | 1.00 | Np | Np | N/A | N/A |
| PC vs. CP+PC                       |              |      |              |      |    |    |     |     |
| - Mean age                         | 0.32 (0.21)  | 0.14 | 0.16 (16.73) | 1.00 | Np | Np | N/A | N/A |
| - Percentage of males              | 0.12 (0.09)  | 0.19 | 0.30 (31.63) | 0.99 | Np | Np | N/A | N/A |
| - Sample size                      | 0.02 (0.12)  | 0.85 | 0.00 (0.23)  | 1.00 | Np | Np | N/A | N/A |
| - Baseline level of fear avoidance | -0.13 (0.26) | 0.62 | 0.03 (3.18)  | 0.99 | Np | Np | N/A | N/A |
| PC vs. Advice                      |              |      |              |      |    |    |     |     |
| - Mean age                         | -0.01 (9.86) | 1.00 | N/A          | N/A  | Np | Np | N/A | N/A |
| - Percentage of males              | 0.01 (0.91)  | 1.00 | N/A          | N/A  | Np | Np | N/A | N/A |
| - Sample size                      | 0.00 (0.01)  | 0.94 | N/A          | N/A  | Np | Np | N/A | N/A |
| - Baseline level of fear avoidance | 0.01 (0.53)  | 0.99 | N/A          | N/A  | Np | Np | N/A | N/A |
| PC vs. Usual care                  |              |      |              |      |    |    |     |     |
| - Mean age                         | N/A          | N/A  | N/A          | N/A  | Np | Np | N/A | N/A |
| - Percentage of males              | N/A          | N/A  | N/A          | N/A  | Np | Np | N/A | N/A |
| - Sample size                      | N/A          | N/A  | N/A          | N/A  | Np | Np | N/A | N/A |
| - Baseline level of fear avoidance | N/A          | N/A  | N/A          | N/A  | Np | Np | N/A | N/A |
| PC vs. GP care                     |              |      |              |      |    |    |     |     |
| - Mean age                         | N/A          | N/A  | N/A          | N/A  | Np | Np | N/A | N/A |
| - Percentage of males              | N/A          | N/A  | N/A          | N/A  | Np | Np | N/A | N/A |
| - Sample size                      | N/A          | N/A  | N/A          | N/A  | Np | Np | N/A | N/A |
| - Baseline level of fear avoidance | N/A          | N/A  | N/A          | N/A  | Np | Np | N/A | N/A |
| PC vs. No intervention             |              |      |              |      |    |    |     |     |
| - Mean age                         | 0.53 (4.39)  | 0.90 | N/A          | N/A  | Np | Np | N/A | N/A |
| - Percentage of males              | -0.13 (1.93) | 0.95 | N/A          | N/A  | Np | Np | N/A | N/A |
| - Sample size                      | 0.00 (0.06)  | 1.00 | N/A          | N/A  | Np | Np | N/A | N/A |
| - Baseline level of fear avoidance | -0.01 (0.87) | 1.00 | N/A          | N/A  | Np | Np | N/A | N/A |

BT: behavioural therapy, BT+PC: behavioural therapy delivered with physiotherapy care, CBT: cognitive behavioural therapy, CBT+PC: cognitive behavioural therapy delivered with physiotherapy care, Coef.: coefficient, CP: combined psychological approaches, CP+PC: combined psychological approaches delivered with physiotherapy care, Csl: counselling, Csl+PC: counselling delivered with physiotherapy care, GP care: general practitioner care, Mindfulness+PC: mindfulness delivered with physiotherapy care, PC: physiotherapy care, PE: pain education, PE+PC: pain education delivered with physiotherapy care. SE: standard error, vs.: versus (i.e., compared with). Estimates in bold denote significance at  $p < 0.05$ . Np: not performed – meta-regression was unable to be performed due to limitations of the network structure (i.e., limited number of studies).

#### Interpretation:

No meta-regression results demonstrated significance at  $p < 0.05$  for any comparisons.

#### Conclusion:

We did not find any evidence suggesting that mean age, proportion of males, study sample size, or mean baseline levels of fear avoidance, were effect modifiers.



**Supplementary Table 28.** Results of meta-regression for intervention compliance

| Post-intervention                                |              |          |                                                  |              |             |
|--------------------------------------------------|--------------|----------|--------------------------------------------------|--------------|-------------|
| Pairwise comparisons for intervention compliance | Coef. (SE)   | <i>p</i> | Pairwise comparisons for intervention compliance | Coef. (SE)   | <i>p</i>    |
| PC vs. CBT                                       |              |          | PC vs. Csl                                       |              |             |
| - Mean age                                       | N/A          | N/A      | - Mean age                                       | N/A          | N/A         |
| - Percentage of males                            | N/A          | N/A      | - Percentage of males                            | N/A          | N/A         |
| - Sample size                                    | N/A          | N/A      | - Sample size                                    | N/A          | N/A         |
| PC vs CBT+PC                                     |              |          | PC vs. Csl+PC                                    |              |             |
| - Mean age                                       | 0.14 (0.16)  | 0.36     | - Mean age                                       | N/A          | N/A         |
| - Percentage of males                            | -0.04 (0.03) | 0.09     | - Percentage of males                            | N/A          | N/A         |
| - Sample size                                    | 0.00 (0.01)  | 0.83     | - Sample size                                    | N/A          | N/A         |
| PC vs. BT                                        |              |          | PC vs. CP                                        |              |             |
| - Mean age                                       | N/A          | N/A      | - Mean age                                       | 0.08 (0.18)  | 0.65        |
| - Percentage of males                            | N/A          | N/A      | - Percentage of males                            | 0.03 (0.02)  | 0.23        |
| - Sample size                                    | N/A          | N/A      | - Sample size                                    | 0.01 (0.02)  | 0.44        |
| PC vs. BT+PC                                     |              |          | PC vs. CP+PC                                     |              |             |
| - Mean age                                       | N/A          | N/A      | - Mean age                                       | 0.09 (0.15)  | 0.56        |
| - Percentage of males                            | N/A          | N/A      | - Percentage of males                            | 0.03 (0.01)  | <b>0.02</b> |
| - Sample size                                    | N/A          | N/A      | - Sample size                                    | 0.00 (0.01)  | 0.98        |
| PC vs. Mindfulness                               |              |          | PC vs. Advice                                    |              |             |
| - Mean age                                       | N/A          | N/A      | - Mean age                                       | N/A          | N/A         |
| - Percentage of males                            | N/A          | N/A      | - Percentage of males                            | N/A          | N/A         |
| - Sample size                                    | N/A          | N/A      | - Sample size                                    | N/A          | N/A         |
| PC vs. Mindfulness+PC                            |              |          | PC vs. Usual care                                |              |             |
| - Mean age                                       | N/A          | N/A      | - Mean age                                       | -0.22 (3.88) | 0.95        |
| - Percentage of males                            | N/A          | N/A      | - Percentage of males                            | -0.87 (1.21) | 0.47        |
| - Sample size                                    | N/A          | N/A      | - Sample size                                    | 0.07 (0.10)  | 0.51        |
| PC vs. PE                                        |              |          | PC vs. GP care                                   |              |             |
| - Mean age                                       | 0.56 (0.57)  | 0.33     | - Mean age                                       | 0.04 (0.17)  | 0.82        |
| - Percentage of males                            | -0.10 (0.12) | 0.41     | - Percentage of males                            | 0.04 (0.03)  | 0.26        |
| - Sample size                                    | 0.06 (0.09)  | 0.53     | - Sample size                                    | -0.06 (0.12) | 0.62        |
| PC vs. PE+PC                                     |              |          | PC vs. No intervention                           |              |             |
| - Mean age                                       | -0.05 (0.11) | 0.66     | - Mean age                                       | N/A          | N/A         |
| - Percentage of males                            | 0.08 (0.07)  | 0.24     | - Percentage of males                            | N/A          | N/A         |
| - Sample size                                    | 0.00 (0.02)  | 0.95     | - Sample size                                    | N/A          | N/A         |

BT: behavioural therapy, BT+PC: behavioural therapy delivered with physiotherapy care, CBT: cognitive behavioural therapy, CBT+PC: cognitive behavioural therapy delivered with physiotherapy care, Coef.: coefficient, CP: combined psychological approaches, CP+PC: combined psychological approaches delivered with physiotherapy care, Csl: counselling, Csl+PC: counselling delivered with physiotherapy care, GP care: general practitioner care, Mindfulness+PC: mindfulness delivered with physiotherapy care, PC: physiotherapy care, PE: pain education, PE+PC: pain education delivered with physiotherapy care. SE: standard error, vs.: versus (i.e., compared with). Estimates in bold denote significance at  $p < 0.05$ .

**Interpretation:**

Meta-regression results demonstrated significance at  $p < 0.05$  for CP+PC compared with PC for percentage of males, at post-intervention. Only three studies directly compared CP+PC with PC, with sample sizes varying from 45,[5] 66,[47] and 132.[6] In accordance with the pre-specified criteria for performing sub-group analyses (i.e., (i)  $p$  value of the regression coefficient was  $< 0.05$ , (ii)  $\geq 10$  studies were available for the relevant comparison), sub-group analyses were not performed.

**Conclusion:**

We did not find any evidence suggesting that mean age, proportion of males, or study sample size, were effect modifiers.

## REFERENCES

1. Ho E, Ferreira M, Chen L, et al. Psychological interventions for chronic non-specific low back pain: protocol of a systematic review with network meta-analysis. *BMJ Open* 2020;10:e034996. doi:10.1136/bmjopen-2019-034996
2. Alaranta H, Rytökoski U, Rissanen A, et al. Intensive physical and psychosocial training program for patients with chronic low back pain. A controlled clinical trial. *Spine* 1994;19:1339-49. doi:10.1097/00007632-199406000-00007
3. Aliyu F, Wasiu A, Bello B. Effects of a combined lumbar stabilization exercise and cognitive behavioral therapy on selected variables of individuals with non-specific low back pain: A randomized clinical trial. *Fisioterapia* 2018;40:257-64. doi:10.1016/j.ft.2018.07.002
4. Altmaier EM, Lehmann TR, Russell DW, et al. The effectiveness of psychological interventions for the rehabilitation of low back pain: a randomized controlled trial evaluation. *Pain* 1992;49:329-35. doi:10.1016/0304-3959(92)90240-C
5. Bagheri R, Hedayati R, Ehsani F, et al. Cognitive Behavioral Therapy With Stabilization Exercises Affects Transverse Abdominis Muscle Thickness in Patients With Chronic Low Back Pain: A Double-Blinded Randomized Trial Study. *J Manipulative Physiol Ther* 2020;43:418-28. doi:10.1016/j.jmpt.2019.03.015
6. Bendix AF, Bendix T, Labriola M, et al. Functional restoration for chronic low back pain: two-year follow-up of two randomized clinical trials. *Spine* 1998;23:717-25. doi:10.1097/00007632-199803150-00013
7. Bendix A, Bendix T, Hastrup C, et al. A prospective, randomized 5-year follow-up study of functional restoration in chronic low back pain patients. *Eur Spine J* 1998;7:111-19. doi:10.1007/s005860050040
8. Bendix T, Bendix A, Labriola M, et al. Functional restoration versus outpatient physical training in chronic low back pain: a randomized comparative study. *Spine* 2000;25:2494-500. doi:10.1097/00007632-200010010-00012
9. Brox JI, Sørensen R, Friis A, et al. Randomized clinical trial of lumbar instrumented fusion and cognitive intervention and exercises in patients with chronic low back pain and disc degeneration. *Spine* 2003;28:1913-21. doi:10.1097/01.BRS.0000083234.62751.7A
10. Cherkin DC, Deyo RA, Street JH, et al. Pitfalls of patient education: limited success of a program for back pain in primary care. *Spine* 1996;21:345-55. doi:10.1097/00007632-199602010-00019
11. Cherkin DC, Sherman KJ, Balderson BH, et al. Effect of mindfulness-based stress reduction vs cognitive behavioral therapy or usual care on back pain and functional limitations in adults with chronic low back pain: a randomized clinical trial. *JAMA* 2016;315:1240-49. doi:10.1001/jama.2016.2323
12. Chiauzzi E, Pujol LA, Wood M, et al. painACTION-back pain: a self-management website for people with chronic back pain. *Pain Med* 2010;11:1044-58. doi:10.1111/j.1526-4637.2010.00879.x
13. Christiansen S, Oettingen G, Dahme B, et al. A short goal-pursuit intervention to improve physical capacity: A randomized clinical trial in chronic back pain patients. *Pain* 2010;149:444-52. doi:10.1016/j.pain.2009.12.015
14. Cuesta-Vargas AI, García-Romero JC, Arroyo-Morales M, et al. Exercise, manual therapy, and education with or without high-intensity deep-water running for nonspecific chronic low back pain: a pragmatic randomized controlled trial. *Am J Phys Med Rehabil* 2011;90:526-38. doi:10.1097/PHM.0b013e31821a71d0
15. Dufour N, Thamsborg G, Oefeldt A, et al. A Randomized, Clinical Trial Comparing Group-Based Multidisciplinary Biopsychosocial Rehabilitation and Intensive Individual Therapist-Assisted Back Muscle Strengthening Exercises. *Spine* 2010;35:469-76. doi:10.1097/BRS.0b013e3181b8db2e
16. Fairbank J, Frost H, Wilson-MacDonald J, et al. Randomised controlled trial to compare

- surgical stabilisation of the lumbar spine with an intensive rehabilitation programme for patients with chronic low back pain: the MRC spine stabilisation trial. *BMJ* 2005;330:1233-33. doi:10.1136/bmj.38441.620417.8F [published Online first: 2005/05/23]
17. Farokhi Z, Aminian Far A, Ziari A, et al. Effects of mindfulness based cognitive therapy on disability, thickness of the lumbar multifidus muscle, fear avoidance beliefs and metacognitive beliefs in the subjects with non-specific low back pain. *Koomesh* 2020;22:483-91. doi:10.29252/koomesh.22.3.483
  18. Friedrich M, Gittler G, Halberstadt Y, et al. Combined exercise and motivation program: effect on the compliance and level of disability of patients with chronic low back pain: a randomized controlled trial. *Arch Phys Med Rehab* 1998;79:475-87. doi:10.1016/s0003-9993(98)90059-4
  19. Friedrich M, Gittler G, Arendasy M, et al. Long-term effect of a combined exercise and motivational program on the level of disability of patients with chronic low back pain. *Spine* 2005;30:995-1000. doi:10.1097/01.brs.0000160844.71551.af
  20. Frost H, Lamb S, Moffett JK, et al. A fitness programme for patients with chronic low back pain: 2-year follow-up of a randomised controlled trial. *Pain* 1998;75:273-79. doi:10.1016/s0304-3959(98)00005-0
  21. Galan-Martin MA, Montero-Cuadrado F, Lluch-Girbes E, et al. Pain neuroscience education and physical therapeutic exercise for patients with chronic spinal pain in Spanish physiotherapy primary care: a pragmatic randomized controlled trial. *J Clin Med* 2020;9:1201. doi:10.3390/jcm9041201
  22. Gannon J, Atkinson JH, Chircop-Rollick T, et al. Telehealth therapy effects of nurses and mental health professionals from 2 randomized controlled trials for chronic back pain. *Clin J Pain* 2019;35:295-303. doi:10.1097/AJP.0000000000000678
  23. Gardner T, Refshauge K, McAuley J, et al. Combined education and patient-led goal setting intervention reduced chronic low back pain disability and intensity at 12 months: a randomised controlled trial. *Brit J Sport Med* 2019;53:1424-31. doi:10.1136/bjsports-2018-100080
  24. Ghadyani L, Tavafian SS, Kazemnejad A, et al. Effectiveness of multidisciplinary group-based intervention versus individual physiotherapy for improving chronic low back pain in nursing staff: a clinical trial with 3-and 6-month follow-up visits from Tehran, Iran. *Asian Spine J* 2017;11:396. doi:10.4184/asj.2017.11.3.396
  25. Gibbs BB, Hergenroeder AL, Perdomo SJ, et al. Reducing sedentary behaviour to decrease chronic low back pain: the stand back randomised trial. *Occup Environ Med* 2018;75:321-27. doi:10.1136/oemed-2017-104732
  26. Glombiewski JA, Hartwich-Tersek J, Rief W. Two psychological interventions are effective in severely disabled, chronic back pain patients: a randomised controlled trial. *Int J Behav Med* 2010;17:97-107. doi:10.1007/s12529-009-9070-4
  27. Glombiewski JA, Holzapfel S, Riecke J, et al. Exposure and CBT for chronic back pain: An RCT on differential efficacy and optimal length of treatment. *J Consult Clin Psychol* 2018;86:533. doi:10.1037/ccp0000298
  28. Godfrey E, Wileman V, Holmes MG, et al. Physical therapy informed by acceptance and commitment therapy (PACT) versus usual care physical therapy for adults with chronic low back pain: a randomized controlled trial. *J Pain* 2020;21:71-81. doi:10.1016/j.jpain.2019.05.012
  29. Gould HM, Atkinson JH, Chircop-Rollick T, et al. A randomized placebo-controlled trial of desipramine, cognitive behavioral therapy, and active placebo therapy for low back pain. *Pain* 2020;161:1341-49. doi:10.1097/j.pain.0000000000001834
  30. Grande-Alonso M, Suso-Martí L, Cuenca-Martínez F, et al. Physiotherapy based on a biobehavioral approach with or without orthopedic manual physical therapy in the treatment of nonspecific chronic low back pain: a randomized controlled trial. *Pain Med*

- 2019;20:2571-87. doi:10.1093/pm/pnz093
31. Haas M, Group E, Muench J, et al. Chronic disease self-management program for low back pain in the elderly. *J Manipulative Physiol Ther* 2005;28:228-37. doi:10.1016/j.jmpt.2005.03.010
  32. Harris A, Moe TF, Eriksen HR, et al. Brief intervention, physical exercise and cognitive behavioural group therapy for patients with chronic low back pain (The CINS trial). *Eur J Pain* 2017;21:1397-407. doi:10.1002/ejp.1041
  33. Jensen LD, Maribo T, Schiøttz-Christensen B, et al. Counselling low-back-pain patients in secondary healthcare: a randomised trial addressing experienced workplace barriers and physical activity. *Occup Environ Med* 2012;69:21-28. doi:10.1136/oem.2010.064055
  34. Johnson RE, Jones GT, Wiles NJ, et al. Active exercise, education, and cognitive behavioral therapy for persistent disabling low back pain: a randomized controlled trial. *Spine* 2007;32:1578-85. doi:10.1097/BRS.0b013e318074f890
  35. Kapitza KP, Passie T, Bernateck M, et al. First non-contingent respiratory biofeedback placebo versus contingent biofeedback in patients with chronic low back pain: a randomized, controlled, double-blind trial. *Appl Psychophysiol Biofeedback* 2010;35:207-17. doi:10.1007/s10484-010-9130-1
  36. Khan M, Akhter S, Rani Soomro R, et al. The effectiveness of cognitive behavioral therapy (CBT) with general exercises versus general exercises alone in the management of chronic low back pain. *Pak J Pharm Sci* 2014;27
  37. Khodadad B, Letafatkar A, Hadadnezhad M, et al. Comparing the effectiveness of cognitive functional treatment and lumbar stabilization treatment on pain and movement control in patients with low back pain. *Sports Health* 2020;12:289-95. doi:10.1177/1941738119886854
  38. Krein SL, Kadri R, Hughes M, et al. Pedometer-based internet-mediated intervention for adults with chronic low back pain: randomized controlled trial. *J Med Internet Res* 2013;15:e181. doi:10.2196/jmir.2605
  39. Lamb SE, Hansen Z, Lall R, et al. Group cognitive behavioural treatment for low-back pain in primary care: a randomised controlled trial and cost-effectiveness analysis. *Lancet* 2010;375:916-23. doi:10.1016/S0140-6736(09)62164-4
  40. Lamb SE, Lall R, Hansen Z, et al. A multicentred randomised controlled trial of a primary-care based cognitive behavioural programme for low back pain. The Back Skills Training (BeST) trial. *Health Technol Assess* 2010;14:1-282. doi:10.3310/hta14410
  41. Lambeck LC, van Mechelen W, Knol DL, et al. Randomised controlled trial of integrated care to reduce disability from chronic low back pain in working and private life. *BMJ* 2010;340 doi:10.1136/bmj.c1035
  42. Leeuw M, Goossens ME, van Breukelen GJ, et al. Exposure in vivo versus operant graded activity in chronic low back pain patients: results of a randomized controlled trial. *Pain* 2008;138:192-207. doi:10.1016/j.pain.2007.12.009
  43. Luedtke K, Rushton A, Wright C, et al. Effectiveness of transcranial direct current stimulation preceding cognitive behavioural management for chronic low back pain: sham controlled double blinded randomised controlled trial. *BMJ* 2015;350 doi:10.1136/bmj.h1640
  44. Lorig KR, Laurent DD, Deyo RA, et al. Can a Back Pain E-mail Discussion Group improve health status and lower health care costs?: A randomized study. *Arch Intern Med* 2002;162:792-96. doi:10.1001/archinte.162.7.792
  45. Louw A, Farrell K, Landers M, et al. The effect of manual therapy and neuroplasticity education on chronic low back pain: a randomized clinical trial. *J Man Manip Ther* 2017;25:227-34. doi:10.1080/10669817.2016.1231860
  46. Macedo LG, Latimer J, Maher CG, et al. Effect of motor control exercises versus graded activity in patients with chronic nonspecific low back pain: a randomized controlled trial. *Phys Ther* 2012;92:363-77. doi:10.2522/ptj.20110290

47. Magalhães MO, Comachio J, Ferreira PH, et al. Effectiveness of graded activity versus physiotherapy in patients with chronic nonspecific low back pain: midterm follow up results of a randomized controlled trial. *Braz J Phys Ther* 2018;22:82-91. doi:10.1016/j.bjpt.2017.07.002
48. Magnussen LM SL, Skouen JS, Eriksen HR. Motivating disability pensioners with back pain to return to work—a randomized controlled trial. *J Rehabil Med* 2007;39:81-87. doi:10.2340/16501977-0004
49. Mehling WE, Hamel KA, Acree M, et al. Randomized, controlled trial of breath therapy for chronic low back pain. *J Bodyw Mov Ther* 2005;10:96-98. doi:10.1016/j.jbmt.2005.09.003
50. Michaelson P, Holmberg D, Aasa B, et al. High load lifting exercise and low load motor control exercises as interventions for patients with mechanical low back pain: a randomized controlled trial with 24-month follow-up. *J Rehabil Med* 2016;48:456-63. doi:10.2340/16501977-2091
51. Monticone M, Ferrante S, Rocca B, et al. Effect of a Long-lasting Multidisciplinary Program on Disability and Fear-Avoidance Behaviors in Patients With Chronic Low Back Pain: Results of a Randomized Controlled Trial. *Clin J Pain* 2013;29:929-38. doi:10.1097/AJP.0b013e31827fef7e
52. Monticone M, Ambrosini E, Rocca B, et al. Group-based task-oriented exercises aimed at managing kinesiophobia improved disability in chronic low back pain. *Eur J Pain* 2016;20:541-51. doi:10.1002/ejp.756
53. Moore JE, Von Korff M, Cherkin D, et al. A randomized trial of a cognitive-behavioral program for enhancing back pain self care in a primary care setting. *Pain* 2000;88:145-53. doi:10.1016/S0304-3959(00)00314-6
54. Morone NE, Greco CM, Moore CG, et al. A Mind-Body Program for Older Adults With Chronic Low Back Pain: A Randomized Clinical Trial. *JAMA Intern Med* 2016;176:329-37. doi:10.1001/jamainternmed.2015.8033
55. Moseley L. Combined physiotherapy and education is efficacious for chronic low back pain. *Aust J Physiother* 2002;48:297-302. doi:10.1016/s0004-9514(14)60169-0
56. Moseley GL. Joining forces—combining cognition-targeted motor control training with group or individual pain physiology education: a successful treatment for chronic low back pain. *J Man Manip Ther* 2003;11:88-94. doi:10.1179/106698103790826383
57. Moseley GL, Nicholas MK, Hodges PW. A randomized controlled trial of intensive neurophysiology education in chronic low back pain. *Clin J Pain* 2004;20:324-30. doi:10.1097/00002508-200409000-00007
58. Nguyen C, Boutron I, Rein C, et al. Intensive spa and exercise therapy program for returning to work for low back pain patients: a randomized controlled trial. *Sci Rep* 2017;7:17956-56. doi:10.1038/s41598-017-18311-z
59. Nicholas MK, Wilson PH, Goyen J. Operant-behavioural and cognitive-behavioural treatment for chronic low back pain. *Behav Res Ther* 1991;29:225-38. doi:10.1016/0005-7967(91)90112-G
60. O'Keeffe M, Sullivan P, Purtill H, et al. Cognitive functional therapy compared with a group-based exercise and education intervention for chronic low back pain: a multicentre randomised controlled trial (RCT). *Br J Sports Med* 2020;54:782. doi:10.1136/bjsports-2019-100780
61. Paolucci T, Zangrando F, Iosa M, et al. Improved interoceptive awareness in chronic low back pain: a comparison of Back school versus Feldenkrais method. *Disabil Rehabil* 2017;39:994-1001. doi:10.1080/09638288.2016.1175035
62. Pardo GB, Gírbés EL, Roussel NA, et al. Pain neurophysiology education and therapeutic exercise for patients with chronic low back pain: a single-blind randomized controlled trial. *Arch Phys Med Rehab* 2018;99:338-47. doi:10.1016/j.apmr.2017.10.016
63. Petrozzi MJ, Leaver A, Ferreira PH, et al. Addition of MoodGYM to physical treatments for

- chronic low back pain: A randomized controlled trial. *Chiropr Man Ther* 2019;27:54. doi:10.1186/s12998-019-0277-4
64. Pires D, Cruz EB, Caeiro C. Aquatic exercise and pain neurophysiology education versus aquatic exercise alone for patients with chronic low back pain: a randomized controlled trial. *Clin Rehabil* 2015;29:538-47. doi:10.1177/0269215514549033
  65. Poole H, Glenn S, Murphy P. A randomised controlled study of reflexology for the management of chronic low back pain. *Eur J Pain* 2007;11:878-87. doi:10.1016/j.ejpain.2007.01.006
  66. Rabiei P, Sheikhi B, Letafatkar A. Comparing Pain Neuroscience Education Followed by Motor Control Exercises With Group-Based Exercises for Chronic Low Back Pain: A Randomized Controlled Trial. *Pain Pract* 2021;21:333-42. doi:10.1111/papr.12963
  67. Reiner K, Shvartzman P, Cohen ZZ, et al. Assessing the Effectiveness of Mindfulness in the Treatment of Chronic Back Pain: Use of Quantitative Sensory Pain Assessment. *Mindfulness* 2019;10:943-52. doi:10.1007/s12671-018-1053-6
  68. Reme SE, Tveito TH, Harris A, et al. Cognitive interventions and nutritional supplements (The CINS Trial): a randomized controlled, multicenter trial comparing a brief intervention with additional cognitive behavioral therapy, seal oil, and soy oil for sick-listed low back pain patients. *Spine* 2016;41:1557-64. doi:10.1097/BRS.0000000000001596
  69. Rizzo R, Medeiros F, Pires L, et al. Hypnosis Enhances the Effects of Pain Education in Patients With Chronic Nonspecific Low Back Pain: A Randomized Controlled Trial. *J Pain* 2018;19:1103.e1-03.e9. doi:10.1016/j.jpain.2018.03.013
  70. Rose MJ, Reilly JP, Pennie B, et al. Chronic low back pain rehabilitation programs: a study of the optimum duration of treatment and a comparison of group and individual therapy. *Spine* 1997;22:2246-51. doi:10.1097/00007632-199710010-00009
  71. Sander LB, Paganini S, Terhorst Y, et al. Effectiveness of a Guided Web-Based Self-help Intervention to Prevent Depression in Patients With Persistent Back Pain: The PROD-BP Randomized Clinical Trial. *JAMA Psychiatry* 2020;77:1001-11. doi:10.1001/jamapsychiatry.2020.1021
  72. Santaella da Fonseca Lopes de Sousa K, Garcia Orfale A, Mara Meireles S, et al. Assessment of a Biofeedback Program to Treat Chronic Low Back Pain. *J Musculoskelet Pain* 2009;17:369-77. doi:10.3109/10582450903284828
  73. Saper RB, Lemaster C, Delitto A, et al. Yoga, Physical Therapy, or Education for Chronic Low Back Pain. *Ann Intern Med* 2017;167:85-94. doi:10.7326/M16-2579
  74. Saracoglu I, Arik MI, Afsar E, et al. The effectiveness of pain neuroscience education combined with manual therapy and home exercise for chronic low back pain: A single-blind randomized controlled trial. *Physiother Theory Pract* 2020:1-11. doi:10.1080/09593985.2020.1809046
  75. Saracoglu I, Arik MI, Afsar E, et al. The short-term effects of neuroscience pain education on quality of life in patients with chronic low back pain: A single-blinded randomized controlled trial. *Eur J Integr Med* 2020;33:101046. doi:10.1016/j.eujim.2019.101046
  76. Schaller A, Dintsios C-M, Icks A, et al. Promoting physical activity in low back pain patients: six months follow-up of a randomised controlled trial comparing a multicomponent intervention with a low intensity intervention. *Clin Rehabil* 2016;30:865-77. doi:10.1177/0269215515618730
  77. Shariat A, Alizadeh R, Moradi V, et al. The impact of modified exercise and relaxation therapy on chronic lower back pain in office workers: a randomized clinical trial. *J Exerc Rehabil* 2019;15:703-08. doi:10.12965/jer.1938490.245
  78. Siemonsma PC, Stuive I, Roorda LD, et al. Cognitive Treatment of Illness Perceptions in Patients With Chronic Low Back Pain: A Randomized Controlled Trial. *Phys Ther* 2013;93:435-48. doi:10.2522/ptj.20110150
  79. Smeets RJEM, Vlaeyen JWS, Hidding A, et al. Chronic low back pain: Physical training, graded activity with problem solving training, or both? The one-year post-treatment results

- of a randomized controlled trial. *Pain* 2008;134:263-76. doi:10.1016/j.pain.2007.04.021
80. Spinhoven P, ter Kuile M, Kole-Snijders AMJ, et al. Catastrophizing and internal pain control as mediators of outcome in the multidisciplinary treatment of chronic low back pain. *Eur J Pain* 2004;8:211-19. doi:10.1016/j.ejpain.2003.08.003
  81. Soleymani A, Arani AM, Raeissadat SA, et al. Rumination-Focused Cognitive-Behavioral Therapy for Chronic Low Back Pain: A Randomized Controlled Trial. *Galen Medical Journal* 2020;9:e1722. doi:10.31661/gmj.v9i0.1722
  82. Sorensen PH, Bendix T, Manniche C, et al. An educational approach based on a non-injury model compared with individual symptom-based physical training in chronic LBP. A pragmatic, randomised trial with a one-year follow-up. *BMC Musculoskelet Disord* 2010;11:212. doi:10.1186/1471-2474-11-212
  83. Stuckey SJ, Jacobs A, Goldfarb J. EMG Biofeedback Training, Relaxation Training, and Placebo for the Relief of Chronic Back Pain. *Percept Mot Skills* 1986;63:1023-36. doi:10.2466/pms.1986.63.3.1023
  84. Tan G, Rintala DH, Jensen MP, et al. A randomized controlled trial of hypnosis compared with biofeedback for adults with chronic low back pain. *Eur J Pain* 2015;19:271-80. doi:10.1002/ejp.545
  85. Tavafian SS, Jamshidi AR, Mohammad K. Treatment of low back pain: Second extended follow up of an original trial (NCT00600197) comparing a multidisciplinary group-based rehabilitation program with oral drug treatment alone up to 30 months. *Int J Rheum Dis* 2017;20:1910-16. doi:10.1111/1756-185X.12540
  86. Tekur P, Singphow C, Nagendra HR, et al. Effect of Short-Term Intensive Yoga Program on Pain, Functional Disability and Spinal Flexibility in Chronic Low Back Pain: A Randomized Control Study. *J Altern Complement Med* 2008;14:637-44. doi:10.1089/acm.2007.0815
  87. Tilbrook HE, Cox H, Hewitt CE, et al. Yoga for Chronic Low Back Pain. *Ann Intern Med* 2011;155:569-78. doi:10.7326/0003-4819-155-9-201111010-00003
  88. Turner JA. Comparison of group progressive-relaxation training and cognitive-behavioral group therapy for chronic low back pain. *J Consult Clin Psychol* 1982;50:757-65. doi:10.1037/0022-006X.50.5.757
  89. Turner JA, Clancy S. Comparison of operant behavioral and cognitive-behavioral group treatment for chronic low back pain. *J Consult Clin Psychol* 1988;56:261-66. doi:10.1037/0022-006X.56.2.261
  90. Turner JA, Clancy S, McQuade KJ, et al. Effectiveness of behavioral therapy for chronic low back pain: A component analysis. *J Consult Clin Psychol* 1990;58:573-79. doi:10.1037/0022-006X.58.5.573
  91. Turner JA, Jensen MP. Efficacy of cognitive therapy for chronic low back pain. *Pain* 1993;52 doi:10.1016/0304-3959(93)90128-C
  92. Ünal M, Evcik E, Kocatürk M, et al. Investigating the effects of myofascial induction therapy techniques on pain, function and quality of life in patients with chronic low back pain. *J Bodyw Mov Ther* 2020;24:188-95. doi:10.1016/j.jbmt.2020.07.014
  93. van der Roer N, van Tulder M, Barendse J, et al. Intensive group training protocol versus guideline physiotherapy for patients with chronic low back pain: a randomised controlled trial. *European Spine Journal* 2008;17:1193-200. doi:10.1007/s00586-008-0718-6 [published Online rst: 2008/07/29]
  94. Vibe Fersum K, Smith A, Kvåle A, et al. Cognitive functional therapy in patients with non-specific chronic low back pain—a randomized controlled trial 3-year follow-up. *Eur J Pain* 2019;23:1416-24. doi:10.1002/ejp.1399
  95. Von Korff M, Balderson BHK, Saunders K, et al. A trial of an activating intervention for chronic back pain in primary care and physical therapy settings. *Pain* 2005;113 doi:10.1016/j.pain.2004.11.007
  96. Vong SK, Cheing GL, Chan F, et al. Motivational enhancement therapy in addition to physical

- therapy improves motivational factors and treatment outcomes in people with low back pain: a randomized controlled trial. *Arch Phys Med Rehab* 2011;113:323-30. doi:10.1016/j.apmr.2010.10.016
97. Woods MP, Asmundson GJG. Evaluating the efficacy of graded in vivo exposure for the treatment of fear in patients with chronic back pain: A randomized controlled clinical trial. *Pain* 2008;136:271-80. doi:10.1016/j.pain.2007.06.037
  98. Yao C, Li Z, Zhang S, et al. Effects of Wuqinxi in the Patients with Chronic Low Back Pain: A Randomized Controlled Trial. *Evid Based Complement Alternat Med* 2020;2020:1428246-46. doi:10.1155/2020/1428246
  99. Cuesta-Vargas AI, Garcia-Romero JC, Arroyo-Morales M, et al. Exercise, manual therapy, and education with or without high-intensity deep-water running for nonspecific chronic low back pain: a pragmatic randomized controlled trial. *American journal of physical medicine & rehabilitation* 2011;90:526-8. doi:https://dx.doi.org/10.1097/PHM.0b013e31821a71d0
  100. Chaory K, Fayad F, Rannou F, et al. Validation of the French version of the fear avoidance belief questionnaire. *Spine* 2004;29:908-13. doi:10.1097/00007632-200404150-00018
  101. Waddell G, Newton M, Henderson I, et al. A Fear-Avoidance Beliefs Questionnaire (FABQ) and the role of fear-avoidance beliefs in chronic low back pain and disability. *Pain* 1993;52:157-68. doi:10.1016/0304-3959(93)90127-B
  102. Institute of Social and Preventive Medicine. CINeMA: Confidence in Network Meta-Analysis University of Bern; 2017 [Available from: cinema.ispm.unibe.ch].
  103. Nikolakopoulou A, Higgins JP, Papakonstantinou T, et al. CINeMA: an approach for assessing confidence in the results of a network meta-analysis. *PLoS Med* 2020;17:e1003082. doi:10.1371/journal.pmed.1003082
  104. Papakonstantinou T, Nikolakopoulou A, Higgins JP, et al. CINeMA: Software for semiautomated assessment of the confidence in the results of network meta-analysis. *Campbell Syst Rev* 2020;16:e1080. doi:10.1002/cl2.1080
  105. Altman DG, Bland JM. Statistics notes: Absence of evidence is not evidence of absence. *BMJ* 1995;311:485. doi:10.1136/bmj.311.7003.485
